# Supplementary material for: Tissue-specific impact of stem-loops and quadruplexes on cancer breakpoints formation
Source: Springer Nature journal article supplement (doi:10.1186/s12885-019-5653-x), 2019-05-10
Supplement: MOESM1 [file 16715546]

## Supplementary figures

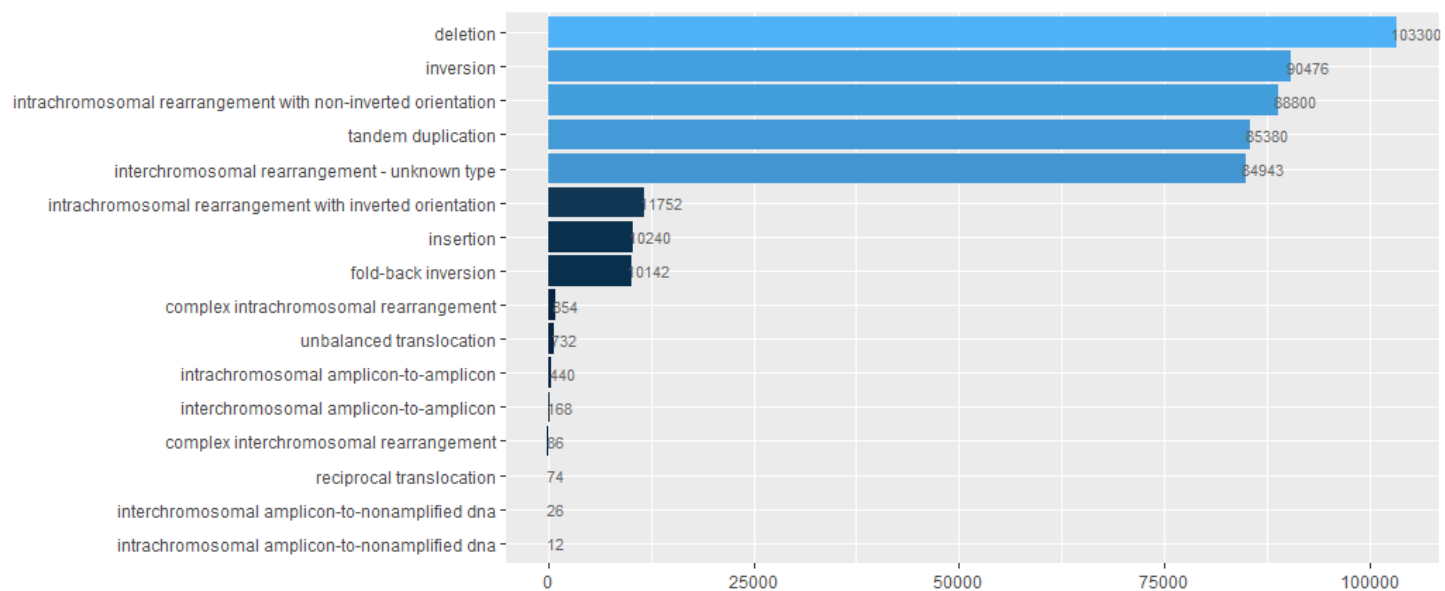

**Figure S1.** The number of breakpoints by variant type.

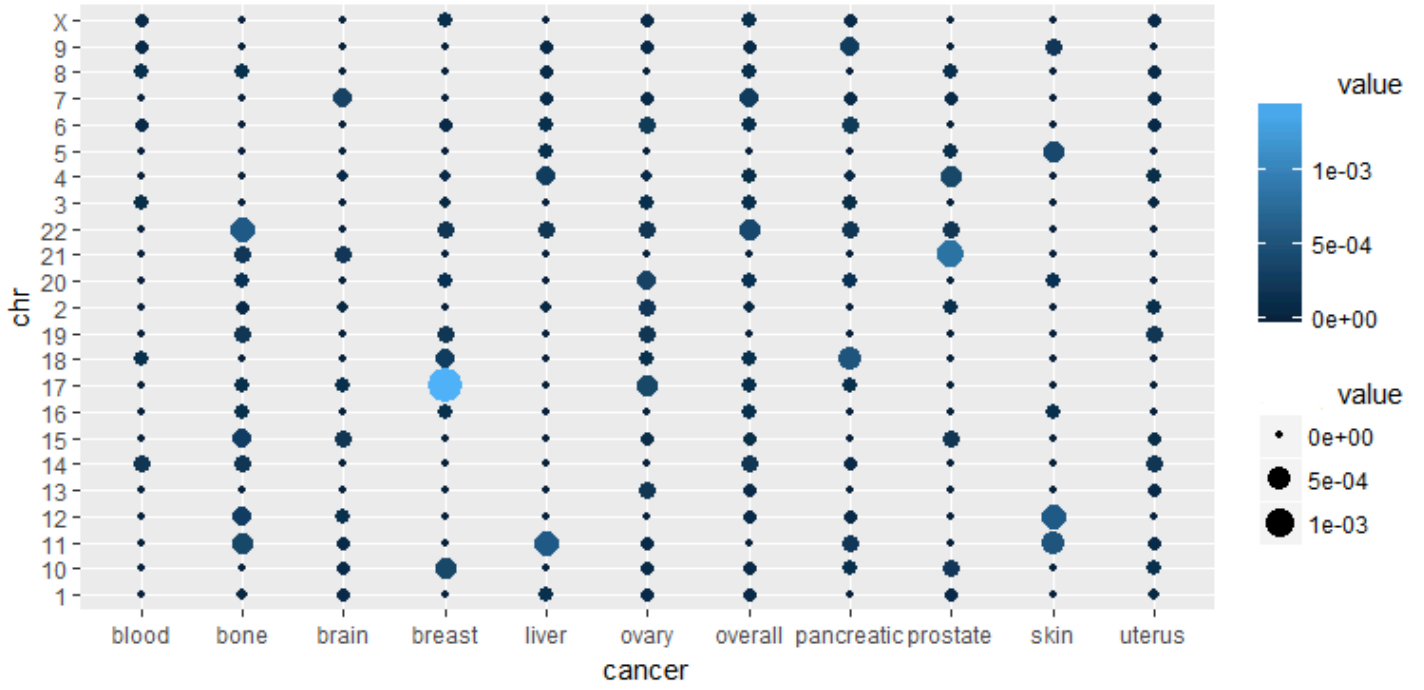

**Figure S2.** The number of breakpoint hotspots by the chromosomes and types of cancer for 0.01% labeling type.

A

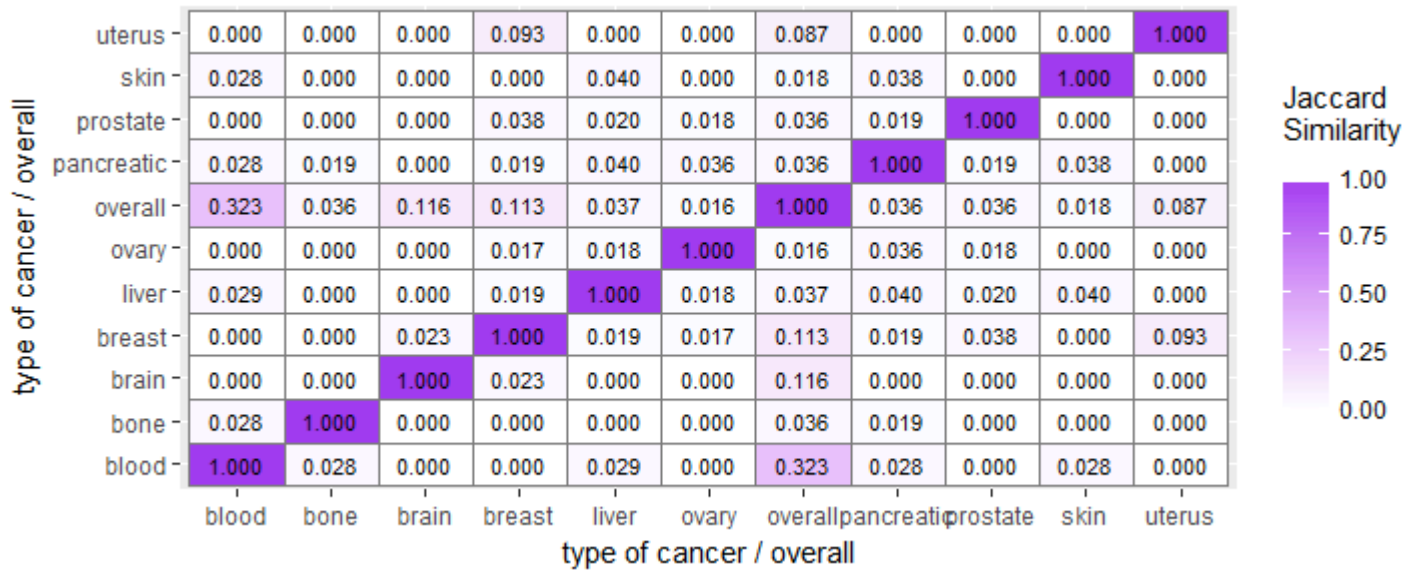

B

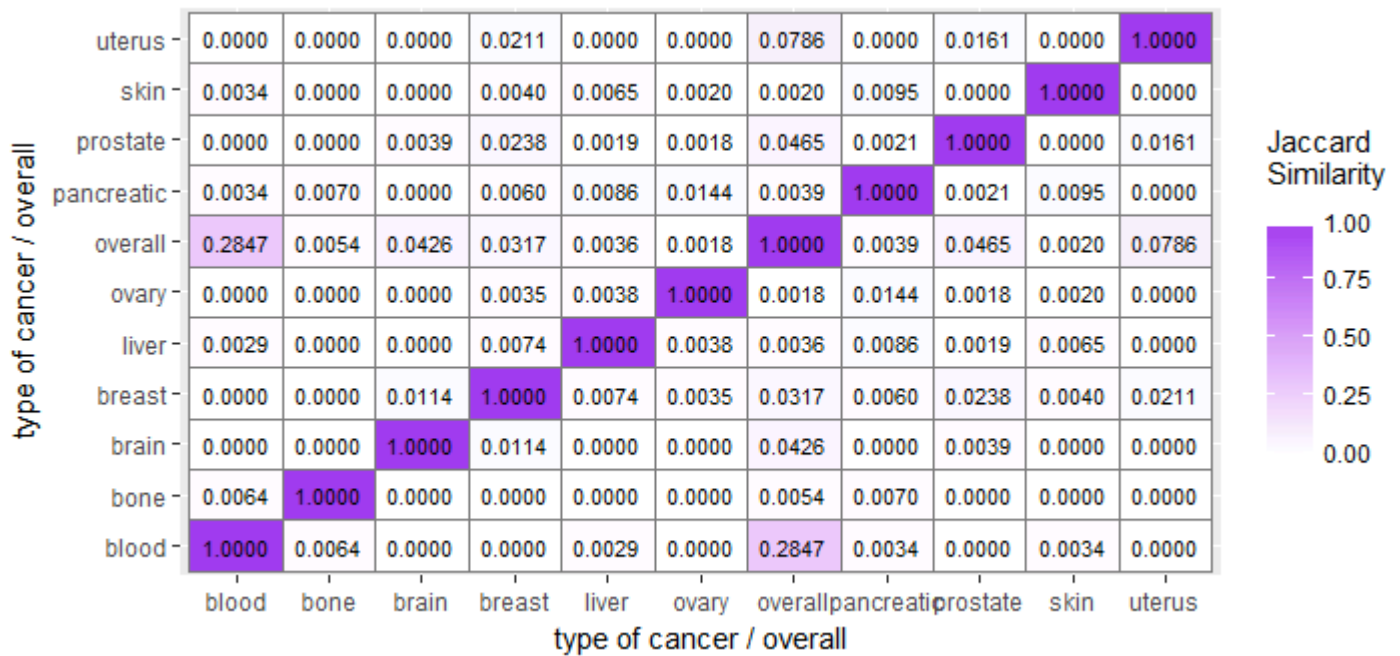

**Figure S3. A.** Jaccard similarity between breakpoints hotspots profiles for different cancer types at 0.1% labeling type. **B.** Jaccard similarity between breakpoints hotspots profiles for different cancer types at 0.01% labeling type.

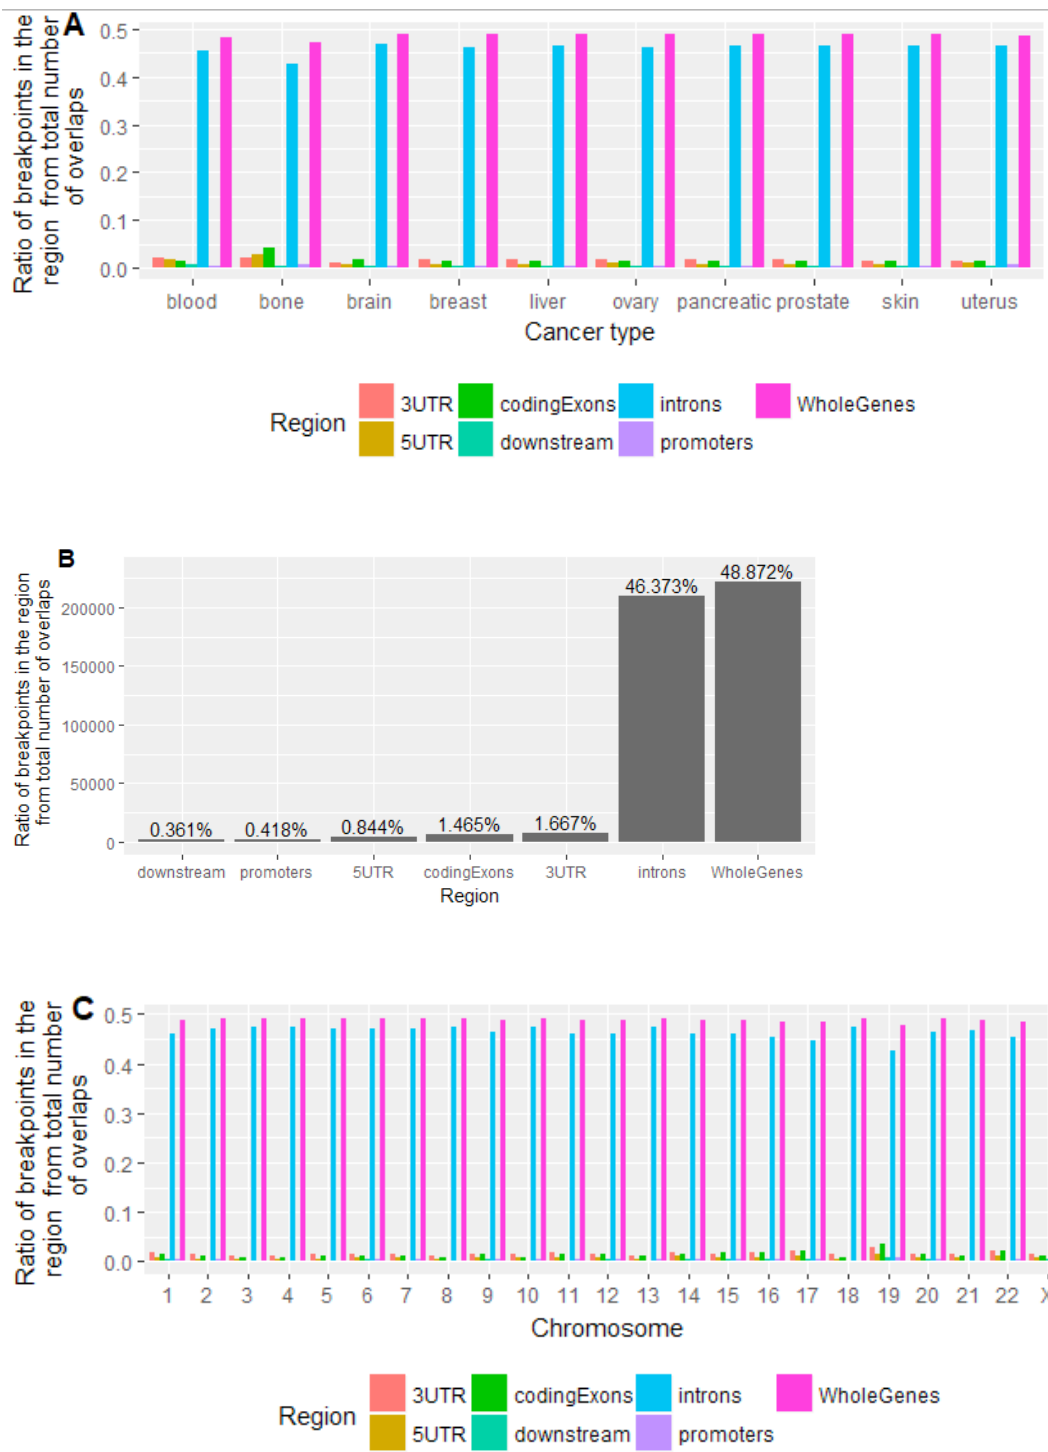

**Figure S4. A.** Distributions of breakpoints intersecting with whole genes, exons, introns, 5'UTR, 3'UTR, promoters and downstream regions in different cancers. **B.** Distributions of the total number of breakpoints over genomic regions. **C.** Distributions of the total number of breakpoints over genomic regions per chromosomes.

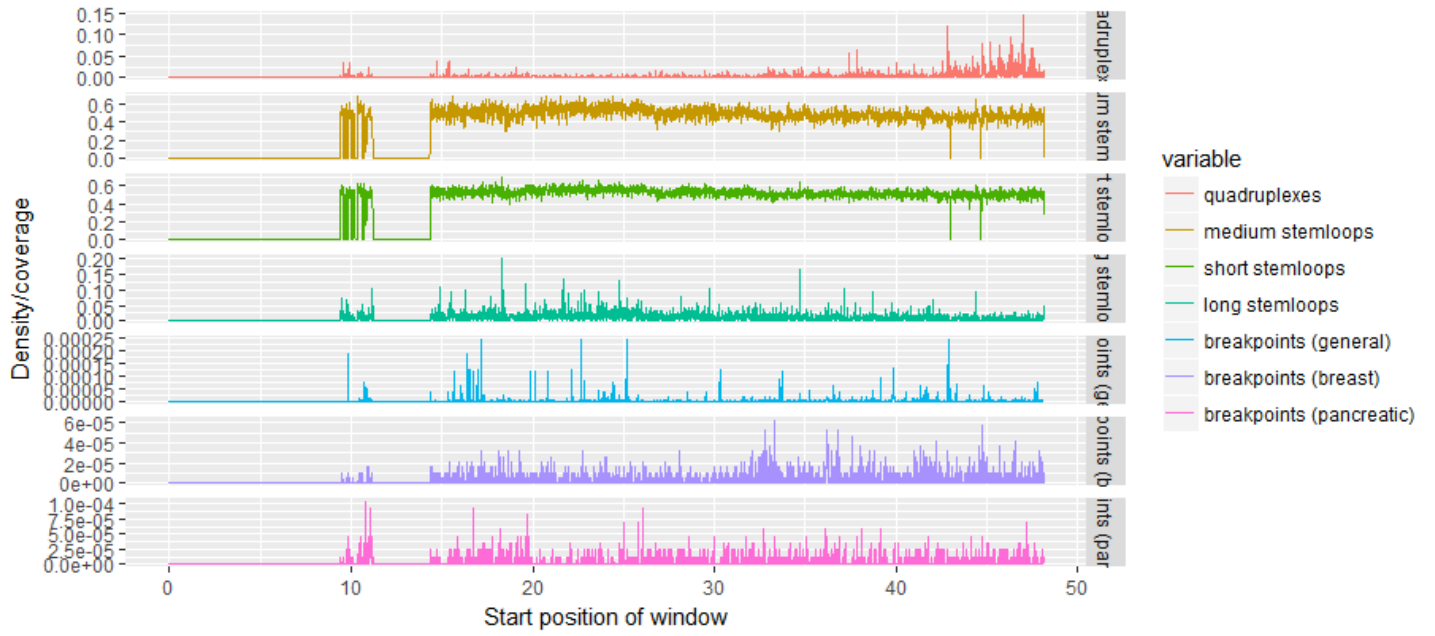

**Figure S5.** Breakpoints density and coverage of stem-loops and quadruplexes for 21 chromosome (in Mb).

A

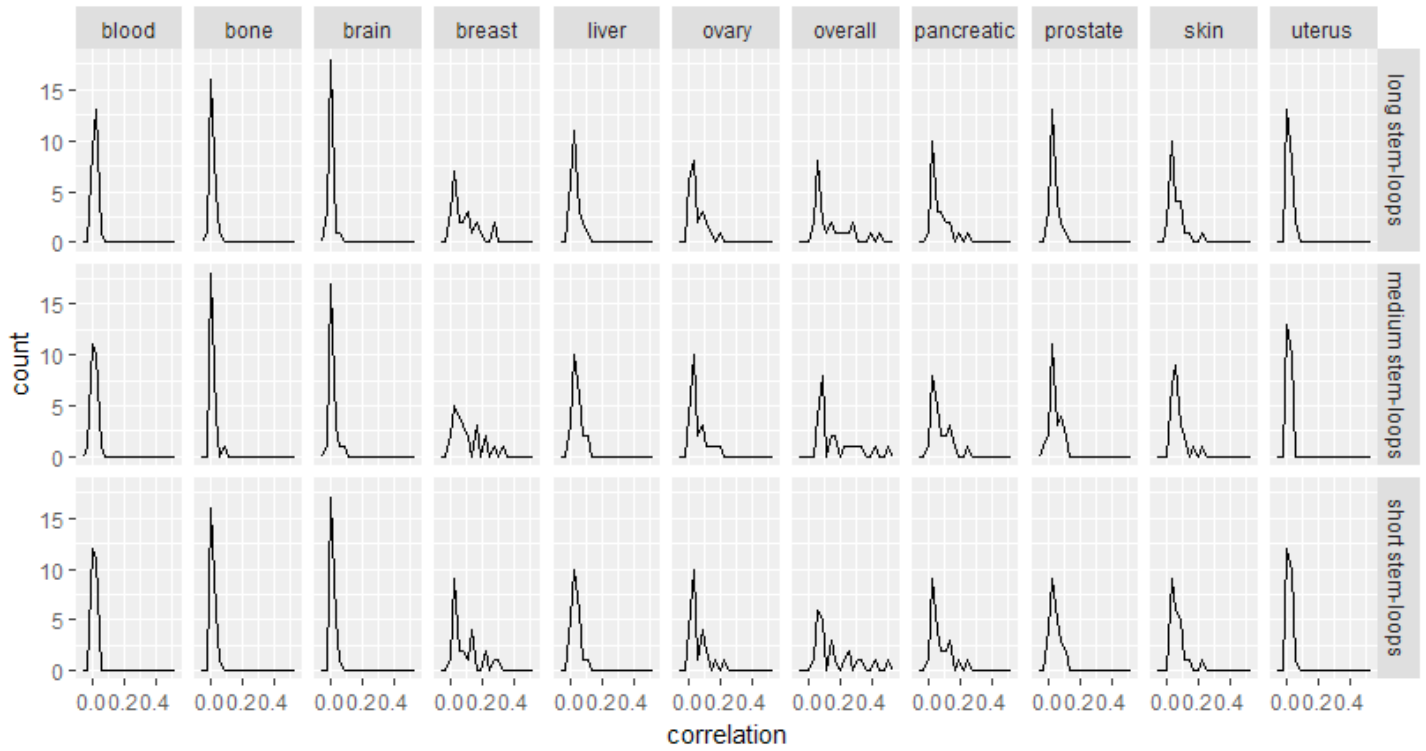

B

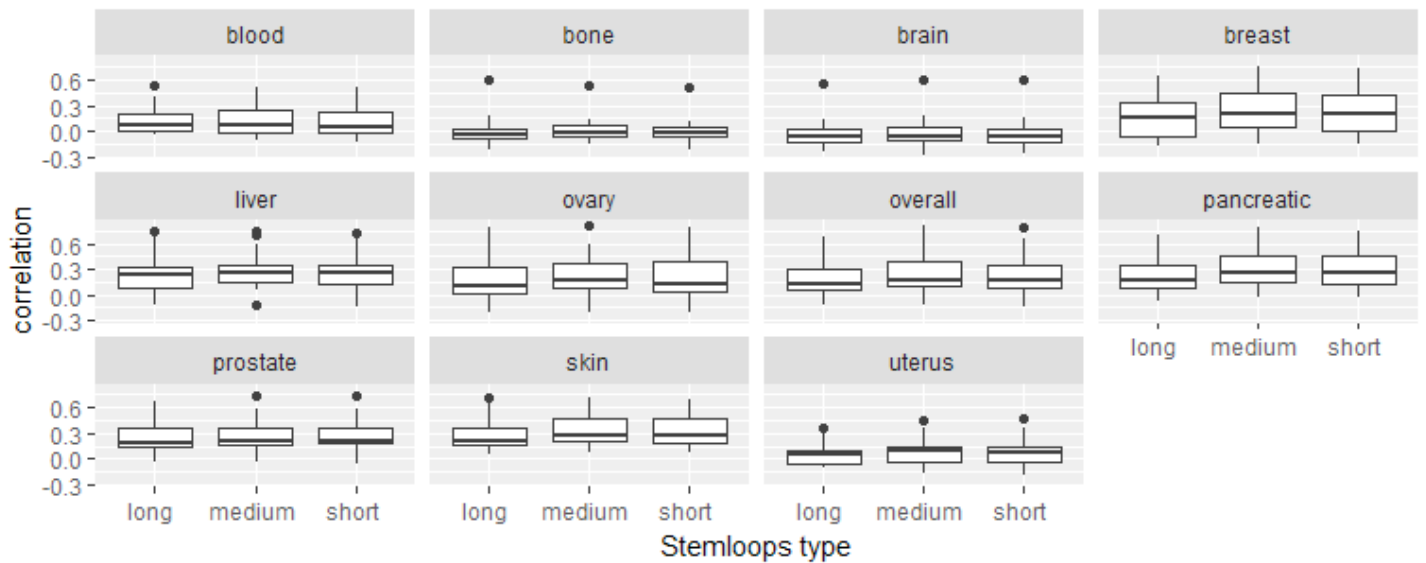

**Figure S6. A.** Histograms of chromosomes' correlations between densities of cancer profiles and the coverage of stem-loops at 10 kb aggregation level. **B.** Boxplots of chromosomes' correlations between densities of cancer profiles and the coverage of stem-loops at 1 Mb aggregation level.

A

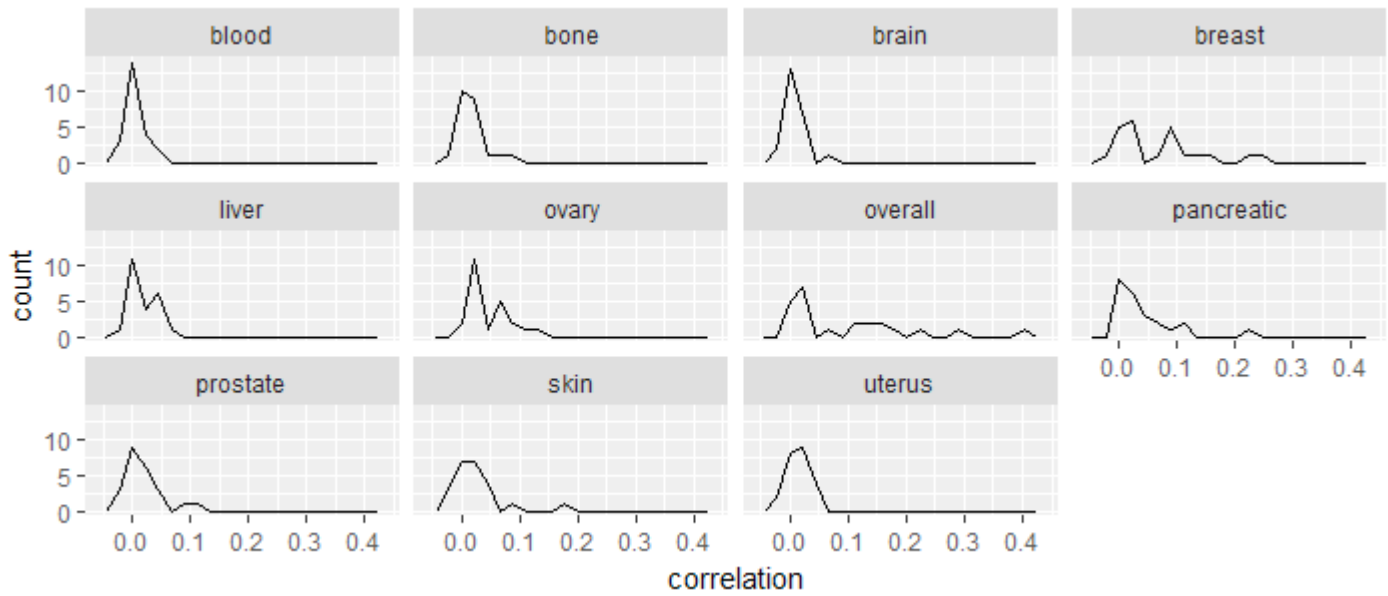

B

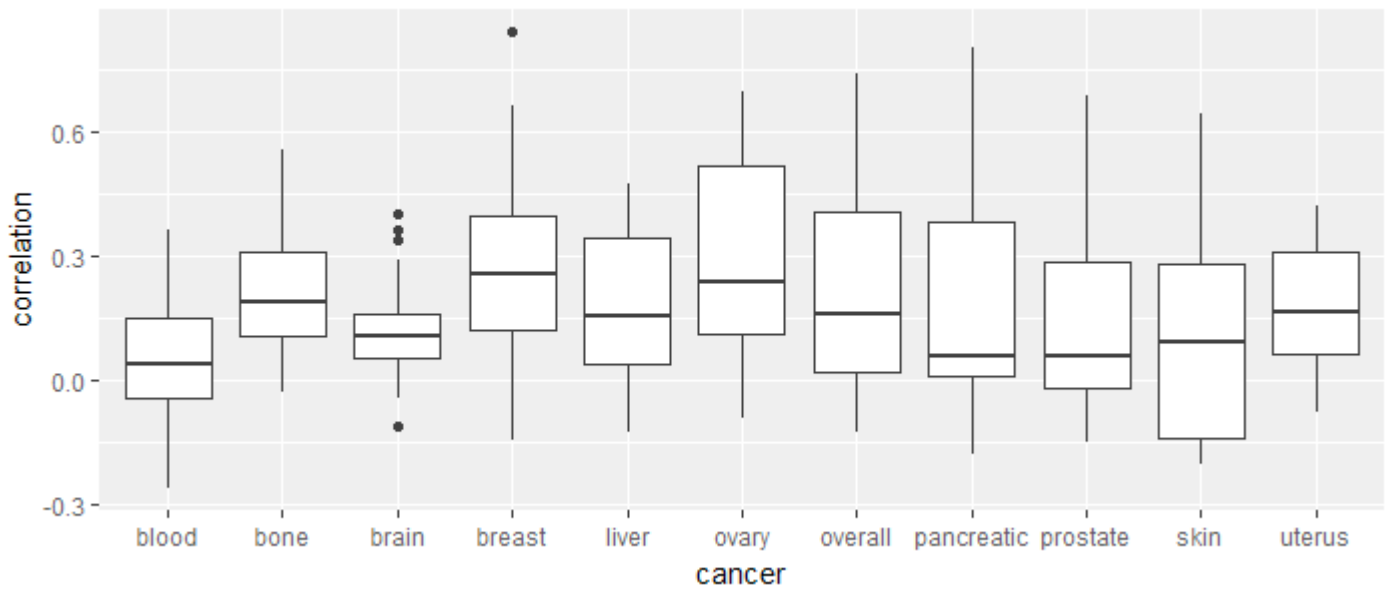

**Figure S7. A.** Histograms of chromosomes' correlations between the densities of cancer profiles and the coverage of quadruplexes at 10 kb aggregation level. **B.** Boxplots of chromosomes' correlation between the densities of cancer profiles and the coverage of quadruplexes at 1 mb aggregation level.

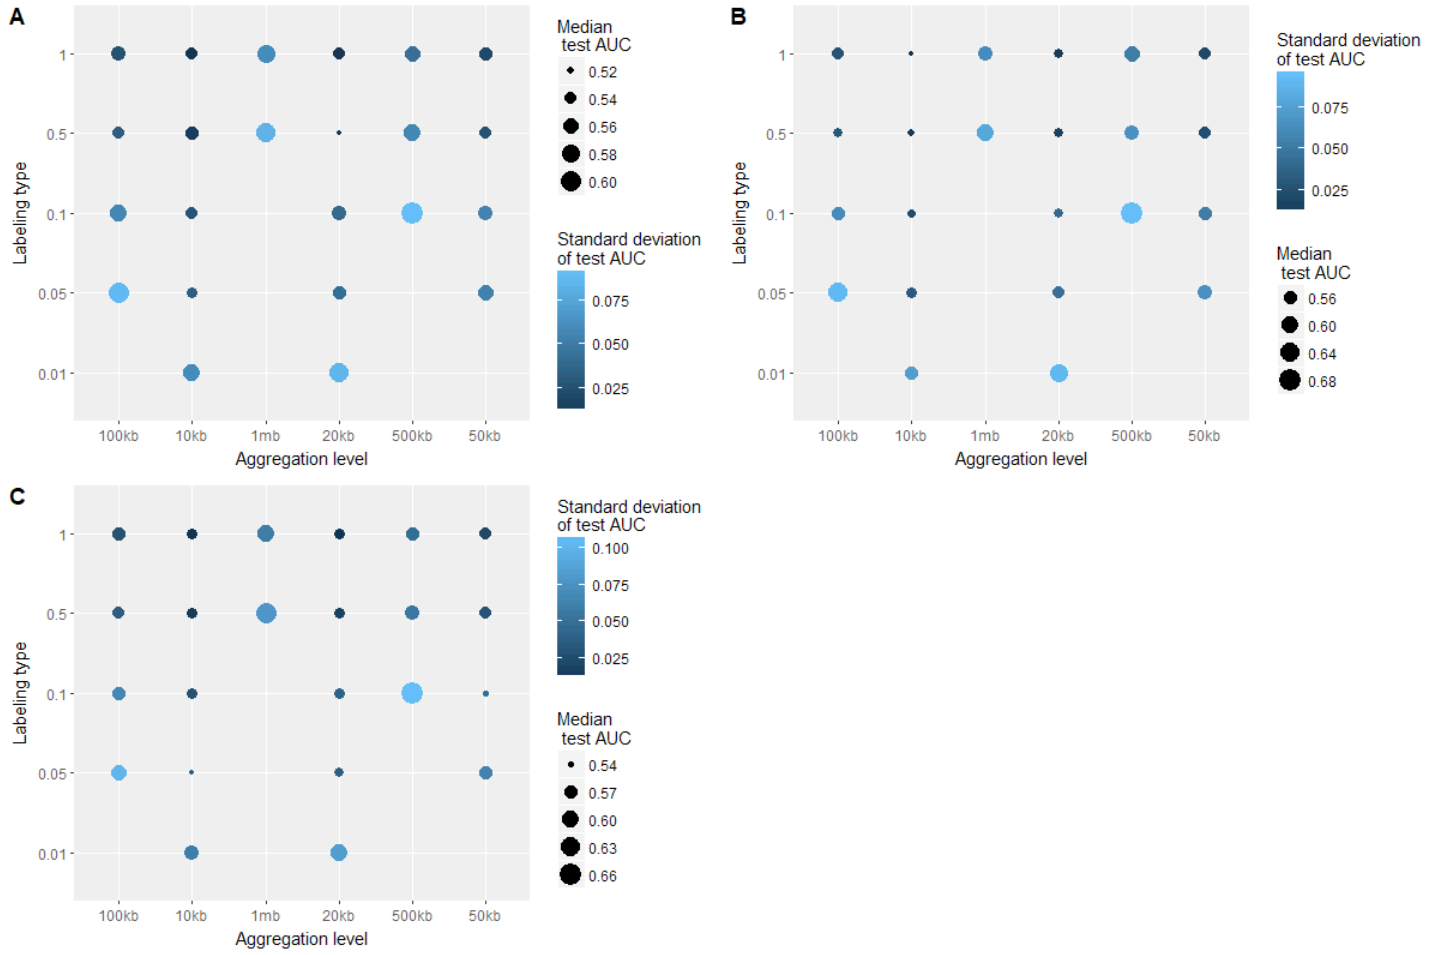

**Figure S8.** Distributions of the median value of the standard deviation in datasets and the median of test AUC grouped by the aggregation level and the labeling type. **A.** Stem-loop-based models. **B.** Quadruplex-based models. **C.** Joint stem-loop and quadruplex-based model.



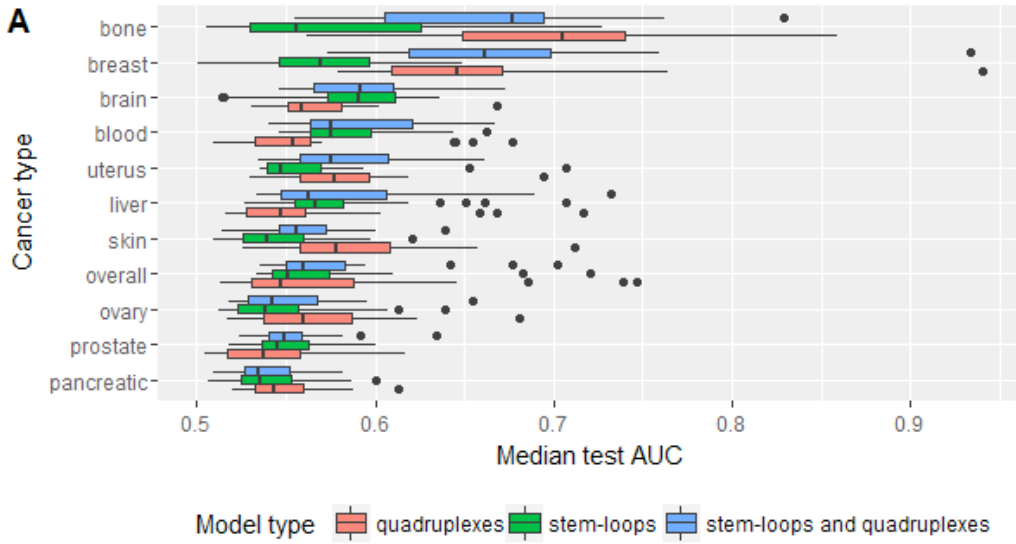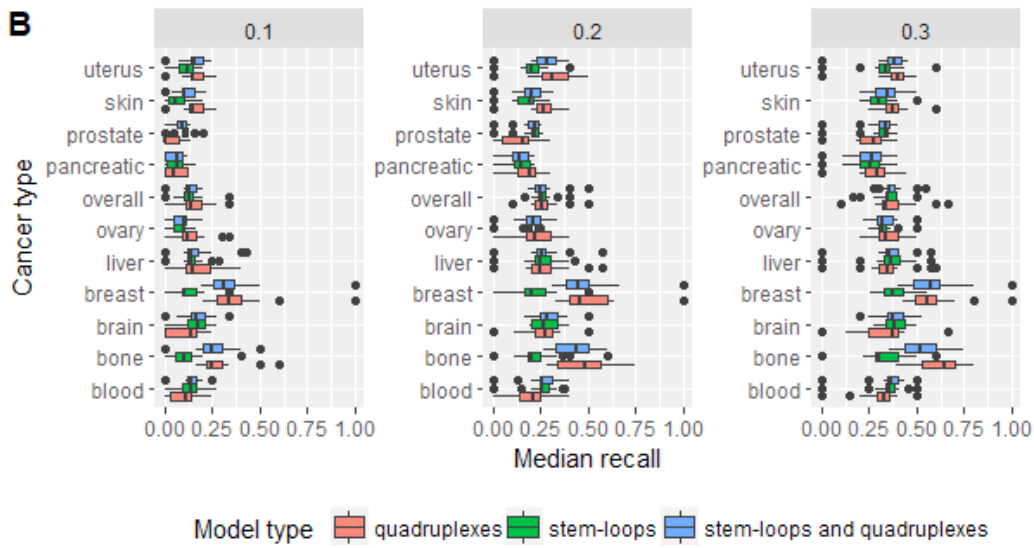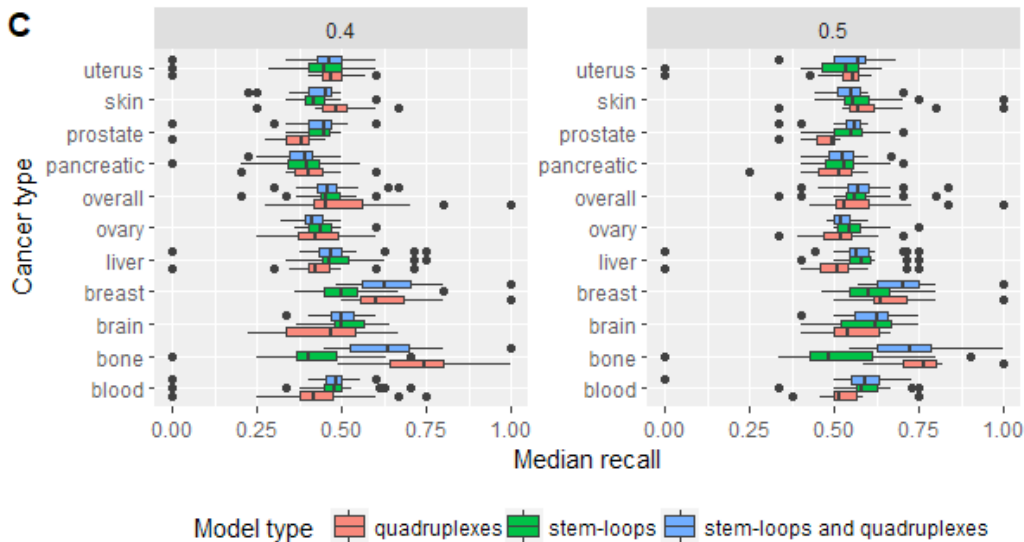

**Figure S9.** Comparison of three models – stem-loop-, quadruplex- and joint stem-loop and quadruplex-based models. **A.** Median Test AUC. **B-C.** Median recall for 5 probability quantiles: 0.1, 0.2, 0.3, 0.4, 0.5.

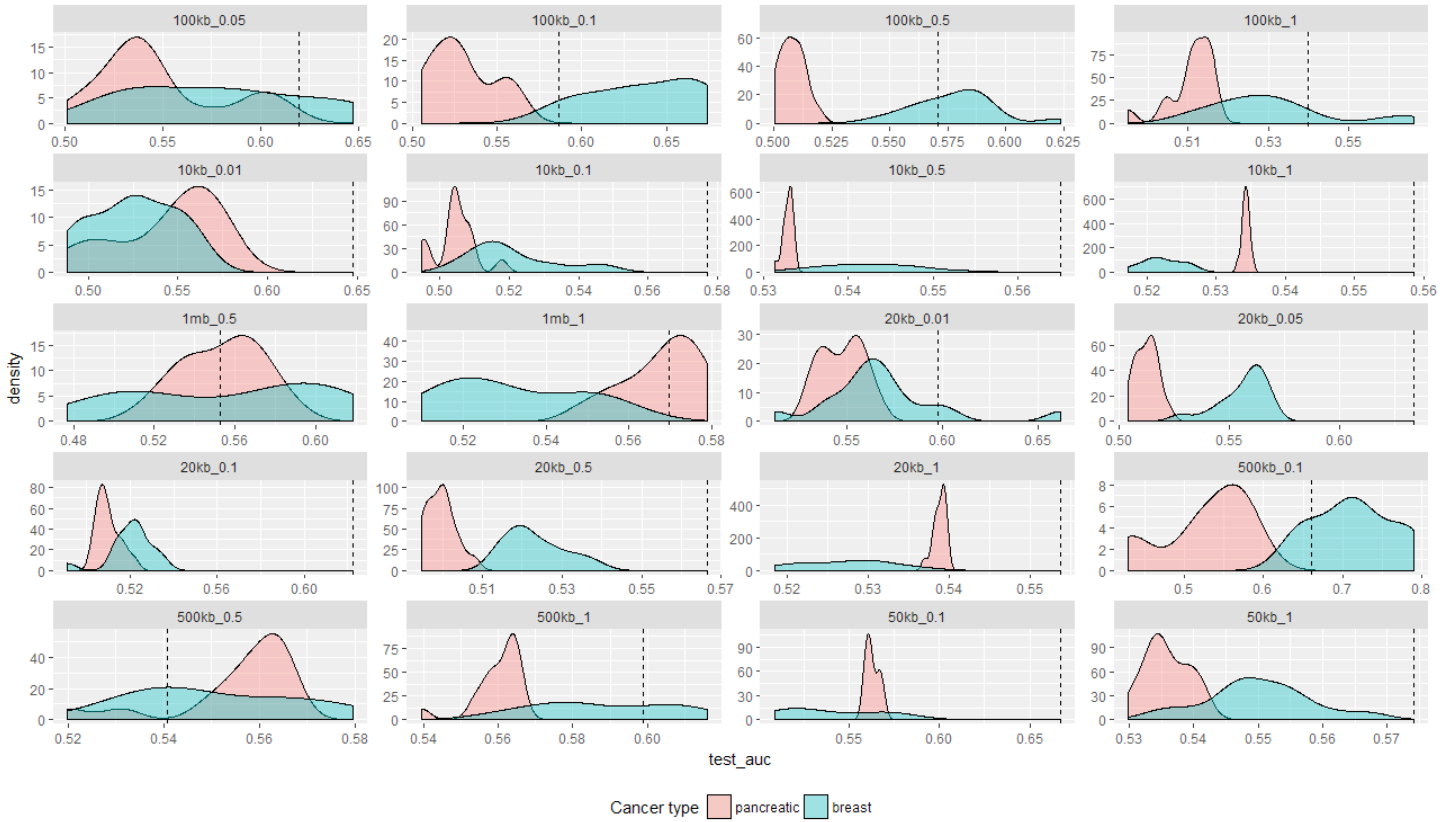

**Figure S10.** Prediction by the best blood cancer model the breakpoint hotspots in the breast and pancreatic cancers. All combinations of hotspot regions and labeling types are considered. The dashed line designates the median test AUC achieved by the best blood cancer model to predict hotspots in the blood cancer.

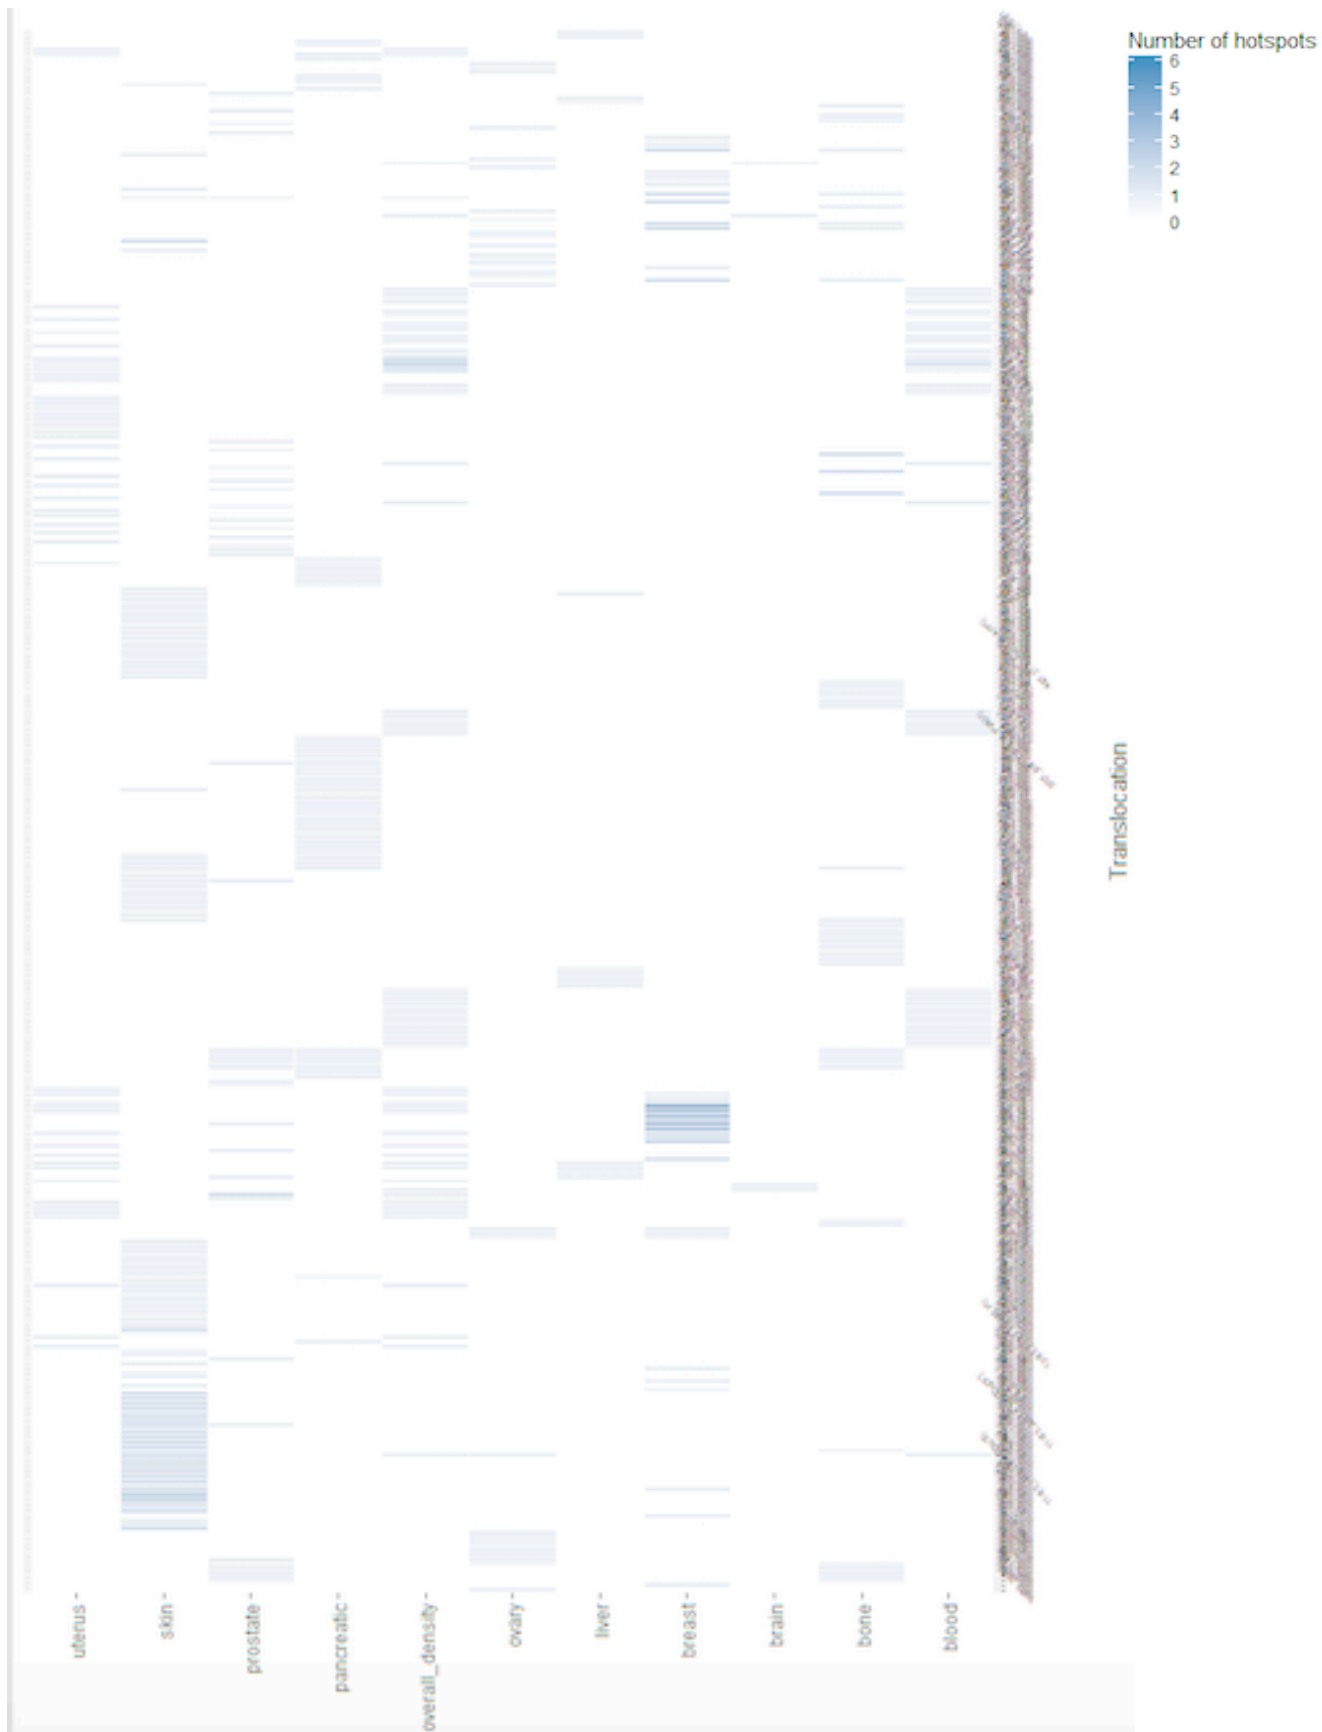

**Figure S11.** Intersections of breakpoint hotspots with known translocations from the Mitelman database over the entire genome in different cancers. 5 known gene fusions IGL-CCND1, CTNNB1-PLAG1, FUS-ATF1, IGH-CCND1, KMT2A-AFF1 re adesignated.

**A**  
chr\_from\_range  
Min. : 0.00  
1st Qu.: 0.00  
Median : 5.00  
Mean : 14.28  
3rd Qu.: 10.00  
Max. :10000.00  
NA's :53726

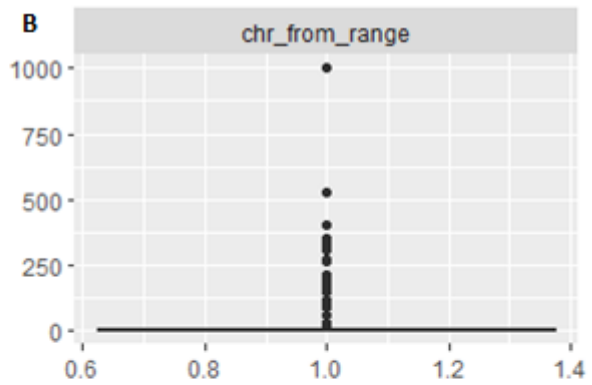

**C**  
chr\_to\_range  
Min. : 0.0  
1st Qu.: 0.0  
Median : 5.0  
Mean : 14.3  
3rd Qu.: 10.0  
Max. :10000.0  
NA's :53726

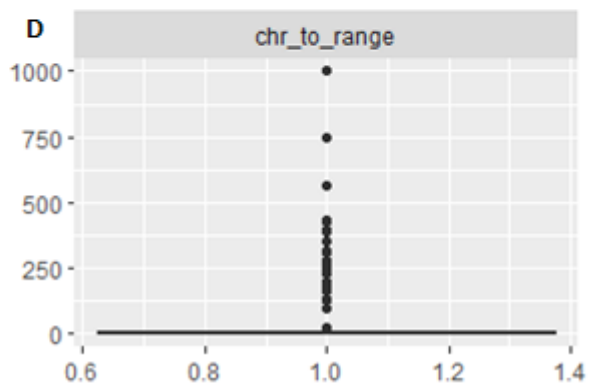

**Figure S12.** Boxplots of the fields "chr\_from\_range" and "chr\_to\_range".

## Supplementary tables

**Table S1.** The number of samples, donors and breakpoints grouped by cancer type.

| Cancer type | Number of samples | Number of donors | Number of breakpoints |
|-------------|-------------------|------------------|-----------------------|
| brain       | 72                | 72               | 1564                  |
| blood       | 118               | 118              | 2330                  |
| bone        | 117               | 117              | 2546                  |
| uterus      | 16                | 7                | 6782                  |
| liver       | 255               | 243              | 22324                 |
| prostate    | 212               | 161              | 48126                 |
| skin        | 190               | 190              | 54688                 |
| ovary       | 115               | 93               | 71446                 |
| pancreatic  | 495               | 447              | 85769                 |
| breast      | 644               | 644              | 191850                |

**Table S2.** The number of breakpoint hotspots grouped by the cancer type, aggregation level and labeling type.

| Cancer type       |               | blood | bone | brain | breast | liver | ovary | overall | pancreatic | prostate | skin | uterus |
|-------------------|---------------|-------|------|-------|--------|-------|-------|---------|------------|----------|------|--------|
| Aggregation level |               |       |      |       |        |       |       |         |            |          |      |        |
|                   | Labeling type |       |      |       |        |       |       |         |            |          |      |        |
| 10 kb             | 0.01          | 10    | 27   | 17    | 28     | 25    | 31    | 31      | 27         | 27       | 27   | 19     |
|                   | 0.05          | 84    | 74   | 43    | 152    | 86    | 74    | 152     | 74         | 138      | 121  | 48     |
|                   | 0.1           | 84    | 74   | 243   | 291    | 256   | 277   | 295     | 215        | 268      | 212  | 48     |
|                   | 0.5           | 622   | 1427 | 1088  | 1251   | 690   | 1024  | 1519    | 1404       | 1443     | 732  | 564    |
|                   | 1             | 1533  | 1427 | 1088  | 1919   | 690   | 1024  | 3023    | 1404       | 2689     | 1603 | 2276   |
| 20 kb             | 0.01          | 14    | 11   | 12    | 16     | 14    | 10    | 16      | 14         | 16       | 11   | 5      |
|                   | 0.05          | 67    | 46   | 53    | 70     | 67    | 54    | 74      | 69         | 69       | 68   | 71     |
|                   | 0.1           | 97    | 84   | 53    | 138    | 67    | 132   | 152     | 141        | 115      | 147  | 71     |
|                   | 0.5           | 634   | 624  | 546   | 698    | 676   | 483   | 760     | 695        | 619      | 667  | 740    |
|                   | 1             | 1489  | 1370 | 1027  | 1389   | 1081  | 1369  | 1519    | 1394       | 1461     | 1312 | 740    |
| 50 kb             | 0.01          | 5     | 6    | 6     | 7      | 7     | 5     | 7       | 6          | 7        | 7    | 5      |
|                   | 0.05          | 31    | 29   | 16    | 30     | 21    | 29    | 31      | 27         | 31       | 30   | 31     |
|                   | 0.1           | 31    | 33   | 42    | 59     | 60    | 50    | 61      | 48         | 54       | 60   | 41     |
|                   | 0.5           | 170   | 106  | 72    | 288    | 209   | 279   | 304     | 245        | 278      | 287  | 149    |
|                   | 1             | 170   | 606  | 335   | 577    | 363   | 419   | 608     | 432        | 533      | 564  | 149    |
| 100 kb            | 0.01          | 3     | 4    | 4     | 4      | 4     | 4     | 4       | 4          | 4        | 2    | 3      |
|                   | 0.05          | 11    | 15   | 10    | 16     | 14    | 13    | 16      | 16         | 16       | 15   | 16     |
|                   | 0.1           | 25    | 29   | 26    | 31     | 25    | 28    | 31      | 29         | 30       | 30   | 21     |
|                   | 0.5           | 144   | 122  | 96    | 146    | 136   | 123   | 152     | 142        | 144      | 152  | 127    |
|                   | 1             | 232   | 122  | 96    | 297    | 250   | 231   | 304     | 301        | 281      | 304  | 265    |
| 500 kb            | 0.01          | 1     | 1    | 1     | 1      | 1     | 1     | 1       | 1          | 1        | 1    | 1      |
|                   | 0.05          | 4     | 4    | 4     | 4      | 4     | 4     | 4       | 4          | 4        | 4    | 2      |
|                   | 0.1           | 7     | 7    | 7     | 7      | 7     | 7     | 7       | 7          | 7        | 7    | 7      |
|                   | 0.5           | 25    | 29   | 26    | 31     | 29    | 30    | 31      | 29         | 31       | 31   | 21     |
|                   | 1             | 48    | 56   | 44    | 61     | 51    | 58    | 61      | 58         | 61       | 58   | 44     |
| 1 mb              | 0.01          | 1     | 1    | 1     | 1      | 1     | 1     | 1       | 1          | 1        | 1    | 1      |
|                   | 0.05          | 2     | 2    | 2     | 2      | 2     | 1     | 2       | 2          | 2        | 2    | 2      |
|                   | 0.1           | 4     | 4    | 4     | 4      | 4     | 3     | 4       | 4          | 4        | 4    | 2      |
|                   | 0.5           | 13    | 13   | 14    | 16     | 16    | 16    | 16      | 16         | 16       | 15   | 15     |
|                   | 1             | 23    | 29   | 25    | 31     | 31    | 31    | 31      | 31         | 30       | 31   | 31     |



**Table S3.** The stem-loops based models: the median and the third quantile of recall (in brackets) for each cancer type and quantile.

| Cancer type | Probability quantiles |                      |                      |                      |                      |
|-------------|-----------------------|----------------------|----------------------|----------------------|----------------------|
|             | 0.1                   | 0.2                  | 0.3                  | 0.4                  | 0.5                  |
| blood       | 0.1345<br>( 0.1685 )  | 0.2571<br>( 0.2904 ) | 0.3567<br>( 0.3812 ) | 0.4762<br>( 0.5000 ) | 0.5779<br>( 0.6278 ) |
| bone        | 0.0978<br>( 0.1332 )  | 0.2000<br>( 0.2500 ) | 0.3028<br>( 0.3994 ) | 0.3991<br>( 0.4812 ) | 0.4808<br>( 0.6082 ) |
| brain       | 0.1771<br>( 0.2143 )  | 0.2608<br>( 0.3393 ) | 0.3852<br>( 0.4391 ) | 0.5000<br>( 0.5637 ) | 0.6214<br>( 0.6667 ) |
| breast      | 0.1031<br>( 0.1601 )  | 0.2000<br>( 0.2774 ) | 0.3737<br>( 0.4245 ) | 0.5000<br>( 0.5444 ) | 0.6000<br>( 0.6594 ) |
| liver       | 0.1364<br>( 0.1556 )  | 0.2479<br>( 0.3000 ) | 0.3667<br>( 0.4091 ) | 0.4651<br>( 0.5172 ) | 0.5783<br>( 0.6071 ) |
| ovary       | 0.0972<br>( 0.1029 )  | 0.2000<br>( 0.2032 ) | 0.3189<br>( 0.3333 ) | 0.4389<br>( 0.4689 ) | 0.5437<br>( 0.5731 ) |
| overall     | 0.1287<br>( 0.1443 )  | 0.2549<br>( 0.2727 ) | 0.3500<br>( 0.3888 ) | 0.4510<br>( 0.4949 ) | 0.5573<br>( 0.5908 ) |
| pancreatic  | 0.0616<br>( 0.0900 )  | 0.1462<br>( 0.1911 ) | 0.2581<br>( 0.2968 ) | 0.3969<br>( 0.4345 ) | 0.5282<br>( 0.5550 ) |
| prostate    | 0.1064<br>( 0.1161 )  | 0.2174<br>( 0.2351 ) | 0.3333<br>( 0.3494 ) | 0.4474<br>( 0.4639 ) | 0.5506<br>( 0.5790 ) |
| skin        | 0.0588<br>( 0.0981 )  | 0.1926<br>( 0.2063 ) | 0.2992<br>( 0.3389 ) | 0.4180<br>( 0.4478 ) | 0.5521<br>( 0.6000 ) |
| uterus      | 0.1174<br>( 0.1429 )  | 0.2000<br>( 0.2356 ) | 0.3333<br>( 0.3604 ) | 0.4453<br>( 0.5000 ) | 0.5319<br>( 0.5714 ) |

**Table S4.** The stem-loop based models: the metrics for the best stem-loop-based models for each cancer type.

| Cancer type | Best stem-loop-based model |          |                      |               |                |                 |
|-------------|----------------------------|----------|----------------------|---------------|----------------|-----------------|
|             | Aggregation level          | Labeling | Probability quantile | Median recall | Lift of recall | Median test AUC |
| skin        | 1mb                        | 0.5      | 0.10                 | 0.2           | 2.00           | 0.55            |
| overall     | 500kb                      | 0.1      | 0.05                 | 0.33          | 6.67           | 0.72            |
| prostate    | 20kb                       | 0.1      | 0.05                 | 0.10          | 2.05           | 0.55            |
| uterus      | 1mb                        | 0.5      | 0.05                 | 0.20          | 4.00           | 0.65            |
| bone        | 100kb                      | 0.05     | 0.1                  | 0.40          | 4.00           | 0.68            |
| brain       | 20kb                       | 0.1      | 0.05                 | 0.17          | 3.33           | 0.63            |
| breast      | 10kb                       | 0.01     | 0.10                 | 0.33          | 3.33           | 0.63            |
| ovary       | 1mb                        | 1        | 0.05                 | 0.09          | 1.82           | 0.59            |
| pancreatic  | 1mb                        | 0.5      | 0.1                  | 0.17          | 1.67           | 0.58            |
| blood       | 50kb                       | 0.1      | 0.05                 | 0.18          | 3.64           | 0.66            |
| liver       | 50kb                       | 0.05     | 0.05                 | 0.29          | 5.72           | 0.71            |

**Table S5.** The quadruplex-based models: the median and the third quantile of recall (in brackets) among all datasets for each cancer type and quantile.

| Cancer type | 0.1                  | 0.2                  | 0.3                  | 0.4                  | 0.5                  |
|-------------|----------------------|----------------------|----------------------|----------------------|----------------------|
| blood       | 0.1098<br>( 0.1380 ) | 0.2123<br>( 0.2500 ) | 0.3274<br>( 0.3601 ) | 0.4171<br>( 0.4710 ) | 0.5146<br>( 0.5647 ) |
| bone        | 0.2470<br>( 0.3031 ) | 0.4821<br>( 0.5667 ) | 0.6515<br>( 0.7000 ) | 0.7434<br>( 0.8000 ) | 0.7639<br>( 0.8000 ) |
| brain       | 0.1381<br>( 0.1660 ) | 0.2775<br>( 0.3058 ) | 0.3743<br>( 0.4000 ) | 0.4701<br>( 0.5384 ) | 0.5408<br>( 0.6287 ) |
| breast      | 0.3333<br>( 0.4000 ) | 0.4545<br>( 0.6000 ) | 0.5556<br>( 0.6000 ) | 0.6000<br>( 0.6833 ) | 0.6336<br>( 0.7113 ) |
| liver       | 0.1429<br>( 0.2353 ) | 0.2500<br>( 0.3000 ) | 0.3451<br>( 0.3750 ) | 0.4235<br>( 0.4643 ) | 0.5097<br>( 0.5412 ) |
| ovary       | 0.1181<br>( 0.1616 ) | 0.2183<br>( 0.2980 ) | 0.3344<br>( 0.3976 ) | 0.4223<br>( 0.4860 ) | 0.5180<br>( 0.5474 ) |
| overall     | 0.1373<br>( 0.1909 ) | 0.2549<br>( 0.2864 ) | 0.3400<br>( 0.4000 ) | 0.4510<br>( 0.5598 ) | 0.5296<br>( 0.6000 ) |
| pancreatic  | 0.0481<br>( 0.1179 ) | 0.1903<br>( 0.2222 ) | 0.2878<br>( 0.3292 ) | 0.4014<br>( 0.4434 ) | 0.5139<br>( 0.5493 ) |
| prostate    | 0.0000<br>( 0.0697 ) | 0.1573<br>( 0.1836 ) | 0.2778<br>( 0.3060 ) | 0.3824<br>( 0.4000 ) | 0.4928<br>( 0.5000 ) |
| skin        | 0.1429<br>( 0.1990 ) | 0.2609<br>( 0.3000 ) | 0.3739<br>( 0.4000 ) | 0.4851<br>( 0.5147 ) | 0.5684<br>( 0.6164 ) |
| uterus      | 0.1489<br>( 0.2000 ) | 0.3077<br>( 0.3957 ) | 0.4000<br>( 0.4286 ) | 0.4659<br>( 0.5000 ) | 0.5532<br>( 0.5714 ) |

**Table S6.** The quadruplex-based models: the metrics for the best quadruplex-based models for each cancer type.

|             | Best quadruplex-based model |          |                      |               |                |                 |
|-------------|-----------------------------|----------|----------------------|---------------|----------------|-----------------|
| Cancer type | Aggregation level           | Labeling | Probability quantile | Median recall | Lift of recall | Median test AUC |
| skin        | 1mb                         | 0.5      | 0.05                 | 0.2           | 4              | 0.64            |
| overall     | 20kb                        | 0.01     | 0.15                 | 0.5           | 3.3            | 0.65            |
| prostate    | 50kb                        | 0.05     | 0.15                 | 0.27          | 1.8            | 0.56            |
| uterus      | 100kb                       | 0.05     | 0.05                 | 0.2           | 4              | 0.61            |
| bone        | 20kb                        | 0.01     | 0.05                 | 0.5           | 10             | 0.86            |
| brain       | 20kb                        | 0.1      | 0.05                 | 0.17          | 3.3            | 0.56            |
| breast      | 500kb                       | 0.1      | 0.10                 | 1             | 10             | 0.94            |
| ovary       | 500kb                       | 0.1      | 0.05                 | 0.33          | 6.67           | 0.68            |
| pancreatic  | 100kb                       | 0.05     | 0.35                 | 0.6           | 1.71           | 0.57            |
| blood       | 20kb                        | 0.01     | 0.05                 | 0.2           | 4              | 0.65            |
| liver       | 10kb                        | 0.01     | 0.05                 | 0.22          | 4.4            | 0.55            |

**Table S7.** The joint stem-loop and quadruplex-based models: the median and the third quantile of recall (in brackets) for each cancer type and quantile.

| Cancer type | 0.1                  | 0.2                  | 0.3                  | 0.4                  | 0.5                  |
|-------------|----------------------|----------------------|----------------------|----------------------|----------------------|
| blood       | 0.1364<br>( 0.1619 ) | 0.2542<br>( 0.3125 ) | 0.3687<br>( 0.4023 ) | 0.4852<br>( 0.5000 ) | 0.5888<br>( 0.6328 ) |
| bone        | 0.2420<br>( 0.3031 ) | 0.4365<br>( 0.5000 ) | 0.5179<br>( 0.6000 ) | 0.6369<br>( 0.6974 ) | 0.7208<br>( 0.7833 ) |
| brain       | 0.1689<br>( 0.2143 ) | 0.2793<br>( 0.3333 ) | 0.3750<br>( 0.4286 ) | 0.5000<br>( 0.5354 ) | 0.6250<br>( 0.6589 ) |
| breast      | 0.3125<br>( 0.3660 ) | 0.4490<br>( 0.5000 ) | 0.5714<br>( 0.6182 ) | 0.6250<br>( 0.7000 ) | 0.7000<br>( 0.7483 ) |
| liver       | 0.1364<br>( 0.1724 ) | 0.2530<br>( 0.2759 ) | 0.3556<br>( 0.4000 ) | 0.4699<br>( 0.5000 ) | 0.5652<br>( 0.6000 ) |
| ovary       | 0.0988<br>( 0.1111 ) | 0.2061<br>( 0.2440 ) | 0.3169<br>( 0.3755 ) | 0.4124<br>( 0.4437 ) | 0.5189<br>( 0.5425 ) |
| overall     | 0.1324<br>( 0.1618 ) | 0.2451<br>( 0.2759 ) | 0.3557<br>( 0.3827 ) | 0.4563<br>( 0.4826 ) | 0.5714<br>( 0.6000 ) |
| pancreatic  | 0.0597<br>( 0.0952 ) | 0.1416<br>( 0.1852 ) | 0.2620<br>( 0.3074 ) | 0.3932<br>( 0.4136 ) | 0.5240<br>( 0.5524 ) |
| prostate    | 0.0960<br>( 0.1141 ) | 0.2174<br>( 0.2366 ) | 0.3421<br>( 0.3567 ) | 0.4498<br>( 0.4663 ) | 0.5583<br>( 0.5748 ) |
| skin        | 0.1000<br>( 0.1512 ) | 0.2000<br>( 0.2424 ) | 0.3438<br>( 0.3842 ) | 0.4500<br>( 0.4685 ) | 0.5492<br>( 0.5753 ) |
| uterus      | 0.1591<br>( 0.2000 ) | 0.2857<br>( 0.3267 ) | 0.3864<br>( 0.4167 ) | 0.4615<br>( 0.5000 ) | 0.5673<br>( 0.5907 ) |

**Table S8.** The joint stem-loop and quadruplex-based models: the metrics for the best joint stem-loop and quadruplex-based models for each cancer type.

|             | Best stem-loop and quadruplex-based model |          |                |                      |               |                 |
|-------------|-------------------------------------------|----------|----------------|----------------------|---------------|-----------------|
| Cancer type | Aggregation level                         | Labeling | Lift of recall | Probability quantile | Median recall | Median test AUC |
| skin        | 100kb                                     | 0.5      | 2.16           | 0.1                  | 0.22          | 0.56            |
| overall     | 1mb                                       | 0.5      | 3.33           | 0.05                 | 0.17          | 0.68            |
| prostate    | 100 kb                                    | 0.5      | 1.67           | 0.05                 | 0.08          | 0.54            |
| uterus      | 1mb                                       | 0.5      | 4              | 0.05                 | 0.2           | 0.64            |
| bone        | 20kb                                      | 0.01     | 10             | 0.05                 | 0.5           | 0.83            |
| brain       | 100kb                                     | 0.05     | 5              | 0.05                 | 0.25          | 0.67            |
| breast      | 500kb                                     | 0.1      | 10             | 0.1                  | 1             | 0.93            |
| ovary       | 500kb                                     | 0.1      | 2.22           | 0.15                 | 0.33          | 0.65            |
| pancreatic  | 1mb                                       | 0.5      | 1.33           | 0.15                 | 0.2           | 0.58            |
| blood       | 50kb                                      | 0.1      | 4              | 0.05                 | 0.2           | 0.67            |
| liver       | 50kb                                      | 0.05     | 5.72           | 0.05                 | 0.29          | 0.73            |

**Table S9.** Used fields in cancer breakpoints data table

| Field name     | field description                                                                                                                 |
|----------------|-----------------------------------------------------------------------------------------------------------------------------------|
| donor_id       | Identification key of a donor                                                                                                     |
| sample_id      | Identification key of specimen which was obtained from a donor. It is possible that data contain several specimens from one donor |
| sv_id          | Identification key of a particular structural variant observation                                                                 |
| chr_from       | Label of the donor chromosome which contains variation                                                                            |
| chr_from_bkpt  | Position (in base pairs) of breakpoint of the variation on the donor chromosome                                                   |
| chr_from_range | Number of bases around chr_from_bkpt that may contain the real breakpoint                                                         |
| chr_to         | Label of the acceptor chromosome which contains variation                                                                         |
| chr_to_bkpt    | Position (in base pairs) of breakpoint of the variation on the acceptor chromosome                                                |
| chr_to_range   | Number of bases around chr_to_bkpt that may contain the real breakpoint                                                           |

Fields “chr\_from\_bkpt” and “chr\_from\_range” describe position of breakpoint in chromosome (“chr\_from” / “chr\_to”). Inaccuracy of the position is shown in “chr\_from\_bkpt” / “chr\_to\_range” fields.

**Table S10.** The number of new cancer cases by type.

| Cancer type | Number of new cases in 2012 | Ratio         |
|-------------|-----------------------------|---------------|
| brain       | 256                         | 0,03971455166 |
| blood       | 918                         | 0,14241390009 |
| bone        | 44                          | 0,00682593857 |
| uterus      | 848                         | 0,13155445237 |
| liver       | 782                         | 0,12131554452 |
| prostate    | 1112                        | 0,17251008377 |
| skin        | 232                         | 0,03599131244 |
| ovary       | 239                         | 0,03707725721 |
| pancreatic  | 338                         | 0,05243561899 |
| breast      | 1677                        | 0,26016134037 |
