# Supplementary material for: Tissue-specific impact of stem-loops and quadruplexes on cancer breakpoints formation
Source: BMC Cancer. 2019 May 10;19:434. doi: 10.1186/s12885-019-5653-x (PMC6511154; doi:10.1186/s12885-019-5653-x)
Supplement: Supplementary file 4 — Breakpoint density at 6 aggregation levels. (XLSX 75829 kb) [file 12885_2019_5653_MOESM4_ESM.xlsx]

## Sheet: structural_mutation_final_10_kb
	chr	window	from	to	bkpt_in_window_blood	bkpt_in_window_bone	bkpt_in_window_brain	bkpt_in_window_breast	bkpt_in_window_liver	bkpt_in_window_ovary	bkpt_in_window_pancreatic	bkpt_in_window_prostate	bkpt_in_window_skin	bkpt_in_window_uterus	density_blood	density_bone	density_brain	density_breast	density_liver	density_ovary	density_pancreatic	density_prostate	density_skin	density_uterus	prod_density_blood	prod_density_brain	prod_density_bone	prod_density_uterus	prod_density_liver	prod_density_prostate	prod_density_skin	prod_density_ovary	prod_density_pancreatic	prod_density_breast	overall_density	blood_bkpt_hotspot_0.1	bone_bkpt_hotspot_0.1	brain_bkpt_hotspot_0.1	breast_bkpt_hotspot_0.1	liver_bkpt_hotspot_0.1	ovary_bkpt_hotspot_0.1	pancreatic_bkpt_hotspot_0.1	prostate_bkpt_hotspot_0.1	skin_bkpt_hotspot_0.1	uterus_bkpt_hotspot_0.1	overall_density_bkpt_hotspot_0.1	blood_bkpt_hotspot_0.05	bone_bkpt_hotspot_0.05	brain_bkpt_hotspot_0.05
1	1	1	0	10000	0	0	0	0	0	0	0	0	0	0	0	0	0	0	0	0	0	0	0	0	0	0	0	0	0	0	0	0	0	0	0	0	0	0	0	0	0	0	0	0	0	0	0	0	0
2	1	10	90000	100000	0	0	0	0	0	0	0	0	0	0	0	0	0	0	0	0	0	0	0	0	0	0	0	0	0	0	0	0	0	0	0	0	0	0	0	0	0	0	0	0	0	0	0	0	0
3	1	100	990000	1000000	0	0	0	0	0	0	0	0	1	0	0	0	0	0	0	0	0	0	1.82652e-05	0	0	0	0	0	0	0	6.57388e-07	0	0	0	6.57388e-07	0	0	0	0	0	0	0	0	0	0	0	0	0	0
4	1	1000	9990000	10000000	0	0	0	2	0	1	2	0	0	0	0	0	0	1.04224e-05	0	1.39678e-05	2.33299e-05	0	0	0	0	0	0	0	0	0	0	5.17889e-07	1.22332e-06	2.7115e-06	4.4527e-06	0	0	0	0	0	0	0	0	0	0	0	0	0	0
5	1	10000	99990000	100000000	0	0	0	4	0	0	0	0	0	0	0	0	0	2.08447e-05	0	0	0	0	0	0	0	0	0	0	0	0	0	0	0	5.42299e-06	5.42299e-06	0	0	0	0	0	0	0	0	0	0	0	0	0	0
6	1	10001	100000000	100010000	0	0	0	1	1	0	0	0	0	0	0	0	0	5.21118e-06	4.48209e-05	0	0	0	0	0	0	0	0	0	5.43748e-06	0	0	0	0	1.35575e-06	6.79323e-06	0	0	0	0	0	0	0	0	0	0	0	0	0	0
7	1	10002	100010000	100020000	0	0	0	2	0	0	0	0	0	0	0	0	0	1.04224e-05	0	0	0	0	0	0	0	0	0	0	0	0	0	0	0	2.7115e-06	2.7115e-06	0	0	0	0	0	0	0	0	0	0	0	0	0	0
8	1	10003	100020000	100030000	0	0	0	2	0	0	0	0	0	0	0	0	0	1.04224e-05	0	0	0	0	0	0	0	0	0	0	0	0	0	0	0	2.7115e-06	2.7115e-06	0	0	0	0	0	0	0	0	0	0	0	0	0	0
9	1	10004	100030000	100040000	0	0	0	0	0	0	0	0	0	0	0	0	0	0	0	0	0	0	0	0	0	0	0	0	0	0	0	0	0	0	0	0	0	0	0	0	0	0	0	0	0	0	0	0	0
10	1	10005	100040000	100050000	0	0	0	0	0	0	0	0	0	0	0	0	0	0	0	0	0	0	0	0	0	0	0	0	0	0	0	0	0	0	0	0	0	0	0	0	0	0	0	0	0	0	0	0	0
11	1	10006	100050000	100060000	0	0	0	0	0	0	0	0	0	0	0	0	0	0	0	0	0	0	0	0	0	0	0	0	0	0	0	0	0	0	0	0	0	0	0	0	0	0	0	0	0	0	0	0	0
12	1	10007	100060000	100070000	0	0	0	0	0	0	0	0	0	0	0	0	0	0	0	0	0	0	0	0	0	0	0	0	0	0	0	0	0	0	0	0	0	0	0	0	0	0	0	0	0	0	0	0	0
13	1	10008	100070000	100080000	0	0	0	1	0	0	0	0	2	0	0	0	0	5.21118e-06	0	0	0	0	3.65303e-05	0	0	0	0	0	0	0	1.31478e-06	0	0	1.35575e-06	2.67052e-06	0	0	0	0	0	0	0	0	0	0	0	0	0	0
14	1	10009	100080000	100090000	0	0	0	0	0	0	0	0	0	0	0	0	0	0	0	0	0	0	0	0	0	0	0	0	0	0	0	0	0	0	0	0	0	0	0	0	0	0	0	0	0	0	0	0	0
15	1	1001	10000000	10010000	0	0	0	0	0	0	1	0	0	0	0	0	0	0	0	0	1.16649e-05	0	0	0	0	0	0	0	0	0	0	0	6.11658e-07	0	6.11658e-07	0	0	0	0	0	0	0	0	0	0	0	0	0	0
16	1	10010	100090000	100100000	0	0	0	0	0	1	0	0	0	0	0	0	0	0	0	1.39678e-05	0	0	0	0	0	0	0	0	0	0	0	5.17889e-07	0	0	5.17889e-07	0	0	0	0	0	0	0	0	0	0	0	0	0	0
17	1	10011	100100000	100110000	0	0	0	0	0	0	0	0	0	0	0	0	0	0	0	0	0	0	0	0	0	0	0	0	0	0	0	0	0	0	0	0	0	0	0	0	0	0	0	0	0	0	0	0	0
18	1	10012	100110000	100120000	0	0	0	0	0	0	0	0	0	0	0	0	0	0	0	0	0	0	0	0	0	0	0	0	0	0	0	0	0	0	0	0	0	0	0	0	0	0	0	0	0	0	0	0	0
19	1	10013	100120000	100130000	0	0	0	0	1	0	0	0	0	0	0	0	0	0	4.48209e-05	0	0	0	0	0	0	0	0	0	5.43748e-06	0	0	0	0	0	5.43748e-06	0	0	0	0	0	0	0	0	0	0	0	0	0	0
20	1	10014	100130000	100140000	0	0	0	1	0	0	0	5	0	0	0	0	0	5.21118e-06	0	0	0	0.000104295	0	0	0	0	0	0	0	1.79919e-05	0	0	0	1.35575e-06	1.93477e-05	0	0	0	0	0	0	0	0	0	0	0	0	0	0
21	1	10015	100140000	100150000	0	0	0	0	1	0	0	0	0	0	0	0	0	0	4.48209e-05	0	0	0	0	0	0	0	0	0	5.43748e-06	0	0	0	0	0	5.43748e-06	0	0	0	0	0	0	0	0	0	0	0	0	0	0
22	1	10016	100150000	100160000	0	0	0	0	0	0	3	1	0	0	0	0	0	0	0	0	3.49948e-05	2.0859e-05	0	0	0	0	0	0	0	3.59838e-06	0	0	1.83497e-06	0	5.43336e-06	0	0	0	0	0	0	0	0	0	0	0	0	0	0
23	1	10017	100160000	100170000	0	0	0	2	0	0	0	1	0	0	0	0	0	1.04224e-05	0	0	0	2.0859e-05	0	0	0	0	0	0	0	3.59838e-06	0	0	0	2.7115e-06	6.30988e-06	0	0	0	0	0	0	0	0	0	0	0	0	0	0
24	1	10018	100170000	100180000	0	0	0	0	0	0	0	0	0	0	0	0	0	0	0	0	0	0	0	0	0	0	0	0	0	0	0	0	0	0	0	0	0	0	0	0	0	0	0	0	0	0	0	0	0
25	1	10019	100180000	100190000	0	0	0	3	0	0	0	0	0	0	0	0	0	1.56335e-05	0	0	0	0	0	0	0	0	0	0	0	0	0	0	0	4.06725e-06	4.06725e-06	0	0	0	0	0	0	0	0	0	0	0	0	0	0
26	1	1002	10010000	10020000	0	0	0	0	0	0	2	0	0	0	0	0	0	0	0	0	2.33299e-05	0	0	0	0	0	0	0	0	0	0	0	1.22332e-06	0	1.22332e-06	0	0	0	0	0	0	0	0	0	0	0	0	0	0
27	1	10020	100190000	100200000	0	0	0	0	0	0	0	0	0	0	0	0	0	0	0	0	0	0	0	0	0	0	0	0	0	0	0	0	0	0	0	0	0	0	0	0	0	0	0	0	0	0	0	0	0
28	1	10021	100200000	100210000	0	0	0	0	0	0	0	0	0	0	0	0	0	0	0	0	0	0	0	0	0	0	0	0	0	0	0	0	0	0	0	0	0	0	0	0	0	0	0	0	0	0	0	0	0
29	1	10022	100210000	100220000	0	0	0	0	0	0	0	0	0	0	0	0	0	0	0	0	0	0	0	0	0	0	0	0	0	0	0	0	0	0	0	0	0	0	0	0	0	0	0	0	0	0	0	0	0
30	1	10023	100220000	100230000	0	0	0	0	0	0	1	0	0	0	0	0	0	0	0	0	1.16649e-05	0	0	0	0	0	0	0	0	0	0	0	6.11658e-07	0	6.11658e-07	0	0	0	0	0	0	0	0	0	0	0	0	0	0
31	1	10024	100230000	100240000	0	0	0	0	0	0	2	0	0	0	0	0	0	0	0	0	2.33299e-05	0	0	0	0	0	0	0	0	0	0	0	1.22332e-06	0	1.22332e-06	0	0	0	0	0	0	0	0	0	0	0	0	0	0
32	1	10025	100240000	100250000	0	0	0	3	0	0	0	0	0	0	0	0	0	1.56335e-05	0	0	0	0	0	0	0	0	0	0	0	0	0	0	0	4.06725e-06	4.06725e-06	0	0	0	0	0	0	0	0	0	0	0	0	0	0
33	1	10026	100250000	100260000	0	0	0	0	0	0	0	0	0	0	0	0	0	0	0	0	0	0	0	0	0	0	0	0	0	0	0	0	0	0	0	0	0	0	0	0	0	0	0	0	0	0	0	0	0
34	1	10027	100260000	100270000	0	0	0	0	0	0	0	0	0	0	0	0	0	0	0	0	0	0	0	0	0	0	0	0	0	0	0	0	0	0	0	0	0	0	0	0	0	0	0	0	0	0	0	0	0
35	1	10028	100270000	100280000	0	0	0	3	0	2	0	0	0	0	0	0	0	1.56335e-05	0	2.79357e-05	0	0	0	0	0	0	0	0	0	0	0	1.03578e-06	0	4.06725e-06	5.10302e-06	0	0	0	0	0	0	0	0	0	0	0	0	0	0
36	1	10029	100280000	100290000	0	0	0	1	0	0	0	0	0	0	0	0	0	5.21118e-06	0	0	0	0	0	0	0	0	0	0	0	0	0	0	0	1.35575e-06	1.35575e-06	0	0	0	0	0	0	0	0	0	0	0	0	0	0
37	1	1003	10020000	10030000	0	0	0	1	0	0	2	0	0	0	0	0	0	5.21118e-06	0	0	2.33299e-05	0	0	0	0	0	0	0	0	0	0	0	1.22332e-06	1.35575e-06	2.57906e-06	0	0	0	0	0	0	0	0	0	0	0	0	0	0
38	1	10030	100290000	100300000	0	0	0	0	0	0	1	4	0	0	0	0	0	0	0	0	1.16649e-05	8.34359e-05	0	0	0	0	0	0	0	1.43935e-05	0	0	6.11658e-07	0	1.50052e-05	0	0	0	0	0	0	0	0	0	0	0	0	0	0
39	1	10031	100300000	100310000	0	0	0	0	0	4	0	0	0	0	0	0	0	0	0	5.58714e-05	0	0	0	0	0	0	0	0	0	0	0	2.07156e-06	0	0	2.07156e-06	0	0	0	0	0	0	0	0	0	0	0	0	0	0
40	1	10032	100310000	100320000	0	0	0	0	0	0	1	0	0	0	0	0	0	0	0	0	1.16649e-05	0	0	0	0	0	0	0	0	0	0	0	6.11658e-07	0	6.11658e-07	0	0	0	0	0	0	0	0	0	0	0	0	0	0
41	1	10033	100320000	100330000	0	0	0	0	0	0	0	0	0	0	0	0	0	0	0	0	0	0	0	0	0	0	0	0	0	0	0	0	0	0	0	0	0	0	0	0	0	0	0	0	0	0	0	0	0
42	1	10034	100330000	100340000	0	0	0	0	0	0	0	0	0	0	0	0	0	0	0	0	0	0	0	0	0	0	0	0	0	0	0	0	0	0	0	0	0	0	0	0	0	0	0	0	0	0	0	0	0
43	1	10035	100340000	100350000	0	0	0	0	0	0	1	0	0	0	0	0	0	0	0	0	1.16649e-05	0	0	0	0	0	0	0	0	0	0	0	6.11658e-07	0	6.11658e-07	0	0	0	0	0	0	0	0	0	0	0	0	0	0
44	1	10036	100350000	100360000	0	0	0	0	0	2	0	0	0	0	0	0	0	0	0	2.79357e-05	0	0	0	0	0	0	0	0	0	0	0	1.03578e-06	0	0	1.03578e-06	0	0	0	0	0	0	0	0	0	0	0	0	0	0
45	1	10037	100360000	100370000	0	0	0	1	0	0	0	0	0	0	0	0	0	5.21118e-06	0	0	0	0	0	0	0	0	0	0	0	0	0	0	0	1.35575e-06	1.35575e-06	0	0	0	0	0	0	0	0	0	0	0	0	0	0
46	1	10038	100370000	100380000	0	0	0	0	0	0	0	0	0	0	0	0	0	0	0	0	0	0	0	0	0	0	0	0	0	0	0	0	0	0	0	0	0	0	0	0	0	0	0	0	0	0	0	0	0
47	1	10039	100380000	100390000	0	0	0	0	1	0	0	1	0	0	0	0	0	0	4.48209e-05	0	0	2.0859e-05	0	0	0	0	0	0	5.43748e-06	3.59838e-06	0	0	0	0	9.03586e-06	0	0	0	0	0	0	0	0	0	0	0	0	0	0
48	1	1004	10030000	10040000	0	0	0	0	0	0	1	0	0	0	0	0	0	0	0	0	1.16649e-05	0	0	0	0	0	0	0	0	0	0	0	6.11658e-07	0	6.11658e-07	0	0	0	0	0	0	0	0	0	0	0	0	0	0
49	1	10040	100390000	100400000	0	0	0	1	0	0	0	0	0	0	0	0	0	5.21118e-06	0	0	0	0	0	0	0	0	0	0	0	0	0	0	0	1.35575e-06	1.35575e-06	0	0	0	0	0	0	0	0	0	0	0	0	0	0
50	1	10041	100400000	100410000	0	0	0	0	0	0	0	0	1	0	0	0	0	0	0	0	0	0	1.82652e-05	0	0	0	0	0	0	0	6.57388e-07	0	0	0	6.57388e-07	0	0	0	0	0	0	0	0	0	0	0	0	0	0
51	1	10042	100410000	100420000	0	0	0	0	0	0	0	0	0	0	0	0	0	0	0	0	0	0	0	0	0	0	0	0	0	0	0	0	0	0	0	0	0	0	0	0	0	0	0	0	0	0	0	0	0
52	1	10043	100420000	100430000	0	0	0	1	0	0	0	0	0	0	0	0	0	5.21118e-06	0	0	0	0	0	0	0	0	0	0	0	0	0	0	0	1.35575e-06	1.35575e-06	0	0	0	0	0	0	0	0	0	0	0	0	0	0
53	1	10044	100430000	100440000	0	0	0	0	0	2	0	0	3	0	0	0	0	0	0	2.79357e-05	0	0	5.47955e-05	0	0	0	0	0	0	0	1.97216e-06	1.03578e-06	0	0	3.00794e-06	0	0	0	0	0	0	0	0	0	0	0	0	0	0
54	1	10045	100440000	100450000	0	0	0	0	0	0	0	1	0	0	0	0	0	0	0	0	0	2.0859e-05	0	0	0	0	0	0	0	3.59838e-06	0	0	0	0	3.59838e-06	0	0	0	0	0	0	0	0	0	0	0	0	0	0
55	1	10046	100450000	100460000	0	0	0	0	0	0	0	0	0	0	0	0	0	0	0	0	0	0	0	0	0	0	0	0	0	0	0	0	0	0	0	0	0	0	0	0	0	0	0	0	0	0	0	0	0
56	1	10047	100460000	100470000	0	0	0	0	0	0	0	0	0	0	0	0	0	0	0	0	0	0	0	0	0	0	0	0	0	0	0	0	0	0	0	0	0	0	0	0	0	0	0	0	0	0	0	0	0
57	1	10048	100470000	100480000	0	0	0	0	0	0	0	0	0	0	0	0	0	0	0	0	0	0	0	0	0	0	0	0	0	0	0	0	0	0	0	0	0	0	0	0	0	0	0	0	0	0	0	0	0
58	1	10049	100480000	100490000	0	0	0	1	0	0	0	0	0	0	0	0	0	5.21118e-06	0	0	0	0	0	0	0	0	0	0	0	0	0	0	0	1.35575e-06	1.35575e-06	0	0	0	0	0	0	0	0	0	0	0	0	0	0
59	1	1005	10040000	10050000	0	0	0	0	0	0	0	0	0	0	0	0	0	0	0	0	0	0	0	0	0	0	0	0	0	0	0	0	0	0	0	0	0	0	0	0	0	0	0	0	0	0	0	0	0
60	1	10050	100490000	100500000	0	0	0	1	0	0	0	0	1	0	0	0	0	5.21118e-06	0	0	0	0	1.82652e-05	0	0	0	0	0	0	0	6.57388e-07	0	0	1.35575e-06	2.01314e-06	0	0	0	0	0	0	0	0	0	0	0	0	0	0
61	1	10051	100500000	100510000	0	0	0	4	0	0	0	0	0	0	0	0	0	2.08447e-05	0	0	0	0	0	0	0	0	0	0	0	0	0	0	0	5.42299e-06	5.42299e-06	0	0	0	0	0	0	0	0	0	0	0	0	0	0
62	1	10052	100510000	100520000	0	0	0	0	0	0	0	0	0	0	0	0	0	0	0	0	0	0	0	0	0	0	0	0	0	0	0	0	0	0	0	0	0	0	0	0	0	0	0	0	0	0	0	0	0
63	1	10053	100520000	100530000	0	0	0	0	0	0	0	0	2	0	0	0	0	0	0	0	0	0	3.65303e-05	0	0	0	0	0	0	0	1.31478e-06	0	0	0	1.31478e-06	0	0	0	0	0	0	0	0	0	0	0	0	0	0
64	1	10054	100530000	100540000	0	0	0	0	0	0	0	0	0	0	0	0	0	0	0	0	0	0	0	0	0	0	0	0	0	0	0	0	0	0	0	0	0	0	0	0	0	0	0	0	0	0	0	0	0
65	1	10055	100540000	100550000	0	0	0	0	0	0	0	0	0	0	0	0	0	0	0	0	0	0	0	0	0	0	0	0	0	0	0	0	0	0	0	0	0	0	0	0	0	0	0	0	0	0	0	0	0
66	1	10056	100550000	100560000	0	0	0	0	0	0	0	0	4	0	0	0	0	0	0	0	0	0	7.30607e-05	0	0	0	0	0	0	0	2.62955e-06	0	0	0	2.62955e-06	0	0	0	0	0	0	0	0	0	0	0	0	0	0
67	1	10057	100560000	100570000	0	0	0	0	0	0	1	0	0	0	0	0	0	0	0	0	1.16649e-05	0	0	0	0	0	0	0	0	0	0	0	6.11658e-07	0	6.11658e-07	0	0	0	0	0	0	0	0	0	0	0	0	0	0
68	1	10058	100570000	100580000	0	0	0	1	0	1	0	1	0	0	0	0	0	5.21118e-06	0	1.39678e-05	0	2.0859e-05	0	0	0	0	0	0	0	3.59838e-06	0	5.17889e-07	0	1.35575e-06	5.47202e-06	0	0	0	0	0	0	0	0	0	0	0	0	0	0
69	1	10059	100580000	100590000	0	0	0	0	0	0	0	0	0	0	0	0	0	0	0	0	0	0	0	0	0	0	0	0	0	0	0	0	0	0	0	0	0	0	0	0	0	0	0	0	0	0	0	0	0
70	1	1006	10050000	10060000	0	0	0	0	0	0	0	0	0	0	0	0	0	0	0	0	0	0	0	0	0	0	0	0	0	0	0	0	0	0	0	0	0	0	0	0	0	0	0	0	0	0	0	0	0
71	1	10060	100590000	100600000	0	0	0	0	0	0	0	0	0	0	0	0	0	0	0	0	0	0	0	0	0	0	0	0	0	0	0	0	0	0	0	0	0	0	0	0	0	0	0	0	0	0	0	0	0
72	1	10061	100600000	100610000	0	0	0	0	0	0	0	0	0	0	0	0	0	0	0	0	0	0	0	0	0	0	0	0	0	0	0	0	0	0	0	0	0	0	0	0	0	0	0	0	0	0	0	0	0
73	1	10062	100610000	100620000	0	0	0	1	0	0	3	0	0	0	0	0	0	5.21118e-06	0	0	3.49948e-05	0	0	0	0	0	0	0	0	0	0	0	1.83497e-06	1.35575e-06	3.19072e-06	0	0	0	0	0	0	0	0	0	0	0	0	0	0
74	1	10063	100620000	100630000	0	0	0	1	0	0	3	0	0	0	0	0	0	5.21118e-06	0	0	3.49948e-05	0	0	0	0	0	0	0	0	0	0	0	1.83497e-06	1.35575e-06	3.19072e-06	0	0	0	0	0	0	0	0	0	0	0	0	0	0
75	1	10064	100630000	100640000	0	0	0	0	1	0	1	0	0	0	0	0	0	0	4.48209e-05	0	1.16649e-05	0	0	0	0	0	0	0	5.43748e-06	0	0	0	6.11658e-07	0	6.04913e-06	0	0	0	0	0	0	0	0	0	0	0	0	0	0
76	1	10065	100640000	100650000	0	0	0	1	0	0	0	8	0	0	0	0	0	5.21118e-06	0	0	0	0.000166872	0	0	0	0	0	0	0	2.87871e-05	0	0	0	1.35575e-06	3.01428e-05	0	0	0	0	0	0	0	0	0	0	0	0	0	0
77	1	10066	100650000	100660000	0	0	0	0	0	0	0	0	0	0	0	0	0	0	0	0	0	0	0	0	0	0	0	0	0	0	0	0	0	0	0	0	0	0	0	0	0	0	0	0	0	0	0	0	0
78	1	10067	100660000	100670000	0	0	0	0	0	0	0	0	0	0	0	0	0	0	0	0	0	0	0	0	0	0	0	0	0	0	0	0	0	0	0	0	0	0	0	0	0	0	0	0	0	0	0	0	0
79	1	10068	100670000	100680000	0	0	0	0	1	1	0	0	0	0	0	0	0	0	4.48209e-05	1.39678e-05	0	0	0	0	0	0	0	0	5.43748e-06	0	0	5.17889e-07	0	0	5.95537e-06	0	0	0	0	0	0	0	0	0	0	0	0	0	0
80	1	10069	100680000	100690000	0	0	0	0	0	1	0	0	0	0	0	0	0	0	0	1.39678e-05	0	0	0	0	0	0	0	0	0	0	0	5.17889e-07	0	0	5.17889e-07	0	0	0	0	0	0	0	0	0	0	0	0	0	0
81	1	1007	10060000	10070000	0	0	0	0	0	0	0	0	0	0	0	0	0	0	0	0	0	0	0	0	0	0	0	0	0	0	0	0	0	0	0	0	0	0	0	0	0	0	0	0	0	0	0	0	0
82	1	10070	100690000	100700000	0	0	0	0	0	0	0	0	0	0	0	0	0	0	0	0	0	0	0	0	0	0	0	0	0	0	0	0	0	0	0	0	0	0	0	0	0	0	0	0	0	0	0	0	0
83	1	10071	100700000	100710000	0	0	0	0	0	0	0	0	0	0	0	0	0	0	0	0	0	0	0	0	0	0	0	0	0	0	0	0	0	0	0	0	0	0	0	0	0	0	0	0	0	0	0	0	0
84	1	10072	100710000	100720000	0	0	0	0	0	0	2	0	0	0	0	0	0	0	0	0	2.33299e-05	0	0	0	0	0	0	0	0	0	0	0	1.22332e-06	0	1.22332e-06	0	0	0	0	0	0	0	0	0	0	0	0	0	0
85	1	10073	100720000	100730000	0	0	0	0	0	0	0	0	0	0	0	0	0	0	0	0	0	0	0	0	0	0	0	0	0	0	0	0	0	0	0	0	0	0	0	0	0	0	0	0	0	0	0	0	0
86	1	10074	100730000	100740000	0	0	0	0	0	0	2	0	0	0	0	0	0	0	0	0	2.33299e-05	0	0	0	0	0	0	0	0	0	0	0	1.22332e-06	0	1.22332e-06	0	0	0	0	0	0	0	0	0	0	0	0	0	0
87	1	10075	100740000	100750000	0	0	0	0	0	0	0	0	0	0	0	0	0	0	0	0	0	0	0	0	0	0	0	0	0	0	0	0	0	0	0	0	0	0	0	0	0	0	0	0	0	0	0	0	0
88	1	10076	100750000	100760000	0	0	0	0	0	0	2	0	0	0	0	0	0	0	0	0	2.33299e-05	0	0	0	0	0	0	0	0	0	0	0	1.22332e-06	0	1.22332e-06	0	0	0	0	0	0	0	0	0	0	0	0	0	0
89	1	10077	100760000	100770000	0	0	0	0	1	0	0	0	0	2	0	0	0	0	4.48209e-05	0	0	0	0	0.000294898	0	0	0	3.87952e-05	5.43748e-06	0	0	0	0	0	4.42327e-05	0	0	0	0	0	0	0	0	0	0	0	0	0	0
90	1	10078	100770000	100780000	0	0	0	5	1	0	4	0	0	0	0	0	0	2.60559e-05	4.48209e-05	0	4.66597e-05	0	0	0	0	0	0	0	5.43748e-06	0	0	0	2.44663e-06	6.77874e-06	1.46629e-05	0	0	0	0	0	0	0	0	0	0	0	0	0	0
91	1	10079	100780000	100790000	0	0	0	2	0	0	0	1	0	0	0	0	0	1.04224e-05	0	0	0	2.0859e-05	0	0	0	0	0	0	0	3.59838e-06	0	0	0	2.7115e-06	6.30988e-06	0	0	0	0	0	0	0	0	0	0	0	0	0	0
92	1	1008	10070000	10080000	0	0	0	0	0	0	1	0	2	0	0	0	0	0	0	0	1.16649e-05	0	3.65303e-05	0	0	0	0	0	0	0	1.31478e-06	0	6.11658e-07	0	1.92643e-06	0	0	0	0	0	0	0	0	0	0	0	0	0	0
93	1	10080	100790000	100800000	0	0	0	0	0	0	2	0	0	0	0	0	0	0	0	0	2.33299e-05	0	0	0	0	0	0	0	0	0	0	0	1.22332e-06	0	1.22332e-06	0	0	0	0	0	0	0	0	0	0	0	0	0	0
94	1	10081	100800000	100810000	0	0	0	0	0	0	0	0	0	0	0	0	0	0	0	0	0	0	0	0	0	0	0	0	0	0	0	0	0	0	0	0	0	0	0	0	0	0	0	0	0	0	0	0	0
95	1	10082	100810000	100820000	0	0	0	0	0	0	0	0	0	0	0	0	0	0	0	0	0	0	0	0	0	0	0	0	0	0	0	0	0	0	0	0	0	0	0	0	0	0	0	0	0	0	0	0	0
96	1	10083	100820000	100830000	0	0	0	0	0	0	0	0	0	0	0	0	0	0	0	0	0	0	0	0	0	0	0	0	0	0	0	0	0	0	0	0	0	0	0	0	0	0	0	0	0	0	0	0	0
97	1	10084	100830000	100840000	0	0	0	0	0	0	0	0	0	0	0	0	0	0	0	0	0	0	0	0	0	0	0	0	0	0	0	0	0	0	0	0	0	0	0	0	0	0	0	0	0	0	0	0	0
98	1	10085	100840000	100850000	0	0	0	0	0	0	0	0	0	0	0	0	0	0	0	0	0	0	0	0	0	0	0	0	0	0	0	0	0	0	0	0	0	0	0	0	0	0	0	0	0	0	0	0	0
99	1	10086	100850000	100860000	0	0	0	0	1	0	0	0	0	0	0	0	0	0	4.48209e-05	0	0	0	0	0	0	0	0	0	5.43748e-06	0	0	0	0	0	5.43748e-06	0	0	0	0	0	0	0	0	0	0	0	0	0	0
100	1	10087	100860000	100870000	0	0	0	2	0	0	0	0	0	0	0	0	0	1.04224e-05	0	0	0	0	0	0	0	0	0	0	0	0	0	0	0	2.7115e-06	2.7115e-06	0	0	0	0	0	0	0	0	0	0	0	0	0	0
101	1	10088	100870000	100880000	0	0	0	2	0	0	0	0	0	0	0	0	0	1.04224e-05	0	0	0	0	0	0	0	0	0	0	0	0	0	0	0	2.7115e-06	2.7115e-06	0	0	0	0	0	0	0	0	0	0	0	0	0	0
102	1	10089	100880000	100890000	0	0	0	0	0	0	0	0	0	0	0	0	0	0	0	0	0	0	0	0	0	0	0	0	0	0	0	0	0	0	0	0	0	0	0	0	0	0	0	0	0	0	0	0	0
103	1	1009	10080000	10090000	0	0	0	0	0	0	4	0	0	0	0	0	0	0	0	0	4.66597e-05	0	0	0	0	0	0	0	0	0	0	0	2.44663e-06	0	2.44663e-06	0	0	0	0	0	0	0	0	0	0	0	0	0	0
104	1	10090	100890000	100900000	0	0	0	0	0	0	0	0	0	0	0	0	0	0	0	0	0	0	0	0	0	0	0	0	0	0	0	0	0	0	0	0	0	0	0	0	0	0	0	0	0	0	0	0	0
105	1	10091	100900000	100910000	0	0	0	2	0	0	0	0	0	0	0	0	0	1.04224e-05	0	0	0	0	0	0	0	0	0	0	0	0	0	0	0	2.7115e-06	2.7115e-06	0	0	0	0	0	0	0	0	0	0	0	0	0	0
106	1	10092	100910000	100920000	0	0	0	2	1	1	0	0	0	0	0	0	0	1.04224e-05	4.48209e-05	1.39678e-05	0	0	0	0	0	0	0	0	5.43748e-06	0	0	5.17889e-07	0	2.7115e-06	8.66686e-06	0	0	0	0	0	0	0	0	0	0	0	0	0	0
107	1	10093	100920000	100930000	0	0	0	0	0	1	0	0	0	0	0	0	0	0	0	1.39678e-05	0	0	0	0	0	0	0	0	0	0	0	5.17889e-07	0	0	5.17889e-07	0	0	0	0	0	0	0	0	0	0	0	0	0	0
108	1	10094	100930000	100940000	0	0	0	0	0	0	0	0	0	0	0	0	0	0	0	0	0	0	0	0	0	0	0	0	0	0	0	0	0	0	0	0	0	0	0	0	0	0	0	0	0	0	0	0	0
109	1	10095	100940000	100950000	0	0	0	0	1	6	0	0	0	0	0	0	0	0	4.48209e-05	8.38071e-05	0	0	0	0	0	0	0	0	5.43748e-06	0	0	3.10734e-06	0	0	8.54481e-06	0	0	0	0	0	0	0	0	0	0	0	0	0	0
110	1	10096	100950000	100960000	0	0	0	1	0	0	2	0	0	0	0	0	0	5.21118e-06	0	0	2.33299e-05	0	0	0	0	0	0	0	0	0	0	0	1.22332e-06	1.35575e-06	2.57906e-06	0	0	0	0	0	0	0	0	0	0	0	0	0	0
111	1	10097	100960000	100970000	0	0	0	0	0	0	0	0	0	0	0	0	0	0	0	0	0	0	0	0	0	0	0	0	0	0	0	0	0	0	0	0	0	0	0	0	0	0	0	0	0	0	0	0	0
112	1	10098	100970000	100980000	0	0	0	0	0	0	0	0	0	0	0	0	0	0	0	0	0	0	0	0	0	0	0	0	0	0	0	0	0	0	0	0	0	0	0	0	0	0	0	0	0	0	0	0	0
113	1	10099	100980000	100990000	0	0	0	0	0	2	0	0	0	0	0	0	0	0	0	2.79357e-05	0	0	0	0	0	0	0	0	0	0	0	1.03578e-06	0	0	1.03578e-06	0	0	0	0	0	0	0	0	0	0	0	0	0	0
114	1	101	1000000	1010000	0	0	0	0	0	0	1	0	1	0	0	0	0	0	0	0	1.16649e-05	0	1.82652e-05	0	0	0	0	0	0	0	6.57388e-07	0	6.11658e-07	0	1.26905e-06	0	0	0	0	0	0	0	0	0	0	0	0	0	0
115	1	1010	10090000	10100000	0	0	0	1	0	0	1	0	0	0	0	0	0	5.21118e-06	0	0	1.16649e-05	0	0	0	0	0	0	0	0	0	0	0	6.11658e-07	1.35575e-06	1.96741e-06	0	0	0	0	0	0	0	0	0	0	0	0	0	0
116	1	10100	100990000	101000000	0	0	0	0	0	0	1	0	0	0	0	0	0	0	0	0	1.16649e-05	0	0	0	0	0	0	0	0	0	0	0	6.11658e-07	0	6.11658e-07	0	0	0	0	0	0	0	0	0	0	0	0	0	0
117	1	10101	101000000	101010000	0	0	0	1	0	1	1	0	0	0	0	0	0	5.21118e-06	0	1.39678e-05	1.16649e-05	0	0	0	0	0	0	0	0	0	0	5.17889e-07	6.11658e-07	1.35575e-06	2.4853e-06	0	0	0	0	0	0	0	0	0	0	0	0	0	0
118	1	10102	101010000	101020000	0	0	0	0	0	0	3	0	0	0	0	0	0	0	0	0	3.49948e-05	0	0	0	0	0	0	0	0	0	0	0	1.83497e-06	0	1.83497e-06	0	0	0	0	0	0	0	0	0	0	0	0	0	0
119	1	10103	101020000	101030000	0	0	0	1	0	0	0	0	0	0	0	0	0	5.21118e-06	0	0	0	0	0	0	0	0	0	0	0	0	0	0	0	1.35575e-06	1.35575e-06	0	0	0	0	0	0	0	0	0	0	0	0	0	0
120	1	10104	101030000	101040000	0	0	0	1	0	1	0	1	0	0	0	0	0	5.21118e-06	0	1.39678e-05	0	2.0859e-05	0	0	0	0	0	0	0	3.59838e-06	0	5.17889e-07	0	1.35575e-06	5.47202e-06	0	0	0	0	0	0	0	0	0	0	0	0	0	0
121	1	10105	101040000	101050000	0	0	0	2	0	0	0	0	0	0	0	0	0	1.04224e-05	0	0	0	0	0	0	0	0	0	0	0	0	0	0	0	2.7115e-06	2.7115e-06	0	0	0	0	0	0	0	0	0	0	0	0	0	0
122	1	10106	101050000	101060000	0	0	0	0	1	0	0	0	0	0	0	0	0	0	4.48209e-05	0	0	0	0	0	0	0	0	0	5.43748e-06	0	0	0	0	0	5.43748e-06	0	0	0	0	0	0	0	0	0	0	0	0	0	0
123	1	10107	101060000	101070000	0	0	0	0	0	0	0	0	0	0	0	0	0	0	0	0	0	0	0	0	0	0	0	0	0	0	0	0	0	0	0	0	0	0	0	0	0	0	0	0	0	0	0	0	0
124	1	10108	101070000	101080000	0	0	0	0	0	0	0	0	0	0	0	0	0	0	0	0	0	0	0	0	0	0	0	0	0	0	0	0	0	0	0	0	0	0	0	0	0	0	0	0	0	0	0	0	0
125	1	10109	101080000	101090000	0	0	0	0	0	0	0	0	0	0	0	0	0	0	0	0	0	0	0	0	0	0	0	0	0	0	0	0	0	0	0	0	0	0	0	0	0	0	0	0	0	0	0	0	0
126	1	1011	10100000	10110000	0	0	0	0	1	0	2	0	0	0	0	0	0	0	4.48209e-05	0	2.33299e-05	0	0	0	0	0	0	0	5.43748e-06	0	0	0	1.22332e-06	0	6.66079e-06	0	0	0	0	0	0	0	0	0	0	0	0	0	0
127	1	10110	101090000	101100000	0	0	0	0	0	0	0	0	0	0	0	0	0	0	0	0	0	0	0	0	0	0	0	0	0	0	0	0	0	0	0	0	0	0	0	0	0	0	0	0	0	0	0	0	0
128	1	10111	101100000	101110000	0	0	0	0	0	0	1	0	0	0	0	0	0	0	0	0	1.16649e-05	0	0	0	0	0	0	0	0	0	0	0	6.11658e-07	0	6.11658e-07	0	0	0	0	0	0	0	0	0	0	0	0	0	0
129	1	10112	101110000	101120000	0	0	0	0	0	0	0	0	0	0	0	0	0	0	0	0	0	0	0	0	0	0	0	0	0	0	0	0	0	0	0	0	0	0	0	0	0	0	0	0	0	0	0	0	0
130	1	10113	101120000	101130000	0	0	0	0	0	0	1	0	0	0	0	0	0	0	0	0	1.16649e-05	0	0	0	0	0	0	0	0	0	0	0	6.11658e-07	0	6.11658e-07	0	0	0	0	0	0	0	0	0	0	0	0	0	0
131	1	10114	101130000	101140000	0	0	0	0	0	0	0	0	0	0	0	0	0	0	0	0	0	0	0	0	0	0	0	0	0	0	0	0	0	0	0	0	0	0	0	0	0	0	0	0	0	0	0	0	0
132	1	10115	101140000	101150000	0	0	0	0	0	1	0	0	0	0	0	0	0	0	0	1.39678e-05	0	0	0	0	0	0	0	0	0	0	0	5.17889e-07	0	0	5.17889e-07	0	0	0	0	0	0	0	0	0	0	0	0	0	0
133	1	10116	101150000	101160000	0	0	0	0	0	0	0	0	0	0	0	0	0	0	0	0	0	0	0	0	0	0	0	0	0	0	0	0	0	0	0	0	0	0	0	0	0	0	0	0	0	0	0	0	0
134	1	10117	101160000	101170000	0	0	0	2	0	0	0	0	0	0	0	0	0	1.04224e-05	0	0	0	0	0	0	0	0	0	0	0	0	0	0	0	2.7115e-06	2.7115e-06	0	0	0	0	0	0	0	0	0	0	0	0	0	0
135	1	10118	101170000	101180000	0	0	0	0	0	1	0	0	0	0	0	0	0	0	0	1.39678e-05	0	0	0	0	0	0	0	0	0	0	0	5.17889e-07	0	0	5.17889e-07	0	0	0	0	0	0	0	0	0	0	0	0	0	0
136	1	10119	101180000	101190000	0	0	0	1	0	0	0	0	0	0	0	0	0	5.21118e-06	0	0	0	0	0	0	0	0	0	0	0	0	0	0	0	1.35575e-06	1.35575e-06	0	0	0	0	0	0	0	0	0	0	0	0	0	0
137	1	1012	10110000	10120000	0	0	0	0	0	2	0	0	0	0	0	0	0	0	0	2.79357e-05	0	0	0	0	0	0	0	0	0	0	0	1.03578e-06	0	0	1.03578e-06	0	0	0	0	0	0	0	0	0	0	0	0	0	0
138	1	10120	101190000	101200000	0	0	0	0	0	0	0	0	0	0	0	0	0	0	0	0	0	0	0	0	0	0	0	0	0	0	0	0	0	0	0	0	0	0	0	0	0	0	0	0	0	0	0	0	0
139	1	10121	101200000	101210000	0	0	0	0	0	0	0	0	0	0	0	0	0	0	0	0	0	0	0	0	0	0	0	0	0	0	0	0	0	0	0	0	0	0	0	0	0	0	0	0	0	0	0	0	0
140	1	10122	101210000	101220000	0	0	0	1	0	0	0	1	0	0	0	0	0	5.21118e-06	0	0	0	2.0859e-05	0	0	0	0	0	0	0	3.59838e-06	0	0	0	1.35575e-06	4.95413e-06	0	0	0	0	0	0	0	0	0	0	0	0	0	0
141	1	10123	101220000	101230000	0	0	0	0	0	0	0	0	0	0	0	0	0	0	0	0	0	0	0	0	0	0	0	0	0	0	0	0	0	0	0	0	0	0	0	0	0	0	0	0	0	0	0	0	0
142	1	10124	101230000	101240000	0	0	0	0	0	1	0	0	0	0	0	0	0	0	0	1.39678e-05	0	0	0	0	0	0	0	0	0	0	0	5.17889e-07	0	0	5.17889e-07	0	0	0	0	0	0	0	0	0	0	0	0	0	0
143	1	10125	101240000	101250000	0	0	0	1	0	1	0	0	0	0	0	0	0	5.21118e-06	0	1.39678e-05	0	0	0	0	0	0	0	0	0	0	0	5.17889e-07	0	1.35575e-06	1.87364e-06	0	0	0	0	0	0	0	0	0	0	0	0	0	0
144	1	10126	101250000	101260000	0	0	0	0	0	0	0	0	0	0	0	0	0	0	0	0	0	0	0	0	0	0	0	0	0	0	0	0	0	0	0	0	0	0	0	0	0	0	0	0	0	0	0	0	0
145	1	10127	101260000	101270000	0	0	0	0	0	0	0	0	0	0	0	0	0	0	0	0	0	0	0	0	0	0	0	0	0	0	0	0	0	0	0	0	0	0	0	0	0	0	0	0	0	0	0	0	0
146	1	10128	101270000	101280000	0	0	0	0	0	0	0	0	0	0	0	0	0	0	0	0	0	0	0	0	0	0	0	0	0	0	0	0	0	0	0	0	0	0	0	0	0	0	0	0	0	0	0	0	0
147	1	10129	101280000	101290000	0	0	0	1	0	0	0	0	0	0	0	0	0	5.21118e-06	0	0	0	0	0	0	0	0	0	0	0	0	0	0	0	1.35575e-06	1.35575e-06	0	0	0	0	0	0	0	0	0	0	0	0	0	0
148	1	1013	10120000	10130000	0	0	0	0	0	0	0	0	0	0	0	0	0	0	0	0	0	0	0	0	0	0	0	0	0	0	0	0	0	0	0	0	0	0	0	0	0	0	0	0	0	0	0	0	0
149	1	10130	101290000	101300000	0	0	0	0	0	0	0	0	0	0	0	0	0	0	0	0	0	0	0	0	0	0	0	0	0	0	0	0	0	0	0	0	0	0	0	0	0	0	0	0	0	0	0	0	0
150	1	10131	101300000	101310000	0	0	0	0	0	2	1	0	0	0	0	0	0	0	0	2.79357e-05	1.16649e-05	0	0	0	0	0	0	0	0	0	0	1.03578e-06	6.11658e-07	0	1.64744e-06	0	0	0	0	0	0	0	0	0	0	0	0	0	0
151	1	10132	101310000	101320000	0	0	0	0	0	1	0	0	0	0	0	0	0	0	0	1.39678e-05	0	0	0	0	0	0	0	0	0	0	0	5.17889e-07	0	0	5.17889e-07	0	0	0	0	0	0	0	0	0	0	0	0	0	0
152	1	10133	101320000	101330000	0	0	0	0	1	0	1	0	0	0	0	0	0	0	4.48209e-05	0	1.16649e-05	0	0	0	0	0	0	0	5.43748e-06	0	0	0	6.11658e-07	0	6.04913e-06	0	0	0	0	0	0	0	0	0	0	0	0	0	0
153	1	10134	101330000	101340000	0	0	0	1	1	0	2	1	0	0	0	0	0	5.21118e-06	4.48209e-05	0	2.33299e-05	2.0859e-05	0	0	0	0	0	0	5.43748e-06	3.59838e-06	0	0	1.22332e-06	1.35575e-06	1.16149e-05	0	0	0	0	0	0	0	0	0	0	0	0	0	0
154	1	10135	101340000	101350000	0	0	0	2	0	0	0	0	0	0	0	0	0	1.04224e-05	0	0	0	0	0	0	0	0	0	0	0	0	0	0	0	2.7115e-06	2.7115e-06	0	0	0	0	0	0	0	0	0	0	0	0	0	0
155	1	10136	101350000	101360000	0	0	0	3	0	0	0	1	0	0	0	0	0	1.56335e-05	0	0	0	2.0859e-05	0	0	0	0	0	0	0	3.59838e-06	0	0	0	4.06725e-06	7.66563e-06	0	0	0	0	0	0	0	0	0	0	0	0	0	0
156	1	10137	101360000	101370000	0	0	0	1	0	0	0	1	0	0	0	0	0	5.21118e-06	0	0	0	2.0859e-05	0	0	0	0	0	0	0	3.59838e-06	0	0	0	1.35575e-06	4.95413e-06	0	0	0	0	0	0	0	0	0	0	0	0	0	0
157	1	10138	101370000	101380000	0	0	0	2	0	0	1	0	0	0	0	0	0	1.04224e-05	0	0	1.16649e-05	0	0	0	0	0	0	0	0	0	0	0	6.11658e-07	2.7115e-06	3.32315e-06	0	0	0	0	0	0	0	0	0	0	0	0	0	0
158	1	10139	101380000	101390000	0	0	0	2	0	0	0	0	0	0	0	0	0	1.04224e-05	0	0	0	0	0	0	0	0	0	0	0	0	0	0	0	2.7115e-06	2.7115e-06	0	0	0	0	0	0	0	0	0	0	0	0	0	0
159	1	1014	10130000	10140000	0	0	0	0	0	0	0	0	0	0	0	0	0	0	0	0	0	0	0	0	0	0	0	0	0	0	0	0	0	0	0	0	0	0	0	0	0	0	0	0	0	0	0	0	0
160	1	10140	101390000	101400000	0	0	0	0	0	0	1	0	0	0	0	0	0	0	0	0	1.16649e-05	0	0	0	0	0	0	0	0	0	0	0	6.11658e-07	0	6.11658e-07	0	0	0	0	0	0	0	0	0	0	0	0	0	0
161	1	10141	101400000	101410000	0	0	0	0	0	0	3	0	0	0	0	0	0	0	0	0	3.49948e-05	0	0	0	0	0	0	0	0	0	0	0	1.83497e-06	0	1.83497e-06	0	0	0	0	0	0	0	0	0	0	0	0	0	0
162	1	10142	101410000	101420000	0	0	0	1	0	0	0	0	0	0	0	0	0	5.21118e-06	0	0	0	0	0	0	0	0	0	0	0	0	0	0	0	1.35575e-06	1.35575e-06	0	0	0	0	0	0	0	0	0	0	0	0	0	0
163	1	10143	101420000	101430000	0	0	0	0	0	0	0	0	0	0	0	0	0	0	0	0	0	0	0	0	0	0	0	0	0	0	0	0	0	0	0	0	0	0	0	0	0	0	0	0	0	0	0	0	0
164	1	10144	101430000	101440000	0	0	0	0	0	1	0	0	0	0	0	0	0	0	0	1.39678e-05	0	0	0	0	0	0	0	0	0	0	0	5.17889e-07	0	0	5.17889e-07	0	0	0	0	0	0	0	0	0	0	0	0	0	0
165	1	10145	101440000	101450000	0	0	0	0	0	0	0	0	0	0	0	0	0	0	0	0	0	0	0	0	0	0	0	0	0	0	0	0	0	0	0	0	0	0	0	0	0	0	0	0	0	0	0	0	0
166	1	10146	101450000	101460000	0	0	0	3	0	0	0	0	0	0	0	0	0	1.56335e-05	0	0	0	0	0	0	0	0	0	0	0	0	0	0	0	4.06725e-06	4.06725e-06	0	0	0	0	0	0	0	0	0	0	0	0	0	0
167	1	10147	101460000	101470000	0	0	0	0	0	0	0	0	0	0	0	0	0	0	0	0	0	0	0	0	0	0	0	0	0	0	0	0	0	0	0	0	0	0	0	0	0	0	0	0	0	0	0	0	0
168	1	10148	101470000	101480000	0	0	0	0	0	0	0	0	0	0	0	0	0	0	0	0	0	0	0	0	0	0	0	0	0	0	0	0	0	0	0	0	0	0	0	0	0	0	0	0	0	0	0	0	0
169	1	10149	101480000	101490000	0	0	0	0	0	0	0	0	0	0	0	0	0	0	0	0	0	0	0	0	0	0	0	0	0	0	0	0	0	0	0	0	0	0	0	0	0	0	0	0	0	0	0	0	0
170	1	1015	10140000	10150000	0	0	0	0	0	0	0	0	0	0	0	0	0	0	0	0	0	0	0	0	0	0	0	0	0	0	0	0	0	0	0	0	0	0	0	0	0	0	0	0	0	0	0	0	0
171	1	10150	101490000	101500000	0	0	0	4	0	0	0	0	2	0	0	0	0	2.08447e-05	0	0	0	0	3.65303e-05	0	0	0	0	0	0	0	1.31478e-06	0	0	5.42299e-06	6.73777e-06	0	0	0	0	0	0	0	0	0	0	0	0	0	0
172	1	10151	101500000	101510000	0	0	0	0	0	0	0	0	0	0	0	0	0	0	0	0	0	0	0	0	0	0	0	0	0	0	0	0	0	0	0	0	0	0	0	0	0	0	0	0	0	0	0	0	0
173	1	10152	101510000	101520000	0	0	0	0	0	0	0	0	0	0	0	0	0	0	0	0	0	0	0	0	0	0	0	0	0	0	0	0	0	0	0	0	0	0	0	0	0	0	0	0	0	0	0	0	0
174	1	10153	101520000	101530000	0	0	0	2	0	0	0	0	0	0	0	0	0	1.04224e-05	0	0	0	0	0	0	0	0	0	0	0	0	0	0	0	2.7115e-06	2.7115e-06	0	0	0	0	0	0	0	0	0	0	0	0	0	0
175	1	10154	101530000	101540000	0	0	0	1	0	0	0	0	0	0	0	0	0	5.21118e-06	0	0	0	0	0	0	0	0	0	0	0	0	0	0	0	1.35575e-06	1.35575e-06	0	0	0	0	0	0	0	0	0	0	0	0	0	0
176	1	10155	101540000	101550000	0	0	0	1	0	0	2	0	0	0	0	0	0	5.21118e-06	0	0	2.33299e-05	0	0	0	0	0	0	0	0	0	0	0	1.22332e-06	1.35575e-06	2.57906e-06	0	0	0	0	0	0	0	0	0	0	0	0	0	0
177	1	10156	101550000	101560000	0	0	0	1	0	0	0	0	0	0	0	0	0	5.21118e-06	0	0	0	0	0	0	0	0	0	0	0	0	0	0	0	1.35575e-06	1.35575e-06	0	0	0	0	0	0	0	0	0	0	0	0	0	0
178	1	10157	101560000	101570000	0	0	0	0	0	2	1	0	0	0	0	0	0	0	0	2.79357e-05	1.16649e-05	0	0	0	0	0	0	0	0	0	0	1.03578e-06	6.11658e-07	0	1.64744e-06	0	0	0	0	0	0	0	0	0	0	0	0	0	0
179	1	10158	101570000	101580000	0	0	0	1	0	0	0	0	0	0	0	0	0	5.21118e-06	0	0	0	0	0	0	0	0	0	0	0	0	0	0	0	1.35575e-06	1.35575e-06	0	0	0	0	0	0	0	0	0	0	0	0	0	0
180	1	10159	101580000	101590000	0	0	0	2	0	0	0	0	0	0	0	0	0	1.04224e-05	0	0	0	0	0	0	0	0	0	0	0	0	0	0	0	2.7115e-06	2.7115e-06	0	0	0	0	0	0	0	0	0	0	0	0	0	0
181	1	1016	10150000	10160000	0	0	0	2	0	0	1	0	0	0	0	0	0	1.04224e-05	0	0	1.16649e-05	0	0	0	0	0	0	0	0	0	0	0	6.11658e-07	2.7115e-06	3.32315e-06	0	0	0	0	0	0	0	0	0	0	0	0	0	0
182	1	10160	101590000	101600000	0	0	0	3	0	2	0	5	1	0	0	0	0	1.56335e-05	0	2.79357e-05	0	0.000104295	1.82652e-05	0	0	0	0	0	0	1.79919e-05	6.57388e-07	1.03578e-06	0	4.06725e-06	2.37523e-05	0	0	0	0	0	0	0	0	0	0	0	0	0	0
183	1	10161	101600000	101610000	0	0	0	0	0	2	0	0	1	0	0	0	0	0	0	2.79357e-05	0	0	1.82652e-05	0	0	0	0	0	0	0	6.57388e-07	1.03578e-06	0	0	1.69317e-06	0	0	0	0	0	0	0	0	0	0	0	0	0	0
184	1	10162	101610000	101620000	0	0	0	0	0	0	0	0	0	0	0	0	0	0	0	0	0	0	0	0	0	0	0	0	0	0	0	0	0	0	0	0	0	0	0	0	0	0	0	0	0	0	0	0	0
185	1	10163	101620000	101630000	0	0	0	0	0	0	0	0	0	0	0	0	0	0	0	0	0	0	0	0	0	0	0	0	0	0	0	0	0	0	0	0	0	0	0	0	0	0	0	0	0	0	0	0	0
186	1	10164	101630000	101640000	0	0	0	0	0	0	0	0	0	0	0	0	0	0	0	0	0	0	0	0	0	0	0	0	0	0	0	0	0	0	0	0	0	0	0	0	0	0	0	0	0	0	0	0	0
187	1	10165	101640000	101650000	0	0	0	0	0	0	0	0	0	0	0	0	0	0	0	0	0	0	0	0	0	0	0	0	0	0	0	0	0	0	0	0	0	0	0	0	0	0	0	0	0	0	0	0	0
188	1	10166	101650000	101660000	0	0	0	0	0	2	0	0	0	0	0	0	0	0	0	2.79357e-05	0	0	0	0	0	0	0	0	0	0	0	1.03578e-06	0	0	1.03578e-06	0	0	0	0	0	0	0	0	0	0	0	0	0	0
189	1	10167	101660000	101670000	0	0	0	0	0	0	0	0	0	0	0	0	0	0	0	0	0	0	0	0	0	0	0	0	0	0	0	0	0	0	0	0	0	0	0	0	0	0	0	0	0	0	0	0	0
190	1	10168	101670000	101680000	0	0	0	0	0	0	0	0	0	0	0	0	0	0	0	0	0	0	0	0	0	0	0	0	0	0	0	0	0	0	0	0	0	0	0	0	0	0	0	0	0	0	0	0	0
191	1	10169	101680000	101690000	0	0	0	0	1	0	0	0	1	0	0	0	0	0	4.48209e-05	0	0	0	1.82652e-05	0	0	0	0	0	5.43748e-06	0	6.57388e-07	0	0	0	6.09486e-06	0	0	0	0	0	0	0	0	0	0	0	0	0	0
192	1	1017	10160000	10170000	0	0	0	0	0	0	1	0	0	0	0	0	0	0	0	0	1.16649e-05	0	0	0	0	0	0	0	0	0	0	0	6.11658e-07	0	6.11658e-07	0	0	0	0	0	0	0	0	0	0	0	0	0	0
193	1	10170	101690000	101700000	0	0	0	0	1	0	0	0	0	0	0	0	0	0	4.48209e-05	0	0	0	0	0	0	0	0	0	5.43748e-06	0	0	0	0	0	5.43748e-06	0	0	0	0	0	0	0	0	0	0	0	0	0	0
194	1	10171	101700000	101710000	0	0	0	0	0	0	0	0	0	0	0	0	0	0	0	0	0	0	0	0	0	0	0	0	0	0	0	0	0	0	0	0	0	0	0	0	0	0	0	0	0	0	0	0	0
195	1	10172	101710000	101720000	0	0	0	0	0	0	0	0	0	0	0	0	0	0	0	0	0	0	0	0	0	0	0	0	0	0	0	0	0	0	0	0	0	0	0	0	0	0	0	0	0	0	0	0	0
196	1	10173	101720000	101730000	0	0	0	0	0	0	0	0	0	0	0	0	0	0	0	0	0	0	0	0	0	0	0	0	0	0	0	0	0	0	0	0	0	0	0	0	0	0	0	0	0	0	0	0	0
197	1	10174	101730000	101740000	0	0	0	0	0	0	0	0	2	0	0	0	0	0	0	0	0	0	3.65303e-05	0	0	0	0	0	0	0	1.31478e-06	0	0	0	1.31478e-06	0	0	0	0	0	0	0	0	0	0	0	0	0	0
198	1	10175	101740000	101750000	0	0	0	0	0	0	0	1	0	0	0	0	0	0	0	0	0	2.0859e-05	0	0	0	0	0	0	0	3.59838e-06	0	0	0	0	3.59838e-06	0	0	0	0	0	0	0	0	0	0	0	0	0	0
199	1	10176	101750000	101760000	0	0	0	0	0	0	0	0	0	0	0	0	0	0	0	0	0	0	0	0	0	0	0	0	0	0	0	0	0	0	0	0	0	0	0	0	0	0	0	0	0	0	0	0	0
200	1	10177	101760000	101770000	0	0	0	1	0	0	1	1	0	0	0	0	0	5.21118e-06	0	0	1.16649e-05	2.0859e-05	0	0	0	0	0	0	0	3.59838e-06	0	0	6.11658e-07	1.35575e-06	5.56579e-06	0	0	0	0	0	0	0	0	0	0	0	0	0	0
201	1	10178	101770000	101780000	0	0	0	0	0	0	0	0	0	0	0	0	0	0	0	0	0	0	0	0	0	0	0	0	0	0	0	0	0	0	0	0	0	0	0	0	0	0	0	0	0	0	0	0	0
202	1	10179	101780000	101790000	0	0	0	1	0	0	0	0	0	0	0	0	0	5.21118e-06	0	0	0	0	0	0	0	0	0	0	0	0	0	0	0	1.35575e-06	1.35575e-06	0	0	0	0	0	0	0	0	0	0	0	0	0	0
203	1	1018	10170000	10180000	0	0	0	2	0	0	0	0	0	0	0	0	0	1.04224e-05	0	0	0	0	0	0	0	0	0	0	0	0	0	0	0	2.7115e-06	2.7115e-06	0	0	0	0	0	0	0	0	0	0	0	0	0	0
204	1	10180	101790000	101800000	0	0	0	0	0	0	0	0	0	0	0	0	0	0	0	0	0	0	0	0	0	0	0	0	0	0	0	0	0	0	0	0	0	0	0	0	0	0	0	0	0	0	0	0	0
205	1	10181	101800000	101810000	0	0	0	2	0	6	0	1	0	0	0	0	0	1.04224e-05	0	8.38071e-05	0	2.0859e-05	0	0	0	0	0	0	0	3.59838e-06	0	3.10734e-06	0	2.7115e-06	9.41722e-06	0	0	0	0	0	0	0	0	0	0	0	0	0	0
206	1	10182	101810000	101820000	0	0	0	0	0	0	0	0	0	0	0	0	0	0	0	0	0	0	0	0	0	0	0	0	0	0	0	0	0	0	0	0	0	0	0	0	0	0	0	0	0	0	0	0	0
207	1	10183	101820000	101830000	0	0	0	0	0	2	10	1	0	0	0	0	0	0	0	2.79357e-05	0.000116649	2.0859e-05	0	0	0	0	0	0	0	3.59838e-06	0	1.03578e-06	6.11658e-06	0	1.07507e-05	0	0	0	0	0	0	1	0	0	0	0	0	0	0
208	1	10184	101830000	101840000	0	0	0	0	0	0	0	0	0	0	0	0	0	0	0	0	0	0	0	0	0	0	0	0	0	0	0	0	0	0	0	0	0	0	0	0	0	0	0	0	0	0	0	0	0
209	1	10185	101840000	101850000	0	0	0	0	0	0	1	0	0	0	0	0	0	0	0	0	1.16649e-05	0	0	0	0	0	0	0	0	0	0	0	6.11658e-07	0	6.11658e-07	0	0	0	0	0	0	0	0	0	0	0	0	0	0
210	1	10186	101850000	101860000	0	0	0	0	0	0	0	0	0	0	0	0	0	0	0	0	0	0	0	0	0	0	0	0	0	0	0	0	0	0	0	0	0	0	0	0	0	0	0	0	0	0	0	0	0
211	1	10187	101860000	101870000	0	0	0	0	0	0	0	0	0	0	0	0	0	0	0	0	0	0	0	0	0	0	0	0	0	0	0	0	0	0	0	0	0	0	0	0	0	0	0	0	0	0	0	0	0
212	1	10188	101870000	101880000	0	0	0	1	0	3	0	0	0	0	0	0	0	5.21118e-06	0	4.19035e-05	0	0	0	0	0	0	0	0	0	0	0	1.55367e-06	0	1.35575e-06	2.90942e-06	0	0	0	0	0	0	0	0	0	0	0	0	0	0
213	1	10189	101880000	101890000	0	0	0	0	0	1	0	0	0	0	0	0	0	0	0	1.39678e-05	0	0	0	0	0	0	0	0	0	0	0	5.17889e-07	0	0	5.17889e-07	0	0	0	0	0	0	0	0	0	0	0	0	0	0
214	1	1019	10180000	10190000	0	0	0	0	0	0	0	0	0	0	0	0	0	0	0	0	0	0	0	0	0	0	0	0	0	0	0	0	0	0	0	0	0	0	0	0	0	0	0	0	0	0	0	0	0
215	1	10190	101890000	101900000	0	0	0	2	0	0	0	0	0	0	0	0	0	1.04224e-05	0	0	0	0	0	0	0	0	0	0	0	0	0	0	0	2.7115e-06	2.7115e-06	0	0	0	0	0	0	0	0	0	0	0	0	0	0
216	1	10191	101900000	101910000	0	0	0	1	0	0	0	0	0	0	0	0	0	5.21118e-06	0	0	0	0	0	0	0	0	0	0	0	0	0	0	0	1.35575e-06	1.35575e-06	0	0	0	0	0	0	0	0	0	0	0	0	0	0
217	1	10192	101910000	101920000	0	0	0	0	0	0	0	0	0	0	0	0	0	0	0	0	0	0	0	0	0	0	0	0	0	0	0	0	0	0	0	0	0	0	0	0	0	0	0	0	0	0	0	0	0
218	1	10193	101920000	101930000	0	0	0	0	0	0	0	0	0	0	0	0	0	0	0	0	0	0	0	0	0	0	0	0	0	0	0	0	0	0	0	0	0	0	0	0	0	0	0	0	0	0	0	0	0
219	1	10194	101930000	101940000	0	0	0	0	0	0	0	0	0	0	0	0	0	0	0	0	0	0	0	0	0	0	0	0	0	0	0	0	0	0	0	0	0	0	0	0	0	0	0	0	0	0	0	0	0
220	1	10195	101940000	101950000	0	0	0	1	0	0	0	0	0	1	0	0	0	5.21118e-06	0	0	0	0	0	0.000147449	0	0	0	1.93976e-05	0	0	0	0	0	1.35575e-06	2.07533e-05	0	0	0	0	0	0	0	0	0	0	0	0	0	0
221	1	10196	101950000	101960000	0	0	0	1	0	0	0	0	0	1	0	0	0	5.21118e-06	0	0	0	0	0	0.000147449	0	0	0	1.93976e-05	0	0	0	0	0	1.35575e-06	2.07533e-05	0	0	0	0	0	0	0	0	0	0	0	0	0	0
222	1	10197	101960000	101970000	0	0	0	0	0	0	0	0	0	0	0	0	0	0	0	0	0	0	0	0	0	0	0	0	0	0	0	0	0	0	0	0	0	0	0	0	0	0	0	0	0	0	0	0	0
223	1	10198	101970000	101980000	0	0	0	0	0	0	0	0	0	0	0	0	0	0	0	0	0	0	0	0	0	0	0	0	0	0	0	0	0	0	0	0	0	0	0	0	0	0	0	0	0	0	0	0	0
224	1	10199	101980000	101990000	0	0	0	4	0	0	0	0	0	0	0	0	0	2.08447e-05	0	0	0	0	0	0	0	0	0	0	0	0	0	0	0	5.42299e-06	5.42299e-06	0	0	0	0	0	0	0	0	0	0	0	0	0	0
225	1	102	1010000	1020000	0	0	0	0	0	1	0	0	0	0	0	0	0	0	0	1.39678e-05	0	0	0	0	0	0	0	0	0	0	0	5.17889e-07	0	0	5.17889e-07	0	0	0	0	0	0	0	0	0	0	0	0	0	0
226	1	1020	10190000	10200000	0	0	0	0	0	0	0	0	0	0	0	0	0	0	0	0	0	0	0	0	0	0	0	0	0	0	0	0	0	0	0	0	0	0	0	0	0	0	0	0	0	0	0	0	0
227	1	10200	101990000	102000000	0	0	0	0	0	0	0	0	0	0	0	0	0	0	0	0	0	0	0	0	0	0	0	0	0	0	0	0	0	0	0	0	0	0	0	0	0	0	0	0	0	0	0	0	0
228	1	10201	102000000	102010000	0	0	0	0	0	0	0	0	0	0	0	0	0	0	0	0	0	0	0	0	0	0	0	0	0	0	0	0	0	0	0	0	0	0	0	0	0	0	0	0	0	0	0	0	0
229	1	10202	102010000	102020000	0	0	0	0	0	1	3	0	0	0	0	0	0	0	0	1.39678e-05	3.49948e-05	0	0	0	0	0	0	0	0	0	0	5.17889e-07	1.83497e-06	0	2.35286e-06	0	0	0	0	0	0	0	0	0	0	0	0	0	0
230	1	10203	102020000	102030000	0	0	0	1	0	3	1	0	0	0	0	0	0	5.21118e-06	0	4.19035e-05	1.16649e-05	0	0	0	0	0	0	0	0	0	0	1.55367e-06	6.11658e-07	1.35575e-06	3.52107e-06	0	0	0	0	0	0	0	0	0	0	0	0	0	0
231	1	10204	102030000	102040000	0	0	0	2	0	0	0	0	2	0	0	0	0	1.04224e-05	0	0	0	0	3.65303e-05	0	0	0	0	0	0	0	1.31478e-06	0	0	2.7115e-06	4.02627e-06	0	0	0	0	0	0	0	0	0	0	0	0	0	0
232	1	10205	102040000	102050000	0	0	0	1	1	0	0	0	0	0	0	0	0	5.21118e-06	4.48209e-05	0	0	0	0	0	0	0	0	0	5.43748e-06	0	0	0	0	1.35575e-06	6.79323e-06	0	0	0	0	0	0	0	0	0	0	0	0	0	0
233	1	10206	102050000	102060000	0	0	0	1	0	0	0	0	0	0	0	0	0	5.21118e-06	0	0	0	0	0	0	0	0	0	0	0	0	0	0	0	1.35575e-06	1.35575e-06	0	0	0	0	0	0	0	0	0	0	0	0	0	0
234	1	10207	102060000	102070000	0	0	0	0	0	0	0	0	0	0	0	0	0	0	0	0	0	0	0	0	0	0	0	0	0	0	0	0	0	0	0	0	0	0	0	0	0	0	0	0	0	0	0	0	0
235	1	10208	102070000	102080000	0	0	0	0	0	1	0	0	0	0	0	0	0	0	0	1.39678e-05	0	0	0	0	0	0	0	0	0	0	0	5.17889e-07	0	0	5.17889e-07	0	0	0	0	0	0	0	0	0	0	0	0	0	0
236	1	10209	102080000	102090000	0	0	0	1	0	0	0	0	2	0	0	0	0	5.21118e-06	0	0	0	0	3.65303e-05	0	0	0	0	0	0	0	1.31478e-06	0	0	1.35575e-06	2.67052e-06	0	0	0	0	0	0	0	0	0	0	0	0	0	0
237	1	1021	10200000	10210000	0	0	0	0	0	0	0	0	0	0	0	0	0	0	0	0	0	0	0	0	0	0	0	0	0	0	0	0	0	0	0	0	0	0	0	0	0	0	0	0	0	0	0	0	0
238	1	10210	102090000	102100000	0	0	0	0	0	0	0	0	0	0	0	0	0	0	0	0	0	0	0	0	0	0	0	0	0	0	0	0	0	0	0	0	0	0	0	0	0	0	0	0	0	0	0	0	0
239	1	10211	102100000	102110000	0	0	0	1	0	0	0	0	0	0	0	0	0	5.21118e-06	0	0	0	0	0	0	0	0	0	0	0	0	0	0	0	1.35575e-06	1.35575e-06	0	0	0	0	0	0	0	0	0	0	0	0	0	0
240	1	10212	102110000	102120000	0	0	0	0	0	0	0	0	0	0	0	0	0	0	0	0	0	0	0	0	0	0	0	0	0	0	0	0	0	0	0	0	0	0	0	0	0	0	0	0	0	0	0	0	0
241	1	10213	102120000	102130000	0	0	0	3	0	0	0	0	0	0	0	0	0	1.56335e-05	0	0	0	0	0	0	0	0	0	0	0	0	0	0	0	4.06725e-06	4.06725e-06	0	0	0	0	0	0	0	0	0	0	0	0	0	0
242	1	10214	102130000	102140000	0	0	0	0	0	0	0	0	1	0	0	0	0	0	0	0	0	0	1.82652e-05	0	0	0	0	0	0	0	6.57388e-07	0	0	0	6.57388e-07	0	0	0	0	0	0	0	0	0	0	0	0	0	0
243	1	10215	102140000	102150000	0	0	0	0	0	0	0	0	0	0	0	0	0	0	0	0	0	0	0	0	0	0	0	0	0	0	0	0	0	0	0	0	0	0	0	0	0	0	0	0	0	0	0	0	0
244	1	10216	102150000	102160000	0	0	0	0	0	0	0	0	0	0	0	0	0	0	0	0	0	0	0	0	0	0	0	0	0	0	0	0	0	0	0	0	0	0	0	0	0	0	0	0	0	0	0	0	0
245	1	10217	102160000	102170000	0	0	0	0	0	0	0	0	0	0	0	0	0	0	0	0	0	0	0	0	0	0	0	0	0	0	0	0	0	0	0	0	0	0	0	0	0	0	0	0	0	0	0	0	0
246	1	10218	102170000	102180000	0	0	0	0	1	0	0	0	0	0	0	0	0	0	4.48209e-05	0	0	0	0	0	0	0	0	0	5.43748e-06	0	0	0	0	0	5.43748e-06	0	0	0	0	0	0	0	0	0	0	0	0	0	0
247	1	10219	102180000	102190000	0	0	0	0	0	0	0	0	0	0	0	0	0	0	0	0	0	0	0	0	0	0	0	0	0	0	0	0	0	0	0	0	0	0	0	0	0	0	0	0	0	0	0	0	0
248	1	1022	10210000	10220000	0	0	0	0	0	0	0	0	1	0	0	0	0	0	0	0	0	0	1.82652e-05	0	0	0	0	0	0	0	6.57388e-07	0	0	0	6.57388e-07	0	0	0	0	0	0	0	0	0	0	0	0	0	0
249	1	10220	102190000	102200000	0	0	0	0	0	0	1	0	1	0	0	0	0	0	0	0	1.16649e-05	0	1.82652e-05	0	0	0	0	0	0	0	6.57388e-07	0	6.11658e-07	0	1.26905e-06	0	0	0	0	0	0	0	0	0	0	0	0	0	0
250	1	10221	102200000	102210000	0	0	0	0	0	0	0	0	0	0	0	0	0	0	0	0	0	0	0	0	0	0	0	0	0	0	0	0	0	0	0	0	0	0	0	0	0	0	0	0	0	0	0	0	0
251	1	10222	102210000	102220000	0	0	0	2	0	0	0	0	1	0	0	0	0	1.04224e-05	0	0	0	0	1.82652e-05	0	0	0	0	0	0	0	6.57388e-07	0	0	2.7115e-06	3.36888e-06	0	0	0	0	0	0	0	0	0	0	0	0	0	0
252	1	10223	102220000	102230000	0	0	0	1	0	0	0	0	0	0	0	0	0	5.21118e-06	0	0	0	0	0	0	0	0	0	0	0	0	0	0	0	1.35575e-06	1.35575e-06	0	0	0	0	0	0	0	0	0	0	0	0	0	0
253	1	10224	102230000	102240000	0	0	0	0	0	0	0	0	0	0	0	0	0	0	0	0	0	0	0	0	0	0	0	0	0	0	0	0	0	0	0	0	0	0	0	0	0	0	0	0	0	0	0	0	0
254	1	10225	102240000	102250000	0	0	0	0	0	1	0	0	0	0	0	0	0	0	0	1.39678e-05	0	0	0	0	0	0	0	0	0	0	0	5.17889e-07	0	0	5.17889e-07	0	0	0	0	0	0	0	0	0	0	0	0	0	0
255	1	10226	102250000	102260000	0	0	0	0	0	0	0	0	0	0	0	0	0	0	0	0	0	0	0	0	0	0	0	0	0	0	0	0	0	0	0	0	0	0	0	0	0	0	0	0	0	0	0	0	0
256	1	10227	102260000	102270000	0	0	0	0	0	0	0	0	2	0	0	0	0	0	0	0	0	0	3.65303e-05	0	0	0	0	0	0	0	1.31478e-06	0	0	0	1.31478e-06	0	0	0	0	0	0	0	0	0	0	0	0	0	0
257	1	10228	102270000	102280000	0	0	0	0	0	0	0	0	1	0	0	0	0	0	0	0	0	0	1.82652e-05	0	0	0	0	0	0	0	6.57388e-07	0	0	0	6.57388e-07	0	0	0	0	0	0	0	0	0	0	0	0	0	0
258	1	10229	102280000	102290000	0	0	0	0	0	0	0	0	0	0	0	0	0	0	0	0	0	0	0	0	0	0	0	0	0	0	0	0	0	0	0	0	0	0	0	0	0	0	0	0	0	0	0	0	0
259	1	1023	10220000	10230000	0	0	0	0	0	2	0	0	0	0	0	0	0	0	0	2.79357e-05	0	0	0	0	0	0	0	0	0	0	0	1.03578e-06	0	0	1.03578e-06	0	0	0	0	0	0	0	0	0	0	0	0	0	0
260	1	10230	102290000	102300000	0	0	0	0	0	2	0	0	0	0	0	0	0	0	0	2.79357e-05	0	0	0	0	0	0	0	0	0	0	0	1.03578e-06	0	0	1.03578e-06	0	0	0	0	0	0	0	0	0	0	0	0	0	0
261	1	10231	102300000	102310000	0	0	0	0	0	0	0	0	0	0	0	0	0	0	0	0	0	0	0	0	0	0	0	0	0	0	0	0	0	0	0	0	0	0	0	0	0	0	0	0	0	0	0	0	0
262	1	10232	102310000	102320000	0	0	0	0	0	1	0	0	1	0	0	0	0	0	0	1.39678e-05	0	0	1.82652e-05	0	0	0	0	0	0	0	6.57388e-07	5.17889e-07	0	0	1.17528e-06	0	0	0	0	0	0	0	0	0	0	0	0	0	0
263	1	10233	102320000	102330000	0	0	0	0	0	1	0	0	0	0	0	0	0	0	0	1.39678e-05	0	0	0	0	0	0	0	0	0	0	0	5.17889e-07	0	0	5.17889e-07	0	0	0	0	0	0	0	0	0	0	0	0	0	0
264	1	10234	102330000	102340000	0	0	0	1	0	0	0	0	0	0	0	0	0	5.21118e-06	0	0	0	0	0	0	0	0	0	0	0	0	0	0	0	1.35575e-06	1.35575e-06	0	0	0	0	0	0	0	0	0	0	0	0	0	0
265	1	10235	102340000	102350000	0	0	0	0	0	0	0	0	1	0	0	0	0	0	0	0	0	0	1.82652e-05	0	0	0	0	0	0	0	6.57388e-07	0	0	0	6.57388e-07	0	0	0	0	0	0	0	0	0	0	0	0	0	0
266	1	10236	102350000	102360000	0	0	0	0	0	0	2	0	0	0	0	0	0	0	0	0	2.33299e-05	0	0	0	0	0	0	0	0	0	0	0	1.22332e-06	0	1.22332e-06	0	0	0	0	0	0	0	0	0	0	0	0	0	0
267	1	10237	102360000	102370000	0	0	0	0	0	0	0	0	0	0	0	0	0	0	0	0	0	0	0	0	0	0	0	0	0	0	0	0	0	0	0	0	0	0	0	0	0	0	0	0	0	0	0	0	0
268	1	10238	102370000	102380000	0	0	0	0	0	0	0	0	0	0	0	0	0	0	0	0	0	0	0	0	0	0	0	0	0	0	0	0	0	0	0	0	0	0	0	0	0	0	0	0	0	0	0	0	0
269	1	10239	102380000	102390000	0	0	0	0	0	0	0	0	0	0	0	0	0	0	0	0	0	0	0	0	0	0	0	0	0	0	0	0	0	0	0	0	0	0	0	0	0	0	0	0	0	0	0	0	0
270	1	1024	10230000	10240000	0	0	0	1	0	1	0	0	0	0	0	0	0	5.21118e-06	0	1.39678e-05	0	0	0	0	0	0	0	0	0	0	0	5.17889e-07	0	1.35575e-06	1.87364e-06	0	0	0	0	0	0	0	0	0	0	0	0	0	0
271	1	10240	102390000	102400000	0	0	0	0	0	0	0	0	0	0	0	0	0	0	0	0	0	0	0	0	0	0	0	0	0	0	0	0	0	0	0	0	0	0	0	0	0	0	0	0	0	0	0	0	0
272	1	10241	102400000	102410000	0	0	0	0	0	0	0	0	0	0	0	0	0	0	0	0	0	0	0	0	0	0	0	0	0	0	0	0	0	0	0	0	0	0	0	0	0	0	0	0	0	0	0	0	0
273	1	10242	102410000	102420000	0	0	0	0	0	0	0	0	0	0	0	0	0	0	0	0	0	0	0	0	0	0	0	0	0	0	0	0	0	0	0	0	0	0	0	0	0	0	0	0	0	0	0	0	0
274	1	10243	102420000	102430000	0	0	0	1	0	0	0	1	0	0	0	0	0	5.21118e-06	0	0	0	2.0859e-05	0	0	0	0	0	0	0	3.59838e-06	0	0	0	1.35575e-06	4.95413e-06	0	0	0	0	0	0	0	0	0	0	0	0	0	0
275	1	10244	102430000	102440000	0	0	0	1	0	0	0	0	0	0	0	0	0	5.21118e-06	0	0	0	0	0	0	0	0	0	0	0	0	0	0	0	1.35575e-06	1.35575e-06	0	0	0	0	0	0	0	0	0	0	0	0	0	0
276	1	10245	102440000	102450000	0	0	0	0	0	0	0	0	0	0	0	0	0	0	0	0	0	0	0	0	0	0	0	0	0	0	0	0	0	0	0	0	0	0	0	0	0	0	0	0	0	0	0	0	0
277	1	10246	102450000	102460000	0	0	0	0	0	0	0	0	0	0	0	0	0	0	0	0	0	0	0	0	0	0	0	0	0	0	0	0	0	0	0	0	0	0	0	0	0	0	0	0	0	0	0	0	0
278	1	10247	102460000	102470000	0	0	0	0	0	0	0	0	0	0	0	0	0	0	0	0	0	0	0	0	0	0	0	0	0	0	0	0	0	0	0	0	0	0	0	0	0	0	0	0	0	0	0	0	0
279	1	10248	102470000	102480000	0	0	0	1	0	0	0	0	0	0	0	0	0	5.21118e-06	0	0	0	0	0	0	0	0	0	0	0	0	0	0	0	1.35575e-06	1.35575e-06	0	0	0	0	0	0	0	0	0	0	0	0	0	0
280	1	10249	102480000	102490000	0	0	0	0	0	0	0	0	0	0	0	0	0	0	0	0	0	0	0	0	0	0	0	0	0	0	0	0	0	0	0	0	0	0	0	0	0	0	0	0	0	0	0	0	0
281	1	1025	10240000	10250000	0	0	0	0	0	1	0	0	0	0	0	0	0	0	0	1.39678e-05	0	0	0	0	0	0	0	0	0	0	0	5.17889e-07	0	0	5.17889e-07	0	0	0	0	0	0	0	0	0	0	0	0	0	0
282	1	10250	102490000	102500000	0	0	0	0	0	0	0	0	0	0	0	0	0	0	0	0	0	0	0	0	0	0	0	0	0	0	0	0	0	0	0	0	0	0	0	0	0	0	0	0	0	0	0	0	0
283	1	10251	102500000	102510000	0	0	0	0	0	0	0	0	2	0	0	0	0	0	0	0	0	0	3.65303e-05	0	0	0	0	0	0	0	1.31478e-06	0	0	0	1.31478e-06	0	0	0	0	0	0	0	0	0	0	0	0	0	0
284	1	10252	102510000	102520000	0	0	0	0	0	2	0	0	0	0	0	0	0	0	0	2.79357e-05	0	0	0	0	0	0	0	0	0	0	0	1.03578e-06	0	0	1.03578e-06	0	0	0	0	0	0	0	0	0	0	0	0	0	0
285	1	10253	102520000	102530000	0	0	0	0	0	0	0	0	0	0	0	0	0	0	0	0	0	0	0	0	0	0	0	0	0	0	0	0	0	0	0	0	0	0	0	0	0	0	0	0	0	0	0	0	0
286	1	10254	102530000	102540000	0	0	0	0	0	0	0	0	0	0	0	0	0	0	0	0	0	0	0	0	0	0	0	0	0	0	0	0	0	0	0	0	0	0	0	0	0	0	0	0	0	0	0	0	0
287	1	10255	102540000	102550000	0	0	0	0	0	0	0	0	0	0	0	0	0	0	0	0	0	0	0	0	0	0	0	0	0	0	0	0	0	0	0	0	0	0	0	0	0	0	0	0	0	0	0	0	0
288	1	10256	102550000	102560000	0	0	0	0	0	1	0	0	0	0	0	0	0	0	0	1.39678e-05	0	0	0	0	0	0	0	0	0	0	0	5.17889e-07	0	0	5.17889e-07	0	0	0	0	0	0	0	0	0	0	0	0	0	0
289	1	10257	102560000	102570000	0	0	0	2	0	2	0	0	0	0	0	0	0	1.04224e-05	0	2.79357e-05	0	0	0	0	0	0	0	0	0	0	0	1.03578e-06	0	2.7115e-06	3.74728e-06	0	0	0	0	0	0	0	0	0	0	0	0	0	0
290	1	10258	102570000	102580000	0	0	0	0	0	0	0	0	0	0	0	0	0	0	0	0	0	0	0	0	0	0	0	0	0	0	0	0	0	0	0	0	0	0	0	0	0	0	0	0	0	0	0	0	0
291	1	10259	102580000	102590000	0	0	0	0	0	0	1	1	0	0	0	0	0	0	0	0	1.16649e-05	2.0859e-05	0	0	0	0	0	0	0	3.59838e-06	0	0	6.11658e-07	0	4.21004e-06	0	0	0	0	0	0	0	0	0	0	0	0	0	0
292	1	1026	10250000	10260000	0	0	0	1	0	0	0	0	0	2	0	0	0	5.21118e-06	0	0	0	0	0	0.000294898	0	0	0	3.87952e-05	0	0	0	0	0	1.35575e-06	4.01509e-05	0	0	0	0	0	0	0	0	0	0	0	0	0	0
293	1	10260	102590000	102600000	0	0	0	0	0	0	0	0	0	0	0	0	0	0	0	0	0	0	0	0	0	0	0	0	0	0	0	0	0	0	0	0	0	0	0	0	0	0	0	0	0	0	0	0	0
294	1	10261	102600000	102610000	0	0	0	0	0	0	0	0	0	0	0	0	0	0	0	0	0	0	0	0	0	0	0	0	0	0	0	0	0	0	0	0	0	0	0	0	0	0	0	0	0	0	0	0	0
295	1	10262	102610000	102620000	0	0	0	0	0	2	0	0	1	0	0	0	0	0	0	2.79357e-05	0	0	1.82652e-05	0	0	0	0	0	0	0	6.57388e-07	1.03578e-06	0	0	1.69317e-06	0	0	0	0	0	0	0	0	0	0	0	0	0	0
296	1	10263	102620000	102630000	0	0	0	0	0	0	0	0	0	0	0	0	0	0	0	0	0	0	0	0	0	0	0	0	0	0	0	0	0	0	0	0	0	0	0	0	0	0	0	0	0	0	0	0	0
297	1	10264	102630000	102640000	0	0	0	0	0	0	0	0	0	0	0	0	0	0	0	0	0	0	0	0	0	0	0	0	0	0	0	0	0	0	0	0	0	0	0	0	0	0	0	0	0	0	0	0	0
298	1	10265	102640000	102650000	0	0	0	0	0	0	1	0	2	0	0	0	0	0	0	0	1.16649e-05	0	3.65303e-05	0	0	0	0	0	0	0	1.31478e-06	0	6.11658e-07	0	1.92643e-06	0	0	0	0	0	0	0	0	0	0	0	0	0	0
299	1	10266	102650000	102660000	0	0	0	0	0	0	1	0	0	0	0	0	0	0	0	0	1.16649e-05	0	0	0	0	0	0	0	0	0	0	0	6.11658e-07	0	6.11658e-07	0	0	0	0	0	0	0	0	0	0	0	0	0	0
300	1	10267	102660000	102670000	0	0	0	0	1	0	0	0	0	0	0	0	0	0	4.48209e-05	0	0	0	0	0	0	0	0	0	5.43748e-06	0	0	0	0	0	5.43748e-06	0	0	0	0	0	0	0	0	0	0	0	0	0	0
301	1	10268	102670000	102680000	0	0	0	1	1	0	0	0	0	0	0	0	0	5.21118e-06	4.48209e-05	0	0	0	0	0	0	0	0	0	5.43748e-06	0	0	0	0	1.35575e-06	6.79323e-06	0	0	0	0	0	0	0	0	0	0	0	0	0	0
302	1	10269	102680000	102690000	0	0	0	1	0	0	0	1	0	0	0	0	0	5.21118e-06	0	0	0	2.0859e-05	0	0	0	0	0	0	0	3.59838e-06	0	0	0	1.35575e-06	4.95413e-06	0	0	0	0	0	0	0	0	0	0	0	0	0	0
303	1	1027	10260000	10270000	0	0	0	0	0	0	0	0	0	2	0	0	0	0	0	0	0	0	0	0.000294898	0	0	0	3.87952e-05	0	0	0	0	0	0	3.87952e-05	0	0	0	0	0	0	0	0	0	0	0	0	0	0
304	1	10270	102690000	102700000	0	0	0	1	0	0	0	0	0	0	0	0	0	5.21118e-06	0	0	0	0	0	0	0	0	0	0	0	0	0	0	0	1.35575e-06	1.35575e-06	0	0	0	0	0	0	0	0	0	0	0	0	0	0
305	1	10271	102700000	102710000	0	0	0	1	0	2	0	1	0	0	0	0	0	5.21118e-06	0	2.79357e-05	0	2.0859e-05	0	0	0	0	0	0	0	3.59838e-06	0	1.03578e-06	0	1.35575e-06	5.98991e-06	0	0	0	0	0	0	0	0	0	0	0	0	0	0
306	1	10272	102710000	102720000	0	0	0	4	0	0	0	0	0	0	0	0	0	2.08447e-05	0	0	0	0	0	0	0	0	0	0	0	0	0	0	0	5.42299e-06	5.42299e-06	0	0	0	0	0	0	0	0	0	0	0	0	0	0
307	1	10273	102720000	102730000	0	0	0	0	0	0	0	0	0	0	0	0	0	0	0	0	0	0	0	0	0	0	0	0	0	0	0	0	0	0	0	0	0	0	0	0	0	0	0	0	0	0	0	0	0
308	1	10274	102730000	102740000	0	0	0	0	0	0	0	0	0	0	0	0	0	0	0	0	0	0	0	0	0	0	0	0	0	0	0	0	0	0	0	0	0	0	0	0	0	0	0	0	0	0	0	0	0
309	1	10275	102740000	102750000	0	0	0	1	0	0	0	0	0	0	0	0	0	5.21118e-06	0	0	0	0	0	0	0	0	0	0	0	0	0	0	0	1.35575e-06	1.35575e-06	0	0	0	0	0	0	0	0	0	0	0	0	0	0
310	1	10276	102750000	102760000	0	0	0	2	0	0	0	0	0	0	0	0	0	1.04224e-05	0	0	0	0	0	0	0	0	0	0	0	0	0	0	0	2.7115e-06	2.7115e-06	0	0	0	0	0	0	0	0	0	0	0	0	0	0
311	1	10277	102760000	102770000	0	0	0	0	1	0	0	0	0	0	0	0	0	0	4.48209e-05	0	0	0	0	0	0	0	0	0	5.43748e-06	0	0	0	0	0	5.43748e-06	0	0	0	0	0	0	0	0	0	0	0	0	0	0
312	1	10278	102770000	102780000	0	0	0	0	0	1	0	1	0	0	0	0	0	0	0	1.39678e-05	0	2.0859e-05	0	0	0	0	0	0	0	3.59838e-06	0	5.17889e-07	0	0	4.11627e-06	0	0	0	0	0	0	0	0	0	0	0	0	0	0
313	1	10279	102780000	102790000	0	0	0	1	0	0	0	3	0	0	0	0	0	5.21118e-06	0	0	0	6.25769e-05	0	0	0	0	0	0	0	1.07951e-05	0	0	0	1.35575e-06	1.21509e-05	0	0	0	0	0	0	0	0	0	0	0	0	0	0
314	1	1028	10270000	10280000	0	0	0	1	0	0	0	0	0	0	0	0	0	5.21118e-06	0	0	0	0	0	0	0	0	0	0	0	0	0	0	0	1.35575e-06	1.35575e-06	0	0	0	0	0	0	0	0	0	0	0	0	0	0
315	1	10280	102790000	102800000	0	0	0	1	0	0	0	0	0	0	0	0	0	5.21118e-06	0	0	0	0	0	0	0	0	0	0	0	0	0	0	0	1.35575e-06	1.35575e-06	0	0	0	0	0	0	0	0	0	0	0	0	0	0
316	1	10281	102800000	102810000	0	0	0	0	0	0	4	0	0	0	0	0	0	0	0	0	4.66597e-05	0	0	0	0	0	0	0	0	0	0	0	2.44663e-06	0	2.44663e-06	0	0	0	0	0	0	0	0	0	0	0	0	0	0
317	1	10282	102810000	102820000	0	0	0	0	0	0	0	0	0	0	0	0	0	0	0	0	0	0	0	0	0	0	0	0	0	0	0	0	0	0	0	0	0	0	0	0	0	0	0	0	0	0	0	0	0
318	1	10283	102820000	102830000	0	0	0	0	0	0	0	0	0	0	0	0	0	0	0	0	0	0	0	0	0	0	0	0	0	0	0	0	0	0	0	0	0	0	0	0	0	0	0	0	0	0	0	0	0
319	1	10284	102830000	102840000	0	0	0	0	0	0	0	0	0	0	0	0	0	0	0	0	0	0	0	0	0	0	0	0	0	0	0	0	0	0	0	0	0	0	0	0	0	0	0	0	0	0	0	0	0
320	1	10285	102840000	102850000	0	0	0	0	0	0	0	0	0	0	0	0	0	0	0	0	0	0	0	0	0	0	0	0	0	0	0	0	0	0	0	0	0	0	0	0	0	0	0	0	0	0	0	0	0
321	1	10286	102850000	102860000	0	0	0	0	0	1	0	0	0	0	0	0	0	0	0	1.39678e-05	0	0	0	0	0	0	0	0	0	0	0	5.17889e-07	0	0	5.17889e-07	0	0	0	0	0	0	0	0	0	0	0	0	0	0
322	1	10287	102860000	102870000	0	0	0	0	0	0	0	0	0	0	0	0	0	0	0	0	0	0	0	0	0	0	0	0	0	0	0	0	0	0	0	0	0	0	0	0	0	0	0	0	0	0	0	0	0
323	1	10288	102870000	102880000	0	0	0	0	0	0	1	0	0	0	0	0	0	0	0	0	1.16649e-05	0	0	0	0	0	0	0	0	0	0	0	6.11658e-07	0	6.11658e-07	0	0	0	0	0	0	0	0	0	0	0	0	0	0
324	1	10289	102880000	102890000	0	0	0	0	0	0	2	0	0	0	0	0	0	0	0	0	2.33299e-05	0	0	0	0	0	0	0	0	0	0	0	1.22332e-06	0	1.22332e-06	0	0	0	0	0	0	0	0	0	0	0	0	0	0
325	1	1029	10280000	10290000	0	0	0	0	0	0	0	0	0	0	0	0	0	0	0	0	0	0	0	0	0	0	0	0	0	0	0	0	0	0	0	0	0	0	0	0	0	0	0	0	0	0	0	0	0
326	1	10290	102890000	102900000	0	0	0	0	0	0	0	0	0	0	0	0	0	0	0	0	0	0	0	0	0	0	0	0	0	0	0	0	0	0	0	0	0	0	0	0	0	0	0	0	0	0	0	0	0
327	1	10291	102900000	102910000	0	0	0	0	0	0	0	0	0	0	0	0	0	0	0	0	0	0	0	0	0	0	0	0	0	0	0	0	0	0	0	0	0	0	0	0	0	0	0	0	0	0	0	0	0
328	1	10292	102910000	102920000	0	0	0	0	1	0	0	0	0	0	0	0	0	0	4.48209e-05	0	0	0	0	0	0	0	0	0	5.43748e-06	0	0	0	0	0	5.43748e-06	0	0	0	0	0	0	0	0	0	0	0	0	0	0
329	1	10293	102920000	102930000	0	0	0	0	1	0	0	0	0	0	0	0	0	0	4.48209e-05	0	0	0	0	0	0	0	0	0	5.43748e-06	0	0	0	0	0	5.43748e-06	0	0	0	0	0	0	0	0	0	0	0	0	0	0
330	1	10294	102930000	102940000	0	0	0	0	0	1	0	0	0	0	0	0	0	0	0	1.39678e-05	0	0	0	0	0	0	0	0	0	0	0	5.17889e-07	0	0	5.17889e-07	0	0	0	0	0	0	0	0	0	0	0	0	0	0
331	1	10295	102940000	102950000	0	0	0	0	0	0	0	0	0	0	0	0	0	0	0	0	0	0	0	0	0	0	0	0	0	0	0	0	0	0	0	0	0	0	0	0	0	0	0	0	0	0	0	0	0
332	1	10296	102950000	102960000	0	0	0	2	0	0	0	0	0	0	0	0	0	1.04224e-05	0	0	0	0	0	0	0	0	0	0	0	0	0	0	0	2.7115e-06	2.7115e-06	0	0	0	0	0	0	0	0	0	0	0	0	0	0
333	1	10297	102960000	102970000	0	0	0	0	0	2	0	0	0	0	0	0	0	0	0	2.79357e-05	0	0	0	0	0	0	0	0	0	0	0	1.03578e-06	0	0	1.03578e-06	0	0	0	0	0	0	0	0	0	0	0	0	0	0
334	1	10298	102970000	102980000	0	0	0	1	0	0	0	0	0	0	0	0	0	5.21118e-06	0	0	0	0	0	0	0	0	0	0	0	0	0	0	0	1.35575e-06	1.35575e-06	0	0	0	0	0	0	0	0	0	0	0	0	0	0
335	1	10299	102980000	102990000	0	0	0	0	0	0	0	0	0	0	0	0	0	0	0	0	0	0	0	0	0	0	0	0	0	0	0	0	0	0	0	0	0	0	0	0	0	0	0	0	0	0	0	0	0
336	1	103	1020000	1030000	0	0	0	3	0	2	0	0	0	0	0	0	0	1.56335e-05	0	2.79357e-05	0	0	0	0	0	0	0	0	0	0	0	1.03578e-06	0	4.06725e-06	5.10302e-06	0	0	0	0	0	0	0	0	0	0	0	0	0	0
337	1	1030	10290000	10300000	0	0	0	0	0	0	1	0	0	0	0	0	0	0	0	0	1.16649e-05	0	0	0	0	0	0	0	0	0	0	0	6.11658e-07	0	6.11658e-07	0	0	0	0	0	0	0	0	0	0	0	0	0	0
338	1	10300	102990000	103000000	0	0	0	0	0	0	0	0	0	0	0	0	0	0	0	0	0	0	0	0	0	0	0	0	0	0	0	0	0	0	0	0	0	0	0	0	0	0	0	0	0	0	0	0	0
339	1	10301	103000000	103010000	0	0	0	0	0	0	0	0	0	0	0	0	0	0	0	0	0	0	0	0	0	0	0	0	0	0	0	0	0	0	0	0	0	0	0	0	0	0	0	0	0	0	0	0	0
340	1	10302	103010000	103020000	0	0	0	1	0	0	0	0	0	0	0	0	0	5.21118e-06	0	0	0	0	0	0	0	0	0	0	0	0	0	0	0	1.35575e-06	1.35575e-06	0	0	0	0	0	0	0	0	0	0	0	0	0	0
341	1	10303	103020000	103030000	0	0	0	1	0	0	0	0	0	0	0	0	0	5.21118e-06	0	0	0	0	0	0	0	0	0	0	0	0	0	0	0	1.35575e-06	1.35575e-06	0	0	0	0	0	0	0	0	0	0	0	0	0	0
342	1	10304	103030000	103040000	0	0	0	0	0	0	0	0	0	0	0	0	0	0	0	0	0	0	0	0	0	0	0	0	0	0	0	0	0	0	0	0	0	0	0	0	0	0	0	0	0	0	0	0	0
343	1	10305	103040000	103050000	0	0	0	0	0	2	3	0	0	0	0	0	0	0	0	2.79357e-05	3.49948e-05	0	0	0	0	0	0	0	0	0	0	1.03578e-06	1.83497e-06	0	2.87075e-06	0	0	0	0	0	0	0	0	0	0	0	0	0	0
344	1	10306	103050000	103060000	0	0	0	0	0	0	0	0	0	0	0	0	0	0	0	0	0	0	0	0	0	0	0	0	0	0	0	0	0	0	0	0	0	0	0	0	0	0	0	0	0	0	0	0	0
345	1	10307	103060000	103070000	0	0	0	0	0	0	1	0	0	0	0	0	0	0	0	0	1.16649e-05	0	0	0	0	0	0	0	0	0	0	0	6.11658e-07	0	6.11658e-07	0	0	0	0	0	0	0	0	0	0	0	0	0	0
346	1	10308	103070000	103080000	0	0	0	0	0	0	0	0	0	0	0	0	0	0	0	0	0	0	0	0	0	0	0	0	0	0	0	0	0	0	0	0	0	0	0	0	0	0	0	0	0	0	0	0	0
347	1	10309	103080000	103090000	0	0	0	1	0	0	0	0	0	0	0	0	0	5.21118e-06	0	0	0	0	0	0	0	0	0	0	0	0	0	0	0	1.35575e-06	1.35575e-06	0	0	0	0	0	0	0	0	0	0	0	0	0	0
348	1	1031	10300000	10310000	0	0	0	0	0	0	0	0	0	0	0	0	0	0	0	0	0	0	0	0	0	0	0	0	0	0	0	0	0	0	0	0	0	0	0	0	0	0	0	0	0	0	0	0	0
349	1	10310	103090000	103100000	0	0	0	0	0	0	0	3	0	0	0	0	0	0	0	0	0	6.25769e-05	0	0	0	0	0	0	0	1.07951e-05	0	0	0	0	1.07951e-05	0	0	0	0	0	0	0	0	0	0	0	0	0	0
350	1	10311	103100000	103110000	0	0	0	0	0	0	0	0	0	0	0	0	0	0	0	0	0	0	0	0	0	0	0	0	0	0	0	0	0	0	0	0	0	0	0	0	0	0	0	0	0	0	0	0	0
351	1	10312	103110000	103120000	0	0	0	0	0	0	0	0	0	0	0	0	0	0	0	0	0	0	0	0	0	0	0	0	0	0	0	0	0	0	0	0	0	0	0	0	0	0	0	0	0	0	0	0	0
352	1	10313	103120000	103130000	2	0	0	0	0	0	0	0	0	0	0.000859845	0	0	0	0	0	0	0	0	0	0.000122454	0	0	0	0	0	0	0	0	0	0.000122454	0	0	0	0	0	0	0	0	0	0	0	0	0	0
353	1	10314	103130000	103140000	0	0	0	1	0	0	0	1	1	0	0	0	0	5.21118e-06	0	0	0	2.0859e-05	1.82652e-05	0	0	0	0	0	0	3.59838e-06	6.57388e-07	0	0	1.35575e-06	5.61152e-06	0	0	0	0	0	0	0	0	0	0	0	0	0	0
354	1	10315	103140000	103150000	0	0	0	1	0	0	0	0	0	0	0	0	0	5.21118e-06	0	0	0	0	0	0	0	0	0	0	0	0	0	0	0	1.35575e-06	1.35575e-06	0	0	0	0	0	0	0	0	0	0	0	0	0	0
355	1	10316	103150000	103160000	0	0	0	0	0	0	0	0	0	0	0	0	0	0	0	0	0	0	0	0	0	0	0	0	0	0	0	0	0	0	0	0	0	0	0	0	0	0	0	0	0	0	0	0	0
356	1	10317	103160000	103170000	0	0	0	0	0	0	0	0	1	0	0	0	0	0	0	0	0	0	1.82652e-05	0	0	0	0	0	0	0	6.57388e-07	0	0	0	6.57388e-07	0	0	0	0	0	0	0	0	0	0	0	0	0	0
357	1	10318	103170000	103180000	0	0	0	0	0	0	0	0	0	0	0	0	0	0	0	0	0	0	0	0	0	0	0	0	0	0	0	0	0	0	0	0	0	0	0	0	0	0	0	0	0	0	0	0	0
358	1	10319	103180000	103190000	0	0	0	0	0	0	0	0	0	0	0	0	0	0	0	0	0	0	0	0	0	0	0	0	0	0	0	0	0	0	0	0	0	0	0	0	0	0	0	0	0	0	0	0	0
359	1	1032	10310000	10320000	0	0	0	0	0	0	0	0	0	0	0	0	0	0	0	0	0	0	0	0	0	0	0	0	0	0	0	0	0	0	0	0	0	0	0	0	0	0	0	0	0	0	0	0	0
360	1	10320	103190000	103200000	0	0	0	2	0	0	0	0	2	0	0	0	0	1.04224e-05	0	0	0	0	3.65303e-05	0	0	0	0	0	0	0	1.31478e-06	0	0	2.7115e-06	4.02627e-06	0	0	0	0	0	0	0	0	0	0	0	0	0	0
361	1	10321	103200000	103210000	0	0	0	0	0	0	0	0	0	0	0	0	0	0	0	0	0	0	0	0	0	0	0	0	0	0	0	0	0	0	0	0	0	0	0	0	0	0	0	0	0	0	0	0	0
362	1	10322	103210000	103220000	0	0	0	0	0	0	0	0	0	0	0	0	0	0	0	0	0	0	0	0	0	0	0	0	0	0	0	0	0	0	0	0	0	0	0	0	0	0	0	0	0	0	0	0	0
363	1	10323	103220000	103230000	0	0	0	1	0	0	1	0	0	0	0	0	0	5.21118e-06	0	0	1.16649e-05	0	0	0	0	0	0	0	0	0	0	0	6.11658e-07	1.35575e-06	1.96741e-06	0	0	0	0	0	0	0	0	0	0	0	0	0	0
364	1	10324	103230000	103240000	0	0	0	0	0	0	0	0	0	0	0	0	0	0	0	0	0	0	0	0	0	0	0	0	0	0	0	0	0	0	0	0	0	0	0	0	0	0	0	0	0	0	0	0	0
365	1	10325	103240000	103250000	0	0	0	2	0	0	0	0	0	0	0	0	0	1.04224e-05	0	0	0	0	0	0	0	0	0	0	0	0	0	0	0	2.7115e-06	2.7115e-06	0	0	0	0	0	0	0	0	0	0	0	0	0	0
366	1	10326	103250000	103260000	0	0	0	2	0	0	0	0	0	0	0	0	0	1.04224e-05	0	0	0	0	0	0	0	0	0	0	0	0	0	0	0	2.7115e-06	2.7115e-06	0	0	0	0	0	0	0	0	0	0	0	0	0	0
367	1	10327	103260000	103270000	0	0	0	0	0	0	0	0	0	0	0	0	0	0	0	0	0	0	0	0	0	0	0	0	0	0	0	0	0	0	0	0	0	0	0	0	0	0	0	0	0	0	0	0	0
368	1	10328	103270000	103280000	0	0	0	0	1	0	0	0	0	0	0	0	0	0	4.48209e-05	0	0	0	0	0	0	0	0	0	5.43748e-06	0	0	0	0	0	5.43748e-06	0	0	0	0	0	0	0	0	0	0	0	0	0	0
369	1	10329	103280000	103290000	0	0	0	1	0	0	0	0	0	0	0	0	0	5.21118e-06	0	0	0	0	0	0	0	0	0	0	0	0	0	0	0	1.35575e-06	1.35575e-06	0	0	0	0	0	0	0	0	0	0	0	0	0	0
370	1	1033	10320000	10330000	0	0	0	0	0	0	0	0	0	0	0	0	0	0	0	0	0	0	0	0	0	0	0	0	0	0	0	0	0	0	0	0	0	0	0	0	0	0	0	0	0	0	0	0	0
371	1	10330	103290000	103300000	0	0	0	0	0	0	0	0	0	0	0	0	0	0	0	0	0	0	0	0	0	0	0	0	0	0	0	0	0	0	0	0	0	0	0	0	0	0	0	0	0	0	0	0	0
372	1	10331	103300000	103310000	0	0	0	1	0	0	0	0	0	4	0	0	0	5.21118e-06	0	0	0	0	0	0.000589797	0	0	0	7.75904e-05	0	0	0	0	0	1.35575e-06	7.89461e-05	0	0	0	0	0	0	0	0	0	0	0	0	0	0
373	1	10332	103310000	103320000	0	0	0	0	0	0	0	0	0	0	0	0	0	0	0	0	0	0	0	0	0	0	0	0	0	0	0	0	0	0	0	0	0	0	0	0	0	0	0	0	0	0	0	0	0
374	1	10333	103320000	103330000	0	2	0	0	0	0	0	0	0	0	0	0.000785546	0	0	0	0	0	0	0	0	0	0	5.36209e-06	0	0	0	0	0	0	0	5.36209e-06	0	0	0	0	0	0	0	0	0	0	0	0	0	0
375	1	10334	103330000	103340000	0	0	0	1	0	0	0	0	0	0	0	0	0	5.21118e-06	0	0	0	0	0	0	0	0	0	0	0	0	0	0	0	1.35575e-06	1.35575e-06	0	0	0	0	0	0	0	0	0	0	0	0	0	0
376	1	10335	103340000	103350000	0	0	0	0	0	0	0	0	0	0	0	0	0	0	0	0	0	0	0	0	0	0	0	0	0	0	0	0	0	0	0	0	0	0	0	0	0	0	0	0	0	0	0	0	0
377	1	10336	103350000	103360000	0	0	0	0	0	0	2	0	0	0	0	0	0	0	0	0	2.33299e-05	0	0	0	0	0	0	0	0	0	0	0	1.22332e-06	0	1.22332e-06	0	0	0	0	0	0	0	0	0	0	0	0	0	0
378	1	10337	103360000	103370000	0	0	0	0	0	0	2	0	0	0	0	0	0	0	0	0	2.33299e-05	0	0	0	0	0	0	0	0	0	0	0	1.22332e-06	0	1.22332e-06	0	0	0	0	0	0	0	0	0	0	0	0	0	0
379	1	10338	103370000	103380000	0	0	0	0	0	0	0	0	0	0	0	0	0	0	0	0	0	0	0	0	0	0	0	0	0	0	0	0	0	0	0	0	0	0	0	0	0	0	0	0	0	0	0	0	0
380	1	10339	103380000	103390000	0	0	0	0	0	0	1	0	0	0	0	0	0	0	0	0	1.16649e-05	0	0	0	0	0	0	0	0	0	0	0	6.11658e-07	0	6.11658e-07	0	0	0	0	0	0	0	0	0	0	0	0	0	0
381	1	1034	10330000	10340000	0	0	0	0	0	0	0	0	0	0	0	0	0	0	0	0	0	0	0	0	0	0	0	0	0	0	0	0	0	0	0	0	0	0	0	0	0	0	0	0	0	0	0	0	0
382	1	10340	103390000	103400000	0	0	0	0	0	0	0	0	0	0	0	0	0	0	0	0	0	0	0	0	0	0	0	0	0	0	0	0	0	0	0	0	0	0	0	0	0	0	0	0	0	0	0	0	0
383	1	10341	103400000	103410000	0	0	0	0	0	0	0	0	0	0	0	0	0	0	0	0	0	0	0	0	0	0	0	0	0	0	0	0	0	0	0	0	0	0	0	0	0	0	0	0	0	0	0	0	0
384	1	10342	103410000	103420000	0	0	0	0	0	0	0	0	0	0	0	0	0	0	0	0	0	0	0	0	0	0	0	0	0	0	0	0	0	0	0	0	0	0	0	0	0	0	0	0	0	0	0	0	0
385	1	10343	103420000	103430000	0	0	0	0	0	0	0	0	0	0	0	0	0	0	0	0	0	0	0	0	0	0	0	0	0	0	0	0	0	0	0	0	0	0	0	0	0	0	0	0	0	0	0	0	0
386	1	10344	103430000	103440000	0	0	0	0	0	0	0	0	1	0	0	0	0	0	0	0	0	0	1.82652e-05	0	0	0	0	0	0	0	6.57388e-07	0	0	0	6.57388e-07	0	0	0	0	0	0	0	0	0	0	0	0	0	0
387	1	10345	103440000	103450000	0	0	0	1	0	2	0	0	1	0	0	0	0	5.21118e-06	0	2.79357e-05	0	0	1.82652e-05	0	0	0	0	0	0	0	6.57388e-07	1.03578e-06	0	1.35575e-06	3.04891e-06	0	0	0	0	0	0	0	0	0	0	0	0	0	0
388	1	10346	103450000	103460000	0	0	0	0	0	0	0	0	1	0	0	0	0	0	0	0	0	0	1.82652e-05	0	0	0	0	0	0	0	6.57388e-07	0	0	0	6.57388e-07	0	0	0	0	0	0	0	0	0	0	0	0	0	0
389	1	10347	103460000	103470000	0	0	0	0	0	0	0	0	0	0	0	0	0	0	0	0	0	0	0	0	0	0	0	0	0	0	0	0	0	0	0	0	0	0	0	0	0	0	0	0	0	0	0	0	0
390	1	10348	103470000	103480000	0	0	0	0	0	0	2	0	0	0	0	0	0	0	0	0	2.33299e-05	0	0	0	0	0	0	0	0	0	0	0	1.22332e-06	0	1.22332e-06	0	0	0	0	0	0	0	0	0	0	0	0	0	0
391	1	10349	103480000	103490000	0	0	0	0	0	2	0	0	0	0	0	0	0	0	0	2.79357e-05	0	0	0	0	0	0	0	0	0	0	0	1.03578e-06	0	0	1.03578e-06	0	0	0	0	0	0	0	0	0	0	0	0	0	0
392	1	1035	10340000	10350000	0	0	0	0	0	0	1	0	0	2	0	0	0	0	0	0	1.16649e-05	0	0	0.000294898	0	0	0	3.87952e-05	0	0	0	0	6.11658e-07	0	3.94068e-05	0	0	0	0	0	0	0	0	0	0	0	0	0	0
393	1	10350	103490000	103500000	0	0	0	0	0	0	0	0	0	0	0	0	0	0	0	0	0	0	0	0	0	0	0	0	0	0	0	0	0	0	0	0	0	0	0	0	0	0	0	0	0	0	0	0	0
394	1	10351	103500000	103510000	0	0	0	0	0	0	1	1	0	0	0	0	0	0	0	0	1.16649e-05	2.0859e-05	0	0	0	0	0	0	0	3.59838e-06	0	0	6.11658e-07	0	4.21004e-06	0	0	0	0	0	0	0	0	0	0	0	0	0	0
395	1	10352	103510000	103520000	0	0	0	0	0	0	0	0	0	0	0	0	0	0	0	0	0	0	0	0	0	0	0	0	0	0	0	0	0	0	0	0	0	0	0	0	0	0	0	0	0	0	0	0	0
396	1	10353	103520000	103530000	0	0	0	0	0	0	0	0	0	0	0	0	0	0	0	0	0	0	0	0	0	0	0	0	0	0	0	0	0	0	0	0	0	0	0	0	0	0	0	0	0	0	0	0	0
397	1	10354	103530000	103540000	0	0	0	1	0	0	0	0	0	0	0	0	0	5.21118e-06	0	0	0	0	0	0	0	0	0	0	0	0	0	0	0	1.35575e-06	1.35575e-06	0	0	0	0	0	0	0	0	0	0	0	0	0	0
398	1	10355	103540000	103550000	0	0	0	1	0	0	0	0	0	0	0	0	0	5.21118e-06	0	0	0	0	0	0	0	0	0	0	0	0	0	0	0	1.35575e-06	1.35575e-06	0	0	0	0	0	0	0	0	0	0	0	0	0	0
399	1	10356	103550000	103560000	0	0	0	1	0	0	0	0	0	0	0	0	0	5.21118e-06	0	0	0	0	0	0	0	0	0	0	0	0	0	0	0	1.35575e-06	1.35575e-06	0	0	0	0	0	0	0	0	0	0	0	0	0	0
400	1	10357	103560000	103570000	0	0	0	0	0	1	0	0	0	0	0	0	0	0	0	1.39678e-05	0	0	0	0	0	0	0	0	0	0	0	5.17889e-07	0	0	5.17889e-07	0	0	0	0	0	0	0	0	0	0	0	0	0	0
401	1	10358	103570000	103580000	0	0	0	0	0	1	0	0	0	0	0	0	0	0	0	1.39678e-05	0	0	0	0	0	0	0	0	0	0	0	5.17889e-07	0	0	5.17889e-07	0	0	0	0	0	0	0	0	0	0	0	0	0	0
402	1	10359	103580000	103590000	0	0	0	1	0	0	0	0	0	0	0	0	0	5.21118e-06	0	0	0	0	0	0	0	0	0	0	0	0	0	0	0	1.35575e-06	1.35575e-06	0	0	0	0	0	0	0	0	0	0	0	0	0	0
403	1	1036	10350000	10360000	0	0	0	1	0	0	0	0	0	2	0	0	0	5.21118e-06	0	0	0	0	0	0.000294898	0	0	0	3.87952e-05	0	0	0	0	0	1.35575e-06	4.01509e-05	0	0	0	0	0	0	0	0	0	0	0	0	0	0
404	1	10360	103590000	103600000	0	0	0	1	0	1	1	0	0	0	0	0	0	5.21118e-06	0	1.39678e-05	1.16649e-05	0	0	0	0	0	0	0	0	0	0	5.17889e-07	6.11658e-07	1.35575e-06	2.4853e-06	0	0	0	0	0	0	0	0	0	0	0	0	0	0
405	1	10361	103600000	103610000	0	0	0	0	0	0	0	0	0	0	0	0	0	0	0	0	0	0	0	0	0	0	0	0	0	0	0	0	0	0	0	0	0	0	0	0	0	0	0	0	0	0	0	0	0
406	1	10362	103610000	103620000	0	0	0	0	0	0	0	0	0	0	0	0	0	0	0	0	0	0	0	0	0	0	0	0	0	0	0	0	0	0	0	0	0	0	0	0	0	0	0	0	0	0	0	0	0
407	1	10363	103620000	103630000	0	0	0	0	0	0	0	0	0	0	0	0	0	0	0	0	0	0	0	0	0	0	0	0	0	0	0	0	0	0	0	0	0	0	0	0	0	0	0	0	0	0	0	0	0
408	1	10364	103630000	103640000	0	0	0	1	0	1	2	0	1	0	0	0	0	5.21118e-06	0	1.39678e-05	2.33299e-05	0	1.82652e-05	0	0	0	0	0	0	0	6.57388e-07	5.17889e-07	1.22332e-06	1.35575e-06	3.75434e-06	0	0	0	0	0	0	0	0	0	0	0	0	0	0
409	1	10365	103640000	103650000	0	0	0	0	0	0	0	0	0	0	0	0	0	0	0	0	0	0	0	0	0	0	0	0	0	0	0	0	0	0	0	0	0	0	0	0	0	0	0	0	0	0	0	0	0
410	1	10366	103650000	103660000	0	0	0	0	0	0	0	0	0	0	0	0	0	0	0	0	0	0	0	0	0	0	0	0	0	0	0	0	0	0	0	0	0	0	0	0	0	0	0	0	0	0	0	0	0
411	1	10367	103660000	103670000	0	0	0	0	0	2	0	1	0	0	0	0	0	0	0	2.79357e-05	0	2.0859e-05	0	0	0	0	0	0	0	3.59838e-06	0	1.03578e-06	0	0	4.63416e-06	0	0	0	0	0	0	0	0	0	0	0	0	0	0
412	1	10368	103670000	103680000	0	0	0	0	0	0	0	0	0	0	0	0	0	0	0	0	0	0	0	0	0	0	0	0	0	0	0	0	0	0	0	0	0	0	0	0	0	0	0	0	0	0	0	0	0
413	1	10369	103680000	103690000	0	0	0	0	0	2	0	0	0	0	0	0	0	0	0	2.79357e-05	0	0	0	0	0	0	0	0	0	0	0	1.03578e-06	0	0	1.03578e-06	0	0	0	0	0	0	0	0	0	0	0	0	0	0
414	1	1037	10360000	10370000	0	0	0	1	0	0	0	0	0	0	0	0	0	5.21118e-06	0	0	0	0	0	0	0	0	0	0	0	0	0	0	0	1.35575e-06	1.35575e-06	0	0	0	0	0	0	0	0	0	0	0	0	0	0
415	1	10370	103690000	103700000	0	0	0	0	0	0	0	0	0	0	0	0	0	0	0	0	0	0	0	0	0	0	0	0	0	0	0	0	0	0	0	0	0	0	0	0	0	0	0	0	0	0	0	0	0
416	1	10371	103700000	103710000	0	0	0	0	0	0	0	0	0	0	0	0	0	0	0	0	0	0	0	0	0	0	0	0	0	0	0	0	0	0	0	0	0	0	0	0	0	0	0	0	0	0	0	0	0
417	1	10372	103710000	103720000	0	0	0	1	0	0	0	0	0	0	0	0	0	5.21118e-06	0	0	0	0	0	0	0	0	0	0	0	0	0	0	0	1.35575e-06	1.35575e-06	0	0	0	0	0	0	0	0	0	0	0	0	0	0
418	1	10373	103720000	103730000	0	0	0	0	0	0	0	0	0	0	0	0	0	0	0	0	0	0	0	0	0	0	0	0	0	0	0	0	0	0	0	0	0	0	0	0	0	0	0	0	0	0	0	0	0
419	1	10374	103730000	103740000	0	0	0	0	0	0	0	0	0	0	0	0	0	0	0	0	0	0	0	0	0	0	0	0	0	0	0	0	0	0	0	0	0	0	0	0	0	0	0	0	0	0	0	0	0
420	1	10375	103740000	103750000	0	0	0	0	0	0	0	0	0	0	0	0	0	0	0	0	0	0	0	0	0	0	0	0	0	0	0	0	0	0	0	0	0	0	0	0	0	0	0	0	0	0	0	0	0
421	1	10376	103750000	103760000	0	0	0	2	0	0	0	0	0	0	0	0	0	1.04224e-05	0	0	0	0	0	0	0	0	0	0	0	0	0	0	0	2.7115e-06	2.7115e-06	0	0	0	0	0	0	0	0	0	0	0	0	0	0
422	1	10377	103760000	103770000	0	0	0	0	0	0	0	0	0	0	0	0	0	0	0	0	0	0	0	0	0	0	0	0	0	0	0	0	0	0	0	0	0	0	0	0	0	0	0	0	0	0	0	0	0
423	1	10378	103770000	103780000	0	0	0	1	0	0	0	0	0	0	0	0	0	5.21118e-06	0	0	0	0	0	0	0	0	0	0	0	0	0	0	0	1.35575e-06	1.35575e-06	0	0	0	0	0	0	0	0	0	0	0	0	0	0
424	1	10379	103780000	103790000	0	0	0	1	0	0	0	0	0	0	0	0	0	5.21118e-06	0	0	0	0	0	0	0	0	0	0	0	0	0	0	0	1.35575e-06	1.35575e-06	0	0	0	0	0	0	0	0	0	0	0	0	0	0
425	1	1038	10370000	10380000	0	0	0	0	0	0	0	0	0	0	0	0	0	0	0	0	0	0	0	0	0	0	0	0	0	0	0	0	0	0	0	0	0	0	0	0	0	0	0	0	0	0	0	0	0
426	1	10380	103790000	103800000	0	0	0	0	0	0	0	0	0	0	0	0	0	0	0	0	0	0	0	0	0	0	0	0	0	0	0	0	0	0	0	0	0	0	0	0	0	0	0	0	0	0	0	0	0
427	1	10381	103800000	103810000	0	0	0	0	0	0	0	0	0	0	0	0	0	0	0	0	0	0	0	0	0	0	0	0	0	0	0	0	0	0	0	0	0	0	0	0	0	0	0	0	0	0	0	0	0
428	1	10382	103810000	103820000	0	0	0	0	0	0	0	0	0	0	0	0	0	0	0	0	0	0	0	0	0	0	0	0	0	0	0	0	0	0	0	0	0	0	0	0	0	0	0	0	0	0	0	0	0
429	1	10383	103820000	103830000	0	0	0	0	0	0	0	0	0	0	0	0	0	0	0	0	0	0	0	0	0	0	0	0	0	0	0	0	0	0	0	0	0	0	0	0	0	0	0	0	0	0	0	0	0
430	1	10384	103830000	103840000	0	0	0	0	0	0	0	0	0	0	0	0	0	0	0	0	0	0	0	0	0	0	0	0	0	0	0	0	0	0	0	0	0	0	0	0	0	0	0	0	0	0	0	0	0
431	1	10385	103840000	103850000	0	0	0	0	0	0	0	0	0	0	0	0	0	0	0	0	0	0	0	0	0	0	0	0	0	0	0	0	0	0	0	0	0	0	0	0	0	0	0	0	0	0	0	0	0
432	1	10386	103850000	103860000	0	0	0	0	0	0	0	0	0	0	0	0	0	0	0	0	0	0	0	0	0	0	0	0	0	0	0	0	0	0	0	0	0	0	0	0	0	0	0	0	0	0	0	0	0
433	1	10387	103860000	103870000	0	0	0	0	0	0	0	0	0	0	0	0	0	0	0	0	0	0	0	0	0	0	0	0	0	0	0	0	0	0	0	0	0	0	0	0	0	0	0	0	0	0	0	0	0
434	1	10388	103870000	103880000	0	0	0	0	0	0	0	0	0	0	0	0	0	0	0	0	0	0	0	0	0	0	0	0	0	0	0	0	0	0	0	0	0	0	0	0	0	0	0	0	0	0	0	0	0
435	1	10389	103880000	103890000	0	0	0	0	0	0	0	0	0	0	0	0	0	0	0	0	0	0	0	0	0	0	0	0	0	0	0	0	0	0	0	0	0	0	0	0	0	0	0	0	0	0	0	0	0
436	1	1039	10380000	10390000	0	0	0	0	1	0	0	0	0	0	0	0	0	0	4.48209e-05	0	0	0	0	0	0	0	0	0	5.43748e-06	0	0	0	0	0	5.43748e-06	0	0	0	0	0	0	0	0	0	0	0	0	0	0
437	1	10390	103890000	103900000	0	0	0	0	0	0	0	0	0	0	0	0	0	0	0	0	0	0	0	0	0	0	0	0	0	0	0	0	0	0	0	0	0	0	0	0	0	0	0	0	0	0	0	0	0
438	1	10391	103900000	103910000	0	0	0	0	0	0	0	0	0	0	0	0	0	0	0	0	0	0	0	0	0	0	0	0	0	0	0	0	0	0	0	0	0	0	0	0	0	0	0	0	0	0	0	0	0
439	1	10392	103910000	103920000	0	0	0	0	0	0	0	0	0	0	0	0	0	0	0	0	0	0	0	0	0	0	0	0	0	0	0	0	0	0	0	0	0	0	0	0	0	0	0	0	0	0	0	0	0
440	1	10393	103920000	103930000	0	0	0	0	0	0	0	0	0	0	0	0	0	0	0	0	0	0	0	0	0	0	0	0	0	0	0	0	0	0	0	0	0	0	0	0	0	0	0	0	0	0	0	0	0
441	1	10394	103930000	103940000	0	0	0	0	0	0	0	0	0	0	0	0	0	0	0	0	0	0	0	0	0	0	0	0	0	0	0	0	0	0	0	0	0	0	0	0	0	0	0	0	0	0	0	0	0
442	1	10395	103940000	103950000	0	0	0	0	0	0	0	0	0	0	0	0	0	0	0	0	0	0	0	0	0	0	0	0	0	0	0	0	0	0	0	0	0	0	0	0	0	0	0	0	0	0	0	0	0
443	1	10396	103950000	103960000	0	0	0	0	0	0	0	0	0	0	0	0	0	0	0	0	0	0	0	0	0	0	0	0	0	0	0	0	0	0	0	0	0	0	0	0	0	0	0	0	0	0	0	0	0
444	1	10397	103960000	103970000	0	0	0	0	0	0	0	0	0	0	0	0	0	0	0	0	0	0	0	0	0	0	0	0	0	0	0	0	0	0	0	0	0	0	0	0	0	0	0	0	0	0	0	0	0
445	1	10398	103970000	103980000	0	0	0	0	0	0	0	0	0	0	0	0	0	0	0	0	0	0	0	0	0	0	0	0	0	0	0	0	0	0	0	0	0	0	0	0	0	0	0	0	0	0	0	0	0
446	1	10399	103980000	103990000	0	0	0	0	0	0	0	0	0	0	0	0	0	0	0	0	0	0	0	0	0	0	0	0	0	0	0	0	0	0	0	0	0	0	0	0	0	0	0	0	0	0	0	0	0
447	1	104	1030000	1040000	0	0	0	6	0	6	0	8	0	0	0	0	0	3.12671e-05	0	8.38071e-05	0	0.000166872	0	0	0	0	0	0	0	2.87871e-05	0	3.10734e-06	0	8.13449e-06	4.00289e-05	0	0	0	0	0	0	0	0	0	0	0	0	0	0
448	1	1040	10390000	10400000	0	0	0	0	3	2	0	0	1	0	0	0	0	0	0.000134463	2.79357e-05	0	0	1.82652e-05	0	0	0	0	0	1.63124e-05	0	6.57388e-07	1.03578e-06	0	0	1.80056e-05	0	0	0	0	0	0	0	0	0	0	0	0	0	0
449	1	10400	103990000	104000000	0	0	0	0	0	0	0	0	0	0	0	0	0	0	0	0	0	0	0	0	0	0	0	0	0	0	0	0	0	0	0	0	0	0	0	0	0	0	0	0	0	0	0	0	0
450	1	10401	104000000	104010000	0	0	0	0	0	0	0	0	0	0	0	0	0	0	0	0	0	0	0	0	0	0	0	0	0	0	0	0	0	0	0	0	0	0	0	0	0	0	0	0	0	0	0	0	0
451	1	10402	104010000	104020000	0	0	0	0	0	0	0	0	0	0	0	0	0	0	0	0	0	0	0	0	0	0	0	0	0	0	0	0	0	0	0	0	0	0	0	0	0	0	0	0	0	0	0	0	0
452	1	10403	104020000	104030000	0	0	0	0	0	0	0	0	0	0	0	0	0	0	0	0	0	0	0	0	0	0	0	0	0	0	0	0	0	0	0	0	0	0	0	0	0	0	0	0	0	0	0	0	0
453	1	10404	104030000	104040000	0	0	0	0	0	0	0	0	0	0	0	0	0	0	0	0	0	0	0	0	0	0	0	0	0	0	0	0	0	0	0	0	0	0	0	0	0	0	0	0	0	0	0	0	0
454	1	10405	104040000	104050000	0	0	0	1	0	1	0	0	0	0	0	0	0	5.21118e-06	0	1.39678e-05	0	0	0	0	0	0	0	0	0	0	0	5.17889e-07	0	1.35575e-06	1.87364e-06	0	0	0	0	0	0	0	0	0	0	0	0	0	0
455	1	10406	104050000	104060000	0	0	0	1	0	0	0	0	0	0	0	0	0	5.21118e-06	0	0	0	0	0	0	0	0	0	0	0	0	0	0	0	1.35575e-06	1.35575e-06	0	0	0	0	0	0	0	0	0	0	0	0	0	0
456	1	10407	104060000	104070000	0	0	0	0	0	0	0	0	0	0	0	0	0	0	0	0	0	0	0	0	0	0	0	0	0	0	0	0	0	0	0	0	0	0	0	0	0	0	0	0	0	0	0	0	0
457	1	10408	104070000	104080000	0	0	0	2	1	0	0	0	0	0	0	0	0	1.04224e-05	4.48209e-05	0	0	0	0	0	0	0	0	0	5.43748e-06	0	0	0	0	2.7115e-06	8.14897e-06	0	0	0	0	0	0	0	0	0	0	0	0	0	0
458	1	10409	104080000	104090000	0	0	0	1	0	0	0	0	0	0	0	0	0	5.21118e-06	0	0	0	0	0	0	0	0	0	0	0	0	0	0	0	1.35575e-06	1.35575e-06	0	0	0	0	0	0	0	0	0	0	0	0	0	0
459	1	1041	10400000	10410000	0	0	0	3	0	0	0	0	0	0	0	0	0	1.56335e-05	0	0	0	0	0	0	0	0	0	0	0	0	0	0	0	4.06725e-06	4.06725e-06	0	0	0	0	0	0	0	0	0	0	0	0	0	0
460	1	10410	104090000	104100000	0	0	0	1	0	0	0	0	0	0	0	0	0	5.21118e-06	0	0	0	0	0	0	0	0	0	0	0	0	0	0	0	1.35575e-06	1.35575e-06	0	0	0	0	0	0	0	0	0	0	0	0	0	0
461	1	10411	104100000	104110000	0	0	0	0	0	0	0	0	0	0	0	0	0	0	0	0	0	0	0	0	0	0	0	0	0	0	0	0	0	0	0	0	0	0	0	0	0	0	0	0	0	0	0	0	0
462	1	10412	104110000	104120000	0	0	0	0	0	0	0	0	1	0	0	0	0	0	0	0	0	0	1.82652e-05	0	0	0	0	0	0	0	6.57388e-07	0	0	0	6.57388e-07	0	0	0	0	0	0	0	0	0	0	0	0	0	0
463	1	10413	104120000	104130000	0	0	0	1	0	0	0	0	0	0	0	0	0	5.21118e-06	0	0	0	0	0	0	0	0	0	0	0	0	0	0	0	1.35575e-06	1.35575e-06	0	0	0	0	0	0	0	0	0	0	0	0	0	0
464	1	10414	104130000	104140000	0	0	0	0	0	1	0	0	2	0	0	0	0	0	0	1.39678e-05	0	0	3.65303e-05	0	0	0	0	0	0	0	1.31478e-06	5.17889e-07	0	0	1.83266e-06	0	0	0	0	0	0	0	0	0	0	0	0	0	0
465	1	10415	104140000	104150000	0	0	0	0	0	0	0	0	0	0	0	0	0	0	0	0	0	0	0	0	0	0	0	0	0	0	0	0	0	0	0	0	0	0	0	0	0	0	0	0	0	0	0	0	0
466	1	10416	104150000	104160000	0	0	0	2	0	0	0	0	0	0	0	0	0	1.04224e-05	0	0	0	0	0	0	0	0	0	0	0	0	0	0	0	2.7115e-06	2.7115e-06	0	0	0	0	0	0	0	0	0	0	0	0	0	0
467	1	10417	104160000	104170000	0	0	0	0	0	0	0	0	0	0	0	0	0	0	0	0	0	0	0	0	0	0	0	0	0	0	0	0	0	0	0	0	0	0	0	0	0	0	0	0	0	0	0	0	0
468	1	10418	104170000	104180000	0	0	0	0	0	0	0	0	0	0	0	0	0	0	0	0	0	0	0	0	0	0	0	0	0	0	0	0	0	0	0	0	0	0	0	0	0	0	0	0	0	0	0	0	0
469	1	10419	104180000	104190000	0	0	0	0	0	0	0	0	0	0	0	0	0	0	0	0	0	0	0	0	0	0	0	0	0	0	0	0	0	0	0	0	0	0	0	0	0	0	0	0	0	0	0	0	0
470	1	1042	10410000	10420000	0	0	0	0	0	0	0	0	1	0	0	0	0	0	0	0	0	0	1.82652e-05	0	0	0	0	0	0	0	6.57388e-07	0	0	0	6.57388e-07	0	0	0	0	0	0	0	0	0	0	0	0	0	0
471	1	10420	104190000	104200000	0	0	0	0	0	0	0	0	0	0	0	0	0	0	0	0	0	0	0	0	0	0	0	0	0	0	0	0	0	0	0	0	0	0	0	0	0	0	0	0	0	0	0	0	0
472	1	10421	104200000	104210000	0	0	0	0	0	0	0	0	0	0	0	0	0	0	0	0	0	0	0	0	0	0	0	0	0	0	0	0	0	0	0	0	0	0	0	0	0	0	0	0	0	0	0	0	0
473	1	10422	104210000	104220000	0	0	0	0	0	0	0	0	0	0	0	0	0	0	0	0	0	0	0	0	0	0	0	0	0	0	0	0	0	0	0	0	0	0	0	0	0	0	0	0	0	0	0	0	0
474	1	10423	104220000	104230000	0	0	0	0	0	0	0	0	0	0	0	0	0	0	0	0	0	0	0	0	0	0	0	0	0	0	0	0	0	0	0	0	0	0	0	0	0	0	0	0	0	0	0	0	0
475	1	10424	104230000	104240000	0	0	0	0	0	0	0	0	0	0	0	0	0	0	0	0	0	0	0	0	0	0	0	0	0	0	0	0	0	0	0	0	0	0	0	0	0	0	0	0	0	0	0	0	0
476	1	10425	104240000	104250000	0	0	0	0	0	0	0	0	0	0	0	0	0	0	0	0	0	0	0	0	0	0	0	0	0	0	0	0	0	0	0	0	0	0	0	0	0	0	0	0	0	0	0	0	0
477	1	10426	104250000	104260000	0	0	0	0	0	0	0	0	0	0	0	0	0	0	0	0	0	0	0	0	0	0	0	0	0	0	0	0	0	0	0	0	0	0	0	0	0	0	0	0	0	0	0	0	0
478	1	10427	104260000	104270000	0	0	0	0	0	0	0	0	0	0	0	0	0	0	0	0	0	0	0	0	0	0	0	0	0	0	0	0	0	0	0	0	0	0	0	0	0	0	0	0	0	0	0	0	0
479	1	10428	104270000	104280000	0	0	0	0	0	0	0	0	0	0	0	0	0	0	0	0	0	0	0	0	0	0	0	0	0	0	0	0	0	0	0	0	0	0	0	0	0	0	0	0	0	0	0	0	0
480	1	10429	104280000	104290000	0	0	0	0	0	0	0	0	0	0	0	0	0	0	0	0	0	0	0	0	0	0	0	0	0	0	0	0	0	0	0	0	0	0	0	0	0	0	0	0	0	0	0	0	0
481	1	1043	10420000	10430000	0	0	0	0	0	0	1	0	0	0	0	0	0	0	0	0	1.16649e-05	0	0	0	0	0	0	0	0	0	0	0	6.11658e-07	0	6.11658e-07	0	0	0	0	0	0	0	0	0	0	0	0	0	0
482	1	10430	104290000	104300000	0	0	0	0	0	0	0	0	0	0	0	0	0	0	0	0	0	0	0	0	0	0	0	0	0	0	0	0	0	0	0	0	0	0	0	0	0	0	0	0	0	0	0	0	0
483	1	10431	104300000	104310000	0	0	0	0	0	0	0	0	0	0	0	0	0	0	0	0	0	0	0	0	0	0	0	0	0	0	0	0	0	0	0	0	0	0	0	0	0	0	0	0	0	0	0	0	0
484	1	10432	104310000	104320000	0	0	0	1	0	0	0	0	0	0	0	0	0	5.21118e-06	0	0	0	0	0	0	0	0	0	0	0	0	0	0	0	1.35575e-06	1.35575e-06	0	0	0	0	0	0	0	0	0	0	0	0	0	0
485	1	10433	104320000	104330000	0	0	0	0	0	2	0	0	0	0	0	0	0	0	0	2.79357e-05	0	0	0	0	0	0	0	0	0	0	0	1.03578e-06	0	0	1.03578e-06	0	0	0	0	0	0	0	0	0	0	0	0	0	0
486	1	10434	104330000	104340000	0	0	0	0	0	5	0	0	0	0	0	0	0	0	0	6.98392e-05	0	0	0	0	0	0	0	0	0	0	0	2.58945e-06	0	0	2.58945e-06	0	0	0	0	0	0	0	0	0	0	0	0	0	0
487	1	10435	104340000	104350000	0	0	0	1	0	2	0	0	0	0	0	0	0	5.21118e-06	0	2.79357e-05	0	0	0	0	0	0	0	0	0	0	0	1.03578e-06	0	1.35575e-06	2.39153e-06	0	0	0	0	0	0	0	0	0	0	0	0	0	0
488	1	10436	104350000	104360000	0	0	0	0	0	0	0	0	0	0	0	0	0	0	0	0	0	0	0	0	0	0	0	0	0	0	0	0	0	0	0	0	0	0	0	0	0	0	0	0	0	0	0	0	0
489	1	10437	104360000	104370000	0	0	0	0	0	0	1	0	0	0	0	0	0	0	0	0	1.16649e-05	0	0	0	0	0	0	0	0	0	0	0	6.11658e-07	0	6.11658e-07	0	0	0	0	0	0	0	0	0	0	0	0	0	0
490	1	10438	104370000	104380000	0	0	0	1	0	1	1	0	0	0	0	0	0	5.21118e-06	0	1.39678e-05	1.16649e-05	0	0	0	0	0	0	0	0	0	0	5.17889e-07	6.11658e-07	1.35575e-06	2.4853e-06	0	0	0	0	0	0	0	0	0	0	0	0	0	0
491	1	10439	104380000	104390000	0	0	0	1	0	3	0	1	0	0	0	0	0	5.21118e-06	0	4.19035e-05	0	2.0859e-05	0	0	0	0	0	0	0	3.59838e-06	0	1.55367e-06	0	1.35575e-06	6.5078e-06	0	0	0	0	0	0	0	0	0	0	0	0	0	0
492	1	1044	10430000	10440000	0	0	0	1	0	2	0	0	0	0	0	0	0	5.21118e-06	0	2.79357e-05	0	0	0	0	0	0	0	0	0	0	0	1.03578e-06	0	1.35575e-06	2.39153e-06	0	0	0	0	0	0	0	0	0	0	0	0	0	0
493	1	10440	104390000	104400000	0	0	0	0	0	0	1	0	0	0	0	0	0	0	0	0	1.16649e-05	0	0	0	0	0	0	0	0	0	0	0	6.11658e-07	0	6.11658e-07	0	0	0	0	0	0	0	0	0	0	0	0	0	0
494	1	10441	104400000	104410000	0	0	0	0	0	0	1	0	0	0	0	0	0	0	0	0	1.16649e-05	0	0	0	0	0	0	0	0	0	0	0	6.11658e-07	0	6.11658e-07	0	0	0	0	0	0	0	0	0	0	0	0	0	0
495	1	10442	104410000	104420000	0	0	0	0	0	0	1	0	0	0	0	0	0	0	0	0	1.16649e-05	0	0	0	0	0	0	0	0	0	0	0	6.11658e-07	0	6.11658e-07	0	0	0	0	0	0	0	0	0	0	0	0	0	0
496	1	10443	104420000	104430000	0	0	0	0	0	0	0	0	0	0	0	0	0	0	0	0	0	0	0	0	0	0	0	0	0	0	0	0	0	0	0	0	0	0	0	0	0	0	0	0	0	0	0	0	0
497	1	10444	104430000	104440000	0	0	0	0	0	0	1	0	0	0	0	0	0	0	0	0	1.16649e-05	0	0	0	0	0	0	0	0	0	0	0	6.11658e-07	0	6.11658e-07	0	0	0	0	0	0	0	0	0	0	0	0	0	0
498	1	10445	104440000	104450000	0	0	0	0	0	0	0	1	0	0	0	0	0	0	0	0	0	2.0859e-05	0	0	0	0	0	0	0	3.59838e-06	0	0	0	0	3.59838e-06	0	0	0	0	0	0	0	0	0	0	0	0	0	0
499	1	10446	104450000	104460000	0	0	0	0	0	0	1	1	2	0	0	0	0	0	0	0	1.16649e-05	2.0859e-05	3.65303e-05	0	0	0	0	0	0	3.59838e-06	1.31478e-06	0	6.11658e-07	0	5.52482e-06	0	0	0	0	0	0	0	0	0	0	0	0	0	0
500	1	10447	104460000	104470000	0	0	0	0	0	0	1	0	0	0	0	0	0	0	0	0	1.16649e-05	0	0	0	0	0	0	0	0	0	0	0	6.11658e-07	0	6.11658e-07	0	0	0	0	0	0	0	0	0	0	0	0	0	0
501	1	10448	104470000	104480000	0	0	0	0	0	0	0	0	0	0	0	0	0	0	0	0	0	0	0	0	0	0	0	0	0	0	0	0	0	0	0	0	0	0	0	0	0	0	0	0	0	0	0	0	0
502	1	10449	104480000	104490000	0	0	0	0	0	0	0	0	0	0	0	0	0	0	0	0	0	0	0	0	0	0	0	0	0	0	0	0	0	0	0	0	0	0	0	0	0	0	0	0	0	0	0	0	0
503	1	1045	10440000	10450000	0	0	0	0	0	0	1	0	0	0	0	0	0	0	0	0	1.16649e-05	0	0	0	0	0	0	0	0	0	0	0	6.11658e-07	0	6.11658e-07	0	0	0	0	0	0	0	0	0	0	0	0	0	0
504	1	10450	104490000	104500000	0	0	0	0	0	0	0	0	0	0	0	0	0	0	0	0	0	0	0	0	0	0	0	0	0	0	0	0	0	0	0	0	0	0	0	0	0	0	0	0	0	0	0	0	0
505	1	10451	104500000	104510000	0	0	0	0	0	0	0	0	0	0	0	0	0	0	0	0	0	0	0	0	0	0	0	0	0	0	0	0	0	0	0	0	0	0	0	0	0	0	0	0	0	0	0	0	0
506	1	10452	104510000	104520000	0	0	0	0	0	1	0	0	0	0	0	0	0	0	0	1.39678e-05	0	0	0	0	0	0	0	0	0	0	0	5.17889e-07	0	0	5.17889e-07	0	0	0	0	0	0	0	0	0	0	0	0	0	0
507	1	10453	104520000	104530000	0	0	0	0	0	0	0	0	0	0	0	0	0	0	0	0	0	0	0	0	0	0	0	0	0	0	0	0	0	0	0	0	0	0	0	0	0	0	0	0	0	0	0	0	0
508	1	10454	104530000	104540000	0	0	0	0	0	0	0	0	0	0	0	0	0	0	0	0	0	0	0	0	0	0	0	0	0	0	0	0	0	0	0	0	0	0	0	0	0	0	0	0	0	0	0	0	0
509	1	10455	104540000	104550000	0	0	0	3	0	0	0	0	0	0	0	0	0	1.56335e-05	0	0	0	0	0	0	0	0	0	0	0	0	0	0	0	4.06725e-06	4.06725e-06	0	0	0	0	0	0	0	0	0	0	0	0	0	0
510	1	10456	104550000	104560000	0	0	0	0	0	0	0	0	0	0	0	0	0	0	0	0	0	0	0	0	0	0	0	0	0	0	0	0	0	0	0	0	0	0	0	0	0	0	0	0	0	0	0	0	0
511	1	10457	104560000	104570000	0	0	0	3	0	1	0	0	0	0	0	0	0	1.56335e-05	0	1.39678e-05	0	0	0	0	0	0	0	0	0	0	0	5.17889e-07	0	4.06725e-06	4.58513e-06	0	0	0	0	0	0	0	0	0	0	0	0	0	0
512	1	10458	104570000	104580000	0	0	0	1	0	0	0	0	0	0	0	0	0	5.21118e-06	0	0	0	0	0	0	0	0	0	0	0	0	0	0	0	1.35575e-06	1.35575e-06	0	0	0	0	0	0	0	0	0	0	0	0	0	0
513	1	10459	104580000	104590000	0	0	0	0	0	0	0	0	0	0	0	0	0	0	0	0	0	0	0	0	0	0	0	0	0	0	0	0	0	0	0	0	0	0	0	0	0	0	0	0	0	0	0	0	0
514	1	1046	10450000	10460000	0	0	0	0	0	0	1	0	0	0	0	0	0	0	0	0	1.16649e-05	0	0	0	0	0	0	0	0	0	0	0	6.11658e-07	0	6.11658e-07	0	0	0	0	0	0	0	0	0	0	0	0	0	0
515	1	10460	104590000	104600000	0	0	0	2	0	0	0	0	0	0	0	0	0	1.04224e-05	0	0	0	0	0	0	0	0	0	0	0	0	0	0	0	2.7115e-06	2.7115e-06	0	0	0	0	0	0	0	0	0	0	0	0	0	0
516	1	10461	104600000	104610000	0	0	0	0	0	0	0	0	0	0	0	0	0	0	0	0	0	0	0	0	0	0	0	0	0	0	0	0	0	0	0	0	0	0	0	0	0	0	0	0	0	0	0	0	0
517	1	10462	104610000	104620000	0	0	0	0	1	0	0	0	0	0	0	0	0	0	4.48209e-05	0	0	0	0	0	0	0	0	0	5.43748e-06	0	0	0	0	0	5.43748e-06	0	0	0	0	0	0	0	0	0	0	0	0	0	0
518	1	10463	104620000	104630000	0	0	0	1	0	0	0	0	0	0	0	0	0	5.21118e-06	0	0	0	0	0	0	0	0	0	0	0	0	0	0	0	1.35575e-06	1.35575e-06	0	0	0	0	0	0	0	0	0	0	0	0	0	0
519	1	10464	104630000	104640000	0	0	0	1	1	0	0	0	0	0	0	0	0	5.21118e-06	4.48209e-05	0	0	0	0	0	0	0	0	0	5.43748e-06	0	0	0	0	1.35575e-06	6.79323e-06	0	0	0	0	0	0	0	0	0	0	0	0	0	0
520	1	10465	104640000	104650000	0	0	0	1	0	0	0	0	0	0	0	0	0	5.21118e-06	0	0	0	0	0	0	0	0	0	0	0	0	0	0	0	1.35575e-06	1.35575e-06	0	0	0	0	0	0	0	0	0	0	0	0	0	0
521	1	10466	104650000	104660000	0	0	0	0	0	0	0	0	0	0	0	0	0	0	0	0	0	0	0	0	0	0	0	0	0	0	0	0	0	0	0	0	0	0	0	0	0	0	0	0	0	0	0	0	0
522	1	10467	104660000	104670000	0	0	0	0	0	2	0	0	0	0	0	0	0	0	0	2.79357e-05	0	0	0	0	0	0	0	0	0	0	0	1.03578e-06	0	0	1.03578e-06	0	0	0	0	0	0	0	0	0	0	0	0	0	0
523	1	10468	104670000	104680000	0	0	0	0	0	0	0	0	0	0	0	0	0	0	0	0	0	0	0	0	0	0	0	0	0	0	0	0	0	0	0	0	0	0	0	0	0	0	0	0	0	0	0	0	0
524	1	10469	104680000	104690000	0	0	0	0	0	0	0	0	0	0	0	0	0	0	0	0	0	0	0	0	0	0	0	0	0	0	0	0	0	0	0	0	0	0	0	0	0	0	0	0	0	0	0	0	0
525	1	1047	10460000	10470000	0	0	0	0	0	0	0	0	0	0	0	0	0	0	0	0	0	0	0	0	0	0	0	0	0	0	0	0	0	0	0	0	0	0	0	0	0	0	0	0	0	0	0	0	0
526	1	10470	104690000	104700000	0	0	0	0	1	0	0	0	0	0	0	0	0	0	4.48209e-05	0	0	0	0	0	0	0	0	0	5.43748e-06	0	0	0	0	0	5.43748e-06	0	0	0	0	0	0	0	0	0	0	0	0	0	0
527	1	10471	104700000	104710000	0	0	0	0	1	0	0	0	0	0	0	0	0	0	4.48209e-05	0	0	0	0	0	0	0	0	0	5.43748e-06	0	0	0	0	0	5.43748e-06	0	0	0	0	0	0	0	0	0	0	0	0	0	0
528	1	10472	104710000	104720000	0	0	0	0	1	0	0	0	0	0	0	0	0	0	4.48209e-05	0	0	0	0	0	0	0	0	0	5.43748e-06	0	0	0	0	0	5.43748e-06	0	0	0	0	0	0	0	0	0	0	0	0	0	0
529	1	10473	104720000	104730000	0	0	0	1	1	0	0	0	0	0	0	0	0	5.21118e-06	4.48209e-05	0	0	0	0	0	0	0	0	0	5.43748e-06	0	0	0	0	1.35575e-06	6.79323e-06	0	0	0	0	0	0	0	0	0	0	0	0	0	0
530	1	10474	104730000	104740000	0	0	0	3	0	3	0	0	0	0	0	0	0	1.56335e-05	0	4.19035e-05	0	0	0	0	0	0	0	0	0	0	0	1.55367e-06	0	4.06725e-06	5.62091e-06	0	0	0	0	0	0	0	0	0	0	0	0	0	0
531	1	10475	104740000	104750000	0	0	0	0	0	0	0	0	0	0	0	0	0	0	0	0	0	0	0	0	0	0	0	0	0	0	0	0	0	0	0	0	0	0	0	0	0	0	0	0	0	0	0	0	0
532	1	10476	104750000	104760000	0	0	0	0	0	0	2	0	0	0	0	0	0	0	0	0	2.33299e-05	0	0	0	0	0	0	0	0	0	0	0	1.22332e-06	0	1.22332e-06	0	0	0	0	0	0	0	0	0	0	0	0	0	0
533	1	10477	104760000	104770000	0	0	0	0	0	0	0	0	0	0	0	0	0	0	0	0	0	0	0	0	0	0	0	0	0	0	0	0	0	0	0	0	0	0	0	0	0	0	0	0	0	0	0	0	0
534	1	10478	104770000	104780000	0	0	0	0	0	0	0	0	0	0	0	0	0	0	0	0	0	0	0	0	0	0	0	0	0	0	0	0	0	0	0	0	0	0	0	0	0	0	0	0	0	0	0	0	0
535	1	10479	104780000	104790000	0	0	0	0	0	2	0	0	0	0	0	0	0	0	0	2.79357e-05	0	0	0	0	0	0	0	0	0	0	0	1.03578e-06	0	0	1.03578e-06	0	0	0	0	0	0	0	0	0	0	0	0	0	0
536	1	1048	10470000	10480000	0	0	0	1	1	0	0	0	0	0	0	0	0	5.21118e-06	4.48209e-05	0	0	0	0	0	0	0	0	0	5.43748e-06	0	0	0	0	1.35575e-06	6.79323e-06	0	0	0	0	0	0	0	0	0	0	0	0	0	0
537	1	10480	104790000	104800000	0	0	0	1	0	0	0	0	0	0	0	0	0	5.21118e-06	0	0	0	0	0	0	0	0	0	0	0	0	0	0	0	1.35575e-06	1.35575e-06	0	0	0	0	0	0	0	0	0	0	0	0	0	0
538	1	10481	104800000	104810000	0	0	0	1	0	0	0	0	0	0	0	0	0	5.21118e-06	0	0	0	0	0	0	0	0	0	0	0	0	0	0	0	1.35575e-06	1.35575e-06	0	0	0	0	0	0	0	0	0	0	0	0	0	0
539	1	10482	104810000	104820000	0	0	0	1	0	1	0	0	0	0	0	0	0	5.21118e-06	0	1.39678e-05	0	0	0	0	0	0	0	0	0	0	0	5.17889e-07	0	1.35575e-06	1.87364e-06	0	0	0	0	0	0	0	0	0	0	0	0	0	0
540	1	10483	104820000	104830000	0	0	0	0	0	0	0	0	0	0	0	0	0	0	0	0	0	0	0	0	0	0	0	0	0	0	0	0	0	0	0	0	0	0	0	0	0	0	0	0	0	0	0	0	0
541	1	10484	104830000	104840000	0	0	0	1	0	0	1	0	0	0	0	0	0	5.21118e-06	0	0	1.16649e-05	0	0	0	0	0	0	0	0	0	0	0	6.11658e-07	1.35575e-06	1.96741e-06	0	0	0	0	0	0	0	0	0	0	0	0	0	0
542	1	10485	104840000	104850000	0	0	0	0	0	0	1	0	0	0	0	0	0	0	0	0	1.16649e-05	0	0	0	0	0	0	0	0	0	0	0	6.11658e-07	0	6.11658e-07	0	0	0	0	0	0	0	0	0	0	0	0	0	0
543	1	10486	104850000	104860000	0	0	0	0	0	0	0	0	1	0	0	0	0	0	0	0	0	0	1.82652e-05	0	0	0	0	0	0	0	6.57388e-07	0	0	0	6.57388e-07	0	0	0	0	0	0	0	0	0	0	0	0	0	0
544	1	10487	104860000	104870000	0	0	0	1	0	2	0	0	0	0	0	0	0	5.21118e-06	0	2.79357e-05	0	0	0	0	0	0	0	0	0	0	0	1.03578e-06	0	1.35575e-06	2.39153e-06	0	0	0	0	0	0	0	0	0	0	0	0	0	0
545	1	10488	104870000	104880000	0	0	0	0	0	0	0	0	0	0	0	0	0	0	0	0	0	0	0	0	0	0	0	0	0	0	0	0	0	0	0	0	0	0	0	0	0	0	0	0	0	0	0	0	0
546	1	10489	104880000	104890000	0	0	0	0	0	0	0	0	0	0	0	0	0	0	0	0	0	0	0	0	0	0	0	0	0	0	0	0	0	0	0	0	0	0	0	0	0	0	0	0	0	0	0	0	0
547	1	1049	10480000	10490000	0	0	0	0	0	0	1	0	0	0	0	0	0	0	0	0	1.16649e-05	0	0	0	0	0	0	0	0	0	0	0	6.11658e-07	0	6.11658e-07	0	0	0	0	0	0	0	0	0	0	0	0	0	0
548	1	10490	104890000	104900000	0	0	0	0	0	0	0	0	1	0	0	0	0	0	0	0	0	0	1.82652e-05	0	0	0	0	0	0	0	6.57388e-07	0	0	0	6.57388e-07	0	0	0	0	0	0	0	0	0	0	0	0	0	0
549	1	10491	104900000	104910000	0	0	0	0	0	2	0	0	0	0	0	0	0	0	0	2.79357e-05	0	0	0	0	0	0	0	0	0	0	0	1.03578e-06	0	0	1.03578e-06	0	0	0	0	0	0	0	0	0	0	0	0	0	0
550	1	10492	104910000	104920000	0	0	0	0	0	0	2	0	0	0	0	0	0	0	0	0	2.33299e-05	0	0	0	0	0	0	0	0	0	0	0	1.22332e-06	0	1.22332e-06	0	0	0	0	0	0	0	0	0	0	0	0	0	0
551	1	10493	104920000	104930000	0	0	0	0	0	0	0	0	0	0	0	0	0	0	0	0	0	0	0	0	0	0	0	0	0	0	0	0	0	0	0	0	0	0	0	0	0	0	0	0	0	0	0	0	0
552	1	10494	104930000	104940000	0	0	0	0	0	0	0	0	0	0	0	0	0	0	0	0	0	0	0	0	0	0	0	0	0	0	0	0	0	0	0	0	0	0	0	0	0	0	0	0	0	0	0	0	0
553	1	10495	104940000	104950000	0	0	0	0	0	0	0	0	0	0	0	0	0	0	0	0	0	0	0	0	0	0	0	0	0	0	0	0	0	0	0	0	0	0	0	0	0	0	0	0	0	0	0	0	0
554	1	10496	104950000	104960000	0	0	0	0	0	0	0	0	0	0	0	0	0	0	0	0	0	0	0	0	0	0	0	0	0	0	0	0	0	0	0	0	0	0	0	0	0	0	0	0	0	0	0	0	0
555	1	10497	104960000	104970000	0	0	0	0	0	0	0	0	0	0	0	0	0	0	0	0	0	0	0	0	0	0	0	0	0	0	0	0	0	0	0	0	0	0	0	0	0	0	0	0	0	0	0	0	0
556	1	10498	104970000	104980000	0	0	0	0	0	0	0	0	0	0	0	0	0	0	0	0	0	0	0	0	0	0	0	0	0	0	0	0	0	0	0	0	0	0	0	0	0	0	0	0	0	0	0	0	0
557	1	10499	104980000	104990000	0	0	0	0	0	0	0	0	0	0	0	0	0	0	0	0	0	0	0	0	0	0	0	0	0	0	0	0	0	0	0	0	0	0	0	0	0	0	0	0	0	0	0	0	0
558	1	105	1040000	1050000	0	2	0	0	0	0	1	0	1	0	0	0.000785546	0	0	0	0	1.16649e-05	0	1.82652e-05	0	0	0	5.36209e-06	0	0	0	6.57388e-07	0	6.11658e-07	0	6.63113e-06	0	0	0	0	0	0	0	0	0	0	0	0	0	0
559	1	1050	10490000	10500000	0	0	0	1	0	0	0	0	0	0	0	0	0	5.21118e-06	0	0	0	0	0	0	0	0	0	0	0	0	0	0	0	1.35575e-06	1.35575e-06	0	0	0	0	0	0	0	0	0	0	0	0	0	0
560	1	10500	104990000	105000000	0	0	0	1	0	0	0	0	0	0	0	0	0	5.21118e-06	0	0	0	0	0	0	0	0	0	0	0	0	0	0	0	1.35575e-06	1.35575e-06	0	0	0	0	0	0	0	0	0	0	0	0	0	0
561	1	10501	105000000	105010000	0	0	0	0	0	2	0	0	0	0	0	0	0	0	0	2.79357e-05	0	0	0	0	0	0	0	0	0	0	0	1.03578e-06	0	0	1.03578e-06	0	0	0	0	0	0	0	0	0	0	0	0	0	0
562	1	10502	105010000	105020000	0	0	0	0	0	2	2	0	0	0	0	0	0	0	0	2.79357e-05	2.33299e-05	0	0	0	0	0	0	0	0	0	0	1.03578e-06	1.22332e-06	0	2.2591e-06	0	0	0	0	0	0	0	0	0	0	0	0	0	0
563	1	10503	105020000	105030000	0	0	0	0	0	0	1	0	1	0	0	0	0	0	0	0	1.16649e-05	0	1.82652e-05	0	0	0	0	0	0	0	6.57388e-07	0	6.11658e-07	0	1.26905e-06	0	0	0	0	0	0	0	0	0	0	0	0	0	0
564	1	10504	105030000	105040000	0	0	0	0	0	0	0	0	0	0	0	0	0	0	0	0	0	0	0	0	0	0	0	0	0	0	0	0	0	0	0	0	0	0	0	0	0	0	0	0	0	0	0	0	0
565	1	10505	105040000	105050000	0	0	0	0	0	0	0	0	0	0	0	0	0	0	0	0	0	0	0	0	0	0	0	0	0	0	0	0	0	0	0	0	0	0	0	0	0	0	0	0	0	0	0	0	0
566	1	10506	105050000	105060000	0	0	0	0	0	0	1	0	0	0	0	0	0	0	0	0	1.16649e-05	0	0	0	0	0	0	0	0	0	0	0	6.11658e-07	0	6.11658e-07	0	0	0	0	0	0	0	0	0	0	0	0	0	0
567	1	10507	105060000	105070000	0	0	0	4	0	0	0	0	0	0	0	0	0	2.08447e-05	0	0	0	0	0	0	0	0	0	0	0	0	0	0	0	5.42299e-06	5.42299e-06	0	0	0	0	0	0	0	0	0	0	0	0	0	0
568	1	10508	105070000	105080000	0	0	0	0	0	0	0	0	1	0	0	0	0	0	0	0	0	0	1.82652e-05	0	0	0	0	0	0	0	6.57388e-07	0	0	0	6.57388e-07	0	0	0	0	0	0	0	0	0	0	0	0	0	0
569	1	10509	105080000	105090000	0	0	0	0	0	0	0	0	0	0	0	0	0	0	0	0	0	0	0	0	0	0	0	0	0	0	0	0	0	0	0	0	0	0	0	0	0	0	0	0	0	0	0	0	0
570	1	1051	10500000	10510000	0	0	0	0	0	2	0	0	0	0	0	0	0	0	0	2.79357e-05	0	0	0	0	0	0	0	0	0	0	0	1.03578e-06	0	0	1.03578e-06	0	0	0	0	0	0	0	0	0	0	0	0	0	0
571	1	10510	105090000	105100000	0	0	0	0	0	1	0	0	0	0	0	0	0	0	0	1.39678e-05	0	0	0	0	0	0	0	0	0	0	0	5.17889e-07	0	0	5.17889e-07	0	0	0	0	0	0	0	0	0	0	0	0	0	0
572	1	10511	105100000	105110000	0	0	0	0	0	1	0	0	1	0	0	0	0	0	0	1.39678e-05	0	0	1.82652e-05	0	0	0	0	0	0	0	6.57388e-07	5.17889e-07	0	0	1.17528e-06	0	0	0	0	0	0	0	0	0	0	0	0	0	0
573	1	10512	105110000	105120000	0	0	0	1	0	0	1	0	0	0	0	0	0	5.21118e-06	0	0	1.16649e-05	0	0	0	0	0	0	0	0	0	0	0	6.11658e-07	1.35575e-06	1.96741e-06	0	0	0	0	0	0	0	0	0	0	0	0	0	0
574	1	10513	105120000	105130000	0	0	0	0	0	0	1	0	1	0	0	0	0	0	0	0	1.16649e-05	0	1.82652e-05	0	0	0	0	0	0	0	6.57388e-07	0	6.11658e-07	0	1.26905e-06	0	0	0	0	0	0	0	0	0	0	0	0	0	0
575	1	10514	105130000	105140000	0	0	0	0	0	0	0	0	0	0	0	0	0	0	0	0	0	0	0	0	0	0	0	0	0	0	0	0	0	0	0	0	0	0	0	0	0	0	0	0	0	0	0	0	0
576	1	10515	105140000	105150000	0	0	0	0	0	0	0	0	0	0	0	0	0	0	0	0	0	0	0	0	0	0	0	0	0	0	0	0	0	0	0	0	0	0	0	0	0	0	0	0	0	0	0	0	0
577	1	10516	105150000	105160000	0	0	0	0	0	0	0	0	0	0	0	0	0	0	0	0	0	0	0	0	0	0	0	0	0	0	0	0	0	0	0	0	0	0	0	0	0	0	0	0	0	0	0	0	0
578	1	10517	105160000	105170000	0	0	0	0	0	0	0	0	0	0	0	0	0	0	0	0	0	0	0	0	0	0	0	0	0	0	0	0	0	0	0	0	0	0	0	0	0	0	0	0	0	0	0	0	0
579	1	10518	105170000	105180000	0	0	0	0	0	0	0	0	1	0	0	0	0	0	0	0	0	0	1.82652e-05	0	0	0	0	0	0	0	6.57388e-07	0	0	0	6.57388e-07	0	0	0	0	0	0	0	0	0	0	0	0	0	0
580	1	10519	105180000	105190000	0	0	0	0	0	0	0	0	2	0	0	0	0	0	0	0	0	0	3.65303e-05	0	0	0	0	0	0	0	1.31478e-06	0	0	0	1.31478e-06	0	0	0	0	0	0	0	0	0	0	0	0	0	0
581	1	1052	10510000	10520000	0	0	0	0	0	0	0	0	0	0	0	0	0	0	0	0	0	0	0	0	0	0	0	0	0	0	0	0	0	0	0	0	0	0	0	0	0	0	0	0	0	0	0	0	0
582	1	10520	105190000	105200000	0	0	0	1	0	0	0	0	0	0	0	0	0	5.21118e-06	0	0	0	0	0	0	0	0	0	0	0	0	0	0	0	1.35575e-06	1.35575e-06	0	0	0	0	0	0	0	0	0	0	0	0	0	0
583	1	10521	105200000	105210000	0	0	0	1	0	0	0	0	0	0	0	0	0	5.21118e-06	0	0	0	0	0	0	0	0	0	0	0	0	0	0	0	1.35575e-06	1.35575e-06	0	0	0	0	0	0	0	0	0	0	0	0	0	0
584	1	10522	105210000	105220000	0	0	0	1	0	0	0	0	0	0	0	0	0	5.21118e-06	0	0	0	0	0	0	0	0	0	0	0	0	0	0	0	1.35575e-06	1.35575e-06	0	0	0	0	0	0	0	0	0	0	0	0	0	0
585	1	10523	105220000	105230000	0	0	0	0	0	0	0	0	0	0	0	0	0	0	0	0	0	0	0	0	0	0	0	0	0	0	0	0	0	0	0	0	0	0	0	0	0	0	0	0	0	0	0	0	0
586	1	10524	105230000	105240000	0	0	0	0	0	1	0	0	0	0	0	0	0	0	0	1.39678e-05	0	0	0	0	0	0	0	0	0	0	0	5.17889e-07	0	0	5.17889e-07	0	0	0	0	0	0	0	0	0	0	0	0	0	0
587	1	10525	105240000	105250000	0	0	0	0	0	0	2	0	0	0	0	0	0	0	0	0	2.33299e-05	0	0	0	0	0	0	0	0	0	0	0	1.22332e-06	0	1.22332e-06	0	0	0	0	0	0	0	0	0	0	0	0	0	0
588	1	10526	105250000	105260000	0	0	0	0	0	0	0	0	0	0	0	0	0	0	0	0	0	0	0	0	0	0	0	0	0	0	0	0	0	0	0	0	0	0	0	0	0	0	0	0	0	0	0	0	0
589	1	10527	105260000	105270000	0	0	0	0	0	0	0	0	0	0	0	0	0	0	0	0	0	0	0	0	0	0	0	0	0	0	0	0	0	0	0	0	0	0	0	0	0	0	0	0	0	0	0	0	0
590	1	10528	105270000	105280000	0	0	0	1	0	0	0	0	0	0	0	0	0	5.21118e-06	0	0	0	0	0	0	0	0	0	0	0	0	0	0	0	1.35575e-06	1.35575e-06	0	0	0	0	0	0	0	0	0	0	0	0	0	0
591	1	10529	105280000	105290000	0	0	0	1	0	0	0	0	1	0	0	0	0	5.21118e-06	0	0	0	0	1.82652e-05	0	0	0	0	0	0	0	6.57388e-07	0	0	1.35575e-06	2.01314e-06	0	0	0	0	0	0	0	0	0	0	0	0	0	0
592	1	1053	10520000	10530000	0	0	0	0	0	0	0	0	0	0	0	0	0	0	0	0	0	0	0	0	0	0	0	0	0	0	0	0	0	0	0	0	0	0	0	0	0	0	0	0	0	0	0	0	0
593	1	10530	105290000	105300000	0	0	0	0	0	0	0	0	0	0	0	0	0	0	0	0	0	0	0	0	0	0	0	0	0	0	0	0	0	0	0	0	0	0	0	0	0	0	0	0	0	0	0	0	0
594	1	10531	105300000	105310000	0	0	0	1	0	0	0	0	0	0	0	0	0	5.21118e-06	0	0	0	0	0	0	0	0	0	0	0	0	0	0	0	1.35575e-06	1.35575e-06	0	0	0	0	0	0	0	0	0	0	0	0	0	0
595	1	10532	105310000	105320000	0	0	0	0	0	0	0	0	0	0	0	0	0	0	0	0	0	0	0	0	0	0	0	0	0	0	0	0	0	0	0	0	0	0	0	0	0	0	0	0	0	0	0	0	0
596	1	10533	105320000	105330000	0	0	0	0	0	0	0	0	0	0	0	0	0	0	0	0	0	0	0	0	0	0	0	0	0	0	0	0	0	0	0	0	0	0	0	0	0	0	0	0	0	0	0	0	0
597	1	10534	105330000	105340000	0	0	0	0	1	0	1	0	0	0	0	0	0	0	4.48209e-05	0	1.16649e-05	0	0	0	0	0	0	0	5.43748e-06	0	0	0	6.11658e-07	0	6.04913e-06	0	0	0	0	0	0	0	0	0	0	0	0	0	0
598	1	10535	105340000	105350000	0	0	0	0	1	0	1	0	1	0	0	0	0	0	4.48209e-05	0	1.16649e-05	0	1.82652e-05	0	0	0	0	0	5.43748e-06	0	6.57388e-07	0	6.11658e-07	0	6.70652e-06	0	0	0	0	0	0	0	0	0	0	0	0	0	0
599	1	10536	105350000	105360000	0	0	0	0	0	0	0	0	1	0	0	0	0	0	0	0	0	0	1.82652e-05	0	0	0	0	0	0	0	6.57388e-07	0	0	0	6.57388e-07	0	0	0	0	0	0	0	0	0	0	0	0	0	0
600	1	10537	105360000	105370000	0	0	0	0	0	0	2	0	0	0	0	0	0	0	0	0	2.33299e-05	0	0	0	0	0	0	0	0	0	0	0	1.22332e-06	0	1.22332e-06	0	0	0	0	0	0	0	0	0	0	0	0	0	0
601	1	10538	105370000	105380000	0	0	0	1	0	0	0	0	0	0	0	0	0	5.21118e-06	0	0	0	0	0	0	0	0	0	0	0	0	0	0	0	1.35575e-06	1.35575e-06	0	0	0	0	0	0	0	0	0	0	0	0	0	0
602	1	10539	105380000	105390000	0	0	0	0	0	0	0	0	0	0	0	0	0	0	0	0	0	0	0	0	0	0	0	0	0	0	0	0	0	0	0	0	0	0	0	0	0	0	0	0	0	0	0	0	0
603	1	1054	10530000	10540000	0	0	0	0	0	0	0	0	0	0	0	0	0	0	0	0	0	0	0	0	0	0	0	0	0	0	0	0	0	0	0	0	0	0	0	0	0	0	0	0	0	0	0	0	0
604	1	10540	105390000	105400000	0	0	0	0	0	0	0	0	0	0	0	0	0	0	0	0	0	0	0	0	0	0	0	0	0	0	0	0	0	0	0	0	0	0	0	0	0	0	0	0	0	0	0	0	0
605	1	10541	105400000	105410000	0	0	0	0	1	1	0	0	0	0	0	0	0	0	4.48209e-05	1.39678e-05	0	0	0	0	0	0	0	0	5.43748e-06	0	0	5.17889e-07	0	0	5.95537e-06	0	0	0	0	0	0	0	0	0	0	0	0	0	0
606	1	10542	105410000	105420000	1	0	0	1	1	0	0	0	0	0	0.000429923	0	0	5.21118e-06	4.48209e-05	0	0	0	0	0	6.1227e-05	0	0	0	5.43748e-06	0	0	0	0	1.35575e-06	6.80202e-05	0	0	0	0	0	0	0	0	0	0	0	0	0	0
607	1	10543	105420000	105430000	0	0	0	0	0	1	2	0	0	0	0	0	0	0	0	1.39678e-05	2.33299e-05	0	0	0	0	0	0	0	0	0	0	5.17889e-07	1.22332e-06	0	1.74121e-06	0	0	0	0	0	0	0	0	0	0	0	0	0	0
608	1	10544	105430000	105440000	0	0	0	0	0	0	0	0	0	0	0	0	0	0	0	0	0	0	0	0	0	0	0	0	0	0	0	0	0	0	0	0	0	0	0	0	0	0	0	0	0	0	0	0	0
609	1	10545	105440000	105450000	0	0	0	0	0	0	0	0	0	0	0	0	0	0	0	0	0	0	0	0	0	0	0	0	0	0	0	0	0	0	0	0	0	0	0	0	0	0	0	0	0	0	0	0	0
610	1	10546	105450000	105460000	0	0	0	0	0	0	0	0	1	0	0	0	0	0	0	0	0	0	1.82652e-05	0	0	0	0	0	0	0	6.57388e-07	0	0	0	6.57388e-07	0	0	0	0	0	0	0	0	0	0	0	0	0	0
611	1	10547	105460000	105470000	0	0	0	0	0	1	0	0	0	0	0	0	0	0	0	1.39678e-05	0	0	0	0	0	0	0	0	0	0	0	5.17889e-07	0	0	5.17889e-07	0	0	0	0	0	0	0	0	0	0	0	0	0	0
612	1	10548	105470000	105480000	0	0	0	2	0	0	0	0	0	0	0	0	0	1.04224e-05	0	0	0	0	0	0	0	0	0	0	0	0	0	0	0	2.7115e-06	2.7115e-06	0	0	0	0	0	0	0	0	0	0	0	0	0	0
613	1	10549	105480000	105490000	0	0	0	1	0	0	0	0	0	0	0	0	0	5.21118e-06	0	0	0	0	0	0	0	0	0	0	0	0	0	0	0	1.35575e-06	1.35575e-06	0	0	0	0	0	0	0	0	0	0	0	0	0	0
614	1	1055	10540000	10550000	0	0	0	0	0	0	0	0	0	0	0	0	0	0	0	0	0	0	0	0	0	0	0	0	0	0	0	0	0	0	0	0	0	0	0	0	0	0	0	0	0	0	0	0	0
615	1	10550	105490000	105500000	0	0	0	1	0	1	0	0	0	0	0	0	0	5.21118e-06	0	1.39678e-05	0	0	0	0	0	0	0	0	0	0	0	5.17889e-07	0	1.35575e-06	1.87364e-06	0	0	0	0	0	0	0	0	0	0	0	0	0	0
616	1	10551	105500000	105510000	0	0	0	0	0	1	0	0	0	0	0	0	0	0	0	1.39678e-05	0	0	0	0	0	0	0	0	0	0	0	5.17889e-07	0	0	5.17889e-07	0	0	0	0	0	0	0	0	0	0	0	0	0	0
617	1	10552	105510000	105520000	0	0	0	0	0	0	0	0	0	0	0	0	0	0	0	0	0	0	0	0	0	0	0	0	0	0	0	0	0	0	0	0	0	0	0	0	0	0	0	0	0	0	0	0	0
618	1	10553	105520000	105530000	0	0	0	0	0	0	0	0	1	0	0	0	0	0	0	0	0	0	1.82652e-05	0	0	0	0	0	0	0	6.57388e-07	0	0	0	6.57388e-07	0	0	0	0	0	0	0	0	0	0	0	0	0	0
619	1	10554	105530000	105540000	0	0	0	0	0	1	0	0	0	0	0	0	0	0	0	1.39678e-05	0	0	0	0	0	0	0	0	0	0	0	5.17889e-07	0	0	5.17889e-07	0	0	0	0	0	0	0	0	0	0	0	0	0	0
620	1	10555	105540000	105550000	0	0	0	0	0	0	0	0	0	0	0	0	0	0	0	0	0	0	0	0	0	0	0	0	0	0	0	0	0	0	0	0	0	0	0	0	0	0	0	0	0	0	0	0	0
621	1	10556	105550000	105560000	0	0	0	0	0	0	0	1	0	0	0	0	0	0	0	0	0	2.0859e-05	0	0	0	0	0	0	0	3.59838e-06	0	0	0	0	3.59838e-06	0	0	0	0	0	0	0	0	0	0	0	0	0	0
622	1	10557	105560000	105570000	0	0	0	0	0	2	0	0	0	0	0	0	0	0	0	2.79357e-05	0	0	0	0	0	0	0	0	0	0	0	1.03578e-06	0	0	1.03578e-06	0	0	0	0	0	0	0	0	0	0	0	0	0	0
623	1	10558	105570000	105580000	0	0	0	1	0	0	0	4	0	0	0	0	0	5.21118e-06	0	0	0	8.34359e-05	0	0	0	0	0	0	0	1.43935e-05	0	0	0	1.35575e-06	1.57493e-05	0	0	0	0	0	0	0	0	0	0	0	0	0	0
624	1	10559	105580000	105590000	0	0	0	1	0	0	0	0	1	0	0	0	0	5.21118e-06	0	0	0	0	1.82652e-05	0	0	0	0	0	0	0	6.57388e-07	0	0	1.35575e-06	2.01314e-06	0	0	0	0	0	0	0	0	0	0	0	0	0	0
625	1	1056	10550000	10560000	0	0	0	0	0	0	1	0	0	0	0	0	0	0	0	0	1.16649e-05	0	0	0	0	0	0	0	0	0	0	0	6.11658e-07	0	6.11658e-07	0	0	0	0	0	0	0	0	0	0	0	0	0	0
626	1	10560	105590000	105600000	0	0	0	0	0	0	0	0	0	0	0	0	0	0	0	0	0	0	0	0	0	0	0	0	0	0	0	0	0	0	0	0	0	0	0	0	0	0	0	0	0	0	0	0	0
627	1	10561	105600000	105610000	0	0	0	1	1	0	0	0	0	0	0	0	0	5.21118e-06	4.48209e-05	0	0	0	0	0	0	0	0	0	5.43748e-06	0	0	0	0	1.35575e-06	6.79323e-06	0	0	0	0	0	0	0	0	0	0	0	0	0	0
628	1	10562	105610000	105620000	0	0	0	0	0	0	0	0	0	0	0	0	0	0	0	0	0	0	0	0	0	0	0	0	0	0	0	0	0	0	0	0	0	0	0	0	0	0	0	0	0	0	0	0	0
629	1	10563	105620000	105630000	0	0	0	3	0	0	0	0	0	0	0	0	0	1.56335e-05	0	0	0	0	0	0	0	0	0	0	0	0	0	0	0	4.06725e-06	4.06725e-06	0	0	0	0	0	0	0	0	0	0	0	0	0	0
630	1	10564	105630000	105640000	0	0	0	1	0	0	0	0	0	0	0	0	0	5.21118e-06	0	0	0	0	0	0	0	0	0	0	0	0	0	0	0	1.35575e-06	1.35575e-06	0	0	0	0	0	0	0	0	0	0	0	0	0	0
631	1	10565	105640000	105650000	0	0	0	1	0	0	0	0	0	0	0	0	0	5.21118e-06	0	0	0	0	0	0	0	0	0	0	0	0	0	0	0	1.35575e-06	1.35575e-06	0	0	0	0	0	0	0	0	0	0	0	0	0	0
632	1	10566	105650000	105660000	0	0	0	0	0	0	2	0	0	0	0	0	0	0	0	0	2.33299e-05	0	0	0	0	0	0	0	0	0	0	0	1.22332e-06	0	1.22332e-06	0	0	0	0	0	0	0	0	0	0	0	0	0	0
633	1	10567	105660000	105670000	0	0	0	0	0	0	0	0	0	0	0	0	0	0	0	0	0	0	0	0	0	0	0	0	0	0	0	0	0	0	0	0	0	0	0	0	0	0	0	0	0	0	0	0	0
634	1	10568	105670000	105680000	0	0	0	0	0	0	0	1	1	0	0	0	0	0	0	0	0	2.0859e-05	1.82652e-05	0	0	0	0	0	0	3.59838e-06	6.57388e-07	0	0	0	4.25577e-06	0	0	0	0	0	0	0	0	0	0	0	0	0	0
635	1	10569	105680000	105690000	0	0	0	0	0	2	0	0	5	0	0	0	0	0	0	2.79357e-05	0	0	9.13259e-05	0	0	0	0	0	0	0	3.28694e-06	1.03578e-06	0	0	4.32272e-06	0	0	0	0	0	0	0	0	0	0	0	0	0	0
636	1	1057	10560000	10570000	0	0	0	2	0	0	0	0	0	0	0	0	0	1.04224e-05	0	0	0	0	0	0	0	0	0	0	0	0	0	0	0	2.7115e-06	2.7115e-06	0	0	0	0	0	0	0	0	0	0	0	0	0	0
637	1	10570	105690000	105700000	0	0	0	1	0	0	1	0	0	0	0	0	0	5.21118e-06	0	0	1.16649e-05	0	0	0	0	0	0	0	0	0	0	0	6.11658e-07	1.35575e-06	1.96741e-06	0	0	0	0	0	0	0	0	0	0	0	0	0	0
638	1	10571	105700000	105710000	0	0	0	0	0	0	0	0	0	0	0	0	0	0	0	0	0	0	0	0	0	0	0	0	0	0	0	0	0	0	0	0	0	0	0	0	0	0	0	0	0	0	0	0	0
639	1	10572	105710000	105720000	0	0	0	0	0	0	1	1	0	0	0	0	0	0	0	0	1.16649e-05	2.0859e-05	0	0	0	0	0	0	0	3.59838e-06	0	0	6.11658e-07	0	4.21004e-06	0	0	0	0	0	0	0	0	0	0	0	0	0	0
640	1	10573	105720000	105730000	0	0	0	0	0	0	1	0	0	0	0	0	0	0	0	0	1.16649e-05	0	0	0	0	0	0	0	0	0	0	0	6.11658e-07	0	6.11658e-07	0	0	0	0	0	0	0	0	0	0	0	0	0	0
641	1	10574	105730000	105740000	0	0	0	0	0	0	0	0	0	0	0	0	0	0	0	0	0	0	0	0	0	0	0	0	0	0	0	0	0	0	0	0	0	0	0	0	0	0	0	0	0	0	0	0	0
642	1	10575	105740000	105750000	0	0	0	0	0	0	0	0	0	0	0	0	0	0	0	0	0	0	0	0	0	0	0	0	0	0	0	0	0	0	0	0	0	0	0	0	0	0	0	0	0	0	0	0	0
643	1	10576	105750000	105760000	0	0	0	2	0	0	0	0	0	0	0	0	0	1.04224e-05	0	0	0	0	0	0	0	0	0	0	0	0	0	0	0	2.7115e-06	2.7115e-06	0	0	0	0	0	0	0	0	0	0	0	0	0	0
644	1	10577	105760000	105770000	0	0	0	1	0	0	0	0	0	0	0	0	0	5.21118e-06	0	0	0	0	0	0	0	0	0	0	0	0	0	0	0	1.35575e-06	1.35575e-06	0	0	0	0	0	0	0	0	0	0	0	0	0	0
645	1	10578	105770000	105780000	0	0	0	1	0	0	2	0	0	0	0	0	0	5.21118e-06	0	0	2.33299e-05	0	0	0	0	0	0	0	0	0	0	0	1.22332e-06	1.35575e-06	2.57906e-06	0	0	0	0	0	0	0	0	0	0	0	0	0	0
646	1	10579	105780000	105790000	0	0	0	0	0	0	0	0	0	0	0	0	0	0	0	0	0	0	0	0	0	0	0	0	0	0	0	0	0	0	0	0	0	0	0	0	0	0	0	0	0	0	0	0	0
647	1	1058	10570000	10580000	0	0	0	0	0	0	2	0	2	0	0	0	0	0	0	0	2.33299e-05	0	3.65303e-05	0	0	0	0	0	0	0	1.31478e-06	0	1.22332e-06	0	2.53809e-06	0	0	0	0	0	0	0	0	0	0	0	0	0	0
648	1	10580	105790000	105800000	0	0	0	0	0	0	2	0	0	0	0	0	0	0	0	0	2.33299e-05	0	0	0	0	0	0	0	0	0	0	0	1.22332e-06	0	1.22332e-06	0	0	0	0	0	0	0	0	0	0	0	0	0	0
649	1	10581	105800000	105810000	0	0	0	0	0	2	0	0	0	0	0	0	0	0	0	2.79357e-05	0	0	0	0	0	0	0	0	0	0	0	1.03578e-06	0	0	1.03578e-06	0	0	0	0	0	0	0	0	0	0	0	0	0	0
650	1	10582	105810000	105820000	0	0	0	0	1	0	0	0	1	0	0	0	0	0	4.48209e-05	0	0	0	1.82652e-05	0	0	0	0	0	5.43748e-06	0	6.57388e-07	0	0	0	6.09486e-06	0	0	0	0	0	0	0	0	0	0	0	0	0	0
651	1	10583	105820000	105830000	0	0	0	0	1	0	0	0	0	0	0	0	0	0	4.48209e-05	0	0	0	0	0	0	0	0	0	5.43748e-06	0	0	0	0	0	5.43748e-06	0	0	0	0	0	0	0	0	0	0	0	0	0	0
652	1	10584	105830000	105840000	0	0	0	1	0	2	0	0	0	0	0	0	0	5.21118e-06	0	2.79357e-05	0	0	0	0	0	0	0	0	0	0	0	1.03578e-06	0	1.35575e-06	2.39153e-06	0	0	0	0	0	0	0	0	0	0	0	0	0	0
653	1	10585	105840000	105850000	0	0	0	1	0	0	0	0	0	0	0	0	0	5.21118e-06	0	0	0	0	0	0	0	0	0	0	0	0	0	0	0	1.35575e-06	1.35575e-06	0	0	0	0	0	0	0	0	0	0	0	0	0	0
654	1	10586	105850000	105860000	0	0	0	1	0	0	0	0	0	0	0	0	0	5.21118e-06	0	0	0	0	0	0	0	0	0	0	0	0	0	0	0	1.35575e-06	1.35575e-06	0	0	0	0	0	0	0	0	0	0	0	0	0	0
655	1	10587	105860000	105870000	0	0	0	4	0	0	0	0	0	0	0	0	0	2.08447e-05	0	0	0	0	0	0	0	0	0	0	0	0	0	0	0	5.42299e-06	5.42299e-06	0	0	0	0	0	0	0	0	0	0	0	0	0	0
656	1	10588	105870000	105880000	0	0	0	0	0	0	0	0	0	0	0	0	0	0	0	0	0	0	0	0	0	0	0	0	0	0	0	0	0	0	0	0	0	0	0	0	0	0	0	0	0	0	0	0	0
657	1	10589	105880000	105890000	0	0	0	0	0	2	1	0	0	0	0	0	0	0	0	2.79357e-05	1.16649e-05	0	0	0	0	0	0	0	0	0	0	1.03578e-06	6.11658e-07	0	1.64744e-06	0	0	0	0	0	0	0	0	0	0	0	0	0	0
658	1	1059	10580000	10590000	0	0	0	1	1	0	0	0	0	0	0	0	0	5.21118e-06	4.48209e-05	0	0	0	0	0	0	0	0	0	5.43748e-06	0	0	0	0	1.35575e-06	6.79323e-06	0	0	0	0	0	0	0	0	0	0	0	0	0	0
659	1	10590	105890000	105900000	0	0	0	1	0	0	2	0	0	0	0	0	0	5.21118e-06	0	0	2.33299e-05	0	0	0	0	0	0	0	0	0	0	0	1.22332e-06	1.35575e-06	2.57906e-06	0	0	0	0	0	0	0	0	0	0	0	0	0	0
660	1	10591	105900000	105910000	0	0	0	0	0	0	0	1	0	0	0	0	0	0	0	0	0	2.0859e-05	0	0	0	0	0	0	0	3.59838e-06	0	0	0	0	3.59838e-06	0	0	0	0	0	0	0	0	0	0	0	0	0	0
661	1	10592	105910000	105920000	0	0	0	2	0	0	0	0	1	0	0	0	0	1.04224e-05	0	0	0	0	1.82652e-05	0	0	0	0	0	0	0	6.57388e-07	0	0	2.7115e-06	3.36888e-06	0	0	0	0	0	0	0	0	0	0	0	0	0	0
662	1	10593	105920000	105930000	0	0	0	0	0	0	0	0	0	0	0	0	0	0	0	0	0	0	0	0	0	0	0	0	0	0	0	0	0	0	0	0	0	0	0	0	0	0	0	0	0	0	0	0	0
663	1	10594	105930000	105940000	0	0	0	3	0	0	0	0	2	0	0	0	0	1.56335e-05	0	0	0	0	3.65303e-05	0	0	0	0	0	0	0	1.31478e-06	0	0	4.06725e-06	5.38202e-06	0	0	0	0	0	0	0	0	0	0	0	0	0	0
664	1	10595	105940000	105950000	0	0	0	2	0	0	0	0	1	0	0	0	0	1.04224e-05	0	0	0	0	1.82652e-05	0	0	0	0	0	0	0	6.57388e-07	0	0	2.7115e-06	3.36888e-06	0	0	0	0	0	0	0	0	0	0	0	0	0	0
665	1	10596	105950000	105960000	0	0	0	0	0	0	0	0	0	0	0	0	0	0	0	0	0	0	0	0	0	0	0	0	0	0	0	0	0	0	0	0	0	0	0	0	0	0	0	0	0	0	0	0	0
666	1	10597	105960000	105970000	0	0	0	1	0	0	0	0	0	0	0	0	0	5.21118e-06	0	0	0	0	0	0	0	0	0	0	0	0	0	0	0	1.35575e-06	1.35575e-06	0	0	0	0	0	0	0	0	0	0	0	0	0	0
667	1	10598	105970000	105980000	0	0	0	0	0	0	0	0	0	0	0	0	0	0	0	0	0	0	0	0	0	0	0	0	0	0	0	0	0	0	0	0	0	0	0	0	0	0	0	0	0	0	0	0	0
668	1	10599	105980000	105990000	0	0	0	0	0	0	0	0	0	0	0	0	0	0	0	0	0	0	0	0	0	0	0	0	0	0	0	0	0	0	0	0	0	0	0	0	0	0	0	0	0	0	0	0	0
669	1	106	1050000	1060000	0	0	0	2	0	0	0	0	8	0	0	0	0	1.04224e-05	0	0	0	0	0.000146121	0	0	0	0	0	0	0	5.2591e-06	0	0	2.7115e-06	7.9706e-06	0	0	0	0	0	0	0	0	1	0	0	0	0	0
670	1	1060	10590000	10600000	0	0	0	0	0	0	0	0	0	0	0	0	0	0	0	0	0	0	0	0	0	0	0	0	0	0	0	0	0	0	0	0	0	0	0	0	0	0	0	0	0	0	0	0	0
671	1	10600	105990000	106000000	0	0	0	0	0	0	0	0	0	0	0	0	0	0	0	0	0	0	0	0	0	0	0	0	0	0	0	0	0	0	0	0	0	0	0	0	0	0	0	0	0	0	0	0	0
672	1	10601	106000000	106010000	0	0	0	0	0	0	0	0	0	0	0	0	0	0	0	0	0	0	0	0	0	0	0	0	0	0	0	0	0	0	0	0	0	0	0	0	0	0	0	0	0	0	0	0	0
673	1	10602	106010000	106020000	0	0	0	0	0	0	0	1	0	0	0	0	0	0	0	0	0	2.0859e-05	0	0	0	0	0	0	0	3.59838e-06	0	0	0	0	3.59838e-06	0	0	0	0	0	0	0	0	0	0	0	0	0	0
674	1	10603	106020000	106030000	0	0	0	0	0	0	2	0	0	0	0	0	0	0	0	0	2.33299e-05	0	0	0	0	0	0	0	0	0	0	0	1.22332e-06	0	1.22332e-06	0	0	0	0	0	0	0	0	0	0	0	0	0	0
675	1	10604	106030000	106040000	0	0	0	1	0	0	0	0	0	0	0	0	0	5.21118e-06	0	0	0	0	0	0	0	0	0	0	0	0	0	0	0	1.35575e-06	1.35575e-06	0	0	0	0	0	0	0	0	0	0	0	0	0	0
676	1	10605	106040000	106050000	0	0	0	0	0	0	0	0	0	0	0	0	0	0	0	0	0	0	0	0	0	0	0	0	0	0	0	0	0	0	0	0	0	0	0	0	0	0	0	0	0	0	0	0	0
677	1	10606	106050000	106060000	0	0	0	0	0	0	0	0	0	0	0	0	0	0	0	0	0	0	0	0	0	0	0	0	0	0	0	0	0	0	0	0	0	0	0	0	0	0	0	0	0	0	0	0	0
678	1	10607	106060000	106070000	0	0	0	0	0	0	0	0	0	0	0	0	0	0	0	0	0	0	0	0	0	0	0	0	0	0	0	0	0	0	0	0	0	0	0	0	0	0	0	0	0	0	0	0	0
679	1	10608	106070000	106080000	0	0	0	0	0	0	0	0	0	0	0	0	0	0	0	0	0	0	0	0	0	0	0	0	0	0	0	0	0	0	0	0	0	0	0	0	0	0	0	0	0	0	0	0	0
680	1	10609	106080000	106090000	0	0	0	0	0	0	0	0	0	0	0	0	0	0	0	0	0	0	0	0	0	0	0	0	0	0	0	0	0	0	0	0	0	0	0	0	0	0	0	0	0	0	0	0	0
681	1	1061	10600000	10610000	0	0	0	0	0	0	0	0	0	0	0	0	0	0	0	0	0	0	0	0	0	0	0	0	0	0	0	0	0	0	0	0	0	0	0	0	0	0	0	0	0	0	0	0	0
682	1	10610	106090000	106100000	0	0	0	0	0	0	0	0	0	0	0	0	0	0	0	0	0	0	0	0	0	0	0	0	0	0	0	0	0	0	0	0	0	0	0	0	0	0	0	0	0	0	0	0	0
683	1	10611	106100000	106110000	0	0	0	0	0	6	0	0	0	0	0	0	0	0	0	8.38071e-05	0	0	0	0	0	0	0	0	0	0	0	3.10734e-06	0	0	3.10734e-06	0	0	0	0	0	0	0	0	0	0	0	0	0	0
684	1	10612	106110000	106120000	0	0	0	0	0	2	0	0	5	0	0	0	0	0	0	2.79357e-05	0	0	9.13259e-05	0	0	0	0	0	0	0	3.28694e-06	1.03578e-06	0	0	4.32272e-06	0	0	0	0	0	0	0	0	0	0	0	0	0	0
685	1	10613	106120000	106130000	0	0	0	1	0	0	0	0	0	0	0	0	0	5.21118e-06	0	0	0	0	0	0	0	0	0	0	0	0	0	0	0	1.35575e-06	1.35575e-06	0	0	0	0	0	0	0	0	0	0	0	0	0	0
686	1	10614	106130000	106140000	0	0	0	1	0	0	0	0	0	0	0	0	0	5.21118e-06	0	0	0	0	0	0	0	0	0	0	0	0	0	0	0	1.35575e-06	1.35575e-06	0	0	0	0	0	0	0	0	0	0	0	0	0	0
687	1	10615	106140000	106150000	0	0	0	0	0	1	0	0	0	0	0	0	0	0	0	1.39678e-05	0	0	0	0	0	0	0	0	0	0	0	5.17889e-07	0	0	5.17889e-07	0	0	0	0	0	0	0	0	0	0	0	0	0	0
688	1	10616	106150000	106160000	0	0	0	1	0	0	0	0	1	0	0	0	0	5.21118e-06	0	0	0	0	1.82652e-05	0	0	0	0	0	0	0	6.57388e-07	0	0	1.35575e-06	2.01314e-06	0	0	0	0	0	0	0	0	0	0	0	0	0	0
689	1	10617	106160000	106170000	0	0	0	0	0	0	0	0	0	0	0	0	0	0	0	0	0	0	0	0	0	0	0	0	0	0	0	0	0	0	0	0	0	0	0	0	0	0	0	0	0	0	0	0	0
690	1	10618	106170000	106180000	0	0	0	0	0	2	0	0	0	0	0	0	0	0	0	2.79357e-05	0	0	0	0	0	0	0	0	0	0	0	1.03578e-06	0	0	1.03578e-06	0	0	0	0	0	0	0	0	0	0	0	0	0	0
691	1	10619	106180000	106190000	0	0	0	0	0	0	0	0	1	0	0	0	0	0	0	0	0	0	1.82652e-05	0	0	0	0	0	0	0	6.57388e-07	0	0	0	6.57388e-07	0	0	0	0	0	0	0	0	0	0	0	0	0	0
692	1	1062	10610000	10620000	0	0	0	0	0	0	0	0	0	0	0	0	0	0	0	0	0	0	0	0	0	0	0	0	0	0	0	0	0	0	0	0	0	0	0	0	0	0	0	0	0	0	0	0	0
693	1	10620	106190000	106200000	0	0	0	1	0	1	0	1	2	0	0	0	0	5.21118e-06	0	1.39678e-05	0	2.0859e-05	3.65303e-05	0	0	0	0	0	0	3.59838e-06	1.31478e-06	5.17889e-07	0	1.35575e-06	6.7868e-06	0	0	0	0	0	0	0	0	0	0	0	0	0	0
694	1	10621	106200000	106210000	0	0	0	0	0	0	0	0	0	0	0	0	0	0	0	0	0	0	0	0	0	0	0	0	0	0	0	0	0	0	0	0	0	0	0	0	0	0	0	0	0	0	0	0	0
695	1	10622	106210000	106220000	0	0	0	0	0	0	0	1	0	0	0	0	0	0	0	0	0	2.0859e-05	0	0	0	0	0	0	0	3.59838e-06	0	0	0	0	3.59838e-06	0	0	0	0	0	0	0	0	0	0	0	0	0	0
696	1	10623	106220000	106230000	0	0	0	0	0	0	0	0	0	0	0	0	0	0	0	0	0	0	0	0	0	0	0	0	0	0	0	0	0	0	0	0	0	0	0	0	0	0	0	0	0	0	0	0	0
697	1	10624	106230000	106240000	0	0	0	0	0	0	0	0	0	0	0	0	0	0	0	0	0	0	0	0	0	0	0	0	0	0	0	0	0	0	0	0	0	0	0	0	0	0	0	0	0	0	0	0	0
698	1	10625	106240000	106250000	0	0	0	0	0	0	0	0	0	0	0	0	0	0	0	0	0	0	0	0	0	0	0	0	0	0	0	0	0	0	0	0	0	0	0	0	0	0	0	0	0	0	0	0	0
699	1	10626	106250000	106260000	0	0	0	1	0	0	2	0	0	0	0	0	0	5.21118e-06	0	0	2.33299e-05	0	0	0	0	0	0	0	0	0	0	0	1.22332e-06	1.35575e-06	2.57906e-06	0	0	0	0	0	0	0	0	0	0	0	0	0	0
700	1	10627	106260000	106270000	0	0	0	0	0	0	0	0	0	0	0	0	0	0	0	0	0	0	0	0	0	0	0	0	0	0	0	0	0	0	0	0	0	0	0	0	0	0	0	0	0	0	0	0	0
701	1	10628	106270000	106280000	0	0	0	3	0	0	0	0	0	0	0	0	0	1.56335e-05	0	0	0	0	0	0	0	0	0	0	0	0	0	0	0	4.06725e-06	4.06725e-06	0	0	0	0	0	0	0	0	0	0	0	0	0	0
702	1	10629	106280000	106290000	0	0	0	2	0	0	0	0	0	0	0	0	0	1.04224e-05	0	0	0	0	0	0	0	0	0	0	0	0	0	0	0	2.7115e-06	2.7115e-06	0	0	0	0	0	0	0	0	0	0	0	0	0	0
703	1	1063	10620000	10630000	0	0	0	1	0	0	1	0	0	0	0	0	0	5.21118e-06	0	0	1.16649e-05	0	0	0	0	0	0	0	0	0	0	0	6.11658e-07	1.35575e-06	1.96741e-06	0	0	0	0	0	0	0	0	0	0	0	0	0	0
704	1	10630	106290000	106300000	0	0	0	0	1	0	0	0	0	0	0	0	0	0	4.48209e-05	0	0	0	0	0	0	0	0	0	5.43748e-06	0	0	0	0	0	5.43748e-06	0	0	0	0	0	0	0	0	0	0	0	0	0	0
705	1	10631	106300000	106310000	0	0	0	2	0	0	0	0	1	0	0	0	0	1.04224e-05	0	0	0	0	1.82652e-05	0	0	0	0	0	0	0	6.57388e-07	0	0	2.7115e-06	3.36888e-06	0	0	0	0	0	0	0	0	0	0	0	0	0	0
706	1	10632	106310000	106320000	0	0	0	0	0	1	0	0	0	0	0	0	0	0	0	1.39678e-05	0	0	0	0	0	0	0	0	0	0	0	5.17889e-07	0	0	5.17889e-07	0	0	0	0	0	0	0	0	0	0	0	0	0	0
707	1	10633	106320000	106330000	0	0	0	2	1	0	1	0	0	0	0	0	0	1.04224e-05	4.48209e-05	0	1.16649e-05	0	0	0	0	0	0	0	5.43748e-06	0	0	0	6.11658e-07	2.7115e-06	8.76063e-06	0	0	0	0	0	0	0	0	0	0	0	0	0	0
708	1	10634	106330000	106340000	0	0	0	1	0	0	1	0	0	0	0	0	0	5.21118e-06	0	0	1.16649e-05	0	0	0	0	0	0	0	0	0	0	0	6.11658e-07	1.35575e-06	1.96741e-06	0	0	0	0	0	0	0	0	0	0	0	0	0	0
709	1	10635	106340000	106350000	0	0	0	0	0	0	0	0	0	0	0	0	0	0	0	0	0	0	0	0	0	0	0	0	0	0	0	0	0	0	0	0	0	0	0	0	0	0	0	0	0	0	0	0	0
710	1	10636	106350000	106360000	0	0	0	2	0	2	0	0	0	0	0	0	0	1.04224e-05	0	2.79357e-05	0	0	0	0	0	0	0	0	0	0	0	1.03578e-06	0	2.7115e-06	3.74728e-06	0	0	0	0	0	0	0	0	0	0	0	0	0	0
711	1	10637	106360000	106370000	0	0	0	2	0	0	0	0	0	0	0	0	0	1.04224e-05	0	0	0	0	0	0	0	0	0	0	0	0	0	0	0	2.7115e-06	2.7115e-06	0	0	0	0	0	0	0	0	0	0	0	0	0	0
712	1	10638	106370000	106380000	0	0	0	1	0	0	0	0	0	0	0	0	0	5.21118e-06	0	0	0	0	0	0	0	0	0	0	0	0	0	0	0	1.35575e-06	1.35575e-06	0	0	0	0	0	0	0	0	0	0	0	0	0	0
713	1	10639	106380000	106390000	0	0	0	0	0	0	2	0	0	0	0	0	0	0	0	0	2.33299e-05	0	0	0	0	0	0	0	0	0	0	0	1.22332e-06	0	1.22332e-06	0	0	0	0	0	0	0	0	0	0	0	0	0	0
714	1	1064	10630000	10640000	0	0	0	0	0	0	1	0	0	0	0	0	0	0	0	0	1.16649e-05	0	0	0	0	0	0	0	0	0	0	0	6.11658e-07	0	6.11658e-07	0	0	0	0	0	0	0	0	0	0	0	0	0	0
715	1	10640	106390000	106400000	0	0	0	3	0	2	0	0	0	0	0	0	0	1.56335e-05	0	2.79357e-05	0	0	0	0	0	0	0	0	0	0	0	1.03578e-06	0	4.06725e-06	5.10302e-06	0	0	0	0	0	0	0	0	0	0	0	0	0	0
716	1	10641	106400000	106410000	0	0	0	0	0	0	0	0	0	0	0	0	0	0	0	0	0	0	0	0	0	0	0	0	0	0	0	0	0	0	0	0	0	0	0	0	0	0	0	0	0	0	0	0	0
717	1	10642	106410000	106420000	0	0	0	1	2	1	0	1	0	0	0	0	0	5.21118e-06	8.96419e-05	1.39678e-05	0	2.0859e-05	0	0	0	0	0	0	1.0875e-05	3.59838e-06	0	5.17889e-07	0	1.35575e-06	1.6347e-05	0	0	0	0	0	0	0	0	0	0	0	0	0	0
718	1	10643	106420000	106430000	0	0	0	3	4	0	0	0	0	0	0	0	0	1.56335e-05	0.000179284	0	0	0	0	0	0	0	0	0	2.17499e-05	0	0	0	0	4.06725e-06	2.58172e-05	0	0	0	0	1	0	0	0	0	0	0	0	0	0
719	1	10644	106430000	106440000	0	0	0	1	0	0	0	0	0	0	0	0	0	5.21118e-06	0	0	0	0	0	0	0	0	0	0	0	0	0	0	0	1.35575e-06	1.35575e-06	0	0	0	0	0	0	0	0	0	0	0	0	0	0
720	1	10645	106440000	106450000	0	0	0	0	0	0	0	0	0	0	0	0	0	0	0	0	0	0	0	0	0	0	0	0	0	0	0	0	0	0	0	0	0	0	0	0	0	0	0	0	0	0	0	0	0
721	1	10646	106450000	106460000	0	0	0	0	0	0	0	0	0	0	0	0	0	0	0	0	0	0	0	0	0	0	0	0	0	0	0	0	0	0	0	0	0	0	0	0	0	0	0	0	0	0	0	0	0
722	1	10647	106460000	106470000	0	0	0	0	0	1	0	0	0	0	0	0	0	0	0	1.39678e-05	0	0	0	0	0	0	0	0	0	0	0	5.17889e-07	0	0	5.17889e-07	0	0	0	0	0	0	0	0	0	0	0	0	0	0
723	1	10648	106470000	106480000	0	0	0	0	0	0	0	0	0	0	0	0	0	0	0	0	0	0	0	0	0	0	0	0	0	0	0	0	0	0	0	0	0	0	0	0	0	0	0	0	0	0	0	0	0
724	1	10649	106480000	106490000	0	0	0	0	0	2	4	0	0	0	0	0	0	0	0	2.79357e-05	4.66597e-05	0	0	0	0	0	0	0	0	0	0	1.03578e-06	2.44663e-06	0	3.48241e-06	0	0	0	0	0	0	0	0	0	0	0	0	0	0
725	1	1065	10640000	10650000	0	0	0	0	0	0	0	0	2	0	0	0	0	0	0	0	0	0	3.65303e-05	0	0	0	0	0	0	0	1.31478e-06	0	0	0	1.31478e-06	0	0	0	0	0	0	0	0	0	0	0	0	0	0
726	1	10650	106490000	106500000	0	0	0	0	0	0	0	0	0	0	0	0	0	0	0	0	0	0	0	0	0	0	0	0	0	0	0	0	0	0	0	0	0	0	0	0	0	0	0	0	0	0	0	0	0
727	1	10651	106500000	106510000	0	0	0	2	0	0	0	1	0	0	0	0	0	1.04224e-05	0	0	0	2.0859e-05	0	0	0	0	0	0	0	3.59838e-06	0	0	0	2.7115e-06	6.30988e-06	0	0	0	0	0	0	0	0	0	0	0	0	0	0
728	1	10652	106510000	106520000	0	0	0	0	0	0	0	0	0	0	0	0	0	0	0	0	0	0	0	0	0	0	0	0	0	0	0	0	0	0	0	0	0	0	0	0	0	0	0	0	0	0	0	0	0
729	1	10653	106520000	106530000	0	0	0	0	0	0	2	0	2	0	0	0	0	0	0	0	2.33299e-05	0	3.65303e-05	0	0	0	0	0	0	0	1.31478e-06	0	1.22332e-06	0	2.53809e-06	0	0	0	0	0	0	0	0	0	0	0	0	0	0
730	1	10654	106530000	106540000	0	2	0	0	0	1	0	0	0	0	0	0.000785546	0	0	0	1.39678e-05	0	0	0	0	0	0	5.36209e-06	0	0	0	0	5.17889e-07	0	0	5.87998e-06	0	0	0	0	0	0	0	0	0	0	0	0	0	0
731	1	10655	106540000	106550000	0	0	0	0	0	0	0	0	0	0	0	0	0	0	0	0	0	0	0	0	0	0	0	0	0	0	0	0	0	0	0	0	0	0	0	0	0	0	0	0	0	0	0	0	0
732	1	10656	106550000	106560000	0	0	0	0	0	0	0	1	0	0	0	0	0	0	0	0	0	2.0859e-05	0	0	0	0	0	0	0	3.59838e-06	0	0	0	0	3.59838e-06	0	0	0	0	0	0	0	0	0	0	0	0	0	0
733	1	10657	106560000	106570000	0	0	0	0	0	0	0	0	0	0	0	0	0	0	0	0	0	0	0	0	0	0	0	0	0	0	0	0	0	0	0	0	0	0	0	0	0	0	0	0	0	0	0	0	0
734	1	10658	106570000	106580000	0	0	0	0	0	0	0	0	1	0	0	0	0	0	0	0	0	0	1.82652e-05	0	0	0	0	0	0	0	6.57388e-07	0	0	0	6.57388e-07	0	0	0	0	0	0	0	0	0	0	0	0	0	0
735	1	10659	106580000	106590000	0	0	0	0	0	1	0	1	0	0	0	0	0	0	0	1.39678e-05	0	2.0859e-05	0	0	0	0	0	0	0	3.59838e-06	0	5.17889e-07	0	0	4.11627e-06	0	0	0	0	0	0	0	0	0	0	0	0	0	0
736	1	1066	10650000	10660000	0	0	0	0	0	2	0	0	0	0	0	0	0	0	0	2.79357e-05	0	0	0	0	0	0	0	0	0	0	0	1.03578e-06	0	0	1.03578e-06	0	0	0	0	0	0	0	0	0	0	0	0	0	0
737	1	10660	106590000	106600000	0	0	0	0	0	0	0	0	0	0	0	0	0	0	0	0	0	0	0	0	0	0	0	0	0	0	0	0	0	0	0	0	0	0	0	0	0	0	0	0	0	0	0	0	0
738	1	10661	106600000	106610000	0	0	0	1	0	0	0	0	0	0	0	0	0	5.21118e-06	0	0	0	0	0	0	0	0	0	0	0	0	0	0	0	1.35575e-06	1.35575e-06	0	0	0	0	0	0	0	0	0	0	0	0	0	0
739	1	10662	106610000	106620000	0	0	0	0	0	0	0	0	0	0	0	0	0	0	0	0	0	0	0	0	0	0	0	0	0	0	0	0	0	0	0	0	0	0	0	0	0	0	0	0	0	0	0	0	0
740	1	10663	106620000	106630000	0	0	0	0	0	0	0	0	0	0	0	0	0	0	0	0	0	0	0	0	0	0	0	0	0	0	0	0	0	0	0	0	0	0	0	0	0	0	0	0	0	0	0	0	0
741	1	10664	106630000	106640000	0	0	0	0	0	0	0	0	2	0	0	0	0	0	0	0	0	0	3.65303e-05	0	0	0	0	0	0	0	1.31478e-06	0	0	0	1.31478e-06	0	0	0	0	0	0	0	0	0	0	0	0	0	0
742	1	10665	106640000	106650000	0	0	0	0	0	0	0	0	0	0	0	0	0	0	0	0	0	0	0	0	0	0	0	0	0	0	0	0	0	0	0	0	0	0	0	0	0	0	0	0	0	0	0	0	0
743	1	10666	106650000	106660000	0	0	0	0	0	2	0	0	0	0	0	0	0	0	0	2.79357e-05	0	0	0	0	0	0	0	0	0	0	0	1.03578e-06	0	0	1.03578e-06	0	0	0	0	0	0	0	0	0	0	0	0	0	0
744	1	10667	106660000	106670000	0	0	0	1	0	0	0	0	0	0	0	0	0	5.21118e-06	0	0	0	0	0	0	0	0	0	0	0	0	0	0	0	1.35575e-06	1.35575e-06	0	0	0	0	0	0	0	0	0	0	0	0	0	0
745	1	10668	106670000	106680000	0	0	0	0	0	0	1	0	0	0	0	0	0	0	0	0	1.16649e-05	0	0	0	0	0	0	0	0	0	0	0	6.11658e-07	0	6.11658e-07	0	0	0	0	0	0	0	0	0	0	0	0	0	0
746	1	10669	106680000	106690000	0	0	0	1	0	0	0	0	1	0	0	0	0	5.21118e-06	0	0	0	0	1.82652e-05	0	0	0	0	0	0	0	6.57388e-07	0	0	1.35575e-06	2.01314e-06	0	0	0	0	0	0	0	0	0	0	0	0	0	0
747	1	1067	10660000	10670000	0	0	0	1	0	0	0	0	0	0	0	0	0	5.21118e-06	0	0	0	0	0	0	0	0	0	0	0	0	0	0	0	1.35575e-06	1.35575e-06	0	0	0	0	0	0	0	0	0	0	0	0	0	0
748	1	10670	106690000	106700000	0	0	0	1	0	2	0	0	0	0	0	0	0	5.21118e-06	0	2.79357e-05	0	0	0	0	0	0	0	0	0	0	0	1.03578e-06	0	1.35575e-06	2.39153e-06	0	0	0	0	0	0	0	0	0	0	0	0	0	0
749	1	10671	106700000	106710000	0	0	0	1	0	0	0	0	0	0	0	0	0	5.21118e-06	0	0	0	0	0	0	0	0	0	0	0	0	0	0	0	1.35575e-06	1.35575e-06	0	0	0	0	0	0	0	0	0	0	0	0	0	0
750	1	10672	106710000	106720000	0	0	0	0	0	0	0	0	2	0	0	0	0	0	0	0	0	0	3.65303e-05	0	0	0	0	0	0	0	1.31478e-06	0	0	0	1.31478e-06	0	0	0	0	0	0	0	0	0	0	0	0	0	0
751	1	10673	106720000	106730000	0	0	0	0	0	0	0	2	0	0	0	0	0	0	0	0	0	4.17179e-05	0	0	0	0	0	0	0	7.19677e-06	0	0	0	0	7.19677e-06	0	0	0	0	0	0	0	0	0	0	0	0	0	0
752	1	10674	106730000	106740000	0	0	0	0	0	0	0	0	0	0	0	0	0	0	0	0	0	0	0	0	0	0	0	0	0	0	0	0	0	0	0	0	0	0	0	0	0	0	0	0	0	0	0	0	0
753	1	10675	106740000	106750000	0	0	0	0	0	0	0	0	0	0	0	0	0	0	0	0	0	0	0	0	0	0	0	0	0	0	0	0	0	0	0	0	0	0	0	0	0	0	0	0	0	0	0	0	0
754	1	10676	106750000	106760000	0	0	0	1	0	0	0	0	1	0	0	0	0	5.21118e-06	0	0	0	0	1.82652e-05	0	0	0	0	0	0	0	6.57388e-07	0	0	1.35575e-06	2.01314e-06	0	0	0	0	0	0	0	0	0	0	0	0	0	0
755	1	10677	106760000	106770000	0	0	0	0	0	0	0	0	0	0	0	0	0	0	0	0	0	0	0	0	0	0	0	0	0	0	0	0	0	0	0	0	0	0	0	0	0	0	0	0	0	0	0	0	0
756	1	10678	106770000	106780000	0	0	0	0	0	0	0	0	0	0	0	0	0	0	0	0	0	0	0	0	0	0	0	0	0	0	0	0	0	0	0	0	0	0	0	0	0	0	0	0	0	0	0	0	0
757	1	10679	106780000	106790000	0	0	0	2	0	0	0	0	0	0	0	0	0	1.04224e-05	0	0	0	0	0	0	0	0	0	0	0	0	0	0	0	2.7115e-06	2.7115e-06	0	0	0	0	0	0	0	0	0	0	0	0	0	0
758	1	1068	10670000	10680000	0	0	0	2	0	0	0	0	0	0	0	0	0	1.04224e-05	0	0	0	0	0	0	0	0	0	0	0	0	0	0	0	2.7115e-06	2.7115e-06	0	0	0	0	0	0	0	0	0	0	0	0	0	0
759	1	10680	106790000	106800000	0	0	0	0	0	0	0	0	0	0	0	0	0	0	0	0	0	0	0	0	0	0	0	0	0	0	0	0	0	0	0	0	0	0	0	0	0	0	0	0	0	0	0	0	0
760	1	10681	106800000	106810000	0	0	0	1	0	0	0	0	0	0	0	0	0	5.21118e-06	0	0	0	0	0	0	0	0	0	0	0	0	0	0	0	1.35575e-06	1.35575e-06	0	0	0	0	0	0	0	0	0	0	0	0	0	0
761	1	10682	106810000	106820000	0	0	0	1	0	1	1	0	0	0	0	0	0	5.21118e-06	0	1.39678e-05	1.16649e-05	0	0	0	0	0	0	0	0	0	0	5.17889e-07	6.11658e-07	1.35575e-06	2.4853e-06	0	0	0	0	0	0	0	0	0	0	0	0	0	0
762	1	10683	106820000	106830000	0	0	0	0	0	0	0	0	0	0	0	0	0	0	0	0	0	0	0	0	0	0	0	0	0	0	0	0	0	0	0	0	0	0	0	0	0	0	0	0	0	0	0	0	0
763	1	10684	106830000	106840000	0	0	0	1	0	0	0	0	0	0	0	0	0	5.21118e-06	0	0	0	0	0	0	0	0	0	0	0	0	0	0	0	1.35575e-06	1.35575e-06	0	0	0	0	0	0	0	0	0	0	0	0	0	0
764	1	10685	106840000	106850000	0	0	0	1	0	0	0	0	0	0	0	0	0	5.21118e-06	0	0	0	0	0	0	0	0	0	0	0	0	0	0	0	1.35575e-06	1.35575e-06	0	0	0	0	0	0	0	0	0	0	0	0	0	0
765	1	10686	106850000	106860000	0	0	0	2	0	0	0	0	0	0	0	0	0	1.04224e-05	0	0	0	0	0	0	0	0	0	0	0	0	0	0	0	2.7115e-06	2.7115e-06	0	0	0	0	0	0	0	0	0	0	0	0	0	0
766	1	10687	106860000	106870000	0	0	0	2	0	0	0	0	2	0	0	0	0	1.04224e-05	0	0	0	0	3.65303e-05	0	0	0	0	0	0	0	1.31478e-06	0	0	2.7115e-06	4.02627e-06	0	0	0	0	0	0	0	0	0	0	0	0	0	0
767	1	10688	106870000	106880000	0	0	0	2	0	0	0	0	0	0	0	0	0	1.04224e-05	0	0	0	0	0	0	0	0	0	0	0	0	0	0	0	2.7115e-06	2.7115e-06	0	0	0	0	0	0	0	0	0	0	0	0	0	0
768	1	10689	106880000	106890000	0	0	0	0	0	0	0	0	0	0	0	0	0	0	0	0	0	0	0	0	0	0	0	0	0	0	0	0	0	0	0	0	0	0	0	0	0	0	0	0	0	0	0	0	0
769	1	1069	10680000	10690000	0	0	0	0	0	0	0	0	0	0	0	0	0	0	0	0	0	0	0	0	0	0	0	0	0	0	0	0	0	0	0	0	0	0	0	0	0	0	0	0	0	0	0	0	0
770	1	10690	106890000	106900000	0	0	0	1	0	0	0	0	0	0	0	0	0	5.21118e-06	0	0	0	0	0	0	0	0	0	0	0	0	0	0	0	1.35575e-06	1.35575e-06	0	0	0	0	0	0	0	0	0	0	0	0	0	0
771	1	10691	106900000	106910000	0	0	0	3	0	0	0	0	0	0	0	0	0	1.56335e-05	0	0	0	0	0	0	0	0	0	0	0	0	0	0	0	4.06725e-06	4.06725e-06	0	0	0	0	0	0	0	0	0	0	0	0	0	0
772	1	10692	106910000	106920000	0	0	0	0	0	2	0	0	2	0	0	0	0	0	0	2.79357e-05	0	0	3.65303e-05	0	0	0	0	0	0	0	1.31478e-06	1.03578e-06	0	0	2.35055e-06	0	0	0	0	0	0	0	0	0	0	0	0	0	0
773	1	10693	106920000	106930000	0	0	0	2	0	0	0	0	0	0	0	0	0	1.04224e-05	0	0	0	0	0	0	0	0	0	0	0	0	0	0	0	2.7115e-06	2.7115e-06	0	0	0	0	0	0	0	0	0	0	0	0	0	0
774	1	10694	106930000	106940000	0	0	0	8	0	0	0	0	0	0	0	0	0	4.16895e-05	0	0	0	0	0	0	0	0	0	0	0	0	0	0	0	1.0846e-05	1.0846e-05	0	0	0	0	0	0	0	0	0	0	0	0	0	0
775	1	10695	106940000	106950000	0	0	0	3	0	0	0	0	0	0	0	0	0	1.56335e-05	0	0	0	0	0	0	0	0	0	0	0	0	0	0	0	4.06725e-06	4.06725e-06	0	0	0	0	0	0	0	0	0	0	0	0	0	0
776	1	10696	106950000	106960000	0	0	0	4	0	0	0	0	0	0	0	0	0	2.08447e-05	0	0	0	0	0	0	0	0	0	0	0	0	0	0	0	5.42299e-06	5.42299e-06	0	0	0	0	0	0	0	0	0	0	0	0	0	0
777	1	10697	106960000	106970000	0	0	0	2	0	0	2	0	1	0	0	0	0	1.04224e-05	0	0	2.33299e-05	0	1.82652e-05	0	0	0	0	0	0	0	6.57388e-07	0	1.22332e-06	2.7115e-06	4.5922e-06	0	0	0	0	0	0	0	0	0	0	0	0	0	0
778	1	10698	106970000	106980000	0	0	0	0	0	0	2	0	0	0	0	0	0	0	0	0	2.33299e-05	0	0	0	0	0	0	0	0	0	0	0	1.22332e-06	0	1.22332e-06	0	0	0	0	0	0	0	0	0	0	0	0	0	0
779	1	10699	106980000	106990000	0	0	0	4	0	0	1	0	0	0	0	0	0	2.08447e-05	0	0	1.16649e-05	0	0	0	0	0	0	0	0	0	0	0	6.11658e-07	5.42299e-06	6.03465e-06	0	0	0	0	0	0	0	0	0	0	0	0	0	0
780	1	107	1060000	1070000	0	0	0	1	0	0	0	0	2	0	0	0	0	5.21118e-06	0	0	0	0	3.65303e-05	0	0	0	0	0	0	0	1.31478e-06	0	0	1.35575e-06	2.67052e-06	0	0	0	0	0	0	0	0	0	0	0	0	0	0
781	1	1070	10690000	10700000	0	0	0	0	0	3	1	0	0	0	0	0	0	0	0	4.19035e-05	1.16649e-05	0	0	0	0	0	0	0	0	0	0	1.55367e-06	6.11658e-07	0	2.16533e-06	0	0	0	0	0	0	0	0	0	0	0	0	0	0
782	1	10700	106990000	107000000	0	0	0	2	1	0	0	0	0	0	0	0	0	1.04224e-05	4.48209e-05	0	0	0	0	0	0	0	0	0	5.43748e-06	0	0	0	0	2.7115e-06	8.14897e-06	0	0	0	0	0	0	0	0	0	0	0	0	0	0
783	1	10701	107000000	107010000	0	0	0	2	0	0	0	0	0	0	0	0	0	1.04224e-05	0	0	0	0	0	0	0	0	0	0	0	0	0	0	0	2.7115e-06	2.7115e-06	0	0	0	0	0	0	0	0	0	0	0	0	0	0
784	1	10702	107010000	107020000	0	0	0	3	0	0	0	0	0	0	0	0	0	1.56335e-05	0	0	0	0	0	0	0	0	0	0	0	0	0	0	0	4.06725e-06	4.06725e-06	0	0	0	0	0	0	0	0	0	0	0	0	0	0
785	1	10703	107020000	107030000	0	0	0	4	0	0	0	0	0	0	0	0	0	2.08447e-05	0	0	0	0	0	0	0	0	0	0	0	0	0	0	0	5.42299e-06	5.42299e-06	0	0	0	0	0	0	0	0	0	0	0	0	0	0
786	1	10704	107030000	107040000	0	0	0	0	0	0	0	0	0	0	0	0	0	0	0	0	0	0	0	0	0	0	0	0	0	0	0	0	0	0	0	0	0	0	0	0	0	0	0	0	0	0	0	0	0
787	1	10705	107040000	107050000	0	0	0	0	0	0	2	0	0	0	0	0	0	0	0	0	2.33299e-05	0	0	0	0	0	0	0	0	0	0	0	1.22332e-06	0	1.22332e-06	0	0	0	0	0	0	0	0	0	0	0	0	0	0
788	1	10706	107050000	107060000	0	0	0	0	0	0	0	0	0	0	0	0	0	0	0	0	0	0	0	0	0	0	0	0	0	0	0	0	0	0	0	0	0	0	0	0	0	0	0	0	0	0	0	0	0
789	1	10707	107060000	107070000	0	0	0	0	2	0	0	0	0	0	0	0	0	0	8.96419e-05	0	0	0	0	0	0	0	0	0	1.0875e-05	0	0	0	0	0	1.0875e-05	0	0	0	0	0	0	0	0	0	0	0	0	0	0
790	1	10708	107070000	107080000	0	0	0	0	0	0	0	0	0	0	0	0	0	0	0	0	0	0	0	0	0	0	0	0	0	0	0	0	0	0	0	0	0	0	0	0	0	0	0	0	0	0	0	0	0
791	1	10709	107080000	107090000	0	0	0	1	0	0	0	0	0	0	0	0	0	5.21118e-06	0	0	0	0	0	0	0	0	0	0	0	0	0	0	0	1.35575e-06	1.35575e-06	0	0	0	0	0	0	0	0	0	0	0	0	0	0
792	1	1071	10700000	10710000	0	0	0	1	0	0	0	0	0	0	0	0	0	5.21118e-06	0	0	0	0	0	0	0	0	0	0	0	0	0	0	0	1.35575e-06	1.35575e-06	0	0	0	0	0	0	0	0	0	0	0	0	0	0
793	1	10710	107090000	107100000	0	0	0	0	0	0	1	0	0	0	0	0	0	0	0	0	1.16649e-05	0	0	0	0	0	0	0	0	0	0	0	6.11658e-07	0	6.11658e-07	0	0	0	0	0	0	0	0	0	0	0	0	0	0
794	1	10711	107100000	107110000	0	0	0	0	0	0	1	0	0	0	0	0	0	0	0	0	1.16649e-05	0	0	0	0	0	0	0	0	0	0	0	6.11658e-07	0	6.11658e-07	0	0	0	0	0	0	0	0	0	0	0	0	0	0
795	1	10712	107110000	107120000	0	0	0	1	1	1	0	0	0	0	0	0	0	5.21118e-06	4.48209e-05	1.39678e-05	0	0	0	0	0	0	0	0	5.43748e-06	0	0	5.17889e-07	0	1.35575e-06	7.31111e-06	0	0	0	0	0	0	0	0	0	0	0	0	0	0
796	1	10713	107120000	107130000	0	0	0	0	0	0	1	0	0	0	0	0	0	0	0	0	1.16649e-05	0	0	0	0	0	0	0	0	0	0	0	6.11658e-07	0	6.11658e-07	0	0	0	0	0	0	0	0	0	0	0	0	0	0
797	1	10714	107130000	107140000	0	0	0	0	1	0	0	0	0	0	0	0	0	0	4.48209e-05	0	0	0	0	0	0	0	0	0	5.43748e-06	0	0	0	0	0	5.43748e-06	0	0	0	0	0	0	0	0	0	0	0	0	0	0
798	1	10715	107140000	107150000	0	0	0	0	0	0	0	0	0	0	0	0	0	0	0	0	0	0	0	0	0	0	0	0	0	0	0	0	0	0	0	0	0	0	0	0	0	0	0	0	0	0	0	0	0
799	1	10716	107150000	107160000	0	0	0	1	0	0	0	0	0	0	0	0	0	5.21118e-06	0	0	0	0	0	0	0	0	0	0	0	0	0	0	0	1.35575e-06	1.35575e-06	0	0	0	0	0	0	0	0	0	0	0	0	0	0
800	1	10717	107160000	107170000	0	0	0	0	0	0	0	0	0	0	0	0	0	0	0	0	0	0	0	0	0	0	0	0	0	0	0	0	0	0	0	0	0	0	0	0	0	0	0	0	0	0	0	0	0
801	1	10718	107170000	107180000	0	0	0	0	0	0	0	0	0	0	0	0	0	0	0	0	0	0	0	0	0	0	0	0	0	0	0	0	0	0	0	0	0	0	0	0	0	0	0	0	0	0	0	0	0
802	1	10719	107180000	107190000	0	0	0	1	0	0	0	0	0	0	0	0	0	5.21118e-06	0	0	0	0	0	0	0	0	0	0	0	0	0	0	0	1.35575e-06	1.35575e-06	0	0	0	0	0	0	0	0	0	0	0	0	0	0
803	1	1072	10710000	10720000	0	0	0	0	0	0	0	0	0	0	0	0	0	0	0	0	0	0	0	0	0	0	0	0	0	0	0	0	0	0	0	0	0	0	0	0	0	0	0	0	0	0	0	0	0
804	1	10720	107190000	107200000	0	0	0	1	0	0	0	0	0	0	0	0	0	5.21118e-06	0	0	0	0	0	0	0	0	0	0	0	0	0	0	0	1.35575e-06	1.35575e-06	0	0	0	0	0	0	0	0	0	0	0	0	0	0
805	1	10721	107200000	107210000	0	0	0	1	0	0	0	0	0	0	0	0	0	5.21118e-06	0	0	0	0	0	0	0	0	0	0	0	0	0	0	0	1.35575e-06	1.35575e-06	0	0	0	0	0	0	0	0	0	0	0	0	0	0
806	1	10722	107210000	107220000	0	0	0	0	0	0	0	0	0	0	0	0	0	0	0	0	0	0	0	0	0	0	0	0	0	0	0	0	0	0	0	0	0	0	0	0	0	0	0	0	0	0	0	0	0
807	1	10723	107220000	107230000	0	0	0	0	0	0	0	0	1	0	0	0	0	0	0	0	0	0	1.82652e-05	0	0	0	0	0	0	0	6.57388e-07	0	0	0	6.57388e-07	0	0	0	0	0	0	0	0	0	0	0	0	0	0
808	1	10724	107230000	107240000	0	0	0	1	0	0	0	0	0	0	0	0	0	5.21118e-06	0	0	0	0	0	0	0	0	0	0	0	0	0	0	0	1.35575e-06	1.35575e-06	0	0	0	0	0	0	0	0	0	0	0	0	0	0
809	1	10725	107240000	107250000	0	0	0	0	0	0	0	0	0	0	0	0	0	0	0	0	0	0	0	0	0	0	0	0	0	0	0	0	0	0	0	0	0	0	0	0	0	0	0	0	0	0	0	0	0
810	1	10726	107250000	107260000	0	0	0	0	0	0	0	0	2	0	0	0	0	0	0	0	0	0	3.65303e-05	0	0	0	0	0	0	0	1.31478e-06	0	0	0	1.31478e-06	0	0	0	0	0	0	0	0	0	0	0	0	0	0
811	1	10727	107260000	107270000	0	0	0	0	0	0	0	0	1	0	0	0	0	0	0	0	0	0	1.82652e-05	0	0	0	0	0	0	0	6.57388e-07	0	0	0	6.57388e-07	0	0	0	0	0	0	0	0	0	0	0	0	0	0
812	1	10728	107270000	107280000	0	0	0	0	0	0	2	0	0	0	0	0	0	0	0	0	2.33299e-05	0	0	0	0	0	0	0	0	0	0	0	1.22332e-06	0	1.22332e-06	0	0	0	0	0	0	0	0	0	0	0	0	0	0
813	1	10729	107280000	107290000	0	0	0	0	0	1	0	0	1	0	0	0	0	0	0	1.39678e-05	0	0	1.82652e-05	0	0	0	0	0	0	0	6.57388e-07	5.17889e-07	0	0	1.17528e-06	0	0	0	0	0	0	0	0	0	0	0	0	0	0
814	1	1073	10720000	10730000	0	0	0	3	0	0	0	0	0	0	0	0	0	1.56335e-05	0	0	0	0	0	0	0	0	0	0	0	0	0	0	0	4.06725e-06	4.06725e-06	0	0	0	0	0	0	0	0	0	0	0	0	0	0
815	1	10730	107290000	107300000	0	0	0	0	0	1	0	0	0	0	0	0	0	0	0	1.39678e-05	0	0	0	0	0	0	0	0	0	0	0	5.17889e-07	0	0	5.17889e-07	0	0	0	0	0	0	0	0	0	0	0	0	0	0
816	1	10731	107300000	107310000	0	0	0	0	0	0	0	0	0	0	0	0	0	0	0	0	0	0	0	0	0	0	0	0	0	0	0	0	0	0	0	0	0	0	0	0	0	0	0	0	0	0	0	0	0
817	1	10732	107310000	107320000	0	0	0	0	0	0	0	0	0	0	0	0	0	0	0	0	0	0	0	0	0	0	0	0	0	0	0	0	0	0	0	0	0	0	0	0	0	0	0	0	0	0	0	0	0
818	1	10733	107320000	107330000	0	0	0	0	0	0	1	0	0	0	0	0	0	0	0	0	1.16649e-05	0	0	0	0	0	0	0	0	0	0	0	6.11658e-07	0	6.11658e-07	0	0	0	0	0	0	0	0	0	0	0	0	0	0
819	1	10734	107330000	107340000	0	0	0	0	1	0	0	0	0	0	0	0	0	0	4.48209e-05	0	0	0	0	0	0	0	0	0	5.43748e-06	0	0	0	0	0	5.43748e-06	0	0	0	0	0	0	0	0	0	0	0	0	0	0
820	1	10735	107340000	107350000	0	0	0	0	1	0	0	0	0	0	0	0	0	0	4.48209e-05	0	0	0	0	0	0	0	0	0	5.43748e-06	0	0	0	0	0	5.43748e-06	0	0	0	0	0	0	0	0	0	0	0	0	0	0
821	1	10736	107350000	107360000	0	0	0	0	0	0	0	0	0	0	0	0	0	0	0	0	0	0	0	0	0	0	0	0	0	0	0	0	0	0	0	0	0	0	0	0	0	0	0	0	0	0	0	0	0
822	1	10737	107360000	107370000	0	0	0	0	0	0	0	0	0	0	0	0	0	0	0	0	0	0	0	0	0	0	0	0	0	0	0	0	0	0	0	0	0	0	0	0	0	0	0	0	0	0	0	0	0
823	1	10738	107370000	107380000	0	0	0	0	0	0	0	0	0	0	0	0	0	0	0	0	0	0	0	0	0	0	0	0	0	0	0	0	0	0	0	0	0	0	0	0	0	0	0	0	0	0	0	0	0
824	1	10739	107380000	107390000	0	0	0	0	0	0	0	0	1	0	0	0	0	0	0	0	0	0	1.82652e-05	0	0	0	0	0	0	0	6.57388e-07	0	0	0	6.57388e-07	0	0	0	0	0	0	0	0	0	0	0	0	0	0
825	1	1074	10730000	10740000	0	0	0	3	0	0	2	0	0	0	0	0	0	1.56335e-05	0	0	2.33299e-05	0	0	0	0	0	0	0	0	0	0	0	1.22332e-06	4.06725e-06	5.29056e-06	0	0	0	0	0	0	0	0	0	0	0	0	0	0
826	1	10740	107390000	107400000	0	0	0	0	0	0	0	0	0	0	0	0	0	0	0	0	0	0	0	0	0	0	0	0	0	0	0	0	0	0	0	0	0	0	0	0	0	0	0	0	0	0	0	0	0
827	1	10741	107400000	107410000	0	0	0	1	0	0	0	0	0	0	0	0	0	5.21118e-06	0	0	0	0	0	0	0	0	0	0	0	0	0	0	0	1.35575e-06	1.35575e-06	0	0	0	0	0	0	0	0	0	0	0	0	0	0
828	1	10742	107410000	107420000	0	0	0	1	0	0	0	0	0	0	0	0	0	5.21118e-06	0	0	0	0	0	0	0	0	0	0	0	0	0	0	0	1.35575e-06	1.35575e-06	0	0	0	0	0	0	0	0	0	0	0	0	0	0
829	1	10743	107420000	107430000	0	0	0	0	0	0	0	0	0	0	0	0	0	0	0	0	0	0	0	0	0	0	0	0	0	0	0	0	0	0	0	0	0	0	0	0	0	0	0	0	0	0	0	0	0
830	1	10744	107430000	107440000	0	0	0	0	0	0	0	0	1	0	0	0	0	0	0	0	0	0	1.82652e-05	0	0	0	0	0	0	0	6.57388e-07	0	0	0	6.57388e-07	0	0	0	0	0	0	0	0	0	0	0	0	0	0
831	1	10745	107440000	107450000	0	0	0	1	0	0	0	0	0	0	0	0	0	5.21118e-06	0	0	0	0	0	0	0	0	0	0	0	0	0	0	0	1.35575e-06	1.35575e-06	0	0	0	0	0	0	0	0	0	0	0	0	0	0
832	1	10746	107450000	107460000	0	0	0	1	0	0	0	0	0	0	0	0	0	5.21118e-06	0	0	0	0	0	0	0	0	0	0	0	0	0	0	0	1.35575e-06	1.35575e-06	0	0	0	0	0	0	0	0	0	0	0	0	0	0
833	1	10747	107460000	107470000	0	0	0	0	0	0	0	0	0	0	0	0	0	0	0	0	0	0	0	0	0	0	0	0	0	0	0	0	0	0	0	0	0	0	0	0	0	0	0	0	0	0	0	0	0
834	1	10748	107470000	107480000	0	0	0	1	0	0	0	0	0	0	0	0	0	5.21118e-06	0	0	0	0	0	0	0	0	0	0	0	0	0	0	0	1.35575e-06	1.35575e-06	0	0	0	0	0	0	0	0	0	0	0	0	0	0
835	1	10749	107480000	107490000	0	0	0	0	0	2	0	0	0	0	0	0	0	0	0	2.79357e-05	0	0	0	0	0	0	0	0	0	0	0	1.03578e-06	0	0	1.03578e-06	0	0	0	0	0	0	0	0	0	0	0	0	0	0
836	1	1075	10740000	10750000	0	0	0	2	0	0	0	0	0	0	0	0	0	1.04224e-05	0	0	0	0	0	0	0	0	0	0	0	0	0	0	0	2.7115e-06	2.7115e-06	0	0	0	0	0	0	0	0	0	0	0	0	0	0
837	1	10750	107490000	107500000	0	0	0	1	0	0	0	0	0	0	0	0	0	5.21118e-06	0	0	0	0	0	0	0	0	0	0	0	0	0	0	0	1.35575e-06	1.35575e-06	0	0	0	0	0	0	0	0	0	0	0	0	0	0
838	1	10751	107500000	107510000	0	0	0	1	0	0	0	0	0	0	0	0	0	5.21118e-06	0	0	0	0	0	0	0	0	0	0	0	0	0	0	0	1.35575e-06	1.35575e-06	0	0	0	0	0	0	0	0	0	0	0	0	0	0
839	1	10752	107510000	107520000	0	0	0	0	0	0	0	0	0	0	0	0	0	0	0	0	0	0	0	0	0	0	0	0	0	0	0	0	0	0	0	0	0	0	0	0	0	0	0	0	0	0	0	0	0
840	1	10753	107520000	107530000	0	0	0	0	0	0	0	0	0	0	0	0	0	0	0	0	0	0	0	0	0	0	0	0	0	0	0	0	0	0	0	0	0	0	0	0	0	0	0	0	0	0	0	0	0
841	1	10754	107530000	107540000	0	0	0	0	0	0	0	0	0	0	0	0	0	0	0	0	0	0	0	0	0	0	0	0	0	0	0	0	0	0	0	0	0	0	0	0	0	0	0	0	0	0	0	0	0
842	1	10755	107540000	107550000	0	0	0	0	0	0	0	0	0	0	0	0	0	0	0	0	0	0	0	0	0	0	0	0	0	0	0	0	0	0	0	0	0	0	0	0	0	0	0	0	0	0	0	0	0
843	1	10756	107550000	107560000	0	0	0	0	0	0	0	0	1	0	0	0	0	0	0	0	0	0	1.82652e-05	0	0	0	0	0	0	0	6.57388e-07	0	0	0	6.57388e-07	0	0	0	0	0	0	0	0	0	0	0	0	0	0
844	1	10757	107560000	107570000	0	0	0	0	0	0	0	0	2	0	0	0	0	0	0	0	0	0	3.65303e-05	0	0	0	0	0	0	0	1.31478e-06	0	0	0	1.31478e-06	0	0	0	0	0	0	0	0	0	0	0	0	0	0
845	1	10758	107570000	107580000	0	0	0	1	0	0	0	0	1	0	0	0	0	5.21118e-06	0	0	0	0	1.82652e-05	0	0	0	0	0	0	0	6.57388e-07	0	0	1.35575e-06	2.01314e-06	0	0	0	0	0	0	0	0	0	0	0	0	0	0
846	1	10759	107580000	107590000	0	0	0	0	0	0	0	0	0	0	0	0	0	0	0	0	0	0	0	0	0	0	0	0	0	0	0	0	0	0	0	0	0	0	0	0	0	0	0	0	0	0	0	0	0
847	1	1076	10750000	10760000	0	0	0	0	0	1	3	0	0	0	0	0	0	0	0	1.39678e-05	3.49948e-05	0	0	0	0	0	0	0	0	0	0	5.17889e-07	1.83497e-06	0	2.35286e-06	0	0	0	0	0	0	0	0	0	0	0	0	0	0
848	1	10760	107590000	107600000	0	0	0	0	0	0	0	0	0	0	0	0	0	0	0	0	0	0	0	0	0	0	0	0	0	0	0	0	0	0	0	0	0	0	0	0	0	0	0	0	0	0	0	0	0
849	1	10761	107600000	107610000	0	0	0	0	0	0	0	0	0	0	0	0	0	0	0	0	0	0	0	0	0	0	0	0	0	0	0	0	0	0	0	0	0	0	0	0	0	0	0	0	0	0	0	0	0
850	1	10762	107610000	107620000	0	0	0	2	0	0	0	0	0	0	0	0	0	1.04224e-05	0	0	0	0	0	0	0	0	0	0	0	0	0	0	0	2.7115e-06	2.7115e-06	0	0	0	0	0	0	0	0	0	0	0	0	0	0
851	1	10763	107620000	107630000	0	0	0	0	0	0	0	0	0	0	0	0	0	0	0	0	0	0	0	0	0	0	0	0	0	0	0	0	0	0	0	0	0	0	0	0	0	0	0	0	0	0	0	0	0
852	1	10764	107630000	107640000	0	0	0	1	0	0	0	0	0	0	0	0	0	5.21118e-06	0	0	0	0	0	0	0	0	0	0	0	0	0	0	0	1.35575e-06	1.35575e-06	0	0	0	0	0	0	0	0	0	0	0	0	0	0
853	1	10765	107640000	107650000	0	0	0	2	0	0	0	0	0	0	0	0	0	1.04224e-05	0	0	0	0	0	0	0	0	0	0	0	0	0	0	0	2.7115e-06	2.7115e-06	0	0	0	0	0	0	0	0	0	0	0	0	0	0
854	1	10766	107650000	107660000	0	0	0	1	0	0	0	0	0	0	0	0	0	5.21118e-06	0	0	0	0	0	0	0	0	0	0	0	0	0	0	0	1.35575e-06	1.35575e-06	0	0	0	0	0	0	0	0	0	0	0	0	0	0
855	1	10767	107660000	107670000	0	0	0	1	0	0	0	0	0	0	0	0	0	5.21118e-06	0	0	0	0	0	0	0	0	0	0	0	0	0	0	0	1.35575e-06	1.35575e-06	0	0	0	0	0	0	0	0	0	0	0	0	0	0
856	1	10768	107670000	107680000	0	0	0	3	0	0	0	0	0	0	0	0	0	1.56335e-05	0	0	0	0	0	0	0	0	0	0	0	0	0	0	0	4.06725e-06	4.06725e-06	0	0	0	0	0	0	0	0	0	0	0	0	0	0
857	1	10769	107680000	107690000	0	0	0	6	0	0	6	0	0	0	0	0	0	3.12671e-05	0	0	6.99896e-05	0	0	0	0	0	0	0	0	0	0	0	3.66995e-06	8.13449e-06	1.18044e-05	0	0	0	0	0	0	0	0	0	0	0	0	0	0
858	1	1077	10760000	10770000	0	0	0	3	1	0	0	0	0	0	0	0	0	1.56335e-05	4.48209e-05	0	0	0	0	0	0	0	0	0	5.43748e-06	0	0	0	0	4.06725e-06	9.50472e-06	0	0	0	0	0	0	0	0	0	0	0	0	0	0
859	1	10770	107690000	107700000	0	0	0	0	0	0	0	0	0	0	0	0	0	0	0	0	0	0	0	0	0	0	0	0	0	0	0	0	0	0	0	0	0	0	0	0	0	0	0	0	0	0	0	0	0
860	1	10771	107700000	107710000	0	0	0	0	0	0	0	0	0	0	0	0	0	0	0	0	0	0	0	0	0	0	0	0	0	0	0	0	0	0	0	0	0	0	0	0	0	0	0	0	0	0	0	0	0
861	1	10772	107710000	107720000	0	0	0	0	0	0	0	0	0	0	0	0	0	0	0	0	0	0	0	0	0	0	0	0	0	0	0	0	0	0	0	0	0	0	0	0	0	0	0	0	0	0	0	0	0
862	1	10773	107720000	107730000	0	0	0	0	0	0	0	0	0	0	0	0	0	0	0	0	0	0	0	0	0	0	0	0	0	0	0	0	0	0	0	0	0	0	0	0	0	0	0	0	0	0	0	0	0
863	1	10774	107730000	107740000	0	0	0	1	0	0	0	0	0	0	0	0	0	5.21118e-06	0	0	0	0	0	0	0	0	0	0	0	0	0	0	0	1.35575e-06	1.35575e-06	0	0	0	0	0	0	0	0	0	0	0	0	0	0
864	1	10775	107740000	107750000	0	0	0	0	0	0	0	0	0	0	0	0	0	0	0	0	0	0	0	0	0	0	0	0	0	0	0	0	0	0	0	0	0	0	0	0	0	0	0	0	0	0	0	0	0
865	1	10776	107750000	107760000	0	0	0	2	0	0	0	0	0	0	0	0	0	1.04224e-05	0	0	0	0	0	0	0	0	0	0	0	0	0	0	0	2.7115e-06	2.7115e-06	0	0	0	0	0	0	0	0	0	0	0	0	0	0
866	1	10777	107760000	107770000	0	0	0	3	0	0	0	0	0	0	0	0	0	1.56335e-05	0	0	0	0	0	0	0	0	0	0	0	0	0	0	0	4.06725e-06	4.06725e-06	0	0	0	0	0	0	0	0	0	0	0	0	0	0
867	1	10778	107770000	107780000	0	0	0	0	2	0	0	0	0	0	0	0	0	0	8.96419e-05	0	0	0	0	0	0	0	0	0	1.0875e-05	0	0	0	0	0	1.0875e-05	0	0	0	0	0	0	0	0	0	0	0	0	0	0
868	1	10779	107780000	107790000	0	0	0	0	0	0	0	0	0	0	0	0	0	0	0	0	0	0	0	0	0	0	0	0	0	0	0	0	0	0	0	0	0	0	0	0	0	0	0	0	0	0	0	0	0
869	1	1078	10770000	10780000	0	0	0	1	1	2	0	0	0	0	0	0	0	5.21118e-06	4.48209e-05	2.79357e-05	0	0	0	0	0	0	0	0	5.43748e-06	0	0	1.03578e-06	0	1.35575e-06	7.829e-06	0	0	0	0	0	0	0	0	0	0	0	0	0	0
870	1	10780	107790000	107800000	0	0	0	0	0	1	0	0	0	0	0	0	0	0	0	1.39678e-05	0	0	0	0	0	0	0	0	0	0	0	5.17889e-07	0	0	5.17889e-07	0	0	0	0	0	0	0	0	0	0	0	0	0	0
871	1	10781	107800000	107810000	0	0	0	0	0	0	0	0	0	0	0	0	0	0	0	0	0	0	0	0	0	0	0	0	0	0	0	0	0	0	0	0	0	0	0	0	0	0	0	0	0	0	0	0	0
872	1	10782	107810000	107820000	0	0	0	2	0	0	0	0	0	0	0	0	0	1.04224e-05	0	0	0	0	0	0	0	0	0	0	0	0	0	0	0	2.7115e-06	2.7115e-06	0	0	0	0	0	0	0	0	0	0	0	0	0	0
873	1	10783	107820000	107830000	0	0	0	0	0	4	0	0	0	0	0	0	0	0	0	5.58714e-05	0	0	0	0	0	0	0	0	0	0	0	2.07156e-06	0	0	2.07156e-06	0	0	0	0	0	0	0	0	0	0	0	0	0	0
874	1	10784	107830000	107840000	0	0	0	2	0	0	0	0	0	0	0	0	0	1.04224e-05	0	0	0	0	0	0	0	0	0	0	0	0	0	0	0	2.7115e-06	2.7115e-06	0	0	0	0	0	0	0	0	0	0	0	0	0	0
875	1	10785	107840000	107850000	0	0	0	0	1	6	0	0	0	0	0	0	0	0	4.48209e-05	8.38071e-05	0	0	0	0	0	0	0	0	5.43748e-06	0	0	3.10734e-06	0	0	8.54481e-06	0	0	0	0	0	0	0	0	0	0	0	0	0	0
876	1	10786	107850000	107860000	0	0	0	0	0	0	0	0	0	0	0	0	0	0	0	0	0	0	0	0	0	0	0	0	0	0	0	0	0	0	0	0	0	0	0	0	0	0	0	0	0	0	0	0	0
877	1	10787	107860000	107870000	0	0	0	0	0	1	0	0	1	0	0	0	0	0	0	1.39678e-05	0	0	1.82652e-05	0	0	0	0	0	0	0	6.57388e-07	5.17889e-07	0	0	1.17528e-06	0	0	0	0	0	0	0	0	0	0	0	0	0	0
878	1	10788	107870000	107880000	0	0	0	0	0	2	0	0	1	0	0	0	0	0	0	2.79357e-05	0	0	1.82652e-05	0	0	0	0	0	0	0	6.57388e-07	1.03578e-06	0	0	1.69317e-06	0	0	0	0	0	0	0	0	0	0	0	0	0	0
879	1	10789	107880000	107890000	0	0	0	1	0	0	0	0	0	0	0	0	0	5.21118e-06	0	0	0	0	0	0	0	0	0	0	0	0	0	0	0	1.35575e-06	1.35575e-06	0	0	0	0	0	0	0	0	0	0	0	0	0	0
880	1	1079	10780000	10790000	0	0	0	0	0	3	0	0	0	0	0	0	0	0	0	4.19035e-05	0	0	0	0	0	0	0	0	0	0	0	1.55367e-06	0	0	1.55367e-06	0	0	0	0	0	0	0	0	0	0	0	0	0	0
881	1	10790	107890000	107900000	0	0	0	2	0	0	0	0	0	0	0	0	0	1.04224e-05	0	0	0	0	0	0	0	0	0	0	0	0	0	0	0	2.7115e-06	2.7115e-06	0	0	0	0	0	0	0	0	0	0	0	0	0	0
882	1	10791	107900000	107910000	0	0	0	0	0	2	0	0	0	0	0	0	0	0	0	2.79357e-05	0	0	0	0	0	0	0	0	0	0	0	1.03578e-06	0	0	1.03578e-06	0	0	0	0	0	0	0	0	0	0	0	0	0	0
883	1	10792	107910000	107920000	0	0	0	0	0	0	0	0	0	0	0	0	0	0	0	0	0	0	0	0	0	0	0	0	0	0	0	0	0	0	0	0	0	0	0	0	0	0	0	0	0	0	0	0	0
884	1	10793	107920000	107930000	0	0	0	1	1	0	0	0	0	0	0	0	0	5.21118e-06	4.48209e-05	0	0	0	0	0	0	0	0	0	5.43748e-06	0	0	0	0	1.35575e-06	6.79323e-06	0	0	0	0	0	0	0	0	0	0	0	0	0	0
885	1	10794	107930000	107940000	0	0	0	2	0	0	0	0	0	0	0	0	0	1.04224e-05	0	0	0	0	0	0	0	0	0	0	0	0	0	0	0	2.7115e-06	2.7115e-06	0	0	0	0	0	0	0	0	0	0	0	0	0	0
886	1	10795	107940000	107950000	0	0	0	0	0	0	1	0	0	0	0	0	0	0	0	0	1.16649e-05	0	0	0	0	0	0	0	0	0	0	0	6.11658e-07	0	6.11658e-07	0	0	0	0	0	0	0	0	0	0	0	0	0	0
887	1	10796	107950000	107960000	0	0	0	2	0	0	2	0	0	0	0	0	0	1.04224e-05	0	0	2.33299e-05	0	0	0	0	0	0	0	0	0	0	0	1.22332e-06	2.7115e-06	3.93481e-06	0	0	0	0	0	0	0	0	0	0	0	0	0	0
888	1	10797	107960000	107970000	0	0	0	1	0	0	0	0	0	0	0	0	0	5.21118e-06	0	0	0	0	0	0	0	0	0	0	0	0	0	0	0	1.35575e-06	1.35575e-06	0	0	0	0	0	0	0	0	0	0	0	0	0	0
889	1	10798	107970000	107980000	0	0	0	4	0	0	0	0	0	0	0	0	0	2.08447e-05	0	0	0	0	0	0	0	0	0	0	0	0	0	0	0	5.42299e-06	5.42299e-06	0	0	0	0	0	0	0	0	0	0	0	0	0	0
890	1	10799	107980000	107990000	0	0	0	0	0	0	0	0	0	0	0	0	0	0	0	0	0	0	0	0	0	0	0	0	0	0	0	0	0	0	0	0	0	0	0	0	0	0	0	0	0	0	0	0	0
891	1	108	1070000	1080000	0	0	0	0	0	0	0	0	2	0	0	0	0	0	0	0	0	0	3.65303e-05	0	0	0	0	0	0	0	1.31478e-06	0	0	0	1.31478e-06	0	0	0	0	0	0	0	0	0	0	0	0	0	0
892	1	1080	10790000	10800000	0	0	0	0	0	0	0	0	1	0	0	0	0	0	0	0	0	0	1.82652e-05	0	0	0	0	0	0	0	6.57388e-07	0	0	0	6.57388e-07	0	0	0	0	0	0	0	0	0	0	0	0	0	0
893	1	10800	107990000	108000000	0	0	0	0	0	0	0	0	0	0	0	0	0	0	0	0	0	0	0	0	0	0	0	0	0	0	0	0	0	0	0	0	0	0	0	0	0	0	0	0	0	0	0	0	0
894	1	10801	108000000	108010000	0	0	0	0	0	0	0	0	0	0	0	0	0	0	0	0	0	0	0	0	0	0	0	0	0	0	0	0	0	0	0	0	0	0	0	0	0	0	0	0	0	0	0	0	0
895	1	10802	108010000	108020000	0	0	0	0	0	0	0	0	0	0	0	0	0	0	0	0	0	0	0	0	0	0	0	0	0	0	0	0	0	0	0	0	0	0	0	0	0	0	0	0	0	0	0	0	0
896	1	10803	108020000	108030000	0	0	0	0	1	0	0	0	0	0	0	0	0	0	4.48209e-05	0	0	0	0	0	0	0	0	0	5.43748e-06	0	0	0	0	0	5.43748e-06	0	0	0	0	0	0	0	0	0	0	0	0	0	0
897	1	10804	108030000	108040000	0	0	0	1	0	0	1	0	0	0	0	0	0	5.21118e-06	0	0	1.16649e-05	0	0	0	0	0	0	0	0	0	0	0	6.11658e-07	1.35575e-06	1.96741e-06	0	0	0	0	0	0	0	0	0	0	0	0	0	0
898	1	10805	108040000	108050000	0	0	0	3	0	0	0	0	1	0	0	0	0	1.56335e-05	0	0	0	0	1.82652e-05	0	0	0	0	0	0	0	6.57388e-07	0	0	4.06725e-06	4.72463e-06	0	0	0	0	0	0	0	0	0	0	0	0	0	0
899	1	10806	108050000	108060000	0	0	0	2	0	0	0	0	0	0	0	0	0	1.04224e-05	0	0	0	0	0	0	0	0	0	0	0	0	0	0	0	2.7115e-06	2.7115e-06	0	0	0	0	0	0	0	0	0	0	0	0	0	0
900	1	10807	108060000	108070000	0	0	0	0	0	0	0	0	1	0	0	0	0	0	0	0	0	0	1.82652e-05	0	0	0	0	0	0	0	6.57388e-07	0	0	0	6.57388e-07	0	0	0	0	0	0	0	0	0	0	0	0	0	0
901	1	10808	108070000	108080000	0	0	0	0	0	0	0	0	0	0	0	0	0	0	0	0	0	0	0	0	0	0	0	0	0	0	0	0	0	0	0	0	0	0	0	0	0	0	0	0	0	0	0	0	0
902	1	10809	108080000	108090000	0	0	0	0	0	0	0	0	0	0	0	0	0	0	0	0	0	0	0	0	0	0	0	0	0	0	0	0	0	0	0	0	0	0	0	0	0	0	0	0	0	0	0	0	0
903	1	1081	10800000	10810000	0	0	0	0	0	1	0	0	1	0	0	0	0	0	0	1.39678e-05	0	0	1.82652e-05	0	0	0	0	0	0	0	6.57388e-07	5.17889e-07	0	0	1.17528e-06	0	0	0	0	0	0	0	0	0	0	0	0	0	0
904	1	10810	108090000	108100000	0	0	0	2	0	0	0	0	0	0	0	0	0	1.04224e-05	0	0	0	0	0	0	0	0	0	0	0	0	0	0	0	2.7115e-06	2.7115e-06	0	0	0	0	0	0	0	0	0	0	0	0	0	0
905	1	10811	108100000	108110000	0	0	0	0	0	0	0	0	0	0	0	0	0	0	0	0	0	0	0	0	0	0	0	0	0	0	0	0	0	0	0	0	0	0	0	0	0	0	0	0	0	0	0	0	0
906	1	10812	108110000	108120000	0	0	0	1	0	0	2	0	0	0	0	0	0	5.21118e-06	0	0	2.33299e-05	0	0	0	0	0	0	0	0	0	0	0	1.22332e-06	1.35575e-06	2.57906e-06	0	0	0	0	0	0	0	0	0	0	0	0	0	0
907	1	10813	108120000	108130000	0	0	0	0	0	1	0	0	0	0	0	0	0	0	0	1.39678e-05	0	0	0	0	0	0	0	0	0	0	0	5.17889e-07	0	0	5.17889e-07	0	0	0	0	0	0	0	0	0	0	0	0	0	0
908	1	10814	108130000	108140000	0	0	0	0	1	0	0	0	0	0	0	0	0	0	4.48209e-05	0	0	0	0	0	0	0	0	0	5.43748e-06	0	0	0	0	0	5.43748e-06	0	0	0	0	0	0	0	0	0	0	0	0	0	0
909	1	10815	108140000	108150000	0	0	0	1	0	1	0	0	1	0	0	0	0	5.21118e-06	0	1.39678e-05	0	0	1.82652e-05	0	0	0	0	0	0	0	6.57388e-07	5.17889e-07	0	1.35575e-06	2.53103e-06	0	0	0	0	0	0	0	0	0	0	0	0	0	0
910	1	10816	108150000	108160000	0	0	0	1	0	0	0	0	0	0	0	0	0	5.21118e-06	0	0	0	0	0	0	0	0	0	0	0	0	0	0	0	1.35575e-06	1.35575e-06	0	0	0	0	0	0	0	0	0	0	0	0	0	0
911	1	10817	108160000	108170000	0	0	0	1	0	0	0	0	0	0	0	0	0	5.21118e-06	0	0	0	0	0	0	0	0	0	0	0	0	0	0	0	1.35575e-06	1.35575e-06	0	0	0	0	0	0	0	0	0	0	0	0	0	0
912	1	10818	108170000	108180000	0	0	0	0	0	1	0	0	0	0	0	0	0	0	0	1.39678e-05	0	0	0	0	0	0	0	0	0	0	0	5.17889e-07	0	0	5.17889e-07	0	0	0	0	0	0	0	0	0	0	0	0	0	0
913	1	10819	108180000	108190000	0	0	0	0	0	1	0	0	1	0	0	0	0	0	0	1.39678e-05	0	0	1.82652e-05	0	0	0	0	0	0	0	6.57388e-07	5.17889e-07	0	0	1.17528e-06	0	0	0	0	0	0	0	0	0	0	0	0	0	0
914	1	1082	10810000	10820000	0	0	0	2	0	0	0	0	0	0	0	0	0	1.04224e-05	0	0	0	0	0	0	0	0	0	0	0	0	0	0	0	2.7115e-06	2.7115e-06	0	0	0	0	0	0	0	0	0	0	0	0	0	0
915	1	10820	108190000	108200000	0	0	0	1	0	0	0	0	1	0	0	0	0	5.21118e-06	0	0	0	0	1.82652e-05	0	0	0	0	0	0	0	6.57388e-07	0	0	1.35575e-06	2.01314e-06	0	0	0	0	0	0	0	0	0	0	0	0	0	0
916	1	10821	108200000	108210000	0	0	0	3	0	0	0	0	0	0	0	0	0	1.56335e-05	0	0	0	0	0	0	0	0	0	0	0	0	0	0	0	4.06725e-06	4.06725e-06	0	0	0	0	0	0	0	0	0	0	0	0	0	0
917	1	10822	108210000	108220000	0	0	0	0	0	0	0	0	0	0	0	0	0	0	0	0	0	0	0	0	0	0	0	0	0	0	0	0	0	0	0	0	0	0	0	0	0	0	0	0	0	0	0	0	0
918	1	10823	108220000	108230000	0	0	0	1	0	0	0	0	0	0	0	0	0	5.21118e-06	0	0	0	0	0	0	0	0	0	0	0	0	0	0	0	1.35575e-06	1.35575e-06	0	0	0	0	0	0	0	0	0	0	0	0	0	0
919	1	10824	108230000	108240000	0	0	0	0	0	0	0	0	2	0	0	0	0	0	0	0	0	0	3.65303e-05	0	0	0	0	0	0	0	1.31478e-06	0	0	0	1.31478e-06	0	0	0	0	0	0	0	0	0	0	0	0	0	0
920	1	10825	108240000	108250000	0	0	0	0	0	0	0	0	0	0	0	0	0	0	0	0	0	0	0	0	0	0	0	0	0	0	0	0	0	0	0	0	0	0	0	0	0	0	0	0	0	0	0	0	0
921	1	10826	108250000	108260000	0	0	0	0	0	1	0	0	0	0	0	0	0	0	0	1.39678e-05	0	0	0	0	0	0	0	0	0	0	0	5.17889e-07	0	0	5.17889e-07	0	0	0	0	0	0	0	0	0	0	0	0	0	0
922	1	10827	108260000	108270000	0	0	0	0	0	0	0	0	0	0	0	0	0	0	0	0	0	0	0	0	0	0	0	0	0	0	0	0	0	0	0	0	0	0	0	0	0	0	0	0	0	0	0	0	0
923	1	10828	108270000	108280000	0	0	0	0	0	0	0	0	0	0	0	0	0	0	0	0	0	0	0	0	0	0	0	0	0	0	0	0	0	0	0	0	0	0	0	0	0	0	0	0	0	0	0	0	0
924	1	10829	108280000	108290000	0	0	0	0	0	0	0	0	0	0	0	0	0	0	0	0	0	0	0	0	0	0	0	0	0	0	0	0	0	0	0	0	0	0	0	0	0	0	0	0	0	0	0	0	0
925	1	1083	10820000	10830000	0	0	0	1	0	0	0	0	0	0	0	0	0	5.21118e-06	0	0	0	0	0	0	0	0	0	0	0	0	0	0	0	1.35575e-06	1.35575e-06	0	0	0	0	0	0	0	0	0	0	0	0	0	0
926	1	10830	108290000	108300000	0	0	0	0	0	0	0	0	3	0	0	0	0	0	0	0	0	0	5.47955e-05	0	0	0	0	0	0	0	1.97216e-06	0	0	0	1.97216e-06	0	0	0	0	0	0	0	0	0	0	0	0	0	0
927	1	10831	108300000	108310000	0	0	0	0	0	0	0	0	0	0	0	0	0	0	0	0	0	0	0	0	0	0	0	0	0	0	0	0	0	0	0	0	0	0	0	0	0	0	0	0	0	0	0	0	0
928	1	10832	108310000	108320000	0	0	0	0	0	0	0	0	0	0	0	0	0	0	0	0	0	0	0	0	0	0	0	0	0	0	0	0	0	0	0	0	0	0	0	0	0	0	0	0	0	0	0	0	0
929	1	10833	108320000	108330000	0	0	0	1	0	1	0	0	0	0	0	0	0	5.21118e-06	0	1.39678e-05	0	0	0	0	0	0	0	0	0	0	0	5.17889e-07	0	1.35575e-06	1.87364e-06	0	0	0	0	0	0	0	0	0	0	0	0	0	0
930	1	10834	108330000	108340000	0	0	0	0	0	2	0	0	0	0	0	0	0	0	0	2.79357e-05	0	0	0	0	0	0	0	0	0	0	0	1.03578e-06	0	0	1.03578e-06	0	0	0	0	0	0	0	0	0	0	0	0	0	0
931	1	10835	108340000	108350000	0	0	0	2	0	0	0	0	0	0	0	0	0	1.04224e-05	0	0	0	0	0	0	0	0	0	0	0	0	0	0	0	2.7115e-06	2.7115e-06	0	0	0	0	0	0	0	0	0	0	0	0	0	0
932	1	10836	108350000	108360000	0	0	0	0	0	0	0	0	0	0	0	0	0	0	0	0	0	0	0	0	0	0	0	0	0	0	0	0	0	0	0	0	0	0	0	0	0	0	0	0	0	0	0	0	0
933	1	10837	108360000	108370000	0	0	0	2	0	0	0	0	1	0	0	0	0	1.04224e-05	0	0	0	0	1.82652e-05	0	0	0	0	0	0	0	6.57388e-07	0	0	2.7115e-06	3.36888e-06	0	0	0	0	0	0	0	0	0	0	0	0	0	0
934	1	10838	108370000	108380000	0	0	0	0	0	1	0	0	0	0	0	0	0	0	0	1.39678e-05	0	0	0	0	0	0	0	0	0	0	0	5.17889e-07	0	0	5.17889e-07	0	0	0	0	0	0	0	0	0	0	0	0	0	0
935	1	10839	108380000	108390000	0	0	0	0	0	0	0	0	1	0	0	0	0	0	0	0	0	0	1.82652e-05	0	0	0	0	0	0	0	6.57388e-07	0	0	0	6.57388e-07	0	0	0	0	0	0	0	0	0	0	0	0	0	0
936	1	1084	10830000	10840000	0	0	0	1	0	0	0	0	0	0	0	0	0	5.21118e-06	0	0	0	0	0	0	0	0	0	0	0	0	0	0	0	1.35575e-06	1.35575e-06	0	0	0	0	0	0	0	0	0	0	0	0	0	0
937	1	10840	108390000	108400000	0	0	0	0	0	0	0	0	0	0	0	0	0	0	0	0	0	0	0	0	0	0	0	0	0	0	0	0	0	0	0	0	0	0	0	0	0	0	0	0	0	0	0	0	0
938	1	10841	108400000	108410000	0	0	0	0	0	0	2	0	0	0	0	0	0	0	0	0	2.33299e-05	0	0	0	0	0	0	0	0	0	0	0	1.22332e-06	0	1.22332e-06	0	0	0	0	0	0	0	0	0	0	0	0	0	0
939	1	10842	108410000	108420000	0	0	0	0	0	0	0	1	0	0	0	0	0	0	0	0	0	2.0859e-05	0	0	0	0	0	0	0	3.59838e-06	0	0	0	0	3.59838e-06	0	0	0	0	0	0	0	0	0	0	0	0	0	0
940	1	10843	108420000	108430000	0	0	0	0	0	0	0	1	0	0	0	0	0	0	0	0	0	2.0859e-05	0	0	0	0	0	0	0	3.59838e-06	0	0	0	0	3.59838e-06	0	0	0	0	0	0	0	0	0	0	0	0	0	0
941	1	10844	108430000	108440000	0	0	0	0	0	0	0	0	0	0	0	0	0	0	0	0	0	0	0	0	0	0	0	0	0	0	0	0	0	0	0	0	0	0	0	0	0	0	0	0	0	0	0	0	0
942	1	10845	108440000	108450000	0	0	0	0	0	0	0	0	0	0	0	0	0	0	0	0	0	0	0	0	0	0	0	0	0	0	0	0	0	0	0	0	0	0	0	0	0	0	0	0	0	0	0	0	0
943	1	10846	108450000	108460000	0	0	0	1	0	0	1	0	0	0	0	0	0	5.21118e-06	0	0	1.16649e-05	0	0	0	0	0	0	0	0	0	0	0	6.11658e-07	1.35575e-06	1.96741e-06	0	0	0	0	0	0	0	0	0	0	0	0	0	0
944	1	10847	108460000	108470000	0	0	0	1	0	0	0	0	0	0	0	0	0	5.21118e-06	0	0	0	0	0	0	0	0	0	0	0	0	0	0	0	1.35575e-06	1.35575e-06	0	0	0	0	0	0	0	0	0	0	0	0	0	0
945	1	10848	108470000	108480000	0	0	0	0	0	0	0	0	0	0	0	0	0	0	0	0	0	0	0	0	0	0	0	0	0	0	0	0	0	0	0	0	0	0	0	0	0	0	0	0	0	0	0	0	0
946	1	10849	108480000	108490000	0	0	0	0	0	0	0	0	0	0	0	0	0	0	0	0	0	0	0	0	0	0	0	0	0	0	0	0	0	0	0	0	0	0	0	0	0	0	0	0	0	0	0	0	0
947	1	1085	10840000	10850000	0	0	0	2	0	0	0	0	0	0	0	0	0	1.04224e-05	0	0	0	0	0	0	0	0	0	0	0	0	0	0	0	2.7115e-06	2.7115e-06	0	0	0	0	0	0	0	0	0	0	0	0	0	0
948	1	10850	108490000	108500000	0	0	0	0	0	0	0	0	0	0	0	0	0	0	0	0	0	0	0	0	0	0	0	0	0	0	0	0	0	0	0	0	0	0	0	0	0	0	0	0	0	0	0	0	0
949	1	10851	108500000	108510000	0	0	0	0	0	0	0	0	0	0	0	0	0	0	0	0	0	0	0	0	0	0	0	0	0	0	0	0	0	0	0	0	0	0	0	0	0	0	0	0	0	0	0	0	0
950	1	10852	108510000	108520000	0	0	0	0	0	0	0	0	0	0	0	0	0	0	0	0	0	0	0	0	0	0	0	0	0	0	0	0	0	0	0	0	0	0	0	0	0	0	0	0	0	0	0	0	0
951	1	10853	108520000	108530000	0	0	0	0	0	0	3	0	0	0	0	0	0	0	0	0	3.49948e-05	0	0	0	0	0	0	0	0	0	0	0	1.83497e-06	0	1.83497e-06	0	0	0	0	0	0	0	0	0	0	0	0	0	0
952	1	10854	108530000	108540000	0	0	0	0	0	0	0	0	0	0	0	0	0	0	0	0	0	0	0	0	0	0	0	0	0	0	0	0	0	0	0	0	0	0	0	0	0	0	0	0	0	0	0	0	0
953	1	10855	108540000	108550000	0	0	0	1	0	1	0	0	0	0	0	0	0	5.21118e-06	0	1.39678e-05	0	0	0	0	0	0	0	0	0	0	0	5.17889e-07	0	1.35575e-06	1.87364e-06	0	0	0	0	0	0	0	0	0	0	0	0	0	0
954	1	10856	108550000	108560000	0	0	0	0	0	0	0	0	0	0	0	0	0	0	0	0	0	0	0	0	0	0	0	0	0	0	0	0	0	0	0	0	0	0	0	0	0	0	0	0	0	0	0	0	0
955	1	10857	108560000	108570000	0	0	0	1	0	0	0	0	0	0	0	0	0	5.21118e-06	0	0	0	0	0	0	0	0	0	0	0	0	0	0	0	1.35575e-06	1.35575e-06	0	0	0	0	0	0	0	0	0	0	0	0	0	0
956	1	10858	108570000	108580000	0	0	0	0	0	0	0	0	0	0	0	0	0	0	0	0	0	0	0	0	0	0	0	0	0	0	0	0	0	0	0	0	0	0	0	0	0	0	0	0	0	0	0	0	0
957	1	10859	108580000	108590000	0	0	0	1	0	1	1	0	0	0	0	0	0	5.21118e-06	0	1.39678e-05	1.16649e-05	0	0	0	0	0	0	0	0	0	0	5.17889e-07	6.11658e-07	1.35575e-06	2.4853e-06	0	0	0	0	0	0	0	0	0	0	0	0	0	0
958	1	1086	10850000	10860000	0	0	0	1	0	0	0	0	0	0	0	0	0	5.21118e-06	0	0	0	0	0	0	0	0	0	0	0	0	0	0	0	1.35575e-06	1.35575e-06	0	0	0	0	0	0	0	0	0	0	0	0	0	0
959	1	10860	108590000	108600000	0	0	0	3	0	0	0	0	0	0	0	0	0	1.56335e-05	0	0	0	0	0	0	0	0	0	0	0	0	0	0	0	4.06725e-06	4.06725e-06	0	0	0	0	0	0	0	0	0	0	0	0	0	0
960	1	10861	108600000	108610000	0	0	0	0	0	0	0	0	0	0	0	0	0	0	0	0	0	0	0	0	0	0	0	0	0	0	0	0	0	0	0	0	0	0	0	0	0	0	0	0	0	0	0	0	0
961	1	10862	108610000	108620000	0	0	0	0	0	0	0	0	0	0	0	0	0	0	0	0	0	0	0	0	0	0	0	0	0	0	0	0	0	0	0	0	0	0	0	0	0	0	0	0	0	0	0	0	0
962	1	10863	108620000	108630000	0	0	0	0	0	0	0	0	0	0	0	0	0	0	0	0	0	0	0	0	0	0	0	0	0	0	0	0	0	0	0	0	0	0	0	0	0	0	0	0	0	0	0	0	0
963	1	10864	108630000	108640000	0	0	0	0	0	0	0	0	0	0	0	0	0	0	0	0	0	0	0	0	0	0	0	0	0	0	0	0	0	0	0	0	0	0	0	0	0	0	0	0	0	0	0	0	0
964	1	10865	108640000	108650000	0	0	0	0	0	0	4	0	0	0	0	0	0	0	0	0	4.66597e-05	0	0	0	0	0	0	0	0	0	0	0	2.44663e-06	0	2.44663e-06	0	0	0	0	0	0	0	0	0	0	0	0	0	0
965	1	10866	108650000	108660000	0	0	0	0	0	0	0	0	0	0	0	0	0	0	0	0	0	0	0	0	0	0	0	0	0	0	0	0	0	0	0	0	0	0	0	0	0	0	0	0	0	0	0	0	0
966	1	10867	108660000	108670000	0	0	0	1	0	0	0	0	0	0	0	0	0	5.21118e-06	0	0	0	0	0	0	0	0	0	0	0	0	0	0	0	1.35575e-06	1.35575e-06	0	0	0	0	0	0	0	0	0	0	0	0	0	0
967	1	10868	108670000	108680000	0	0	0	1	0	0	0	0	1	0	0	0	0	5.21118e-06	0	0	0	0	1.82652e-05	0	0	0	0	0	0	0	6.57388e-07	0	0	1.35575e-06	2.01314e-06	0	0	0	0	0	0	0	0	0	0	0	0	0	0
968	1	10869	108680000	108690000	0	0	0	0	0	0	0	0	0	0	0	0	0	0	0	0	0	0	0	0	0	0	0	0	0	0	0	0	0	0	0	0	0	0	0	0	0	0	0	0	0	0	0	0	0
969	1	1087	10860000	10870000	0	0	0	0	0	0	0	0	0	0	0	0	0	0	0	0	0	0	0	0	0	0	0	0	0	0	0	0	0	0	0	0	0	0	0	0	0	0	0	0	0	0	0	0	0
970	1	10870	108690000	108700000	0	0	0	1	0	0	1	0	0	0	0	0	0	5.21118e-06	0	0	1.16649e-05	0	0	0	0	0	0	0	0	0	0	0	6.11658e-07	1.35575e-06	1.96741e-06	0	0	0	0	0	0	0	0	0	0	0	0	0	0
971	1	10871	108700000	108710000	0	0	0	2	0	1	0	1	0	0	0	0	0	1.04224e-05	0	1.39678e-05	0	2.0859e-05	0	0	0	0	0	0	0	3.59838e-06	0	5.17889e-07	0	2.7115e-06	6.82777e-06	0	0	0	0	0	0	0	0	0	0	0	0	0	0
972	1	10872	108710000	108720000	0	0	0	0	0	0	0	0	0	0	0	0	0	0	0	0	0	0	0	0	0	0	0	0	0	0	0	0	0	0	0	0	0	0	0	0	0	0	0	0	0	0	0	0	0
973	1	10873	108720000	108730000	0	0	0	0	0	0	0	0	0	0	0	0	0	0	0	0	0	0	0	0	0	0	0	0	0	0	0	0	0	0	0	0	0	0	0	0	0	0	0	0	0	0	0	0	0
974	1	10874	108730000	108740000	0	0	0	0	0	0	0	0	0	0	0	0	0	0	0	0	0	0	0	0	0	0	0	0	0	0	0	0	0	0	0	0	0	0	0	0	0	0	0	0	0	0	0	0	0
975	1	10875	108740000	108750000	0	0	0	3	0	0	0	0	0	0	0	0	0	1.56335e-05	0	0	0	0	0	0	0	0	0	0	0	0	0	0	0	4.06725e-06	4.06725e-06	0	0	0	0	0	0	0	0	0	0	0	0	0	0
976	1	10876	108750000	108760000	0	0	0	1	0	0	0	0	0	0	0	0	0	5.21118e-06	0	0	0	0	0	0	0	0	0	0	0	0	0	0	0	1.35575e-06	1.35575e-06	0	0	0	0	0	0	0	0	0	0	0	0	0	0
977	1	10877	108760000	108770000	0	0	0	0	0	0	0	0	0	0	0	0	0	0	0	0	0	0	0	0	0	0	0	0	0	0	0	0	0	0	0	0	0	0	0	0	0	0	0	0	0	0	0	0	0
978	1	10878	108770000	108780000	0	0	0	0	0	0	0	0	0	0	0	0	0	0	0	0	0	0	0	0	0	0	0	0	0	0	0	0	0	0	0	0	0	0	0	0	0	0	0	0	0	0	0	0	0
979	1	10879	108780000	108790000	0	0	0	0	0	0	0	0	0	0	0	0	0	0	0	0	0	0	0	0	0	0	0	0	0	0	0	0	0	0	0	0	0	0	0	0	0	0	0	0	0	0	0	0	0
980	1	1088	10870000	10880000	0	0	0	1	0	0	2	0	0	0	0	0	0	5.21118e-06	0	0	2.33299e-05	0	0	0	0	0	0	0	0	0	0	0	1.22332e-06	1.35575e-06	2.57906e-06	0	0	0	0	0	0	0	0	0	0	0	0	0	0
981	1	10880	108790000	108800000	0	0	0	0	0	0	0	0	0	0	0	0	0	0	0	0	0	0	0	0	0	0	0	0	0	0	0	0	0	0	0	0	0	0	0	0	0	0	0	0	0	0	0	0	0
982	1	10881	108800000	108810000	0	0	0	0	0	0	0	0	0	0	0	0	0	0	0	0	0	0	0	0	0	0	0	0	0	0	0	0	0	0	0	0	0	0	0	0	0	0	0	0	0	0	0	0	0
983	1	10882	108810000	108820000	0	0	0	0	0	0	0	0	0	0	0	0	0	0	0	0	0	0	0	0	0	0	0	0	0	0	0	0	0	0	0	0	0	0	0	0	0	0	0	0	0	0	0	0	0
984	1	10883	108820000	108830000	0	0	0	0	0	0	0	0	0	0	0	0	0	0	0	0	0	0	0	0	0	0	0	0	0	0	0	0	0	0	0	0	0	0	0	0	0	0	0	0	0	0	0	0	0
985	1	10884	108830000	108840000	0	0	0	0	0	0	0	0	0	0	0	0	0	0	0	0	0	0	0	0	0	0	0	0	0	0	0	0	0	0	0	0	0	0	0	0	0	0	0	0	0	0	0	0	0
986	1	10885	108840000	108850000	0	0	0	0	0	0	0	0	0	0	0	0	0	0	0	0	0	0	0	0	0	0	0	0	0	0	0	0	0	0	0	0	0	0	0	0	0	0	0	0	0	0	0	0	0
987	1	10886	108850000	108860000	0	0	0	1	0	0	0	0	0	0	0	0	0	5.21118e-06	0	0	0	0	0	0	0	0	0	0	0	0	0	0	0	1.35575e-06	1.35575e-06	0	0	0	0	0	0	0	0	0	0	0	0	0	0
988	1	10887	108860000	108870000	0	0	0	0	1	0	0	0	0	0	0	0	0	0	4.48209e-05	0	0	0	0	0	0	0	0	0	5.43748e-06	0	0	0	0	0	5.43748e-06	0	0	0	0	0	0	0	0	0	0	0	0	0	0
989	1	10888	108870000	108880000	0	0	0	1	0	0	0	0	0	0	0	0	0	5.21118e-06	0	0	0	0	0	0	0	0	0	0	0	0	0	0	0	1.35575e-06	1.35575e-06	0	0	0	0	0	0	0	0	0	0	0	0	0	0
990	1	10889	108880000	108890000	0	0	0	0	0	0	1	0	0	0	0	0	0	0	0	0	1.16649e-05	0	0	0	0	0	0	0	0	0	0	0	6.11658e-07	0	6.11658e-07	0	0	0	0	0	0	0	0	0	0	0	0	0	0
991	1	1089	10880000	10890000	0	0	0	0	0	2	2	0	0	0	0	0	0	0	0	2.79357e-05	2.33299e-05	0	0	0	0	0	0	0	0	0	0	1.03578e-06	1.22332e-06	0	2.2591e-06	0	0	0	0	0	0	0	0	0	0	0	0	0	0
992	1	10890	108890000	108900000	0	0	0	1	0	0	0	0	0	0	0	0	0	5.21118e-06	0	0	0	0	0	0	0	0	0	0	0	0	0	0	0	1.35575e-06	1.35575e-06	0	0	0	0	0	0	0	0	0	0	0	0	0	0
993	1	10891	108900000	108910000	0	0	0	1	0	0	0	0	0	0	0	0	0	5.21118e-06	0	0	0	0	0	0	0	0	0	0	0	0	0	0	0	1.35575e-06	1.35575e-06	0	0	0	0	0	0	0	0	0	0	0	0	0	0
994	1	10892	108910000	108920000	0	0	0	0	0	0	0	0	0	0	0	0	0	0	0	0	0	0	0	0	0	0	0	0	0	0	0	0	0	0	0	0	0	0	0	0	0	0	0	0	0	0	0	0	0
995	1	10893	108920000	108930000	0	0	0	0	0	0	0	0	0	0	0	0	0	0	0	0	0	0	0	0	0	0	0	0	0	0	0	0	0	0	0	0	0	0	0	0	0	0	0	0	0	0	0	0	0
996	1	10894	108930000	108940000	0	0	0	0	0	0	0	0	0	0	0	0	0	0	0	0	0	0	0	0	0	0	0	0	0	0	0	0	0	0	0	0	0	0	0	0	0	0	0	0	0	0	0	0	0
997	1	10895	108940000	108950000	0	0	0	0	0	0	0	0	0	0	0	0	0	0	0	0	0	0	0	0	0	0	0	0	0	0	0	0	0	0	0	0	0	0	0	0	0	0	0	0	0	0	0	0	0
998	1	10896	108950000	108960000	0	0	0	0	0	0	0	0	0	0	0	0	0	0	0	0	0	0	0	0	0	0	0	0	0	0	0	0	0	0	0	0	0	0	0	0	0	0	0	0	0	0	0	0	0
999	1	10897	108960000	108970000	0	0	0	0	0	0	0	0	0	0	0	0	0	0	0	0	0	0	0	0	0	0	0	0	0	0	0	0	0	0	0	0	0	0	0	0	0	0	0	0	0	0	0	0	0
1000	1	10898	108970000	108980000	0	0	0	0	0	0	0	0	0	0	0	0	0	0	0	0	0	0	0	0	0	0	0	0	0	0	0	0	0	0	0	0	0	0	0	0	0	0	0	0	0	0	0	0	0
1001	1	10899	108980000	108990000	0	0	0	0	0	0	0	0	0	0	0	0	0	0	0	0	0	0	0	0	0	0	0	0	0	0	0	0	0	0	0	0	0	0	0	0	0	0	0	0	0	0	0	0	0
1002	1	109	1080000	1090000	0	0	0	0	0	0	0	0	1	0	0	0	0	0	0	0	0	0	1.82652e-05	0	0	0	0	0	0	0	6.57388e-07	0	0	0	6.57388e-07	0	0	0	0	0	0	0	0	0	0	0	0	0	0
1003	1	1090	10890000	10900000	0	0	0	1	0	0	0	0	0	0	0	0	0	5.21118e-06	0	0	0	0	0	0	0	0	0	0	0	0	0	0	0	1.35575e-06	1.35575e-06	0	0	0	0	0	0	0	0	0	0	0	0	0	0
1004	1	10900	108990000	109000000	0	0	0	0	0	0	0	0	0	0	0	0	0	0	0	0	0	0	0	0	0	0	0	0	0	0	0	0	0	0	0	0	0	0	0	0	0	0	0	0	0	0	0	0	0
1005	1	10901	109000000	109010000	0	0	0	0	0	0	0	0	0	0	0	0	0	0	0	0	0	0	0	0	0	0	0	0	0	0	0	0	0	0	0	0	0	0	0	0	0	0	0	0	0	0	0	0	0
1006	1	10902	109010000	109020000	0	0	0	0	0	0	0	1	0	0	0	0	0	0	0	0	0	2.0859e-05	0	0	0	0	0	0	0	3.59838e-06	0	0	0	0	3.59838e-06	0	0	0	0	0	0	0	0	0	0	0	0	0	0
1007	1	10903	109020000	109030000	0	0	0	0	0	0	0	0	0	0	0	0	0	0	0	0	0	0	0	0	0	0	0	0	0	0	0	0	0	0	0	0	0	0	0	0	0	0	0	0	0	0	0	0	0
1008	1	10904	109030000	109040000	0	0	0	0	0	0	0	0	0	0	0	0	0	0	0	0	0	0	0	0	0	0	0	0	0	0	0	0	0	0	0	0	0	0	0	0	0	0	0	0	0	0	0	0	0
1009	1	10905	109040000	109050000	0	0	0	0	0	1	0	0	0	0	0	0	0	0	0	1.39678e-05	0	0	0	0	0	0	0	0	0	0	0	5.17889e-07	0	0	5.17889e-07	0	0	0	0	0	0	0	0	0	0	0	0	0	0
1010	1	10906	109050000	109060000	0	0	0	2	0	0	0	0	0	0	0	0	0	1.04224e-05	0	0	0	0	0	0	0	0	0	0	0	0	0	0	0	2.7115e-06	2.7115e-06	0	0	0	0	0	0	0	0	0	0	0	0	0	0
1011	1	10907	109060000	109070000	0	0	0	0	0	3	0	0	0	0	0	0	0	0	0	4.19035e-05	0	0	0	0	0	0	0	0	0	0	0	1.55367e-06	0	0	1.55367e-06	0	0	0	0	0	0	0	0	0	0	0	0	0	0
1012	1	10908	109070000	109080000	0	0	0	0	0	1	0	0	0	0	0	0	0	0	0	1.39678e-05	0	0	0	0	0	0	0	0	0	0	0	5.17889e-07	0	0	5.17889e-07	0	0	0	0	0	0	0	0	0	0	0	0	0	0
1013	1	10909	109080000	109090000	0	0	0	0	0	2	0	0	0	0	0	0	0	0	0	2.79357e-05	0	0	0	0	0	0	0	0	0	0	0	1.03578e-06	0	0	1.03578e-06	0	0	0	0	0	0	0	0	0	0	0	0	0	0
1014	1	1091	10900000	10910000	0	0	0	0	0	0	0	0	0	0	0	0	0	0	0	0	0	0	0	0	0	0	0	0	0	0	0	0	0	0	0	0	0	0	0	0	0	0	0	0	0	0	0	0	0
1015	1	10910	109090000	109100000	0	0	0	0	0	0	0	0	0	0	0	0	0	0	0	0	0	0	0	0	0	0	0	0	0	0	0	0	0	0	0	0	0	0	0	0	0	0	0	0	0	0	0	0	0
1016	1	10911	109100000	109110000	0	0	0	1	0	0	0	0	0	0	0	0	0	5.21118e-06	0	0	0	0	0	0	0	0	0	0	0	0	0	0	0	1.35575e-06	1.35575e-06	0	0	0	0	0	0	0	0	0	0	0	0	0	0
1017	1	10912	109110000	109120000	0	0	0	3	0	0	2	0	0	0	0	0	0	1.56335e-05	0	0	2.33299e-05	0	0	0	0	0	0	0	0	0	0	0	1.22332e-06	4.06725e-06	5.29056e-06	0	0	0	0	0	0	0	0	0	0	0	0	0	0
1018	1	10913	109120000	109130000	0	0	0	1	0	2	0	0	0	0	0	0	0	5.21118e-06	0	2.79357e-05	0	0	0	0	0	0	0	0	0	0	0	1.03578e-06	0	1.35575e-06	2.39153e-06	0	0	0	0	0	0	0	0	0	0	0	0	0	0
1019	1	10914	109130000	109140000	0	0	0	0	0	0	0	0	0	0	0	0	0	0	0	0	0	0	0	0	0	0	0	0	0	0	0	0	0	0	0	0	0	0	0	0	0	0	0	0	0	0	0	0	0
1020	1	10915	109140000	109150000	0	0	0	0	0	0	2	0	0	0	0	0	0	0	0	0	2.33299e-05	0	0	0	0	0	0	0	0	0	0	0	1.22332e-06	0	1.22332e-06	0	0	0	0	0	0	0	0	0	0	0	0	0	0
1021	1	10916	109150000	109160000	0	0	0	0	0	0	1	0	0	0	0	0	0	0	0	0	1.16649e-05	0	0	0	0	0	0	0	0	0	0	0	6.11658e-07	0	6.11658e-07	0	0	0	0	0	0	0	0	0	0	0	0	0	0
1022	1	10917	109160000	109170000	0	0	0	0	0	0	0	0	0	0	0	0	0	0	0	0	0	0	0	0	0	0	0	0	0	0	0	0	0	0	0	0	0	0	0	0	0	0	0	0	0	0	0	0	0
1023	1	10918	109170000	109180000	0	0	0	1	0	0	0	0	0	0	0	0	0	5.21118e-06	0	0	0	0	0	0	0	0	0	0	0	0	0	0	0	1.35575e-06	1.35575e-06	0	0	0	0	0	0	0	0	0	0	0	0	0	0
1024	1	10919	109180000	109190000	0	0	0	0	0	0	1	0	0	0	0	0	0	0	0	0	1.16649e-05	0	0	0	0	0	0	0	0	0	0	0	6.11658e-07	0	6.11658e-07	0	0	0	0	0	0	0	0	0	0	0	0	0	0
1025	1	1092	10910000	10920000	0	0	0	2	0	0	0	0	0	0	0	0	0	1.04224e-05	0	0	0	0	0	0	0	0	0	0	0	0	0	0	0	2.7115e-06	2.7115e-06	0	0	0	0	0	0	0	0	0	0	0	0	0	0
1026	1	10920	109190000	109200000	0	0	0	0	0	0	0	0	0	0	0	0	0	0	0	0	0	0	0	0	0	0	0	0	0	0	0	0	0	0	0	0	0	0	0	0	0	0	0	0	0	0	0	0	0
1027	1	10921	109200000	109210000	0	0	0	0	0	0	0	0	0	0	0	0	0	0	0	0	0	0	0	0	0	0	0	0	0	0	0	0	0	0	0	0	0	0	0	0	0	0	0	0	0	0	0	0	0
1028	1	10922	109210000	109220000	0	0	0	1	0	0	0	0	0	0	0	0	0	5.21118e-06	0	0	0	0	0	0	0	0	0	0	0	0	0	0	0	1.35575e-06	1.35575e-06	0	0	0	0	0	0	0	0	0	0	0	0	0	0
1029	1	10923	109220000	109230000	0	0	0	1	0	2	0	0	0	0	0	0	0	5.21118e-06	0	2.79357e-05	0	0	0	0	0	0	0	0	0	0	0	1.03578e-06	0	1.35575e-06	2.39153e-06	0	0	0	0	0	0	0	0	0	0	0	0	0	0
1030	1	10924	109230000	109240000	0	0	0	1	0	0	0	1	0	0	0	0	0	5.21118e-06	0	0	0	2.0859e-05	0	0	0	0	0	0	0	3.59838e-06	0	0	0	1.35575e-06	4.95413e-06	0	0	0	0	0	0	0	0	0	0	0	0	0	0
1031	1	10925	109240000	109250000	0	0	0	1	1	1	0	0	0	0	0	0	0	5.21118e-06	4.48209e-05	1.39678e-05	0	0	0	0	0	0	0	0	5.43748e-06	0	0	5.17889e-07	0	1.35575e-06	7.31111e-06	0	0	0	0	0	0	0	0	0	0	0	0	0	0
1032	1	10926	109250000	109260000	0	0	0	1	0	1	0	0	0	0	0	0	0	5.21118e-06	0	1.39678e-05	0	0	0	0	0	0	0	0	0	0	0	5.17889e-07	0	1.35575e-06	1.87364e-06	0	0	0	0	0	0	0	0	0	0	0	0	0	0
1033	1	10927	109260000	109270000	0	0	0	1	0	0	0	0	0	0	0	0	0	5.21118e-06	0	0	0	0	0	0	0	0	0	0	0	0	0	0	0	1.35575e-06	1.35575e-06	0	0	0	0	0	0	0	0	0	0	0	0	0	0
1034	1	10928	109270000	109280000	0	0	0	0	0	0	0	0	0	0	0	0	0	0	0	0	0	0	0	0	0	0	0	0	0	0	0	0	0	0	0	0	0	0	0	0	0	0	0	0	0	0	0	0	0
1035	1	10929	109280000	109290000	0	0	0	1	0	0	0	0	0	0	0	0	0	5.21118e-06	0	0	0	0	0	0	0	0	0	0	0	0	0	0	0	1.35575e-06	1.35575e-06	0	0	0	0	0	0	0	0	0	0	0	0	0	0
1036	1	1093	10920000	10930000	0	0	0	0	0	0	0	0	0	0	0	0	0	0	0	0	0	0	0	0	0	0	0	0	0	0	0	0	0	0	0	0	0	0	0	0	0	0	0	0	0	0	0	0	0
1037	1	10930	109290000	109300000	0	0	0	1	0	1	0	0	0	0	0	0	0	5.21118e-06	0	1.39678e-05	0	0	0	0	0	0	0	0	0	0	0	5.17889e-07	0	1.35575e-06	1.87364e-06	0	0	0	0	0	0	0	0	0	0	0	0	0	0
1038	1	10931	109300000	109310000	0	0	0	0	0	0	0	0	0	0	0	0	0	0	0	0	0	0	0	0	0	0	0	0	0	0	0	0	0	0	0	0	0	0	0	0	0	0	0	0	0	0	0	0	0
1039	1	10932	109310000	109320000	0	0	0	3	0	0	0	0	0	0	0	0	0	1.56335e-05	0	0	0	0	0	0	0	0	0	0	0	0	0	0	0	4.06725e-06	4.06725e-06	0	0	0	0	0	0	0	0	0	0	0	0	0	0
1040	1	10933	109320000	109330000	0	0	0	1	0	0	2	0	0	0	0	0	0	5.21118e-06	0	0	2.33299e-05	0	0	0	0	0	0	0	0	0	0	0	1.22332e-06	1.35575e-06	2.57906e-06	0	0	0	0	0	0	0	0	0	0	0	0	0	0
1041	1	10934	109330000	109340000	0	0	0	2	0	0	0	0	0	0	0	0	0	1.04224e-05	0	0	0	0	0	0	0	0	0	0	0	0	0	0	0	2.7115e-06	2.7115e-06	0	0	0	0	0	0	0	0	0	0	0	0	0	0
1042	1	10935	109340000	109350000	0	0	0	0	0	0	0	0	0	0	0	0	0	0	0	0	0	0	0	0	0	0	0	0	0	0	0	0	0	0	0	0	0	0	0	0	0	0	0	0	0	0	0	0	0
1043	1	10936	109350000	109360000	0	0	0	0	0	0	0	0	0	0	0	0	0	0	0	0	0	0	0	0	0	0	0	0	0	0	0	0	0	0	0	0	0	0	0	0	0	0	0	0	0	0	0	0	0
1044	1	10937	109360000	109370000	0	0	0	0	0	0	0	0	0	0	0	0	0	0	0	0	0	0	0	0	0	0	0	0	0	0	0	0	0	0	0	0	0	0	0	0	0	0	0	0	0	0	0	0	0
1045	1	10938	109370000	109380000	0	0	0	0	0	0	0	1	0	0	0	0	0	0	0	0	0	2.0859e-05	0	0	0	0	0	0	0	3.59838e-06	0	0	0	0	3.59838e-06	0	0	0	0	0	0	0	0	0	0	0	0	0	0
1046	1	10939	109380000	109390000	0	0	0	1	0	0	0	0	0	0	0	0	0	5.21118e-06	0	0	0	0	0	0	0	0	0	0	0	0	0	0	0	1.35575e-06	1.35575e-06	0	0	0	0	0	0	0	0	0	0	0	0	0	0
1047	1	1094	10930000	10940000	0	0	0	0	0	0	0	0	0	0	0	0	0	0	0	0	0	0	0	0	0	0	0	0	0	0	0	0	0	0	0	0	0	0	0	0	0	0	0	0	0	0	0	0	0
1048	1	10940	109390000	109400000	0	0	0	0	0	0	2	0	0	0	0	0	0	0	0	0	2.33299e-05	0	0	0	0	0	0	0	0	0	0	0	1.22332e-06	0	1.22332e-06	0	0	0	0	0	0	0	0	0	0	0	0	0	0
1049	1	10941	109400000	109410000	0	0	0	0	0	0	1	0	0	0	0	0	0	0	0	0	1.16649e-05	0	0	0	0	0	0	0	0	0	0	0	6.11658e-07	0	6.11658e-07	0	0	0	0	0	0	0	0	0	0	0	0	0	0
1050	1	10942	109410000	109420000	0	0	0	7	0	0	0	0	0	0	0	0	0	3.64783e-05	0	0	0	0	0	0	0	0	0	0	0	0	0	0	0	9.49024e-06	9.49024e-06	0	0	0	0	0	0	0	0	0	0	0	0	0	0
1051	1	10943	109420000	109430000	0	0	0	1	0	0	5	0	0	0	0	0	0	5.21118e-06	0	0	5.83247e-05	0	0	0	0	0	0	0	0	0	0	0	3.05829e-06	1.35575e-06	4.41404e-06	0	0	0	0	0	0	0	0	0	0	0	0	0	0
1052	1	10944	109430000	109440000	0	0	0	1	0	0	1	0	0	0	0	0	0	5.21118e-06	0	0	1.16649e-05	0	0	0	0	0	0	0	0	0	0	0	6.11658e-07	1.35575e-06	1.96741e-06	0	0	0	0	0	0	0	0	0	0	0	0	0	0
1053	1	10945	109440000	109450000	0	0	0	4	0	0	0	0	0	0	0	0	0	2.08447e-05	0	0	0	0	0	0	0	0	0	0	0	0	0	0	0	5.42299e-06	5.42299e-06	0	0	0	0	0	0	0	0	0	0	0	0	0	0
1054	1	10946	109450000	109460000	0	0	0	1	0	1	2	0	0	0	0	0	0	5.21118e-06	0	1.39678e-05	2.33299e-05	0	0	0	0	0	0	0	0	0	0	5.17889e-07	1.22332e-06	1.35575e-06	3.09695e-06	0	0	0	0	0	0	0	0	0	0	0	0	0	0
1055	1	10947	109460000	109470000	0	0	0	0	0	0	0	0	0	0	0	0	0	0	0	0	0	0	0	0	0	0	0	0	0	0	0	0	0	0	0	0	0	0	0	0	0	0	0	0	0	0	0	0	0
1056	1	10948	109470000	109480000	0	0	0	0	0	0	0	0	0	0	0	0	0	0	0	0	0	0	0	0	0	0	0	0	0	0	0	0	0	0	0	0	0	0	0	0	0	0	0	0	0	0	0	0	0
1057	1	10949	109480000	109490000	0	0	0	0	0	0	0	1	0	0	0	0	0	0	0	0	0	2.0859e-05	0	0	0	0	0	0	0	3.59838e-06	0	0	0	0	3.59838e-06	0	0	0	0	0	0	0	0	0	0	0	0	0	0
1058	1	1095	10940000	10950000	0	0	0	1	0	0	0	0	0	0	0	0	0	5.21118e-06	0	0	0	0	0	0	0	0	0	0	0	0	0	0	0	1.35575e-06	1.35575e-06	0	0	0	0	0	0	0	0	0	0	0	0	0	0
1059	1	10950	109490000	109500000	1	0	0	0	0	0	0	0	0	0	0.000429923	0	0	0	0	0	0	0	0	0	6.1227e-05	0	0	0	0	0	0	0	0	0	6.1227e-05	0	0	0	0	0	0	0	0	0	0	0	0	0	0
1060	1	10951	109500000	109510000	0	0	0	1	0	0	0	0	0	0	0	0	0	5.21118e-06	0	0	0	0	0	0	0	0	0	0	0	0	0	0	0	1.35575e-06	1.35575e-06	0	0	0	0	0	0	0	0	0	0	0	0	0	0
1061	1	10952	109510000	109520000	0	0	0	0	0	0	0	0	0	0	0	0	0	0	0	0	0	0	0	0	0	0	0	0	0	0	0	0	0	0	0	0	0	0	0	0	0	0	0	0	0	0	0	0	0
1062	1	10953	109520000	109530000	0	0	0	0	0	0	2	0	0	0	0	0	0	0	0	0	2.33299e-05	0	0	0	0	0	0	0	0	0	0	0	1.22332e-06	0	1.22332e-06	0	0	0	0	0	0	0	0	0	0	0	0	0	0
1063	1	10954	109530000	109540000	0	0	0	0	0	0	0	1	0	0	0	0	0	0	0	0	0	2.0859e-05	0	0	0	0	0	0	0	3.59838e-06	0	0	0	0	3.59838e-06	0	0	0	0	0	0	0	0	0	0	0	0	0	0
1064	1	10955	109540000	109550000	0	0	0	1	0	0	0	0	0	0	0	0	0	5.21118e-06	0	0	0	0	0	0	0	0	0	0	0	0	0	0	0	1.35575e-06	1.35575e-06	0	0	0	0	0	0	0	0	0	0	0	0	0	0
1065	1	10956	109550000	109560000	0	0	0	1	0	0	0	0	0	0	0	0	0	5.21118e-06	0	0	0	0	0	0	0	0	0	0	0	0	0	0	0	1.35575e-06	1.35575e-06	0	0	0	0	0	0	0	0	0	0	0	0	0	0
1066	1	10957	109560000	109570000	0	0	0	0	0	0	0	0	0	0	0	0	0	0	0	0	0	0	0	0	0	0	0	0	0	0	0	0	0	0	0	0	0	0	0	0	0	0	0	0	0	0	0	0	0
1067	1	10958	109570000	109580000	0	0	0	0	0	0	0	0	0	0	0	0	0	0	0	0	0	0	0	0	0	0	0	0	0	0	0	0	0	0	0	0	0	0	0	0	0	0	0	0	0	0	0	0	0
1068	1	10959	109580000	109590000	0	0	0	0	0	0	0	0	0	4	0	0	0	0	0	0	0	0	0	0.000589797	0	0	0	7.75904e-05	0	0	0	0	0	0	7.75904e-05	0	0	0	0	0	0	0	0	0	0	0	0	0	0
1069	1	1096	10950000	10960000	0	0	0	0	0	0	0	0	2	0	0	0	0	0	0	0	0	0	3.65303e-05	0	0	0	0	0	0	0	1.31478e-06	0	0	0	1.31478e-06	0	0	0	0	0	0	0	0	0	0	0	0	0	0
1070	1	10960	109590000	109600000	0	0	0	1	0	0	2	1	1	0	0	0	0	5.21118e-06	0	0	2.33299e-05	2.0859e-05	1.82652e-05	0	0	0	0	0	0	3.59838e-06	6.57388e-07	0	1.22332e-06	1.35575e-06	6.83484e-06	0	0	0	0	0	0	0	0	0	0	0	0	0	0
1071	1	10961	109600000	109610000	0	0	0	0	0	0	0	0	0	0	0	0	0	0	0	0	0	0	0	0	0	0	0	0	0	0	0	0	0	0	0	0	0	0	0	0	0	0	0	0	0	0	0	0	0
1072	1	10962	109610000	109620000	0	0	0	0	0	1	0	0	0	0	0	0	0	0	0	1.39678e-05	0	0	0	0	0	0	0	0	0	0	0	5.17889e-07	0	0	5.17889e-07	0	0	0	0	0	0	0	0	0	0	0	0	0	0
1073	1	10963	109620000	109630000	0	0	0	0	0	0	0	0	0	0	0	0	0	0	0	0	0	0	0	0	0	0	0	0	0	0	0	0	0	0	0	0	0	0	0	0	0	0	0	0	0	0	0	0	0
1074	1	10964	109630000	109640000	0	0	0	4	0	0	1	1	0	1	0	0	0	2.08447e-05	0	0	1.16649e-05	2.0859e-05	0	0.000147449	0	0	0	1.93976e-05	0	3.59838e-06	0	0	6.11658e-07	5.42299e-06	2.90306e-05	0	0	0	0	0	0	0	0	0	0	0	0	0	0
1075	1	10965	109640000	109650000	0	0	0	3	0	1	3	0	0	0	0	0	0	1.56335e-05	0	1.39678e-05	3.49948e-05	0	0	0	0	0	0	0	0	0	0	5.17889e-07	1.83497e-06	4.06725e-06	6.42011e-06	0	0	0	0	0	0	0	0	0	0	0	0	0	0
1076	1	10966	109650000	109660000	0	0	0	0	0	3	0	0	0	0	0	0	0	0	0	4.19035e-05	0	0	0	0	0	0	0	0	0	0	0	1.55367e-06	0	0	1.55367e-06	0	0	0	0	0	0	0	0	0	0	0	0	0	0
1077	1	10967	109660000	109670000	0	0	0	1	0	1	0	0	0	0	0	0	0	5.21118e-06	0	1.39678e-05	0	0	0	0	0	0	0	0	0	0	0	5.17889e-07	0	1.35575e-06	1.87364e-06	0	0	0	0	0	0	0	0	0	0	0	0	0	0
1078	1	10968	109670000	109680000	0	0	0	3	0	0	0	0	0	0	0	0	0	1.56335e-05	0	0	0	0	0	0	0	0	0	0	0	0	0	0	0	4.06725e-06	4.06725e-06	0	0	0	0	0	0	0	0	0	0	0	0	0	0
1079	1	10969	109680000	109690000	0	0	0	2	0	0	0	0	0	0	0	0	0	1.04224e-05	0	0	0	0	0	0	0	0	0	0	0	0	0	0	0	2.7115e-06	2.7115e-06	0	0	0	0	0	0	0	0	0	0	0	0	0	0
1080	1	1097	10960000	10970000	0	0	0	0	0	0	1	0	0	0	0	0	0	0	0	0	1.16649e-05	0	0	0	0	0	0	0	0	0	0	0	6.11658e-07	0	6.11658e-07	0	0	0	0	0	0	0	0	0	0	0	0	0	0
1081	1	10970	109690000	109700000	0	0	0	1	0	0	0	0	0	0	0	0	0	5.21118e-06	0	0	0	0	0	0	0	0	0	0	0	0	0	0	0	1.35575e-06	1.35575e-06	0	0	0	0	0	0	0	0	0	0	0	0	0	0
1082	1	10971	109700000	109710000	0	0	0	2	0	0	0	1	0	0	0	0	0	1.04224e-05	0	0	0	2.0859e-05	0	0	0	0	0	0	0	3.59838e-06	0	0	0	2.7115e-06	6.30988e-06	0	0	0	0	0	0	0	0	0	0	0	0	0	0
1083	1	10972	109710000	109720000	0	0	0	0	1	3	0	0	0	0	0	0	0	0	4.48209e-05	4.19035e-05	0	0	0	0	0	0	0	0	5.43748e-06	0	0	1.55367e-06	0	0	6.99115e-06	0	0	0	0	0	0	0	0	0	0	0	0	0	0
1084	1	10973	109720000	109730000	0	0	0	0	1	0	0	0	0	0	0	0	0	0	4.48209e-05	0	0	0	0	0	0	0	0	0	5.43748e-06	0	0	0	0	0	5.43748e-06	0	0	0	0	0	0	0	0	0	0	0	0	0	0
1085	1	10974	109730000	109740000	1	0	0	2	0	0	0	1	0	0	0.000429923	0	0	1.04224e-05	0	0	0	2.0859e-05	0	0	6.1227e-05	0	0	0	0	3.59838e-06	0	0	0	2.7115e-06	6.75368e-05	0	0	0	0	0	0	0	0	0	0	0	0	0	0
1086	1	10975	109740000	109750000	0	0	0	4	0	0	0	0	0	0	0	0	0	2.08447e-05	0	0	0	0	0	0	0	0	0	0	0	0	0	0	0	5.42299e-06	5.42299e-06	0	0	0	0	0	0	0	0	0	0	0	0	0	0
1087	1	10976	109750000	109760000	0	0	0	6	0	1	0	0	0	0	0	0	0	3.12671e-05	0	1.39678e-05	0	0	0	0	0	0	0	0	0	0	0	5.17889e-07	0	8.13449e-06	8.65238e-06	0	0	0	0	0	0	0	0	0	0	0	0	0	0
1088	1	10977	109760000	109770000	0	0	0	0	0	0	0	0	0	0	0	0	0	0	0	0	0	0	0	0	0	0	0	0	0	0	0	0	0	0	0	0	0	0	0	0	0	0	0	0	0	0	0	0	0
1089	1	10978	109770000	109780000	0	0	0	0	0	2	1	0	0	0	0	0	0	0	0	2.79357e-05	1.16649e-05	0	0	0	0	0	0	0	0	0	0	1.03578e-06	6.11658e-07	0	1.64744e-06	0	0	0	0	0	0	0	0	0	0	0	0	0	0
1090	1	10979	109780000	109790000	0	0	0	3	0	0	0	0	0	0	0	0	0	1.56335e-05	0	0	0	0	0	0	0	0	0	0	0	0	0	0	0	4.06725e-06	4.06725e-06	0	0	0	0	0	0	0	0	0	0	0	0	0	0
1091	1	1098	10970000	10980000	0	0	0	0	0	0	0	0	1	0	0	0	0	0	0	0	0	0	1.82652e-05	0	0	0	0	0	0	0	6.57388e-07	0	0	0	6.57388e-07	0	0	0	0	0	0	0	0	0	0	0	0	0	0
1092	1	10980	109790000	109800000	0	0	0	0	2	0	0	1	0	0	0	0	0	0	8.96419e-05	0	0	2.0859e-05	0	0	0	0	0	0	1.0875e-05	3.59838e-06	0	0	0	0	1.44733e-05	0	0	0	0	0	0	0	0	0	0	0	0	0	0
1093	1	10981	109800000	109810000	0	0	0	1	0	0	0	0	0	0	0	0	0	5.21118e-06	0	0	0	0	0	0	0	0	0	0	0	0	0	0	0	1.35575e-06	1.35575e-06	0	0	0	0	0	0	0	0	0	0	0	0	0	0
1094	1	10982	109810000	109820000	0	0	0	5	0	1	0	0	0	0	0	0	0	2.60559e-05	0	1.39678e-05	0	0	0	0	0	0	0	0	0	0	0	5.17889e-07	0	6.77874e-06	7.29663e-06	0	0	0	0	0	0	0	0	0	0	0	0	0	0
1095	1	10983	109820000	109830000	0	0	0	3	0	2	0	0	0	0	0	0	0	1.56335e-05	0	2.79357e-05	0	0	0	0	0	0	0	0	0	0	0	1.03578e-06	0	4.06725e-06	5.10302e-06	0	0	0	0	0	0	0	0	0	0	0	0	0	0
1096	1	10984	109830000	109840000	0	0	0	0	0	0	0	1	0	1	0	0	0	0	0	0	0	2.0859e-05	0	0.000147449	0	0	0	1.93976e-05	0	3.59838e-06	0	0	0	0	2.2996e-05	0	0	0	0	0	0	0	0	0	0	0	0	0	0
1097	1	10985	109840000	109850000	0	0	0	0	0	0	0	1	0	0	0	0	0	0	0	0	0	2.0859e-05	0	0	0	0	0	0	0	3.59838e-06	0	0	0	0	3.59838e-06	0	0	0	0	0	0	0	0	0	0	0	0	0	0
1098	1	10986	109850000	109860000	0	0	0	0	0	0	0	0	0	2	0	0	0	0	0	0	0	0	0	0.000294898	0	0	0	3.87952e-05	0	0	0	0	0	0	3.87952e-05	0	0	0	0	0	0	0	0	0	0	0	0	0	0
1099	1	10987	109860000	109870000	0	0	0	1	0	0	0	0	0	0	0	0	0	5.21118e-06	0	0	0	0	0	0	0	0	0	0	0	0	0	0	0	1.35575e-06	1.35575e-06	0	0	0	0	0	0	0	0	0	0	0	0	0	0
1100	1	10988	109870000	109880000	0	0	0	0	0	3	0	0	0	0	0	0	0	0	0	4.19035e-05	0	0	0	0	0	0	0	0	0	0	0	1.55367e-06	0	0	1.55367e-06	0	0	0	0	0	0	0	0	0	0	0	0	0	0
1101	1	10989	109880000	109890000	0	0	0	0	0	0	0	0	0	0	0	0	0	0	0	0	0	0	0	0	0	0	0	0	0	0	0	0	0	0	0	0	0	0	0	0	0	0	0	0	0	0	0	0	0
1102	1	1099	10980000	10990000	0	0	0	0	0	0	0	0	1	0	0	0	0	0	0	0	0	0	1.82652e-05	0	0	0	0	0	0	0	6.57388e-07	0	0	0	6.57388e-07	0	0	0	0	0	0	0	0	0	0	0	0	0	0
1103	1	10990	109890000	109900000	0	0	0	3	0	0	0	0	0	0	0	0	0	1.56335e-05	0	0	0	0	0	0	0	0	0	0	0	0	0	0	0	4.06725e-06	4.06725e-06	0	0	0	0	0	0	0	0	0	0	0	0	0	0
1104	1	10991	109900000	109910000	0	0	0	2	0	0	0	0	0	0	0	0	0	1.04224e-05	0	0	0	0	0	0	0	0	0	0	0	0	0	0	0	2.7115e-06	2.7115e-06	0	0	0	0	0	0	0	0	0	0	0	0	0	0
1105	1	10992	109910000	109920000	0	0	0	1	0	0	0	0	0	0	0	0	0	5.21118e-06	0	0	0	0	0	0	0	0	0	0	0	0	0	0	0	1.35575e-06	1.35575e-06	0	0	0	0	0	0	0	0	0	0	0	0	0	0
1106	1	10993	109920000	109930000	0	0	0	1	0	1	0	0	0	0	0	0	0	5.21118e-06	0	1.39678e-05	0	0	0	0	0	0	0	0	0	0	0	5.17889e-07	0	1.35575e-06	1.87364e-06	0	0	0	0	0	0	0	0	0	0	0	0	0	0
1107	1	10994	109930000	109940000	0	0	0	0	0	1	0	0	0	0	0	0	0	0	0	1.39678e-05	0	0	0	0	0	0	0	0	0	0	0	5.17889e-07	0	0	5.17889e-07	0	0	0	0	0	0	0	0	0	0	0	0	0	0
1108	1	10995	109940000	109950000	0	0	0	0	0	2	0	5	0	0	0	0	0	0	0	2.79357e-05	0	0.000104295	0	0	0	0	0	0	0	1.79919e-05	0	1.03578e-06	0	0	1.90277e-05	0	0	0	0	0	0	0	0	0	0	0	0	0	0
1109	1	10996	109950000	109960000	0	0	0	1	0	0	0	0	0	0	0	0	0	5.21118e-06	0	0	0	0	0	0	0	0	0	0	0	0	0	0	0	1.35575e-06	1.35575e-06	0	0	0	0	0	0	0	0	0	0	0	0	0	0
1110	1	10997	109960000	109970000	0	0	0	5	0	0	0	0	0	0	0	0	0	2.60559e-05	0	0	0	0	0	0	0	0	0	0	0	0	0	0	0	6.77874e-06	6.77874e-06	0	0	0	0	0	0	0	0	0	0	0	0	0	0
1111	1	10998	109970000	109980000	0	0	0	1	0	0	3	0	0	0	0	0	0	5.21118e-06	0	0	3.49948e-05	0	0	0	0	0	0	0	0	0	0	0	1.83497e-06	1.35575e-06	3.19072e-06	0	0	0	0	0	0	0	0	0	0	0	0	0	0
1112	1	10999	109980000	109990000	0	0	0	3	0	0	0	1	0	0	0	0	0	1.56335e-05	0	0	0	2.0859e-05	0	0	0	0	0	0	0	3.59838e-06	0	0	0	4.06725e-06	7.66563e-06	0	0	0	0	0	0	0	0	0	0	0	0	0	0
1113	1	11	100000	110000	0	0	0	0	0	0	0	0	0	0	0	0	0	0	0	0	0	0	0	0	0	0	0	0	0	0	0	0	0	0	0	0	0	0	0	0	0	0	0	0	0	0	0	0	0
1114	1	110	1090000	1100000	0	0	0	0	0	0	0	0	6	0	0	0	0	0	0	0	0	0	0.000109591	0	0	0	0	0	0	0	3.94433e-06	0	0	0	3.94433e-06	0	0	0	0	0	0	0	0	0	0	0	0	0	0
1115	1	1100	10990000	11000000	0	0	0	0	0	0	0	0	1	0	0	0	0	0	0	0	0	0	1.82652e-05	0	0	0	0	0	0	0	6.57388e-07	0	0	0	6.57388e-07	0	0	0	0	0	0	0	0	0	0	0	0	0	0
1116	1	11000	109990000	110000000	0	0	0	0	0	2	0	0	0	0	0	0	0	0	0	2.79357e-05	0	0	0	0	0	0	0	0	0	0	0	1.03578e-06	0	0	1.03578e-06	0	0	0	0	0	0	0	0	0	0	0	0	0	0
1117	1	11001	110000000	110010000	0	0	0	0	0	0	0	0	0	0	0	0	0	0	0	0	0	0	0	0	0	0	0	0	0	0	0	0	0	0	0	0	0	0	0	0	0	0	0	0	0	0	0	0	0
1118	1	11002	110010000	110020000	0	0	0	2	0	0	0	0	0	0	0	0	0	1.04224e-05	0	0	0	0	0	0	0	0	0	0	0	0	0	0	0	2.7115e-06	2.7115e-06	0	0	0	0	0	0	0	0	0	0	0	0	0	0
1119	1	11003	110020000	110030000	0	0	0	1	0	0	0	0	0	0	0	0	0	5.21118e-06	0	0	0	0	0	0	0	0	0	0	0	0	0	0	0	1.35575e-06	1.35575e-06	0	0	0	0	0	0	0	0	0	0	0	0	0	0
1120	1	11004	110030000	110040000	0	0	0	1	0	0	0	1	0	0	0	0	0	5.21118e-06	0	0	0	2.0859e-05	0	0	0	0	0	0	0	3.59838e-06	0	0	0	1.35575e-06	4.95413e-06	0	0	0	0	0	0	0	0	0	0	0	0	0	0
1121	1	11005	110040000	110050000	0	0	0	4	0	0	0	1	0	0	0	0	0	2.08447e-05	0	0	0	2.0859e-05	0	0	0	0	0	0	0	3.59838e-06	0	0	0	5.42299e-06	9.02138e-06	0	0	0	0	0	0	0	0	0	0	0	0	0	0
1122	1	11006	110050000	110060000	0	0	0	1	0	0	0	0	0	0	0	0	0	5.21118e-06	0	0	0	0	0	0	0	0	0	0	0	0	0	0	0	1.35575e-06	1.35575e-06	0	0	0	0	0	0	0	0	0	0	0	0	0	0
1123	1	11007	110060000	110070000	0	0	0	0	0	0	0	0	0	0	0	0	0	0	0	0	0	0	0	0	0	0	0	0	0	0	0	0	0	0	0	0	0	0	0	0	0	0	0	0	0	0	0	0	0
1124	1	11008	110070000	110080000	0	0	0	0	0	0	0	0	0	0	0	0	0	0	0	0	0	0	0	0	0	0	0	0	0	0	0	0	0	0	0	0	0	0	0	0	0	0	0	0	0	0	0	0	0
1125	1	11009	110080000	110090000	0	0	0	0	0	0	3	0	0	0	0	0	0	0	0	0	3.49948e-05	0	0	0	0	0	0	0	0	0	0	0	1.83497e-06	0	1.83497e-06	0	0	0	0	0	0	0	0	0	0	0	0	0	0
1126	1	1101	11000000	11010000	0	0	0	1	0	0	2	0	0	0	0	0	0	5.21118e-06	0	0	2.33299e-05	0	0	0	0	0	0	0	0	0	0	0	1.22332e-06	1.35575e-06	2.57906e-06	0	0	0	0	0	0	0	0	0	0	0	0	0	0
1127	1	11010	110090000	110100000	0	0	0	0	0	1	0	0	0	0	0	0	0	0	0	1.39678e-05	0	0	0	0	0	0	0	0	0	0	0	5.17889e-07	0	0	5.17889e-07	0	0	0	0	0	0	0	0	0	0	0	0	0	0
1128	1	11011	110100000	110110000	0	0	0	0	0	1	1	0	0	0	0	0	0	0	0	1.39678e-05	1.16649e-05	0	0	0	0	0	0	0	0	0	0	5.17889e-07	6.11658e-07	0	1.12955e-06	0	0	0	0	0	0	0	0	0	0	0	0	0	0
1129	1	11012	110110000	110120000	0	0	0	2	0	1	0	0	0	0	0	0	0	1.04224e-05	0	1.39678e-05	0	0	0	0	0	0	0	0	0	0	0	5.17889e-07	0	2.7115e-06	3.22939e-06	0	0	0	0	0	0	0	0	0	0	0	0	0	0
1130	1	11013	110120000	110130000	0	0	0	0	0	0	0	0	0	0	0	0	0	0	0	0	0	0	0	0	0	0	0	0	0	0	0	0	0	0	0	0	0	0	0	0	0	0	0	0	0	0	0	0	0
1131	1	11014	110130000	110140000	0	0	0	0	0	0	0	0	0	0	0	0	0	0	0	0	0	0	0	0	0	0	0	0	0	0	0	0	0	0	0	0	0	0	0	0	0	0	0	0	0	0	0	0	0
1132	1	11015	110140000	110150000	0	0	0	2	0	0	0	0	0	0	0	0	0	1.04224e-05	0	0	0	0	0	0	0	0	0	0	0	0	0	0	0	2.7115e-06	2.7115e-06	0	0	0	0	0	0	0	0	0	0	0	0	0	0
1133	1	11016	110150000	110160000	0	0	0	1	0	0	0	0	0	0	0	0	0	5.21118e-06	0	0	0	0	0	0	0	0	0	0	0	0	0	0	0	1.35575e-06	1.35575e-06	0	0	0	0	0	0	0	0	0	0	0	0	0	0
1134	1	11017	110160000	110170000	0	0	0	0	0	0	0	0	0	0	0	0	0	0	0	0	0	0	0	0	0	0	0	0	0	0	0	0	0	0	0	0	0	0	0	0	0	0	0	0	0	0	0	0	0
1135	1	11018	110170000	110180000	0	0	0	0	0	0	2	0	0	0	0	0	0	0	0	0	2.33299e-05	0	0	0	0	0	0	0	0	0	0	0	1.22332e-06	0	1.22332e-06	0	0	0	0	0	0	0	0	0	0	0	0	0	0
1136	1	11019	110180000	110190000	0	0	0	0	0	0	0	0	0	0	0	0	0	0	0	0	0	0	0	0	0	0	0	0	0	0	0	0	0	0	0	0	0	0	0	0	0	0	0	0	0	0	0	0	0
1137	1	1102	11010000	11020000	0	1	0	1	0	1	0	0	0	0	0	0.000392773	0	5.21118e-06	0	1.39678e-05	0	0	0	0	0	0	2.68104e-06	0	0	0	0	5.17889e-07	0	1.35575e-06	4.55468e-06	0	0	0	0	0	0	0	0	0	0	0	0	0	0
1138	1	11020	110190000	110200000	0	0	0	0	0	0	0	0	1	0	0	0	0	0	0	0	0	0	1.82652e-05	0	0	0	0	0	0	0	6.57388e-07	0	0	0	6.57388e-07	0	0	0	0	0	0	0	0	0	0	0	0	0	0
1139	1	11021	110200000	110210000	0	0	0	0	0	0	3	0	1	0	0	0	0	0	0	0	3.49948e-05	0	1.82652e-05	0	0	0	0	0	0	0	6.57388e-07	0	1.83497e-06	0	2.49236e-06	0	0	0	0	0	0	0	0	0	0	0	0	0	0
1140	1	11022	110210000	110220000	0	0	0	0	0	0	1	0	0	0	0	0	0	0	0	0	1.16649e-05	0	0	0	0	0	0	0	0	0	0	0	6.11658e-07	0	6.11658e-07	0	0	0	0	0	0	0	0	0	0	0	0	0	0
1141	1	11023	110220000	110230000	0	0	0	0	0	0	0	0	0	0	0	0	0	0	0	0	0	0	0	0	0	0	0	0	0	0	0	0	0	0	0	0	0	0	0	0	0	0	0	0	0	0	0	0	0
1142	1	11024	110230000	110240000	0	0	0	0	0	0	0	0	0	0	0	0	0	0	0	0	0	0	0	0	0	0	0	0	0	0	0	0	0	0	0	0	0	0	0	0	0	0	0	0	0	0	0	0	0
1143	1	11025	110240000	110250000	0	0	0	0	0	0	0	0	0	0	0	0	0	0	0	0	0	0	0	0	0	0	0	0	0	0	0	0	0	0	0	0	0	0	0	0	0	0	0	0	0	0	0	0	0
1144	1	11026	110250000	110260000	0	0	0	0	0	3	1	0	0	0	0	0	0	0	0	4.19035e-05	1.16649e-05	0	0	0	0	0	0	0	0	0	0	1.55367e-06	6.11658e-07	0	2.16533e-06	0	0	0	0	0	0	0	0	0	0	0	0	0	0
1145	1	11027	110260000	110270000	0	0	0	2	0	0	1	0	0	0	0	0	0	1.04224e-05	0	0	1.16649e-05	0	0	0	0	0	0	0	0	0	0	0	6.11658e-07	2.7115e-06	3.32315e-06	0	0	0	0	0	0	0	0	0	0	0	0	0	0
1146	1	11028	110270000	110280000	0	0	0	2	0	0	0	0	0	0	0	0	0	1.04224e-05	0	0	0	0	0	0	0	0	0	0	0	0	0	0	0	2.7115e-06	2.7115e-06	0	0	0	0	0	0	0	0	0	0	0	0	0	0
1147	1	11029	110280000	110290000	0	0	0	0	0	0	1	0	0	0	0	0	0	0	0	0	1.16649e-05	0	0	0	0	0	0	0	0	0	0	0	6.11658e-07	0	6.11658e-07	0	0	0	0	0	0	0	0	0	0	0	0	0	0
1148	1	1103	11020000	11030000	0	2	0	0	0	2	0	0	0	0	0	0.000785546	0	0	0	2.79357e-05	0	0	0	0	0	0	5.36209e-06	0	0	0	0	1.03578e-06	0	0	6.39787e-06	0	0	0	0	0	0	0	0	0	0	0	0	0	0
1149	1	11030	110290000	110300000	0	0	0	0	0	0	0	0	0	0	0	0	0	0	0	0	0	0	0	0	0	0	0	0	0	0	0	0	0	0	0	0	0	0	0	0	0	0	0	0	0	0	0	0	0
1150	1	11031	110300000	110310000	0	0	0	1	0	0	0	0	0	0	0	0	0	5.21118e-06	0	0	0	0	0	0	0	0	0	0	0	0	0	0	0	1.35575e-06	1.35575e-06	0	0	0	0	0	0	0	0	0	0	0	0	0	0
1151	1	11032	110310000	110320000	0	0	0	0	0	0	0	0	0	0	0	0	0	0	0	0	0	0	0	0	0	0	0	0	0	0	0	0	0	0	0	0	0	0	0	0	0	0	0	0	0	0	0	0	0
1152	1	11033	110320000	110330000	0	0	0	0	0	0	0	0	0	0	0	0	0	0	0	0	0	0	0	0	0	0	0	0	0	0	0	0	0	0	0	0	0	0	0	0	0	0	0	0	0	0	0	0	0
1153	1	11034	110330000	110340000	0	0	0	2	0	0	0	0	0	0	0	0	0	1.04224e-05	0	0	0	0	0	0	0	0	0	0	0	0	0	0	0	2.7115e-06	2.7115e-06	0	0	0	0	0	0	0	0	0	0	0	0	0	0
1154	1	11035	110340000	110350000	0	0	0	1	0	2	0	0	0	0	0	0	0	5.21118e-06	0	2.79357e-05	0	0	0	0	0	0	0	0	0	0	0	1.03578e-06	0	1.35575e-06	2.39153e-06	0	0	0	0	0	0	0	0	0	0	0	0	0	0
1155	1	11036	110350000	110360000	0	0	0	0	0	0	0	0	0	0	0	0	0	0	0	0	0	0	0	0	0	0	0	0	0	0	0	0	0	0	0	0	0	0	0	0	0	0	0	0	0	0	0	0	0
1156	1	11037	110360000	110370000	0	0	0	0	0	0	0	0	0	0	0	0	0	0	0	0	0	0	0	0	0	0	0	0	0	0	0	0	0	0	0	0	0	0	0	0	0	0	0	0	0	0	0	0	0
1157	1	11038	110370000	110380000	0	0	0	2	0	2	0	0	0	0	0	0	0	1.04224e-05	0	2.79357e-05	0	0	0	0	0	0	0	0	0	0	0	1.03578e-06	0	2.7115e-06	3.74728e-06	0	0	0	0	0	0	0	0	0	0	0	0	0	0
1158	1	11039	110380000	110390000	0	0	0	0	0	0	0	0	0	0	0	0	0	0	0	0	0	0	0	0	0	0	0	0	0	0	0	0	0	0	0	0	0	0	0	0	0	0	0	0	0	0	0	0	0
1159	1	1104	11030000	11040000	0	1	0	0	0	0	0	0	0	0	0	0.000392773	0	0	0	0	0	0	0	0	0	0	2.68104e-06	0	0	0	0	0	0	0	2.68104e-06	0	0	0	0	0	0	0	0	0	0	0	0	0	0
1160	1	11040	110390000	110400000	0	0	0	2	0	1	0	0	0	0	0	0	0	1.04224e-05	0	1.39678e-05	0	0	0	0	0	0	0	0	0	0	0	5.17889e-07	0	2.7115e-06	3.22939e-06	0	0	0	0	0	0	0	0	0	0	0	0	0	0
1161	1	11041	110400000	110410000	0	0	0	0	0	1	0	0	0	0	0	0	0	0	0	1.39678e-05	0	0	0	0	0	0	0	0	0	0	0	5.17889e-07	0	0	5.17889e-07	0	0	0	0	0	0	0	0	0	0	0	0	0	0
1162	1	11042	110410000	110420000	0	0	0	0	0	0	0	0	0	0	0	0	0	0	0	0	0	0	0	0	0	0	0	0	0	0	0	0	0	0	0	0	0	0	0	0	0	0	0	0	0	0	0	0	0
1163	1	11043	110420000	110430000	0	0	0	0	0	0	0	0	0	0	0	0	0	0	0	0	0	0	0	0	0	0	0	0	0	0	0	0	0	0	0	0	0	0	0	0	0	0	0	0	0	0	0	0	0
1164	1	11044	110430000	110440000	0	0	0	0	0	0	3	0	0	0	0	0	0	0	0	0	3.49948e-05	0	0	0	0	0	0	0	0	0	0	0	1.83497e-06	0	1.83497e-06	0	0	0	0	0	0	0	0	0	0	0	0	0	0
1165	1	11045	110440000	110450000	0	0	0	2	0	2	1	0	0	0	0	0	0	1.04224e-05	0	2.79357e-05	1.16649e-05	0	0	0	0	0	0	0	0	0	0	1.03578e-06	6.11658e-07	2.7115e-06	4.35893e-06	0	0	0	0	0	0	0	0	0	0	0	0	0	0
1166	1	11046	110450000	110460000	0	0	0	0	0	2	0	0	0	0	0	0	0	0	0	2.79357e-05	0	0	0	0	0	0	0	0	0	0	0	1.03578e-06	0	0	1.03578e-06	0	0	0	0	0	0	0	0	0	0	0	0	0	0
1167	1	11047	110460000	110470000	0	0	0	1	0	0	1	0	1	0	0	0	0	5.21118e-06	0	0	1.16649e-05	0	1.82652e-05	0	0	0	0	0	0	0	6.57388e-07	0	6.11658e-07	1.35575e-06	2.62479e-06	0	0	0	0	0	0	0	0	0	0	0	0	0	0
1168	1	11048	110470000	110480000	0	0	0	2	0	0	2	0	0	2	0	0	0	1.04224e-05	0	0	2.33299e-05	0	0	0.000294898	0	0	0	3.87952e-05	0	0	0	0	1.22332e-06	2.7115e-06	4.273e-05	0	0	0	0	0	0	0	0	0	0	0	0	0	0
1169	1	11049	110480000	110490000	0	0	0	0	0	2	0	0	0	2	0	0	0	0	0	2.79357e-05	0	0	0	0.000294898	0	0	0	3.87952e-05	0	0	0	1.03578e-06	0	0	3.9831e-05	0	0	0	0	0	0	0	0	0	0	0	0	0	0
1170	1	1105	11040000	11050000	0	0	0	0	0	0	1	0	0	0	0	0	0	0	0	0	1.16649e-05	0	0	0	0	0	0	0	0	0	0	0	6.11658e-07	0	6.11658e-07	0	0	0	0	0	0	0	0	0	0	0	0	0	0
1171	1	11050	110490000	110500000	0	0	0	2	0	2	2	0	0	0	0	0	0	1.04224e-05	0	2.79357e-05	2.33299e-05	0	0	0	0	0	0	0	0	0	0	1.03578e-06	1.22332e-06	2.7115e-06	4.97059e-06	0	0	0	0	0	0	0	0	0	0	0	0	0	0
1172	1	11051	110500000	110510000	0	0	0	0	0	0	2	0	0	0	0	0	0	0	0	0	2.33299e-05	0	0	0	0	0	0	0	0	0	0	0	1.22332e-06	0	1.22332e-06	0	0	0	0	0	0	0	0	0	0	0	0	0	0
1173	1	11052	110510000	110520000	0	0	0	1	0	0	0	0	0	0	0	0	0	5.21118e-06	0	0	0	0	0	0	0	0	0	0	0	0	0	0	0	1.35575e-06	1.35575e-06	0	0	0	0	0	0	0	0	0	0	0	0	0	0
1174	1	11053	110520000	110530000	0	0	0	1	0	0	1	0	0	0	0	0	0	5.21118e-06	0	0	1.16649e-05	0	0	0	0	0	0	0	0	0	0	0	6.11658e-07	1.35575e-06	1.96741e-06	0	0	0	0	0	0	0	0	0	0	0	0	0	0
1175	1	11054	110530000	110540000	0	0	0	0	0	0	0	0	0	0	0	0	0	0	0	0	0	0	0	0	0	0	0	0	0	0	0	0	0	0	0	0	0	0	0	0	0	0	0	0	0	0	0	0	0
1176	1	11055	110540000	110550000	0	0	0	1	0	0	1	0	0	0	0	0	0	5.21118e-06	0	0	1.16649e-05	0	0	0	0	0	0	0	0	0	0	0	6.11658e-07	1.35575e-06	1.96741e-06	0	0	0	0	0	0	0	0	0	0	0	0	0	0
1177	1	11056	110550000	110560000	0	0	0	1	0	0	1	0	0	0	0	0	0	5.21118e-06	0	0	1.16649e-05	0	0	0	0	0	0	0	0	0	0	0	6.11658e-07	1.35575e-06	1.96741e-06	0	0	0	0	0	0	0	0	0	0	0	0	0	0
1178	1	11057	110560000	110570000	0	0	0	0	0	0	0	0	0	0	0	0	0	0	0	0	0	0	0	0	0	0	0	0	0	0	0	0	0	0	0	0	0	0	0	0	0	0	0	0	0	0	0	0	0
1179	1	11058	110570000	110580000	0	0	0	4	0	0	3	0	0	0	0	0	0	2.08447e-05	0	0	3.49948e-05	0	0	0	0	0	0	0	0	0	0	0	1.83497e-06	5.42299e-06	7.25797e-06	0	0	0	0	0	0	0	0	0	0	0	0	0	0
1180	1	11059	110580000	110590000	0	0	0	1	0	1	0	0	0	0	0	0	0	5.21118e-06	0	1.39678e-05	0	0	0	0	0	0	0	0	0	0	0	5.17889e-07	0	1.35575e-06	1.87364e-06	0	0	0	0	0	0	0	0	0	0	0	0	0	0
1181	1	1106	11050000	11060000	0	0	0	0	0	0	0	0	0	0	0	0	0	0	0	0	0	0	0	0	0	0	0	0	0	0	0	0	0	0	0	0	0	0	0	0	0	0	0	0	0	0	0	0	0
1182	1	11060	110590000	110600000	0	0	0	1	0	0	0	0	0	0	0	0	0	5.21118e-06	0	0	0	0	0	0	0	0	0	0	0	0	0	0	0	1.35575e-06	1.35575e-06	0	0	0	0	0	0	0	0	0	0	0	0	0	0
1183	1	11061	110600000	110610000	0	0	0	0	1	3	0	0	0	0	0	0	0	0	4.48209e-05	4.19035e-05	0	0	0	0	0	0	0	0	5.43748e-06	0	0	1.55367e-06	0	0	6.99115e-06	0	0	0	0	0	0	0	0	0	0	0	0	0	0
1184	1	11062	110610000	110620000	0	0	0	0	0	0	0	0	0	0	0	0	0	0	0	0	0	0	0	0	0	0	0	0	0	0	0	0	0	0	0	0	0	0	0	0	0	0	0	0	0	0	0	0	0
1185	1	11063	110620000	110630000	0	0	0	0	1	0	0	0	0	0	0	0	0	0	4.48209e-05	0	0	0	0	0	0	0	0	0	5.43748e-06	0	0	0	0	0	5.43748e-06	0	0	0	0	0	0	0	0	0	0	0	0	0	0
1186	1	11064	110630000	110640000	0	0	0	0	0	0	0	0	0	0	0	0	0	0	0	0	0	0	0	0	0	0	0	0	0	0	0	0	0	0	0	0	0	0	0	0	0	0	0	0	0	0	0	0	0
1187	1	11065	110640000	110650000	0	0	0	1	0	0	0	0	0	0	0	0	0	5.21118e-06	0	0	0	0	0	0	0	0	0	0	0	0	0	0	0	1.35575e-06	1.35575e-06	0	0	0	0	0	0	0	0	0	0	0	0	0	0
1188	1	11066	110650000	110660000	0	0	0	0	0	0	0	0	0	0	0	0	0	0	0	0	0	0	0	0	0	0	0	0	0	0	0	0	0	0	0	0	0	0	0	0	0	0	0	0	0	0	0	0	0
1189	1	11067	110660000	110670000	0	0	0	0	0	0	1	0	0	0	0	0	0	0	0	0	1.16649e-05	0	0	0	0	0	0	0	0	0	0	0	6.11658e-07	0	6.11658e-07	0	0	0	0	0	0	0	0	0	0	0	0	0	0
1190	1	11068	110670000	110680000	0	0	0	1	0	0	1	0	0	0	0	0	0	5.21118e-06	0	0	1.16649e-05	0	0	0	0	0	0	0	0	0	0	0	6.11658e-07	1.35575e-06	1.96741e-06	0	0	0	0	0	0	0	0	0	0	0	0	0	0
1191	1	11069	110680000	110690000	0	0	0	0	0	0	0	0	1	0	0	0	0	0	0	0	0	0	1.82652e-05	0	0	0	0	0	0	0	6.57388e-07	0	0	0	6.57388e-07	0	0	0	0	0	0	0	0	0	0	0	0	0	0
1192	1	1107	11060000	11070000	0	0	0	2	0	0	0	0	0	0	0	0	0	1.04224e-05	0	0	0	0	0	0	0	0	0	0	0	0	0	0	0	2.7115e-06	2.7115e-06	0	0	0	0	0	0	0	0	0	0	0	0	0	0
1193	1	11070	110690000	110700000	0	0	0	1	0	0	0	0	0	0	0	0	0	5.21118e-06	0	0	0	0	0	0	0	0	0	0	0	0	0	0	0	1.35575e-06	1.35575e-06	0	0	0	0	0	0	0	0	0	0	0	0	0	0
1194	1	11071	110700000	110710000	0	0	0	0	0	0	0	0	0	0	0	0	0	0	0	0	0	0	0	0	0	0	0	0	0	0	0	0	0	0	0	0	0	0	0	0	0	0	0	0	0	0	0	0	0
1195	1	11072	110710000	110720000	0	0	0	1	0	0	1	0	0	0	0	0	0	5.21118e-06	0	0	1.16649e-05	0	0	0	0	0	0	0	0	0	0	0	6.11658e-07	1.35575e-06	1.96741e-06	0	0	0	0	0	0	0	0	0	0	0	0	0	0
1196	1	11073	110720000	110730000	0	0	0	0	0	0	0	4	0	0	0	0	0	0	0	0	0	8.34359e-05	0	0	0	0	0	0	0	1.43935e-05	0	0	0	0	1.43935e-05	0	0	0	0	0	0	0	0	0	0	0	0	0	0
1197	1	11074	110730000	110740000	0	0	0	0	0	0	0	0	0	0	0	0	0	0	0	0	0	0	0	0	0	0	0	0	0	0	0	0	0	0	0	0	0	0	0	0	0	0	0	0	0	0	0	0	0
1198	1	11075	110740000	110750000	0	0	0	0	0	0	0	0	0	0	0	0	0	0	0	0	0	0	0	0	0	0	0	0	0	0	0	0	0	0	0	0	0	0	0	0	0	0	0	0	0	0	0	0	0
1199	1	11076	110750000	110760000	0	0	0	0	0	0	0	0	0	0	0	0	0	0	0	0	0	0	0	0	0	0	0	0	0	0	0	0	0	0	0	0	0	0	0	0	0	0	0	0	0	0	0	0	0
1200	1	11077	110760000	110770000	0	0	0	2	0	0	0	0	0	0	0	0	0	1.04224e-05	0	0	0	0	0	0	0	0	0	0	0	0	0	0	0	2.7115e-06	2.7115e-06	0	0	0	0	0	0	0	0	0	0	0	0	0	0
1201	1	11078	110770000	110780000	0	0	0	0	0	0	0	3	0	0	0	0	0	0	0	0	0	6.25769e-05	0	0	0	0	0	0	0	1.07951e-05	0	0	0	0	1.07951e-05	0	0	0	0	0	0	0	0	0	0	0	0	0	0
1202	1	11079	110780000	110790000	0	0	0	0	0	2	0	0	0	0	0	0	0	0	0	2.79357e-05	0	0	0	0	0	0	0	0	0	0	0	1.03578e-06	0	0	1.03578e-06	0	0	0	0	0	0	0	0	0	0	0	0	0	0
1203	1	1108	11070000	11080000	0	0	0	2	0	1	0	0	0	0	0	0	0	1.04224e-05	0	1.39678e-05	0	0	0	0	0	0	0	0	0	0	0	5.17889e-07	0	2.7115e-06	3.22939e-06	0	0	0	0	0	0	0	0	0	0	0	0	0	0
1204	1	11080	110790000	110800000	0	0	0	0	0	0	0	0	0	0	0	0	0	0	0	0	0	0	0	0	0	0	0	0	0	0	0	0	0	0	0	0	0	0	0	0	0	0	0	0	0	0	0	0	0
1205	1	11081	110800000	110810000	0	0	0	0	0	0	0	0	0	0	0	0	0	0	0	0	0	0	0	0	0	0	0	0	0	0	0	0	0	0	0	0	0	0	0	0	0	0	0	0	0	0	0	0	0
1206	1	11082	110810000	110820000	0	0	0	0	0	0	0	0	0	0	0	0	0	0	0	0	0	0	0	0	0	0	0	0	0	0	0	0	0	0	0	0	0	0	0	0	0	0	0	0	0	0	0	0	0
1207	1	11083	110820000	110830000	0	0	0	0	0	0	0	0	0	0	0	0	0	0	0	0	0	0	0	0	0	0	0	0	0	0	0	0	0	0	0	0	0	0	0	0	0	0	0	0	0	0	0	0	0
1208	1	11084	110830000	110840000	0	0	0	0	0	0	2	0	0	0	0	0	0	0	0	0	2.33299e-05	0	0	0	0	0	0	0	0	0	0	0	1.22332e-06	0	1.22332e-06	0	0	0	0	0	0	0	0	0	0	0	0	0	0
1209	1	11085	110840000	110850000	0	0	0	0	0	0	0	0	0	0	0	0	0	0	0	0	0	0	0	0	0	0	0	0	0	0	0	0	0	0	0	0	0	0	0	0	0	0	0	0	0	0	0	0	0
1210	1	11086	110850000	110860000	0	0	0	0	0	0	2	0	0	0	0	0	0	0	0	0	2.33299e-05	0	0	0	0	0	0	0	0	0	0	0	1.22332e-06	0	1.22332e-06	0	0	0	0	0	0	0	0	0	0	0	0	0	0
1211	1	11087	110860000	110870000	0	0	0	0	0	0	0	0	0	0	0	0	0	0	0	0	0	0	0	0	0	0	0	0	0	0	0	0	0	0	0	0	0	0	0	0	0	0	0	0	0	0	0	0	0
1212	1	11088	110870000	110880000	0	0	0	0	0	0	0	0	0	0	0	0	0	0	0	0	0	0	0	0	0	0	0	0	0	0	0	0	0	0	0	0	0	0	0	0	0	0	0	0	0	0	0	0	0
1213	1	11089	110880000	110890000	0	0	0	0	0	0	0	0	0	0	0	0	0	0	0	0	0	0	0	0	0	0	0	0	0	0	0	0	0	0	0	0	0	0	0	0	0	0	0	0	0	0	0	0	0
1214	1	1109	11080000	11090000	0	0	0	2	0	0	0	0	0	0	0	0	0	1.04224e-05	0	0	0	0	0	0	0	0	0	0	0	0	0	0	0	2.7115e-06	2.7115e-06	0	0	0	0	0	0	0	0	0	0	0	0	0	0
1215	1	11090	110890000	110900000	0	0	0	0	0	0	2	1	0	0	0	0	0	0	0	0	2.33299e-05	2.0859e-05	0	0	0	0	0	0	0	3.59838e-06	0	0	1.22332e-06	0	4.8217e-06	0	0	0	0	0	0	0	0	0	0	0	0	0	0
1216	1	11091	110900000	110910000	0	0	0	1	0	0	0	0	0	0	0	0	0	5.21118e-06	0	0	0	0	0	0	0	0	0	0	0	0	0	0	0	1.35575e-06	1.35575e-06	0	0	0	0	0	0	0	0	0	0	0	0	0	0
1217	1	11092	110910000	110920000	0	0	0	0	0	0	0	0	0	0	0	0	0	0	0	0	0	0	0	0	0	0	0	0	0	0	0	0	0	0	0	0	0	0	0	0	0	0	0	0	0	0	0	0	0
1218	1	11093	110920000	110930000	0	0	0	0	0	0	0	0	0	0	0	0	0	0	0	0	0	0	0	0	0	0	0	0	0	0	0	0	0	0	0	0	0	0	0	0	0	0	0	0	0	0	0	0	0
1219	1	11094	110930000	110940000	0	0	0	0	0	0	0	0	0	0	0	0	0	0	0	0	0	0	0	0	0	0	0	0	0	0	0	0	0	0	0	0	0	0	0	0	0	0	0	0	0	0	0	0	0
1220	1	11095	110940000	110950000	0	0	0	0	0	0	0	0	0	0	0	0	0	0	0	0	0	0	0	0	0	0	0	0	0	0	0	0	0	0	0	0	0	0	0	0	0	0	0	0	0	0	0	0	0
1221	1	11096	110950000	110960000	0	0	0	0	0	0	2	2	0	0	0	0	0	0	0	0	2.33299e-05	4.17179e-05	0	0	0	0	0	0	0	7.19677e-06	0	0	1.22332e-06	0	8.42008e-06	0	0	0	0	0	0	0	0	0	0	0	0	0	0
1222	1	11097	110960000	110970000	0	0	0	0	0	0	0	0	0	0	0	0	0	0	0	0	0	0	0	0	0	0	0	0	0	0	0	0	0	0	0	0	0	0	0	0	0	0	0	0	0	0	0	0	0
1223	1	11098	110970000	110980000	0	0	0	1	0	0	0	0	0	0	0	0	0	5.21118e-06	0	0	0	0	0	0	0	0	0	0	0	0	0	0	0	1.35575e-06	1.35575e-06	0	0	0	0	0	0	0	0	0	0	0	0	0	0
1224	1	11099	110980000	110990000	0	0	0	1	0	0	0	0	0	0	0	0	0	5.21118e-06	0	0	0	0	0	0	0	0	0	0	0	0	0	0	0	1.35575e-06	1.35575e-06	0	0	0	0	0	0	0	0	0	0	0	0	0	0
1225	1	111	1100000	1110000	0	0	0	0	0	0	3	0	3	0	0	0	0	0	0	0	3.49948e-05	0	5.47955e-05	0	0	0	0	0	0	0	1.97216e-06	0	1.83497e-06	0	3.80714e-06	0	0	0	0	0	0	0	0	0	0	0	0	0	0
1226	1	1110	11090000	11100000	0	0	0	0	1	0	0	0	0	0	0	0	0	0	4.48209e-05	0	0	0	0	0	0	0	0	0	5.43748e-06	0	0	0	0	0	5.43748e-06	0	0	0	0	0	0	0	0	0	0	0	0	0	0
1227	1	11100	110990000	111000000	0	0	0	4	0	0	0	0	0	0	0	0	0	2.08447e-05	0	0	0	0	0	0	0	0	0	0	0	0	0	0	0	5.42299e-06	5.42299e-06	0	0	0	0	0	0	0	0	0	0	0	0	0	0
1228	1	11101	111000000	111010000	0	0	0	6	0	1	0	0	0	0	0	0	0	3.12671e-05	0	1.39678e-05	0	0	0	0	0	0	0	0	0	0	0	5.17889e-07	0	8.13449e-06	8.65238e-06	0	0	0	0	0	0	0	0	0	0	0	0	0	0
1229	1	11102	111010000	111020000	0	0	0	1	0	0	1	0	0	0	0	0	0	5.21118e-06	0	0	1.16649e-05	0	0	0	0	0	0	0	0	0	0	0	6.11658e-07	1.35575e-06	1.96741e-06	0	0	0	0	0	0	0	0	0	0	0	0	0	0
1230	1	11103	111020000	111030000	0	0	0	1	0	0	3	0	0	0	0	0	0	5.21118e-06	0	0	3.49948e-05	0	0	0	0	0	0	0	0	0	0	0	1.83497e-06	1.35575e-06	3.19072e-06	0	0	0	0	0	0	0	0	0	0	0	0	0	0
1231	1	11104	111030000	111040000	0	0	0	0	0	0	0	0	0	0	0	0	0	0	0	0	0	0	0	0	0	0	0	0	0	0	0	0	0	0	0	0	0	0	0	0	0	0	0	0	0	0	0	0	0
1232	1	11105	111040000	111050000	0	0	0	0	0	0	0	0	0	0	0	0	0	0	0	0	0	0	0	0	0	0	0	0	0	0	0	0	0	0	0	0	0	0	0	0	0	0	0	0	0	0	0	0	0
1233	1	11106	111050000	111060000	0	0	0	0	0	0	0	0	0	0	0	0	0	0	0	0	0	0	0	0	0	0	0	0	0	0	0	0	0	0	0	0	0	0	0	0	0	0	0	0	0	0	0	0	0
1234	1	11107	111060000	111070000	0	0	0	0	0	0	0	0	1	0	0	0	0	0	0	0	0	0	1.82652e-05	0	0	0	0	0	0	0	6.57388e-07	0	0	0	6.57388e-07	0	0	0	0	0	0	0	0	0	0	0	0	0	0
1235	1	11108	111070000	111080000	0	0	0	0	0	0	0	0	0	0	0	0	0	0	0	0	0	0	0	0	0	0	0	0	0	0	0	0	0	0	0	0	0	0	0	0	0	0	0	0	0	0	0	0	0
1236	1	11109	111080000	111090000	0	0	0	0	0	0	0	0	0	0	0	0	0	0	0	0	0	0	0	0	0	0	0	0	0	0	0	0	0	0	0	0	0	0	0	0	0	0	0	0	0	0	0	0	0
1237	1	1111	11100000	11110000	0	0	0	4	0	0	0	0	0	0	0	0	0	2.08447e-05	0	0	0	0	0	0	0	0	0	0	0	0	0	0	0	5.42299e-06	5.42299e-06	0	0	0	0	0	0	0	0	0	0	0	0	0	0
1238	1	11110	111090000	111100000	0	0	0	0	0	0	0	0	0	0	0	0	0	0	0	0	0	0	0	0	0	0	0	0	0	0	0	0	0	0	0	0	0	0	0	0	0	0	0	0	0	0	0	0	0
1239	1	11111	111100000	111110000	0	0	0	0	0	0	0	0	0	0	0	0	0	0	0	0	0	0	0	0	0	0	0	0	0	0	0	0	0	0	0	0	0	0	0	0	0	0	0	0	0	0	0	0	0
1240	1	11112	111110000	111120000	0	0	0	0	0	2	0	0	0	0	0	0	0	0	0	2.79357e-05	0	0	0	0	0	0	0	0	0	0	0	1.03578e-06	0	0	1.03578e-06	0	0	0	0	0	0	0	0	0	0	0	0	0	0
1241	1	11113	111120000	111130000	0	0	0	3	0	1	0	0	0	0	0	0	0	1.56335e-05	0	1.39678e-05	0	0	0	0	0	0	0	0	0	0	0	5.17889e-07	0	4.06725e-06	4.58513e-06	0	0	0	0	0	0	0	0	0	0	0	0	0	0
1242	1	11114	111130000	111140000	0	0	0	1	0	0	0	1	1	0	0	0	0	5.21118e-06	0	0	0	2.0859e-05	1.82652e-05	0	0	0	0	0	0	3.59838e-06	6.57388e-07	0	0	1.35575e-06	5.61152e-06	0	0	0	0	0	0	0	0	0	0	0	0	0	0
1243	1	11115	111140000	111150000	0	0	0	0	0	0	1	0	0	0	0	0	0	0	0	0	1.16649e-05	0	0	0	0	0	0	0	0	0	0	0	6.11658e-07	0	6.11658e-07	0	0	0	0	0	0	0	0	0	0	0	0	0	0
1244	1	11116	111150000	111160000	0	0	0	0	0	0	2	0	0	0	0	0	0	0	0	0	2.33299e-05	0	0	0	0	0	0	0	0	0	0	0	1.22332e-06	0	1.22332e-06	0	0	0	0	0	0	0	0	0	0	0	0	0	0
1245	1	11117	111160000	111170000	0	0	0	0	0	0	2	0	0	0	0	0	0	0	0	0	2.33299e-05	0	0	0	0	0	0	0	0	0	0	0	1.22332e-06	0	1.22332e-06	0	0	0	0	0	0	0	0	0	0	0	0	0	0
1246	1	11118	111170000	111180000	0	0	0	1	0	0	0	0	0	0	0	0	0	5.21118e-06	0	0	0	0	0	0	0	0	0	0	0	0	0	0	0	1.35575e-06	1.35575e-06	0	0	0	0	0	0	0	0	0	0	0	0	0	0
1247	1	11119	111180000	111190000	0	0	0	1	0	0	0	0	0	0	0	0	0	5.21118e-06	0	0	0	0	0	0	0	0	0	0	0	0	0	0	0	1.35575e-06	1.35575e-06	0	0	0	0	0	0	0	0	0	0	0	0	0	0
1248	1	1112	11110000	11120000	0	0	0	0	1	0	0	0	0	0	0	0	0	0	4.48209e-05	0	0	0	0	0	0	0	0	0	5.43748e-06	0	0	0	0	0	5.43748e-06	0	0	0	0	0	0	0	0	0	0	0	0	0	0
1249	1	11120	111190000	111200000	0	0	0	0	0	0	0	0	0	0	0	0	0	0	0	0	0	0	0	0	0	0	0	0	0	0	0	0	0	0	0	0	0	0	0	0	0	0	0	0	0	0	0	0	0
1250	1	11121	111200000	111210000	0	0	0	0	0	0	0	0	0	0	0	0	0	0	0	0	0	0	0	0	0	0	0	0	0	0	0	0	0	0	0	0	0	0	0	0	0	0	0	0	0	0	0	0	0
1251	1	11122	111210000	111220000	0	0	0	0	0	0	0	0	0	0	0	0	0	0	0	0	0	0	0	0	0	0	0	0	0	0	0	0	0	0	0	0	0	0	0	0	0	0	0	0	0	0	0	0	0
1252	1	11123	111220000	111230000	0	0	0	0	0	0	0	0	0	0	0	0	0	0	0	0	0	0	0	0	0	0	0	0	0	0	0	0	0	0	0	0	0	0	0	0	0	0	0	0	0	0	0	0	0
1253	1	11124	111230000	111240000	0	0	0	0	0	0	0	0	0	0	0	0	0	0	0	0	0	0	0	0	0	0	0	0	0	0	0	0	0	0	0	0	0	0	0	0	0	0	0	0	0	0	0	0	0
1254	1	11125	111240000	111250000	0	0	0	4	0	0	0	0	0	0	0	0	0	2.08447e-05	0	0	0	0	0	0	0	0	0	0	0	0	0	0	0	5.42299e-06	5.42299e-06	0	0	0	0	0	0	0	0	0	0	0	0	0	0
1255	1	11126	111250000	111260000	0	0	0	0	0	0	0	1	0	0	0	0	0	0	0	0	0	2.0859e-05	0	0	0	0	0	0	0	3.59838e-06	0	0	0	0	3.59838e-06	0	0	0	0	0	0	0	0	0	0	0	0	0	0
1256	1	11127	111260000	111270000	0	0	0	1	0	0	0	0	0	0	0	0	0	5.21118e-06	0	0	0	0	0	0	0	0	0	0	0	0	0	0	0	1.35575e-06	1.35575e-06	0	0	0	0	0	0	0	0	0	0	0	0	0	0
1257	1	11128	111270000	111280000	0	0	0	2	0	0	0	0	0	0	0	0	0	1.04224e-05	0	0	0	0	0	0	0	0	0	0	0	0	0	0	0	2.7115e-06	2.7115e-06	0	0	0	0	0	0	0	0	0	0	0	0	0	0
1258	1	11129	111280000	111290000	0	0	0	0	0	0	0	0	0	0	0	0	0	0	0	0	0	0	0	0	0	0	0	0	0	0	0	0	0	0	0	0	0	0	0	0	0	0	0	0	0	0	0	0	0
1259	1	1113	11120000	11130000	0	0	0	0	0	0	1	0	0	0	0	0	0	0	0	0	1.16649e-05	0	0	0	0	0	0	0	0	0	0	0	6.11658e-07	0	6.11658e-07	0	0	0	0	0	0	0	0	0	0	0	0	0	0
1260	1	11130	111290000	111300000	0	0	0	0	0	0	1	0	0	0	0	0	0	0	0	0	1.16649e-05	0	0	0	0	0	0	0	0	0	0	0	6.11658e-07	0	6.11658e-07	0	0	0	0	0	0	0	0	0	0	0	0	0	0
1261	1	11131	111300000	111310000	0	0	0	0	0	0	0	0	0	0	0	0	0	0	0	0	0	0	0	0	0	0	0	0	0	0	0	0	0	0	0	0	0	0	0	0	0	0	0	0	0	0	0	0	0
1262	1	11132	111310000	111320000	0	0	0	0	0	0	0	0	0	0	0	0	0	0	0	0	0	0	0	0	0	0	0	0	0	0	0	0	0	0	0	0	0	0	0	0	0	0	0	0	0	0	0	0	0
1263	1	11133	111320000	111330000	0	0	0	0	0	0	0	10	0	0	0	0	0	0	0	0	0	0.00020859	0	0	0	0	0	0	0	3.59838e-05	0	0	0	0	3.59838e-05	0	0	0	0	0	0	0	0	0	0	0	0	0	0
1264	1	11134	111330000	111340000	0	0	0	1	0	0	0	0	0	0	0	0	0	5.21118e-06	0	0	0	0	0	0	0	0	0	0	0	0	0	0	0	1.35575e-06	1.35575e-06	0	0	0	0	0	0	0	0	0	0	0	0	0	0
1265	1	11135	111340000	111350000	0	0	0	2	0	0	0	0	0	0	0	0	0	1.04224e-05	0	0	0	0	0	0	0	0	0	0	0	0	0	0	0	2.7115e-06	2.7115e-06	0	0	0	0	0	0	0	0	0	0	0	0	0	0
1266	1	11136	111350000	111360000	0	0	0	0	0	0	0	0	0	0	0	0	0	0	0	0	0	0	0	0	0	0	0	0	0	0	0	0	0	0	0	0	0	0	0	0	0	0	0	0	0	0	0	0	0
1267	1	11137	111360000	111370000	0	0	0	0	0	0	0	0	0	0	0	0	0	0	0	0	0	0	0	0	0	0	0	0	0	0	0	0	0	0	0	0	0	0	0	0	0	0	0	0	0	0	0	0	0
1268	1	11138	111370000	111380000	0	0	0	0	0	0	0	0	1	0	0	0	0	0	0	0	0	0	1.82652e-05	0	0	0	0	0	0	0	6.57388e-07	0	0	0	6.57388e-07	0	0	0	0	0	0	0	0	0	0	0	0	0	0
1269	1	11139	111380000	111390000	0	0	0	0	0	3	0	0	0	0	0	0	0	0	0	4.19035e-05	0	0	0	0	0	0	0	0	0	0	0	1.55367e-06	0	0	1.55367e-06	0	0	0	0	0	0	0	0	0	0	0	0	0	0
1270	1	1114	11130000	11140000	0	0	0	3	0	0	0	0	0	0	0	0	0	1.56335e-05	0	0	0	0	0	0	0	0	0	0	0	0	0	0	0	4.06725e-06	4.06725e-06	0	0	0	0	0	0	0	0	0	0	0	0	0	0
1271	1	11140	111390000	111400000	0	0	0	0	0	0	0	0	1	0	0	0	0	0	0	0	0	0	1.82652e-05	0	0	0	0	0	0	0	6.57388e-07	0	0	0	6.57388e-07	0	0	0	0	0	0	0	0	0	0	0	0	0	0
1272	1	11141	111400000	111410000	0	0	0	0	0	0	0	0	0	0	0	0	0	0	0	0	0	0	0	0	0	0	0	0	0	0	0	0	0	0	0	0	0	0	0	0	0	0	0	0	0	0	0	0	0
1273	1	11142	111410000	111420000	0	0	0	2	0	0	0	0	0	0	0	0	0	1.04224e-05	0	0	0	0	0	0	0	0	0	0	0	0	0	0	0	2.7115e-06	2.7115e-06	0	0	0	0	0	0	0	0	0	0	0	0	0	0
1274	1	11143	111420000	111430000	0	0	0	1	0	0	0	0	0	0	0	0	0	5.21118e-06	0	0	0	0	0	0	0	0	0	0	0	0	0	0	0	1.35575e-06	1.35575e-06	0	0	0	0	0	0	0	0	0	0	0	0	0	0
1275	1	11144	111430000	111440000	0	0	0	1	0	0	0	0	0	0	0	0	0	5.21118e-06	0	0	0	0	0	0	0	0	0	0	0	0	0	0	0	1.35575e-06	1.35575e-06	0	0	0	0	0	0	0	0	0	0	0	0	0	0
1276	1	11145	111440000	111450000	0	0	0	0	0	0	0	0	0	0	0	0	0	0	0	0	0	0	0	0	0	0	0	0	0	0	0	0	0	0	0	0	0	0	0	0	0	0	0	0	0	0	0	0	0
1277	1	11146	111450000	111460000	0	0	0	1	0	1	0	0	0	0	0	0	0	5.21118e-06	0	1.39678e-05	0	0	0	0	0	0	0	0	0	0	0	5.17889e-07	0	1.35575e-06	1.87364e-06	0	0	0	0	0	0	0	0	0	0	0	0	0	0
1278	1	11147	111460000	111470000	0	0	0	0	0	0	0	1	0	0	0	0	0	0	0	0	0	2.0859e-05	0	0	0	0	0	0	0	3.59838e-06	0	0	0	0	3.59838e-06	0	0	0	0	0	0	0	0	0	0	0	0	0	0
1279	1	11148	111470000	111480000	0	0	0	1	0	0	0	0	0	0	0	0	0	5.21118e-06	0	0	0	0	0	0	0	0	0	0	0	0	0	0	0	1.35575e-06	1.35575e-06	0	0	0	0	0	0	0	0	0	0	0	0	0	0
1280	1	11149	111480000	111490000	0	0	0	2	0	0	0	0	1	0	0	0	0	1.04224e-05	0	0	0	0	1.82652e-05	0	0	0	0	0	0	0	6.57388e-07	0	0	2.7115e-06	3.36888e-06	0	0	0	0	0	0	0	0	0	0	0	0	0	0
1281	1	1115	11140000	11150000	0	0	0	2	0	0	0	0	0	0	0	0	0	1.04224e-05	0	0	0	0	0	0	0	0	0	0	0	0	0	0	0	2.7115e-06	2.7115e-06	0	0	0	0	0	0	0	0	0	0	0	0	0	0
1282	1	11150	111490000	111500000	0	0	0	0	0	0	0	0	0	0	0	0	0	0	0	0	0	0	0	0	0	0	0	0	0	0	0	0	0	0	0	0	0	0	0	0	0	0	0	0	0	0	0	0	0
1283	1	11151	111500000	111510000	0	0	0	0	0	0	0	0	0	0	0	0	0	0	0	0	0	0	0	0	0	0	0	0	0	0	0	0	0	0	0	0	0	0	0	0	0	0	0	0	0	0	0	0	0
1284	1	11152	111510000	111520000	0	0	0	2	0	0	0	0	0	0	0	0	0	1.04224e-05	0	0	0	0	0	0	0	0	0	0	0	0	0	0	0	2.7115e-06	2.7115e-06	0	0	0	0	0	0	0	0	0	0	0	0	0	0
1285	1	11153	111520000	111530000	0	0	0	1	0	0	0	0	0	0	0	0	0	5.21118e-06	0	0	0	0	0	0	0	0	0	0	0	0	0	0	0	1.35575e-06	1.35575e-06	0	0	0	0	0	0	0	0	0	0	0	0	0	0
1286	1	11154	111530000	111540000	0	0	0	0	0	0	0	0	0	0	0	0	0	0	0	0	0	0	0	0	0	0	0	0	0	0	0	0	0	0	0	0	0	0	0	0	0	0	0	0	0	0	0	0	0
1287	1	11155	111540000	111550000	0	0	0	0	0	0	0	0	0	0	0	0	0	0	0	0	0	0	0	0	0	0	0	0	0	0	0	0	0	0	0	0	0	0	0	0	0	0	0	0	0	0	0	0	0
1288	1	11156	111550000	111560000	0	0	0	0	0	0	0	0	0	0	0	0	0	0	0	0	0	0	0	0	0	0	0	0	0	0	0	0	0	0	0	0	0	0	0	0	0	0	0	0	0	0	0	0	0
1289	1	11157	111560000	111570000	0	0	0	0	0	0	0	0	0	0	0	0	0	0	0	0	0	0	0	0	0	0	0	0	0	0	0	0	0	0	0	0	0	0	0	0	0	0	0	0	0	0	0	0	0
1290	1	11158	111570000	111580000	0	0	0	0	0	0	0	0	0	0	0	0	0	0	0	0	0	0	0	0	0	0	0	0	0	0	0	0	0	0	0	0	0	0	0	0	0	0	0	0	0	0	0	0	0
1291	1	11159	111580000	111590000	0	0	0	0	0	0	0	0	0	0	0	0	0	0	0	0	0	0	0	0	0	0	0	0	0	0	0	0	0	0	0	0	0	0	0	0	0	0	0	0	0	0	0	0	0
1292	1	1116	11150000	11160000	0	0	0	0	0	1	0	0	3	0	0	0	0	0	0	1.39678e-05	0	0	5.47955e-05	0	0	0	0	0	0	0	1.97216e-06	5.17889e-07	0	0	2.49005e-06	0	0	0	0	0	0	0	0	0	0	0	0	0	0
1293	1	11160	111590000	111600000	0	0	0	2	0	0	0	0	0	0	0	0	0	1.04224e-05	0	0	0	0	0	0	0	0	0	0	0	0	0	0	0	2.7115e-06	2.7115e-06	0	0	0	0	0	0	0	0	0	0	0	0	0	0
1294	1	11161	111600000	111610000	0	0	0	0	0	0	0	1	0	0	0	0	0	0	0	0	0	2.0859e-05	0	0	0	0	0	0	0	3.59838e-06	0	0	0	0	3.59838e-06	0	0	0	0	0	0	0	0	0	0	0	0	0	0
1295	1	11162	111610000	111620000	0	0	0	0	0	0	0	0	0	0	0	0	0	0	0	0	0	0	0	0	0	0	0	0	0	0	0	0	0	0	0	0	0	0	0	0	0	0	0	0	0	0	0	0	0
1296	1	11163	111620000	111630000	0	0	0	0	0	0	0	0	0	0	0	0	0	0	0	0	0	0	0	0	0	0	0	0	0	0	0	0	0	0	0	0	0	0	0	0	0	0	0	0	0	0	0	0	0
1297	1	11164	111630000	111640000	0	0	0	0	0	0	0	0	0	0	0	0	0	0	0	0	0	0	0	0	0	0	0	0	0	0	0	0	0	0	0	0	0	0	0	0	0	0	0	0	0	0	0	0	0
1298	1	11165	111640000	111650000	0	0	0	1	0	0	0	0	0	0	0	0	0	5.21118e-06	0	0	0	0	0	0	0	0	0	0	0	0	0	0	0	1.35575e-06	1.35575e-06	0	0	0	0	0	0	0	0	0	0	0	0	0	0
1299	1	11166	111650000	111660000	0	0	0	2	0	2	0	0	0	0	0	0	0	1.04224e-05	0	2.79357e-05	0	0	0	0	0	0	0	0	0	0	0	1.03578e-06	0	2.7115e-06	3.74728e-06	0	0	0	0	0	0	0	0	0	0	0	0	0	0
1300	1	11167	111660000	111670000	0	0	0	4	0	0	1	0	0	0	0	0	0	2.08447e-05	0	0	1.16649e-05	0	0	0	0	0	0	0	0	0	0	0	6.11658e-07	5.42299e-06	6.03465e-06	0	0	0	0	0	0	0	0	0	0	0	0	0	0
1301	1	11168	111670000	111680000	0	0	0	2	0	0	2	0	0	0	0	0	0	1.04224e-05	0	0	2.33299e-05	0	0	0	0	0	0	0	0	0	0	0	1.22332e-06	2.7115e-06	3.93481e-06	0	0	0	0	0	0	0	0	0	0	0	0	0	0
1302	1	11169	111680000	111690000	0	0	0	1	0	0	0	0	1	0	0	0	0	5.21118e-06	0	0	0	0	1.82652e-05	0	0	0	0	0	0	0	6.57388e-07	0	0	1.35575e-06	2.01314e-06	0	0	0	0	0	0	0	0	0	0	0	0	0	0
1303	1	1117	11160000	11170000	0	0	0	0	0	0	0	0	0	0	0	0	0	0	0	0	0	0	0	0	0	0	0	0	0	0	0	0	0	0	0	0	0	0	0	0	0	0	0	0	0	0	0	0	0
1304	1	11170	111690000	111700000	0	0	0	2	0	0	0	0	0	0	0	0	0	1.04224e-05	0	0	0	0	0	0	0	0	0	0	0	0	0	0	0	2.7115e-06	2.7115e-06	0	0	0	0	0	0	0	0	0	0	0	0	0	0
1305	1	11171	111700000	111710000	0	0	0	1	0	0	0	0	0	0	0	0	0	5.21118e-06	0	0	0	0	0	0	0	0	0	0	0	0	0	0	0	1.35575e-06	1.35575e-06	0	0	0	0	0	0	0	0	0	0	0	0	0	0
1306	1	11172	111710000	111720000	0	0	0	0	0	1	0	0	0	0	0	0	0	0	0	1.39678e-05	0	0	0	0	0	0	0	0	0	0	0	5.17889e-07	0	0	5.17889e-07	0	0	0	0	0	0	0	0	0	0	0	0	0	0
1307	1	11173	111720000	111730000	0	0	0	0	0	0	0	0	0	0	0	0	0	0	0	0	0	0	0	0	0	0	0	0	0	0	0	0	0	0	0	0	0	0	0	0	0	0	0	0	0	0	0	0	0
1308	1	11174	111730000	111740000	0	0	0	1	0	0	0	0	0	0	0	0	0	5.21118e-06	0	0	0	0	0	0	0	0	0	0	0	0	0	0	0	1.35575e-06	1.35575e-06	0	0	0	0	0	0	0	0	0	0	0	0	0	0
1309	1	11175	111740000	111750000	0	0	0	0	0	0	0	0	1	0	0	0	0	0	0	0	0	0	1.82652e-05	0	0	0	0	0	0	0	6.57388e-07	0	0	0	6.57388e-07	0	0	0	0	0	0	0	0	0	0	0	0	0	0
1310	1	11176	111750000	111760000	0	0	0	0	0	0	0	0	0	0	0	0	0	0	0	0	0	0	0	0	0	0	0	0	0	0	0	0	0	0	0	0	0	0	0	0	0	0	0	0	0	0	0	0	0
1311	1	11177	111760000	111770000	0	0	0	0	0	1	0	0	0	0	0	0	0	0	0	1.39678e-05	0	0	0	0	0	0	0	0	0	0	0	5.17889e-07	0	0	5.17889e-07	0	0	0	0	0	0	0	0	0	0	0	0	0	0
1312	1	11178	111770000	111780000	0	0	0	0	0	1	1	0	0	0	0	0	0	0	0	1.39678e-05	1.16649e-05	0	0	0	0	0	0	0	0	0	0	5.17889e-07	6.11658e-07	0	1.12955e-06	0	0	0	0	0	0	0	0	0	0	0	0	0	0
1313	1	11179	111780000	111790000	0	0	0	0	0	0	0	0	0	0	0	0	0	0	0	0	0	0	0	0	0	0	0	0	0	0	0	0	0	0	0	0	0	0	0	0	0	0	0	0	0	0	0	0	0
1314	1	1118	11170000	11180000	0	0	0	0	0	7	0	0	0	0	0	0	0	0	0	9.77749e-05	0	0	0	0	0	0	0	0	0	0	0	3.62523e-06	0	0	3.62523e-06	0	0	0	0	0	1	0	0	0	0	0	0	0	0
1315	1	11180	111790000	111800000	0	0	0	0	0	0	0	0	0	0	0	0	0	0	0	0	0	0	0	0	0	0	0	0	0	0	0	0	0	0	0	0	0	0	0	0	0	0	0	0	0	0	0	0	0
1316	1	11181	111800000	111810000	0	0	0	0	0	0	0	0	1	0	0	0	0	0	0	0	0	0	1.82652e-05	0	0	0	0	0	0	0	6.57388e-07	0	0	0	6.57388e-07	0	0	0	0	0	0	0	0	0	0	0	0	0	0
1317	1	11182	111810000	111820000	0	0	0	0	0	0	0	0	0	0	0	0	0	0	0	0	0	0	0	0	0	0	0	0	0	0	0	0	0	0	0	0	0	0	0	0	0	0	0	0	0	0	0	0	0
1318	1	11183	111820000	111830000	0	0	0	0	0	0	0	1	0	0	0	0	0	0	0	0	0	2.0859e-05	0	0	0	0	0	0	0	3.59838e-06	0	0	0	0	3.59838e-06	0	0	0	0	0	0	0	0	0	0	0	0	0	0
1319	1	11184	111830000	111840000	0	0	0	1	0	0	0	0	0	0	0	0	0	5.21118e-06	0	0	0	0	0	0	0	0	0	0	0	0	0	0	0	1.35575e-06	1.35575e-06	0	0	0	0	0	0	0	0	0	0	0	0	0	0
1320	1	11185	111840000	111850000	0	0	0	0	0	0	0	0	0	0	0	0	0	0	0	0	0	0	0	0	0	0	0	0	0	0	0	0	0	0	0	0	0	0	0	0	0	0	0	0	0	0	0	0	0
1321	1	11186	111850000	111860000	0	0	0	1	0	0	1	0	0	0	0	0	0	5.21118e-06	0	0	1.16649e-05	0	0	0	0	0	0	0	0	0	0	0	6.11658e-07	1.35575e-06	1.96741e-06	0	0	0	0	0	0	0	0	0	0	0	0	0	0
1322	1	11187	111860000	111870000	0	0	0	0	0	0	1	0	0	0	0	0	0	0	0	0	1.16649e-05	0	0	0	0	0	0	0	0	0	0	0	6.11658e-07	0	6.11658e-07	0	0	0	0	0	0	0	0	0	0	0	0	0	0
1323	1	11188	111870000	111880000	0	0	0	0	0	0	0	0	0	0	0	0	0	0	0	0	0	0	0	0	0	0	0	0	0	0	0	0	0	0	0	0	0	0	0	0	0	0	0	0	0	0	0	0	0
1324	1	11189	111880000	111890000	0	0	0	0	0	0	1	0	1	0	0	0	0	0	0	0	1.16649e-05	0	1.82652e-05	0	0	0	0	0	0	0	6.57388e-07	0	6.11658e-07	0	1.26905e-06	0	0	0	0	0	0	0	0	0	0	0	0	0	0
1325	1	1119	11180000	11190000	0	0	0	0	0	0	0	0	0	0	0	0	0	0	0	0	0	0	0	0	0	0	0	0	0	0	0	0	0	0	0	0	0	0	0	0	0	0	0	0	0	0	0	0	0
1326	1	11190	111890000	111900000	0	0	0	1	0	6	2	0	0	0	0	0	0	5.21118e-06	0	8.38071e-05	2.33299e-05	0	0	0	0	0	0	0	0	0	0	3.10734e-06	1.22332e-06	1.35575e-06	5.6864e-06	0	0	0	0	0	0	0	0	0	0	0	0	0	0
1327	1	11191	111900000	111910000	0	0	0	1	0	0	1	0	0	0	0	0	0	5.21118e-06	0	0	1.16649e-05	0	0	0	0	0	0	0	0	0	0	0	6.11658e-07	1.35575e-06	1.96741e-06	0	0	0	0	0	0	0	0	0	0	0	0	0	0
1328	1	11192	111910000	111920000	0	0	0	0	0	0	0	0	0	0	0	0	0	0	0	0	0	0	0	0	0	0	0	0	0	0	0	0	0	0	0	0	0	0	0	0	0	0	0	0	0	0	0	0	0
1329	1	11193	111920000	111930000	0	0	0	0	0	0	0	0	0	0	0	0	0	0	0	0	0	0	0	0	0	0	0	0	0	0	0	0	0	0	0	0	0	0	0	0	0	0	0	0	0	0	0	0	0
1330	1	11194	111930000	111940000	0	0	0	0	0	0	0	0	0	0	0	0	0	0	0	0	0	0	0	0	0	0	0	0	0	0	0	0	0	0	0	0	0	0	0	0	0	0	0	0	0	0	0	0	0
1331	1	11195	111940000	111950000	0	0	0	0	0	2	0	0	0	0	0	0	0	0	0	2.79357e-05	0	0	0	0	0	0	0	0	0	0	0	1.03578e-06	0	0	1.03578e-06	0	0	0	0	0	0	0	0	0	0	0	0	0	0
1332	1	11196	111950000	111960000	0	2	0	0	0	2	0	0	0	0	0	0.000785546	0	0	0	2.79357e-05	0	0	0	0	0	0	5.36209e-06	0	0	0	0	1.03578e-06	0	0	6.39787e-06	0	0	0	0	0	0	0	0	0	0	0	0	0	0
1333	1	11197	111960000	111970000	0	0	0	1	0	0	0	0	0	0	0	0	0	5.21118e-06	0	0	0	0	0	0	0	0	0	0	0	0	0	0	0	1.35575e-06	1.35575e-06	0	0	0	0	0	0	0	0	0	0	0	0	0	0
1334	1	11198	111970000	111980000	0	0	0	0	0	0	0	0	0	0	0	0	0	0	0	0	0	0	0	0	0	0	0	0	0	0	0	0	0	0	0	0	0	0	0	0	0	0	0	0	0	0	0	0	0
1335	1	11199	111980000	111990000	0	0	0	0	0	1	1	0	0	0	0	0	0	0	0	1.39678e-05	1.16649e-05	0	0	0	0	0	0	0	0	0	0	5.17889e-07	6.11658e-07	0	1.12955e-06	0	0	0	0	0	0	0	0	0	0	0	0	0	0
1336	1	112	1110000	1120000	0	0	0	2	1	0	1	0	2	0	0	0	0	1.04224e-05	4.48209e-05	0	1.16649e-05	0	3.65303e-05	0	0	0	0	0	5.43748e-06	0	1.31478e-06	0	6.11658e-07	2.7115e-06	1.00754e-05	0	0	0	0	0	0	0	0	0	0	0	0	0	0
1337	1	1120	11190000	11200000	0	0	0	1	0	0	0	0	0	0	0	0	0	5.21118e-06	0	0	0	0	0	0	0	0	0	0	0	0	0	0	0	1.35575e-06	1.35575e-06	0	0	0	0	0	0	0	0	0	0	0	0	0	0
1338	1	11200	111990000	112000000	0	0	0	2	0	0	0	0	0	0	0	0	0	1.04224e-05	0	0	0	0	0	0	0	0	0	0	0	0	0	0	0	2.7115e-06	2.7115e-06	0	0	0	0	0	0	0	0	0	0	0	0	0	0
1339	1	11201	112000000	112010000	0	0	0	2	0	0	0	1	0	0	0	0	0	1.04224e-05	0	0	0	2.0859e-05	0	0	0	0	0	0	0	3.59838e-06	0	0	0	2.7115e-06	6.30988e-06	0	0	0	0	0	0	0	0	0	0	0	0	0	0
1340	1	11202	112010000	112020000	0	0	0	0	0	0	0	1	0	0	0	0	0	0	0	0	0	2.0859e-05	0	0	0	0	0	0	0	3.59838e-06	0	0	0	0	3.59838e-06	0	0	0	0	0	0	0	0	0	0	0	0	0	0
1341	1	11203	112020000	112030000	0	0	0	0	0	0	3	0	0	0	0	0	0	0	0	0	3.49948e-05	0	0	0	0	0	0	0	0	0	0	0	1.83497e-06	0	1.83497e-06	0	0	0	0	0	0	0	0	0	0	0	0	0	0
1342	1	11204	112030000	112040000	0	0	0	1	0	0	0	0	0	0	0	0	0	5.21118e-06	0	0	0	0	0	0	0	0	0	0	0	0	0	0	0	1.35575e-06	1.35575e-06	0	0	0	0	0	0	0	0	0	0	0	0	0	0
1343	1	11205	112040000	112050000	0	0	0	0	0	0	0	0	0	0	0	0	0	0	0	0	0	0	0	0	0	0	0	0	0	0	0	0	0	0	0	0	0	0	0	0	0	0	0	0	0	0	0	0	0
1344	1	11206	112050000	112060000	0	0	0	2	0	2	0	1	0	0	0	0	0	1.04224e-05	0	2.79357e-05	0	2.0859e-05	0	0	0	0	0	0	0	3.59838e-06	0	1.03578e-06	0	2.7115e-06	7.34566e-06	0	0	0	0	0	0	0	0	0	0	0	0	0	0
1345	1	11207	112060000	112070000	0	0	0	0	0	0	0	0	0	0	0	0	0	0	0	0	0	0	0	0	0	0	0	0	0	0	0	0	0	0	0	0	0	0	0	0	0	0	0	0	0	0	0	0	0
1346	1	11208	112070000	112080000	0	0	0	1	0	0	0	0	1	0	0	0	0	5.21118e-06	0	0	0	0	1.82652e-05	0	0	0	0	0	0	0	6.57388e-07	0	0	1.35575e-06	2.01314e-06	0	0	0	0	0	0	0	0	0	0	0	0	0	0
1347	1	11209	112080000	112090000	0	0	0	0	0	0	0	0	0	0	0	0	0	0	0	0	0	0	0	0	0	0	0	0	0	0	0	0	0	0	0	0	0	0	0	0	0	0	0	0	0	0	0	0	0
1348	1	1121	11200000	11210000	0	0	0	0	0	0	0	0	0	0	0	0	0	0	0	0	0	0	0	0	0	0	0	0	0	0	0	0	0	0	0	0	0	0	0	0	0	0	0	0	0	0	0	0	0
1349	1	11210	112090000	112100000	0	0	0	6	0	1	1	0	0	0	0	0	0	3.12671e-05	0	1.39678e-05	1.16649e-05	0	0	0	0	0	0	0	0	0	0	5.17889e-07	6.11658e-07	8.13449e-06	9.26404e-06	0	0	0	0	0	0	0	0	0	0	0	0	0	0
1350	1	11211	112100000	112110000	0	0	0	2	0	0	0	0	0	0	0	0	0	1.04224e-05	0	0	0	0	0	0	0	0	0	0	0	0	0	0	0	2.7115e-06	2.7115e-06	0	0	0	0	0	0	0	0	0	0	0	0	0	0
1351	1	11212	112110000	112120000	0	0	0	0	0	3	0	0	2	0	0	0	0	0	0	4.19035e-05	0	0	3.65303e-05	0	0	0	0	0	0	0	1.31478e-06	1.55367e-06	0	0	2.86844e-06	0	0	0	0	0	0	0	0	0	0	0	0	0	0
1352	1	11213	112120000	112130000	0	0	0	1	0	1	1	0	0	0	0	0	0	5.21118e-06	0	1.39678e-05	1.16649e-05	0	0	0	0	0	0	0	0	0	0	5.17889e-07	6.11658e-07	1.35575e-06	2.4853e-06	0	0	0	0	0	0	0	0	0	0	0	0	0	0
1353	1	11214	112130000	112140000	0	0	0	2	0	1	0	0	0	0	0	0	0	1.04224e-05	0	1.39678e-05	0	0	0	0	0	0	0	0	0	0	0	5.17889e-07	0	2.7115e-06	3.22939e-06	0	0	0	0	0	0	0	0	0	0	0	0	0	0
1354	1	11215	112140000	112150000	0	0	0	3	0	3	0	0	0	0	0	0	0	1.56335e-05	0	4.19035e-05	0	0	0	0	0	0	0	0	0	0	0	1.55367e-06	0	4.06725e-06	5.62091e-06	0	0	0	0	0	0	0	0	0	0	0	0	0	0
1355	1	11216	112150000	112160000	0	0	0	2	0	0	0	0	2	0	0	0	0	1.04224e-05	0	0	0	0	3.65303e-05	0	0	0	0	0	0	0	1.31478e-06	0	0	2.7115e-06	4.02627e-06	0	0	0	0	0	0	0	0	0	0	0	0	0	0
1356	1	11217	112160000	112170000	0	0	0	0	1	0	0	0	0	0	0	0	0	0	4.48209e-05	0	0	0	0	0	0	0	0	0	5.43748e-06	0	0	0	0	0	5.43748e-06	0	0	0	0	0	0	0	0	0	0	0	0	0	0
1357	1	11218	112170000	112180000	0	0	0	4	0	0	0	0	0	0	0	0	0	2.08447e-05	0	0	0	0	0	0	0	0	0	0	0	0	0	0	0	5.42299e-06	5.42299e-06	0	0	0	0	0	0	0	0	0	0	0	0	0	0
1358	1	11219	112180000	112190000	0	0	0	0	0	0	0	0	0	0	0	0	0	0	0	0	0	0	0	0	0	0	0	0	0	0	0	0	0	0	0	0	0	0	0	0	0	0	0	0	0	0	0	0	0
1359	1	1122	11210000	11220000	0	0	0	0	0	0	0	0	0	0	0	0	0	0	0	0	0	0	0	0	0	0	0	0	0	0	0	0	0	0	0	0	0	0	0	0	0	0	0	0	0	0	0	0	0
1360	1	11220	112190000	112200000	0	0	0	0	0	0	0	0	0	0	0	0	0	0	0	0	0	0	0	0	0	0	0	0	0	0	0	0	0	0	0	0	0	0	0	0	0	0	0	0	0	0	0	0	0
1361	1	11221	112200000	112210000	0	0	0	1	2	0	0	0	0	0	0	0	0	5.21118e-06	8.96419e-05	0	0	0	0	0	0	0	0	0	1.0875e-05	0	0	0	0	1.35575e-06	1.22307e-05	0	0	0	0	0	0	0	0	0	0	0	0	0	0
1362	1	11222	112210000	112220000	0	0	0	0	0	0	0	0	0	0	0	0	0	0	0	0	0	0	0	0	0	0	0	0	0	0	0	0	0	0	0	0	0	0	0	0	0	0	0	0	0	0	0	0	0
1363	1	11223	112220000	112230000	0	0	0	3	0	0	0	0	0	1	0	0	0	1.56335e-05	0	0	0	0	0	0.000147449	0	0	0	1.93976e-05	0	0	0	0	0	4.06725e-06	2.34648e-05	0	0	0	0	0	0	0	0	0	0	0	0	0	0
1364	1	11224	112230000	112240000	0	0	0	0	0	0	1	0	0	0	0	0	0	0	0	0	1.16649e-05	0	0	0	0	0	0	0	0	0	0	0	6.11658e-07	0	6.11658e-07	0	0	0	0	0	0	0	0	0	0	0	0	0	0
1365	1	11225	112240000	112250000	0	0	0	4	0	0	0	0	1	1	0	0	0	2.08447e-05	0	0	0	0	1.82652e-05	0.000147449	0	0	0	1.93976e-05	0	0	6.57388e-07	0	0	5.42299e-06	2.5478e-05	0	0	0	0	0	0	0	0	0	0	0	0	0	0
1366	1	11226	112250000	112260000	0	0	0	2	0	0	0	0	0	0	0	0	0	1.04224e-05	0	0	0	0	0	0	0	0	0	0	0	0	0	0	0	2.7115e-06	2.7115e-06	0	0	0	0	0	0	0	0	0	0	0	0	0	0
1367	1	11227	112260000	112270000	0	0	0	3	0	4	0	0	0	0	0	0	0	1.56335e-05	0	5.58714e-05	0	0	0	0	0	0	0	0	0	0	0	2.07156e-06	0	4.06725e-06	6.1388e-06	0	0	0	0	0	0	0	0	0	0	0	0	0	0
1368	1	11228	112270000	112280000	0	0	0	3	0	0	0	0	0	0	0	0	0	1.56335e-05	0	0	0	0	0	0	0	0	0	0	0	0	0	0	0	4.06725e-06	4.06725e-06	0	0	0	0	0	0	0	0	0	0	0	0	0	0
1369	1	11229	112280000	112290000	0	0	0	0	0	0	0	0	0	0	0	0	0	0	0	0	0	0	0	0	0	0	0	0	0	0	0	0	0	0	0	0	0	0	0	0	0	0	0	0	0	0	0	0	0
1370	1	1123	11220000	11230000	0	0	0	0	0	0	0	0	0	0	0	0	0	0	0	0	0	0	0	0	0	0	0	0	0	0	0	0	0	0	0	0	0	0	0	0	0	0	0	0	0	0	0	0	0
1371	1	11230	112290000	112300000	0	2	0	0	0	2	0	1	0	0	0	0.000785546	0	0	0	2.79357e-05	0	2.0859e-05	0	0	0	0	5.36209e-06	0	0	3.59838e-06	0	1.03578e-06	0	0	9.99625e-06	0	0	0	0	0	0	0	0	0	0	0	0	0	0
1372	1	11231	112300000	112310000	0	0	0	1	0	0	0	1	0	0	0	0	0	5.21118e-06	0	0	0	2.0859e-05	0	0	0	0	0	0	0	3.59838e-06	0	0	0	1.35575e-06	4.95413e-06	0	0	0	0	0	0	0	0	0	0	0	0	0	0
1373	1	11232	112310000	112320000	0	0	0	0	0	0	0	0	0	0	0	0	0	0	0	0	0	0	0	0	0	0	0	0	0	0	0	0	0	0	0	0	0	0	0	0	0	0	0	0	0	0	0	0	0
1374	1	11233	112320000	112330000	0	0	0	0	0	0	0	1	0	0	0	0	0	0	0	0	0	2.0859e-05	0	0	0	0	0	0	0	3.59838e-06	0	0	0	0	3.59838e-06	0	0	0	0	0	0	0	0	0	0	0	0	0	0
1375	1	11234	112330000	112340000	0	0	0	0	0	2	0	0	0	0	0	0	0	0	0	2.79357e-05	0	0	0	0	0	0	0	0	0	0	0	1.03578e-06	0	0	1.03578e-06	0	0	0	0	0	0	0	0	0	0	0	0	0	0
1376	1	11235	112340000	112350000	0	0	0	0	0	0	0	0	0	1	0	0	0	0	0	0	0	0	0	0.000147449	0	0	0	1.93976e-05	0	0	0	0	0	0	1.93976e-05	0	0	0	0	0	0	0	0	0	0	0	0	0	0
1377	1	11236	112350000	112360000	0	0	0	0	0	2	0	0	0	0	0	0	0	0	0	2.79357e-05	0	0	0	0	0	0	0	0	0	0	0	1.03578e-06	0	0	1.03578e-06	0	0	0	0	0	0	0	0	0	0	0	0	0	0
1378	1	11237	112360000	112370000	0	0	0	0	0	0	0	1	0	0	0	0	0	0	0	0	0	2.0859e-05	0	0	0	0	0	0	0	3.59838e-06	0	0	0	0	3.59838e-06	0	0	0	0	0	0	0	0	0	0	0	0	0	0
1379	1	11238	112370000	112380000	0	0	0	1	0	0	0	0	0	0	0	0	0	5.21118e-06	0	0	0	0	0	0	0	0	0	0	0	0	0	0	0	1.35575e-06	1.35575e-06	0	0	0	0	0	0	0	0	0	0	0	0	0	0
1380	1	11239	112380000	112390000	0	0	0	1	0	0	0	0	0	0	0	0	0	5.21118e-06	0	0	0	0	0	0	0	0	0	0	0	0	0	0	0	1.35575e-06	1.35575e-06	0	0	0	0	0	0	0	0	0	0	0	0	0	0
1381	1	1124	11230000	11240000	0	0	0	1	0	0	0	0	0	0	0	0	0	5.21118e-06	0	0	0	0	0	0	0	0	0	0	0	0	0	0	0	1.35575e-06	1.35575e-06	0	0	0	0	0	0	0	0	0	0	0	0	0	0
1382	1	11240	112390000	112400000	0	0	0	2	0	0	0	1	0	0	0	0	0	1.04224e-05	0	0	0	2.0859e-05	0	0	0	0	0	0	0	3.59838e-06	0	0	0	2.7115e-06	6.30988e-06	0	0	0	0	0	0	0	0	0	0	0	0	0	0
1383	1	11241	112400000	112410000	0	0	0	3	0	0	0	0	0	0	0	0	0	1.56335e-05	0	0	0	0	0	0	0	0	0	0	0	0	0	0	0	4.06725e-06	4.06725e-06	0	0	0	0	0	0	0	0	0	0	0	0	0	0
1384	1	11242	112410000	112420000	0	0	0	0	0	0	0	0	0	0	0	0	0	0	0	0	0	0	0	0	0	0	0	0	0	0	0	0	0	0	0	0	0	0	0	0	0	0	0	0	0	0	0	0	0
1385	1	11243	112420000	112430000	0	0	0	0	0	0	0	0	0	0	0	0	0	0	0	0	0	0	0	0	0	0	0	0	0	0	0	0	0	0	0	0	0	0	0	0	0	0	0	0	0	0	0	0	0
1386	1	11244	112430000	112440000	0	0	0	1	0	0	0	0	0	0	0	0	0	5.21118e-06	0	0	0	0	0	0	0	0	0	0	0	0	0	0	0	1.35575e-06	1.35575e-06	0	0	0	0	0	0	0	0	0	0	0	0	0	0
1387	1	11245	112440000	112450000	0	0	0	0	0	0	0	0	0	0	0	0	0	0	0	0	0	0	0	0	0	0	0	0	0	0	0	0	0	0	0	0	0	0	0	0	0	0	0	0	0	0	0	0	0
1388	1	11246	112450000	112460000	0	0	0	1	0	0	0	0	0	0	0	0	0	5.21118e-06	0	0	0	0	0	0	0	0	0	0	0	0	0	0	0	1.35575e-06	1.35575e-06	0	0	0	0	0	0	0	0	0	0	0	0	0	0
1389	1	11247	112460000	112470000	0	0	0	0	0	0	0	0	0	0	0	0	0	0	0	0	0	0	0	0	0	0	0	0	0	0	0	0	0	0	0	0	0	0	0	0	0	0	0	0	0	0	0	0	0
1390	1	11248	112470000	112480000	0	0	0	2	0	2	0	0	0	0	0	0	0	1.04224e-05	0	2.79357e-05	0	0	0	0	0	0	0	0	0	0	0	1.03578e-06	0	2.7115e-06	3.74728e-06	0	0	0	0	0	0	0	0	0	0	0	0	0	0
1391	1	11249	112480000	112490000	0	0	0	1	0	0	0	0	0	0	0	0	0	5.21118e-06	0	0	0	0	0	0	0	0	0	0	0	0	0	0	0	1.35575e-06	1.35575e-06	0	0	0	0	0	0	0	0	0	0	0	0	0	0
1392	1	1125	11240000	11250000	0	0	0	1	0	4	0	0	0	0	0	0	0	5.21118e-06	0	5.58714e-05	0	0	0	0	0	0	0	0	0	0	0	2.07156e-06	0	1.35575e-06	3.42731e-06	0	0	0	0	0	0	0	0	0	0	0	0	0	0
1393	1	11250	112490000	112500000	0	0	0	0	0	2	0	0	0	0	0	0	0	0	0	2.79357e-05	0	0	0	0	0	0	0	0	0	0	0	1.03578e-06	0	0	1.03578e-06	0	0	0	0	0	0	0	0	0	0	0	0	0	0
1394	1	11251	112500000	112510000	0	0	0	0	0	0	0	0	0	0	0	0	0	0	0	0	0	0	0	0	0	0	0	0	0	0	0	0	0	0	0	0	0	0	0	0	0	0	0	0	0	0	0	0	0
1395	1	11252	112510000	112520000	0	0	0	0	0	0	0	0	0	0	0	0	0	0	0	0	0	0	0	0	0	0	0	0	0	0	0	0	0	0	0	0	0	0	0	0	0	0	0	0	0	0	0	0	0
1396	1	11253	112520000	112530000	0	0	0	0	0	2	0	0	0	0	0	0	0	0	0	2.79357e-05	0	0	0	0	0	0	0	0	0	0	0	1.03578e-06	0	0	1.03578e-06	0	0	0	0	0	0	0	0	0	0	0	0	0	0
1397	1	11254	112530000	112540000	0	0	0	0	0	0	0	0	0	0	0	0	0	0	0	0	0	0	0	0	0	0	0	0	0	0	0	0	0	0	0	0	0	0	0	0	0	0	0	0	0	0	0	0	0
1398	1	11255	112540000	112550000	0	0	0	1	0	0	0	0	0	0	0	0	0	5.21118e-06	0	0	0	0	0	0	0	0	0	0	0	0	0	0	0	1.35575e-06	1.35575e-06	0	0	0	0	0	0	0	0	0	0	0	0	0	0
1399	1	11256	112550000	112560000	0	0	0	0	0	0	0	0	0	0	0	0	0	0	0	0	0	0	0	0	0	0	0	0	0	0	0	0	0	0	0	0	0	0	0	0	0	0	0	0	0	0	0	0	0
1400	1	11257	112560000	112570000	0	0	0	1	0	2	0	0	0	0	0	0	0	5.21118e-06	0	2.79357e-05	0	0	0	0	0	0	0	0	0	0	0	1.03578e-06	0	1.35575e-06	2.39153e-06	0	0	0	0	0	0	0	0	0	0	0	0	0	0
1401	1	11258	112570000	112580000	0	0	0	1	0	0	0	0	0	0	0	0	0	5.21118e-06	0	0	0	0	0	0	0	0	0	0	0	0	0	0	0	1.35575e-06	1.35575e-06	0	0	0	0	0	0	0	0	0	0	0	0	0	0
1402	1	11259	112580000	112590000	0	0	0	1	0	0	0	0	0	0	0	0	0	5.21118e-06	0	0	0	0	0	0	0	0	0	0	0	0	0	0	0	1.35575e-06	1.35575e-06	0	0	0	0	0	0	0	0	0	0	0	0	0	0
1403	1	1126	11250000	11260000	0	0	0	0	0	1	0	0	0	0	0	0	0	0	0	1.39678e-05	0	0	0	0	0	0	0	0	0	0	0	5.17889e-07	0	0	5.17889e-07	0	0	0	0	0	0	0	0	0	0	0	0	0	0
1404	1	11260	112590000	112600000	0	0	0	3	0	2	0	0	0	0	0	0	0	1.56335e-05	0	2.79357e-05	0	0	0	0	0	0	0	0	0	0	0	1.03578e-06	0	4.06725e-06	5.10302e-06	0	0	0	0	0	0	0	0	0	0	0	0	0	0
1405	1	11261	112600000	112610000	0	0	0	0	0	0	0	0	1	0	0	0	0	0	0	0	0	0	1.82652e-05	0	0	0	0	0	0	0	6.57388e-07	0	0	0	6.57388e-07	0	0	0	0	0	0	0	0	0	0	0	0	0	0
1406	1	11262	112610000	112620000	0	0	0	0	0	0	0	0	0	0	0	0	0	0	0	0	0	0	0	0	0	0	0	0	0	0	0	0	0	0	0	0	0	0	0	0	0	0	0	0	0	0	0	0	0
1407	1	11263	112620000	112630000	0	0	0	1	0	0	0	0	0	0	0	0	0	5.21118e-06	0	0	0	0	0	0	0	0	0	0	0	0	0	0	0	1.35575e-06	1.35575e-06	0	0	0	0	0	0	0	0	0	0	0	0	0	0
1408	1	11264	112630000	112640000	0	0	0	0	0	0	0	0	0	0	0	0	0	0	0	0	0	0	0	0	0	0	0	0	0	0	0	0	0	0	0	0	0	0	0	0	0	0	0	0	0	0	0	0	0
1409	1	11265	112640000	112650000	0	0	0	1	0	0	0	0	0	0	0	0	0	5.21118e-06	0	0	0	0	0	0	0	0	0	0	0	0	0	0	0	1.35575e-06	1.35575e-06	0	0	0	0	0	0	0	0	0	0	0	0	0	0
1410	1	11266	112650000	112660000	0	0	0	1	0	0	0	0	0	0	0	0	0	5.21118e-06	0	0	0	0	0	0	0	0	0	0	0	0	0	0	0	1.35575e-06	1.35575e-06	0	0	0	0	0	0	0	0	0	0	0	0	0	0
1411	1	11267	112660000	112670000	0	0	0	2	0	2	0	0	0	0	0	0	0	1.04224e-05	0	2.79357e-05	0	0	0	0	0	0	0	0	0	0	0	1.03578e-06	0	2.7115e-06	3.74728e-06	0	0	0	0	0	0	0	0	0	0	0	0	0	0
1412	1	11268	112670000	112680000	0	0	0	0	0	1	0	0	0	0	0	0	0	0	0	1.39678e-05	0	0	0	0	0	0	0	0	0	0	0	5.17889e-07	0	0	5.17889e-07	0	0	0	0	0	0	0	0	0	0	0	0	0	0
1413	1	11269	112680000	112690000	0	0	0	1	0	0	0	0	0	0	0	0	0	5.21118e-06	0	0	0	0	0	0	0	0	0	0	0	0	0	0	0	1.35575e-06	1.35575e-06	0	0	0	0	0	0	0	0	0	0	0	0	0	0
1414	1	1127	11260000	11270000	0	0	0	2	0	0	0	0	0	0	0	0	0	1.04224e-05	0	0	0	0	0	0	0	0	0	0	0	0	0	0	0	2.7115e-06	2.7115e-06	0	0	0	0	0	0	0	0	0	0	0	0	0	0
1415	1	11270	112690000	112700000	0	0	0	0	0	0	2	0	0	0	0	0	0	0	0	0	2.33299e-05	0	0	0	0	0	0	0	0	0	0	0	1.22332e-06	0	1.22332e-06	0	0	0	0	0	0	0	0	0	0	0	0	0	0
1416	1	11271	112700000	112710000	0	0	0	1	0	0	0	0	0	0	0	0	0	5.21118e-06	0	0	0	0	0	0	0	0	0	0	0	0	0	0	0	1.35575e-06	1.35575e-06	0	0	0	0	0	0	0	0	0	0	0	0	0	0
1417	1	11272	112710000	112720000	0	0	0	0	0	0	0	0	0	0	0	0	0	0	0	0	0	0	0	0	0	0	0	0	0	0	0	0	0	0	0	0	0	0	0	0	0	0	0	0	0	0	0	0	0
1418	1	11273	112720000	112730000	0	0	0	1	0	0	0	0	0	0	0	0	0	5.21118e-06	0	0	0	0	0	0	0	0	0	0	0	0	0	0	0	1.35575e-06	1.35575e-06	0	0	0	0	0	0	0	0	0	0	0	0	0	0
1419	1	11274	112730000	112740000	0	0	0	2	0	0	0	0	0	0	0	0	0	1.04224e-05	0	0	0	0	0	0	0	0	0	0	0	0	0	0	0	2.7115e-06	2.7115e-06	0	0	0	0	0	0	0	0	0	0	0	0	0	0
1420	1	11275	112740000	112750000	0	0	0	1	0	1	0	0	0	0	0	0	0	5.21118e-06	0	1.39678e-05	0	0	0	0	0	0	0	0	0	0	0	5.17889e-07	0	1.35575e-06	1.87364e-06	0	0	0	0	0	0	0	0	0	0	0	0	0	0
1421	1	11276	112750000	112760000	0	0	0	0	0	0	0	1	0	0	0	0	0	0	0	0	0	2.0859e-05	0	0	0	0	0	0	0	3.59838e-06	0	0	0	0	3.59838e-06	0	0	0	0	0	0	0	0	0	0	0	0	0	0
1422	1	11277	112760000	112770000	0	0	0	0	0	1	0	0	2	0	0	0	0	0	0	1.39678e-05	0	0	3.65303e-05	0	0	0	0	0	0	0	1.31478e-06	5.17889e-07	0	0	1.83266e-06	0	0	0	0	0	0	0	0	0	0	0	0	0	0
1423	1	11278	112770000	112780000	0	0	0	1	0	0	2	0	0	0	0	0	0	5.21118e-06	0	0	2.33299e-05	0	0	0	0	0	0	0	0	0	0	0	1.22332e-06	1.35575e-06	2.57906e-06	0	0	0	0	0	0	0	0	0	0	0	0	0	0
1424	1	11279	112780000	112790000	0	0	0	0	0	0	1	1	0	0	0	0	0	0	0	0	1.16649e-05	2.0859e-05	0	0	0	0	0	0	0	3.59838e-06	0	0	6.11658e-07	0	4.21004e-06	0	0	0	0	0	0	0	0	0	0	0	0	0	0
1425	1	1128	11270000	11280000	0	0	0	0	0	0	1	0	0	0	0	0	0	0	0	0	1.16649e-05	0	0	0	0	0	0	0	0	0	0	0	6.11658e-07	0	6.11658e-07	0	0	0	0	0	0	0	0	0	0	0	0	0	0
1426	1	11280	112790000	112800000	0	0	0	1	0	0	0	0	0	0	0	0	0	5.21118e-06	0	0	0	0	0	0	0	0	0	0	0	0	0	0	0	1.35575e-06	1.35575e-06	0	0	0	0	0	0	0	0	0	0	0	0	0	0
1427	1	11281	112800000	112810000	0	0	0	0	0	0	4	0	0	0	0	0	0	0	0	0	4.66597e-05	0	0	0	0	0	0	0	0	0	0	0	2.44663e-06	0	2.44663e-06	0	0	0	0	0	0	0	0	0	0	0	0	0	0
1428	1	11282	112810000	112820000	0	0	0	0	0	0	0	0	0	0	0	0	0	0	0	0	0	0	0	0	0	0	0	0	0	0	0	0	0	0	0	0	0	0	0	0	0	0	0	0	0	0	0	0	0
1429	1	11283	112820000	112830000	0	0	0	3	0	0	0	1	0	0	0	0	0	1.56335e-05	0	0	0	2.0859e-05	0	0	0	0	0	0	0	3.59838e-06	0	0	0	4.06725e-06	7.66563e-06	0	0	0	0	0	0	0	0	0	0	0	0	0	0
1430	1	11284	112830000	112840000	0	0	0	1	0	0	0	0	0	0	0	0	0	5.21118e-06	0	0	0	0	0	0	0	0	0	0	0	0	0	0	0	1.35575e-06	1.35575e-06	0	0	0	0	0	0	0	0	0	0	0	0	0	0
1431	1	11285	112840000	112850000	0	0	0	3	0	0	0	1	0	0	0	0	0	1.56335e-05	0	0	0	2.0859e-05	0	0	0	0	0	0	0	3.59838e-06	0	0	0	4.06725e-06	7.66563e-06	0	0	0	0	0	0	0	0	0	0	0	0	0	0
1432	1	11286	112850000	112860000	0	0	0	0	0	0	0	0	0	0	0	0	0	0	0	0	0	0	0	0	0	0	0	0	0	0	0	0	0	0	0	0	0	0	0	0	0	0	0	0	0	0	0	0	0
1433	1	11287	112860000	112870000	0	0	0	1	0	2	0	0	0	0	0	0	0	5.21118e-06	0	2.79357e-05	0	0	0	0	0	0	0	0	0	0	0	1.03578e-06	0	1.35575e-06	2.39153e-06	0	0	0	0	0	0	0	0	0	0	0	0	0	0
1434	1	11288	112870000	112880000	0	0	0	1	0	0	0	0	0	0	0	0	0	5.21118e-06	0	0	0	0	0	0	0	0	0	0	0	0	0	0	0	1.35575e-06	1.35575e-06	0	0	0	0	0	0	0	0	0	0	0	0	0	0
1435	1	11289	112880000	112890000	0	0	0	1	0	1	0	0	0	0	0	0	0	5.21118e-06	0	1.39678e-05	0	0	0	0	0	0	0	0	0	0	0	5.17889e-07	0	1.35575e-06	1.87364e-06	0	0	0	0	0	0	0	0	0	0	0	0	0	0
1436	1	1129	11280000	11290000	0	0	0	0	0	1	1	0	0	0	0	0	0	0	0	1.39678e-05	1.16649e-05	0	0	0	0	0	0	0	0	0	0	5.17889e-07	6.11658e-07	0	1.12955e-06	0	0	0	0	0	0	0	0	0	0	0	0	0	0
1437	1	11290	112890000	112900000	0	0	0	1	0	1	1	4	0	0	0	0	0	5.21118e-06	0	1.39678e-05	1.16649e-05	8.34359e-05	0	0	0	0	0	0	0	1.43935e-05	0	5.17889e-07	6.11658e-07	1.35575e-06	1.68788e-05	0	0	0	0	0	0	0	0	0	0	0	0	0	0
1438	1	11291	112900000	112910000	0	0	0	2	0	2	2	0	0	0	0	0	0	1.04224e-05	0	2.79357e-05	2.33299e-05	0	0	0	0	0	0	0	0	0	0	1.03578e-06	1.22332e-06	2.7115e-06	4.97059e-06	0	0	0	0	0	0	0	0	0	0	0	0	0	0
1439	1	11292	112910000	112920000	0	0	0	0	0	0	0	0	0	0	0	0	0	0	0	0	0	0	0	0	0	0	0	0	0	0	0	0	0	0	0	0	0	0	0	0	0	0	0	0	0	0	0	0	0
1440	1	11293	112920000	112930000	0	0	0	1	0	1	0	0	0	0	0	0	0	5.21118e-06	0	1.39678e-05	0	0	0	0	0	0	0	0	0	0	0	5.17889e-07	0	1.35575e-06	1.87364e-06	0	0	0	0	0	0	0	0	0	0	0	0	0	0
1441	1	11294	112930000	112940000	0	0	0	0	0	0	0	0	0	0	0	0	0	0	0	0	0	0	0	0	0	0	0	0	0	0	0	0	0	0	0	0	0	0	0	0	0	0	0	0	0	0	0	0	0
1442	1	11295	112940000	112950000	0	0	0	0	0	0	0	0	0	0	0	0	0	0	0	0	0	0	0	0	0	0	0	0	0	0	0	0	0	0	0	0	0	0	0	0	0	0	0	0	0	0	0	0	0
1443	1	11296	112950000	112960000	0	0	0	0	0	0	2	0	2	0	0	0	0	0	0	0	2.33299e-05	0	3.65303e-05	0	0	0	0	0	0	0	1.31478e-06	0	1.22332e-06	0	2.53809e-06	0	0	0	0	0	0	0	0	0	0	0	0	0	0
1444	1	11297	112960000	112970000	0	0	0	0	0	0	0	0	0	0	0	0	0	0	0	0	0	0	0	0	0	0	0	0	0	0	0	0	0	0	0	0	0	0	0	0	0	0	0	0	0	0	0	0	0
1445	1	11298	112970000	112980000	0	0	0	0	0	0	0	0	0	0	0	0	0	0	0	0	0	0	0	0	0	0	0	0	0	0	0	0	0	0	0	0	0	0	0	0	0	0	0	0	0	0	0	0	0
1446	1	11299	112980000	112990000	0	0	0	1	0	0	0	0	1	0	0	0	0	5.21118e-06	0	0	0	0	1.82652e-05	0	0	0	0	0	0	0	6.57388e-07	0	0	1.35575e-06	2.01314e-06	0	0	0	0	0	0	0	0	0	0	0	0	0	0
1447	1	113	1120000	1130000	0	0	0	1	0	2	0	0	4	0	0	0	0	5.21118e-06	0	2.79357e-05	0	0	7.30607e-05	0	0	0	0	0	0	0	2.62955e-06	1.03578e-06	0	1.35575e-06	5.02108e-06	0	0	0	0	0	0	0	0	0	0	0	0	0	0
1448	1	1130	11290000	11300000	0	0	0	0	0	2	0	0	0	0	0	0	0	0	0	2.79357e-05	0	0	0	0	0	0	0	0	0	0	0	1.03578e-06	0	0	1.03578e-06	0	0	0	0	0	0	0	0	0	0	0	0	0	0
1449	1	11300	112990000	113000000	0	0	0	1	0	0	0	0	0	0	0	0	0	5.21118e-06	0	0	0	0	0	0	0	0	0	0	0	0	0	0	0	1.35575e-06	1.35575e-06	0	0	0	0	0	0	0	0	0	0	0	0	0	0
1450	1	11301	113000000	113010000	0	0	0	2	0	0	0	0	0	0	0	0	0	1.04224e-05	0	0	0	0	0	0	0	0	0	0	0	0	0	0	0	2.7115e-06	2.7115e-06	0	0	0	0	0	0	0	0	0	0	0	0	0	0
1451	1	11302	113010000	113020000	0	0	0	0	0	0	0	0	2	0	0	0	0	0	0	0	0	0	3.65303e-05	0	0	0	0	0	0	0	1.31478e-06	0	0	0	1.31478e-06	0	0	0	0	0	0	0	0	0	0	0	0	0	0
1452	1	11303	113020000	113030000	0	0	0	0	0	0	0	0	0	0	0	0	0	0	0	0	0	0	0	0	0	0	0	0	0	0	0	0	0	0	0	0	0	0	0	0	0	0	0	0	0	0	0	0	0
1453	1	11304	113030000	113040000	0	0	0	0	0	0	0	0	0	0	0	0	0	0	0	0	0	0	0	0	0	0	0	0	0	0	0	0	0	0	0	0	0	0	0	0	0	0	0	0	0	0	0	0	0
1454	1	11305	113040000	113050000	0	0	0	1	0	0	0	0	0	0	0	0	0	5.21118e-06	0	0	0	0	0	0	0	0	0	0	0	0	0	0	0	1.35575e-06	1.35575e-06	0	0	0	0	0	0	0	0	0	0	0	0	0	0
1455	1	11306	113050000	113060000	0	0	0	0	0	0	0	0	0	0	0	0	0	0	0	0	0	0	0	0	0	0	0	0	0	0	0	0	0	0	0	0	0	0	0	0	0	0	0	0	0	0	0	0	0
1456	1	11307	113060000	113070000	0	0	0	0	0	0	1	0	0	0	0	0	0	0	0	0	1.16649e-05	0	0	0	0	0	0	0	0	0	0	0	6.11658e-07	0	6.11658e-07	0	0	0	0	0	0	0	0	0	0	0	0	0	0
1457	1	11308	113070000	113080000	0	0	0	2	0	0	0	0	0	0	0	0	0	1.04224e-05	0	0	0	0	0	0	0	0	0	0	0	0	0	0	0	2.7115e-06	2.7115e-06	0	0	0	0	0	0	0	0	0	0	0	0	0	0
1458	1	11309	113080000	113090000	0	0	0	1	0	0	0	0	0	0	0	0	0	5.21118e-06	0	0	0	0	0	0	0	0	0	0	0	0	0	0	0	1.35575e-06	1.35575e-06	0	0	0	0	0	0	0	0	0	0	0	0	0	0
1459	1	1131	11300000	11310000	0	0	0	0	0	0	0	0	0	0	0	0	0	0	0	0	0	0	0	0	0	0	0	0	0	0	0	0	0	0	0	0	0	0	0	0	0	0	0	0	0	0	0	0	0
1460	1	11310	113090000	113100000	0	0	0	0	0	0	0	0	0	0	0	0	0	0	0	0	0	0	0	0	0	0	0	0	0	0	0	0	0	0	0	0	0	0	0	0	0	0	0	0	0	0	0	0	0
1461	1	11311	113100000	113110000	0	0	0	0	0	0	0	0	0	0	0	0	0	0	0	0	0	0	0	0	0	0	0	0	0	0	0	0	0	0	0	0	0	0	0	0	0	0	0	0	0	0	0	0	0
1462	1	11312	113110000	113120000	0	0	0	5	0	0	0	0	0	0	0	0	0	2.60559e-05	0	0	0	0	0	0	0	0	0	0	0	0	0	0	0	6.77874e-06	6.77874e-06	0	0	0	0	0	0	0	0	0	0	0	0	0	0
1463	1	11313	113120000	113130000	0	0	0	5	0	0	0	0	0	0	0	0	0	2.60559e-05	0	0	0	0	0	0	0	0	0	0	0	0	0	0	0	6.77874e-06	6.77874e-06	0	0	0	0	0	0	0	0	0	0	0	0	0	0
1464	1	11314	113130000	113140000	0	0	0	0	0	0	0	0	0	0	0	0	0	0	0	0	0	0	0	0	0	0	0	0	0	0	0	0	0	0	0	0	0	0	0	0	0	0	0	0	0	0	0	0	0
1465	1	11315	113140000	113150000	0	0	0	0	0	0	2	0	0	0	0	0	0	0	0	0	2.33299e-05	0	0	0	0	0	0	0	0	0	0	0	1.22332e-06	0	1.22332e-06	0	0	0	0	0	0	0	0	0	0	0	0	0	0
1466	1	11316	113150000	113160000	0	0	0	0	0	0	2	0	0	0	0	0	0	0	0	0	2.33299e-05	0	0	0	0	0	0	0	0	0	0	0	1.22332e-06	0	1.22332e-06	0	0	0	0	0	0	0	0	0	0	0	0	0	0
1467	1	11317	113160000	113170000	0	0	0	1	0	0	4	0	0	0	0	0	0	5.21118e-06	0	0	4.66597e-05	0	0	0	0	0	0	0	0	0	0	0	2.44663e-06	1.35575e-06	3.80238e-06	0	0	0	0	0	0	0	0	0	0	0	0	0	0
1468	1	11318	113170000	113180000	0	0	0	0	0	1	0	0	0	0	0	0	0	0	0	1.39678e-05	0	0	0	0	0	0	0	0	0	0	0	5.17889e-07	0	0	5.17889e-07	0	0	0	0	0	0	0	0	0	0	0	0	0	0
1469	1	11319	113180000	113190000	0	0	0	1	0	2	0	0	0	0	0	0	0	5.21118e-06	0	2.79357e-05	0	0	0	0	0	0	0	0	0	0	0	1.03578e-06	0	1.35575e-06	2.39153e-06	0	0	0	0	0	0	0	0	0	0	0	0	0	0
1470	1	1132	11310000	11320000	0	0	0	0	0	1	0	0	0	0	0	0	0	0	0	1.39678e-05	0	0	0	0	0	0	0	0	0	0	0	5.17889e-07	0	0	5.17889e-07	0	0	0	0	0	0	0	0	0	0	0	0	0	0
1471	1	11320	113190000	113200000	0	0	0	3	0	2	0	0	0	0	0	0	0	1.56335e-05	0	2.79357e-05	0	0	0	0	0	0	0	0	0	0	0	1.03578e-06	0	4.06725e-06	5.10302e-06	0	0	0	0	0	0	0	0	0	0	0	0	0	0
1472	1	11321	113200000	113210000	0	0	0	0	0	0	0	0	0	0	0	0	0	0	0	0	0	0	0	0	0	0	0	0	0	0	0	0	0	0	0	0	0	0	0	0	0	0	0	0	0	0	0	0	0
1473	1	11322	113210000	113220000	0	0	0	0	0	1	0	0	0	0	0	0	0	0	0	1.39678e-05	0	0	0	0	0	0	0	0	0	0	0	5.17889e-07	0	0	5.17889e-07	0	0	0	0	0	0	0	0	0	0	0	0	0	0
1474	1	11323	113220000	113230000	0	0	0	0	0	3	0	0	0	0	0	0	0	0	0	4.19035e-05	0	0	0	0	0	0	0	0	0	0	0	1.55367e-06	0	0	1.55367e-06	0	0	0	0	0	0	0	0	0	0	0	0	0	0
1475	1	11324	113230000	113240000	0	0	0	2	0	0	0	0	0	0	0	0	0	1.04224e-05	0	0	0	0	0	0	0	0	0	0	0	0	0	0	0	2.7115e-06	2.7115e-06	0	0	0	0	0	0	0	0	0	0	0	0	0	0
1476	1	11325	113240000	113250000	0	0	0	1	0	3	0	0	0	0	0	0	0	5.21118e-06	0	4.19035e-05	0	0	0	0	0	0	0	0	0	0	0	1.55367e-06	0	1.35575e-06	2.90942e-06	0	0	0	0	0	0	0	0	0	0	0	0	0	0
1477	1	11326	113250000	113260000	0	0	0	2	0	2	0	0	0	0	0	0	0	1.04224e-05	0	2.79357e-05	0	0	0	0	0	0	0	0	0	0	0	1.03578e-06	0	2.7115e-06	3.74728e-06	0	0	0	0	0	0	0	0	0	0	0	0	0	0
1478	1	11327	113260000	113270000	0	0	0	0	0	0	0	0	0	0	0	0	0	0	0	0	0	0	0	0	0	0	0	0	0	0	0	0	0	0	0	0	0	0	0	0	0	0	0	0	0	0	0	0	0
1479	1	11328	113270000	113280000	0	0	0	2	0	0	0	0	0	0	0	0	0	1.04224e-05	0	0	0	0	0	0	0	0	0	0	0	0	0	0	0	2.7115e-06	2.7115e-06	0	0	0	0	0	0	0	0	0	0	0	0	0	0
1480	1	11329	113280000	113290000	0	0	0	0	0	0	1	0	0	0	0	0	0	0	0	0	1.16649e-05	0	0	0	0	0	0	0	0	0	0	0	6.11658e-07	0	6.11658e-07	0	0	0	0	0	0	0	0	0	0	0	0	0	0
1481	1	1133	11320000	11330000	0	0	0	1	0	0	0	0	0	0	0	0	0	5.21118e-06	0	0	0	0	0	0	0	0	0	0	0	0	0	0	0	1.35575e-06	1.35575e-06	0	0	0	0	0	0	0	0	0	0	0	0	0	0
1482	1	11330	113290000	113300000	0	0	0	2	0	0	0	0	0	0	0	0	0	1.04224e-05	0	0	0	0	0	0	0	0	0	0	0	0	0	0	0	2.7115e-06	2.7115e-06	0	0	0	0	0	0	0	0	0	0	0	0	0	0
1483	1	11331	113300000	113310000	0	0	0	5	0	0	0	0	0	0	0	0	0	2.60559e-05	0	0	0	0	0	0	0	0	0	0	0	0	0	0	0	6.77874e-06	6.77874e-06	0	0	0	0	0	0	0	0	0	0	0	0	0	0
1484	1	11332	113310000	113320000	0	0	0	0	0	0	0	0	0	0	0	0	0	0	0	0	0	0	0	0	0	0	0	0	0	0	0	0	0	0	0	0	0	0	0	0	0	0	0	0	0	0	0	0	0
1485	1	11333	113320000	113330000	0	0	0	0	0	0	0	0	0	0	0	0	0	0	0	0	0	0	0	0	0	0	0	0	0	0	0	0	0	0	0	0	0	0	0	0	0	0	0	0	0	0	0	0	0
1486	1	11334	113330000	113340000	0	0	0	0	0	0	0	0	0	0	0	0	0	0	0	0	0	0	0	0	0	0	0	0	0	0	0	0	0	0	0	0	0	0	0	0	0	0	0	0	0	0	0	0	0
1487	1	11335	113340000	113350000	0	0	0	0	0	0	0	0	0	0	0	0	0	0	0	0	0	0	0	0	0	0	0	0	0	0	0	0	0	0	0	0	0	0	0	0	0	0	0	0	0	0	0	0	0
1488	1	11336	113350000	113360000	0	0	0	3	0	0	1	0	0	0	0	0	0	1.56335e-05	0	0	1.16649e-05	0	0	0	0	0	0	0	0	0	0	0	6.11658e-07	4.06725e-06	4.6789e-06	0	0	0	0	0	0	0	0	0	0	0	0	0	0
1489	1	11337	113360000	113370000	0	0	0	2	0	0	0	0	0	0	0	0	0	1.04224e-05	0	0	0	0	0	0	0	0	0	0	0	0	0	0	0	2.7115e-06	2.7115e-06	0	0	0	0	0	0	0	0	0	0	0	0	0	0
1490	1	11338	113370000	113380000	0	0	0	1	0	1	0	0	0	0	0	0	0	5.21118e-06	0	1.39678e-05	0	0	0	0	0	0	0	0	0	0	0	5.17889e-07	0	1.35575e-06	1.87364e-06	0	0	0	0	0	0	0	0	0	0	0	0	0	0
1491	1	11339	113380000	113390000	0	0	0	0	0	0	0	0	0	0	0	0	0	0	0	0	0	0	0	0	0	0	0	0	0	0	0	0	0	0	0	0	0	0	0	0	0	0	0	0	0	0	0	0	0
1492	1	1134	11330000	11340000	0	0	0	1	0	0	0	0	0	0	0	0	0	5.21118e-06	0	0	0	0	0	0	0	0	0	0	0	0	0	0	0	1.35575e-06	1.35575e-06	0	0	0	0	0	0	0	0	0	0	0	0	0	0
1493	1	11340	113390000	113400000	0	0	0	0	0	0	0	0	0	0	0	0	0	0	0	0	0	0	0	0	0	0	0	0	0	0	0	0	0	0	0	0	0	0	0	0	0	0	0	0	0	0	0	0	0
1494	1	11341	113400000	113410000	0	0	0	0	0	0	0	0	0	0	0	0	0	0	0	0	0	0	0	0	0	0	0	0	0	0	0	0	0	0	0	0	0	0	0	0	0	0	0	0	0	0	0	0	0
1495	1	11342	113410000	113420000	0	0	0	0	0	0	0	0	0	0	0	0	0	0	0	0	0	0	0	0	0	0	0	0	0	0	0	0	0	0	0	0	0	0	0	0	0	0	0	0	0	0	0	0	0
1496	1	11343	113420000	113430000	0	0	0	0	0	0	1	0	0	0	0	0	0	0	0	0	1.16649e-05	0	0	0	0	0	0	0	0	0	0	0	6.11658e-07	0	6.11658e-07	0	0	0	0	0	0	0	0	0	0	0	0	0	0
1497	1	11344	113430000	113440000	0	0	0	0	0	0	0	0	0	0	0	0	0	0	0	0	0	0	0	0	0	0	0	0	0	0	0	0	0	0	0	0	0	0	0	0	0	0	0	0	0	0	0	0	0
1498	1	11345	113440000	113450000	0	0	0	1	0	1	1	0	0	0	0	0	0	5.21118e-06	0	1.39678e-05	1.16649e-05	0	0	0	0	0	0	0	0	0	0	5.17889e-07	6.11658e-07	1.35575e-06	2.4853e-06	0	0	0	0	0	0	0	0	0	0	0	0	0	0
1499	1	11346	113450000	113460000	0	0	0	0	1	0	1	0	0	0	0	0	0	0	4.48209e-05	0	1.16649e-05	0	0	0	0	0	0	0	5.43748e-06	0	0	0	6.11658e-07	0	6.04913e-06	0	0	0	0	0	0	0	0	0	0	0	0	0	0
1500	1	11347	113460000	113470000	0	0	0	2	0	0	0	0	0	0	0	0	0	1.04224e-05	0	0	0	0	0	0	0	0	0	0	0	0	0	0	0	2.7115e-06	2.7115e-06	0	0	0	0	0	0	0	0	0	0	0	0	0	0
1501	1	11348	113470000	113480000	0	0	0	6	0	0	0	0	0	0	0	0	0	3.12671e-05	0	0	0	0	0	0	0	0	0	0	0	0	0	0	0	8.13449e-06	8.13449e-06	0	0	0	0	0	0	0	0	0	0	0	0	0	0
1502	1	11349	113480000	113490000	0	0	0	1	0	0	0	0	0	0	0	0	0	5.21118e-06	0	0	0	0	0	0	0	0	0	0	0	0	0	0	0	1.35575e-06	1.35575e-06	0	0	0	0	0	0	0	0	0	0	0	0	0	0
1503	1	1135	11340000	11350000	0	0	0	0	0	0	0	0	1	0	0	0	0	0	0	0	0	0	1.82652e-05	0	0	0	0	0	0	0	6.57388e-07	0	0	0	6.57388e-07	0	0	0	0	0	0	0	0	0	0	0	0	0	0
1504	1	11350	113490000	113500000	0	0	0	0	0	0	0	0	0	0	0	0	0	0	0	0	0	0	0	0	0	0	0	0	0	0	0	0	0	0	0	0	0	0	0	0	0	0	0	0	0	0	0	0	0
1505	1	11351	113500000	113510000	0	0	0	1	0	0	0	0	0	0	0	0	0	5.21118e-06	0	0	0	0	0	0	0	0	0	0	0	0	0	0	0	1.35575e-06	1.35575e-06	0	0	0	0	0	0	0	0	0	0	0	0	0	0
1506	1	11352	113510000	113520000	0	0	0	1	0	0	0	0	0	0	0	0	0	5.21118e-06	0	0	0	0	0	0	0	0	0	0	0	0	0	0	0	1.35575e-06	1.35575e-06	0	0	0	0	0	0	0	0	0	0	0	0	0	0
1507	1	11353	113520000	113530000	0	0	0	0	0	0	1	0	0	0	0	0	0	0	0	0	1.16649e-05	0	0	0	0	0	0	0	0	0	0	0	6.11658e-07	0	6.11658e-07	0	0	0	0	0	0	0	0	0	0	0	0	0	0
1508	1	11354	113530000	113540000	0	0	0	0	1	0	0	0	0	0	0	0	0	0	4.48209e-05	0	0	0	0	0	0	0	0	0	5.43748e-06	0	0	0	0	0	5.43748e-06	0	0	0	0	0	0	0	0	0	0	0	0	0	0
1509	1	11355	113540000	113550000	0	0	0	1	0	0	0	0	0	0	0	0	0	5.21118e-06	0	0	0	0	0	0	0	0	0	0	0	0	0	0	0	1.35575e-06	1.35575e-06	0	0	0	0	0	0	0	0	0	0	0	0	0	0
1510	1	11356	113550000	113560000	0	0	0	1	0	0	0	0	0	0	0	0	0	5.21118e-06	0	0	0	0	0	0	0	0	0	0	0	0	0	0	0	1.35575e-06	1.35575e-06	0	0	0	0	0	0	0	0	0	0	0	0	0	0
1511	1	11357	113560000	113570000	0	0	0	1	0	0	0	0	1	0	0	0	0	5.21118e-06	0	0	0	0	1.82652e-05	0	0	0	0	0	0	0	6.57388e-07	0	0	1.35575e-06	2.01314e-06	0	0	0	0	0	0	0	0	0	0	0	0	0	0
1512	1	11358	113570000	113580000	0	0	0	2	0	0	0	0	0	0	0	0	0	1.04224e-05	0	0	0	0	0	0	0	0	0	0	0	0	0	0	0	2.7115e-06	2.7115e-06	0	0	0	0	0	0	0	0	0	0	0	0	0	0
1513	1	11359	113580000	113590000	0	0	0	1	0	0	0	5	0	0	0	0	0	5.21118e-06	0	0	0	0.000104295	0	0	0	0	0	0	0	1.79919e-05	0	0	0	1.35575e-06	1.93477e-05	0	0	0	0	0	0	0	0	0	0	0	0	0	0
1514	1	1136	11350000	11360000	0	0	0	0	0	0	0	0	0	0	0	0	0	0	0	0	0	0	0	0	0	0	0	0	0	0	0	0	0	0	0	0	0	0	0	0	0	0	0	0	0	0	0	0	0
1515	1	11360	113590000	113600000	0	0	0	0	0	2	0	0	0	0	0	0	0	0	0	2.79357e-05	0	0	0	0	0	0	0	0	0	0	0	1.03578e-06	0	0	1.03578e-06	0	0	0	0	0	0	0	0	0	0	0	0	0	0
1516	1	11361	113600000	113610000	0	0	0	0	0	0	0	0	0	0	0	0	0	0	0	0	0	0	0	0	0	0	0	0	0	0	0	0	0	0	0	0	0	0	0	0	0	0	0	0	0	0	0	0	0
1517	1	11362	113610000	113620000	0	0	0	0	0	0	1	0	0	0	0	0	0	0	0	0	1.16649e-05	0	0	0	0	0	0	0	0	0	0	0	6.11658e-07	0	6.11658e-07	0	0	0	0	0	0	0	0	0	0	0	0	0	0
1518	1	11363	113620000	113630000	0	0	0	1	0	1	0	0	0	0	0	0	0	5.21118e-06	0	1.39678e-05	0	0	0	0	0	0	0	0	0	0	0	5.17889e-07	0	1.35575e-06	1.87364e-06	0	0	0	0	0	0	0	0	0	0	0	0	0	0
1519	1	11364	113630000	113640000	0	0	0	0	0	0	0	0	0	0	0	0	0	0	0	0	0	0	0	0	0	0	0	0	0	0	0	0	0	0	0	0	0	0	0	0	0	0	0	0	0	0	0	0	0
1520	1	11365	113640000	113650000	0	0	0	0	0	1	0	0	0	0	0	0	0	0	0	1.39678e-05	0	0	0	0	0	0	0	0	0	0	0	5.17889e-07	0	0	5.17889e-07	0	0	0	0	0	0	0	0	0	0	0	0	0	0
1521	1	11366	113650000	113660000	0	0	0	1	0	0	0	0	0	0	0	0	0	5.21118e-06	0	0	0	0	0	0	0	0	0	0	0	0	0	0	0	1.35575e-06	1.35575e-06	0	0	0	0	0	0	0	0	0	0	0	0	0	0
1522	1	11367	113660000	113670000	0	0	0	0	0	0	0	0	0	0	0	0	0	0	0	0	0	0	0	0	0	0	0	0	0	0	0	0	0	0	0	0	0	0	0	0	0	0	0	0	0	0	0	0	0
1523	1	11368	113670000	113680000	0	0	0	2	0	0	0	0	0	0	0	0	0	1.04224e-05	0	0	0	0	0	0	0	0	0	0	0	0	0	0	0	2.7115e-06	2.7115e-06	0	0	0	0	0	0	0	0	0	0	0	0	0	0
1524	1	11369	113680000	113690000	0	0	0	0	0	0	0	0	0	0	0	0	0	0	0	0	0	0	0	0	0	0	0	0	0	0	0	0	0	0	0	0	0	0	0	0	0	0	0	0	0	0	0	0	0
1525	1	1137	11360000	11370000	0	0	0	1	0	3	0	0	0	0	0	0	0	5.21118e-06	0	4.19035e-05	0	0	0	0	0	0	0	0	0	0	0	1.55367e-06	0	1.35575e-06	2.90942e-06	0	0	0	0	0	0	0	0	0	0	0	0	0	0
1526	1	11370	113690000	113700000	0	0	0	0	0	0	0	0	0	0	0	0	0	0	0	0	0	0	0	0	0	0	0	0	0	0	0	0	0	0	0	0	0	0	0	0	0	0	0	0	0	0	0	0	0
1527	1	11371	113700000	113710000	0	0	0	0	2	0	0	0	0	0	0	0	0	0	8.96419e-05	0	0	0	0	0	0	0	0	0	1.0875e-05	0	0	0	0	0	1.0875e-05	0	0	0	0	0	0	0	0	0	0	0	0	0	0
1528	1	11372	113710000	113720000	0	0	0	1	0	0	0	0	0	0	0	0	0	5.21118e-06	0	0	0	0	0	0	0	0	0	0	0	0	0	0	0	1.35575e-06	1.35575e-06	0	0	0	0	0	0	0	0	0	0	0	0	0	0
1529	1	11373	113720000	113730000	0	0	0	2	0	0	0	0	0	0	0	0	0	1.04224e-05	0	0	0	0	0	0	0	0	0	0	0	0	0	0	0	2.7115e-06	2.7115e-06	0	0	0	0	0	0	0	0	0	0	0	0	0	0
1530	1	11374	113730000	113740000	0	0	0	0	0	0	0	0	0	0	0	0	0	0	0	0	0	0	0	0	0	0	0	0	0	0	0	0	0	0	0	0	0	0	0	0	0	0	0	0	0	0	0	0	0
1531	1	11375	113740000	113750000	0	0	0	1	0	0	0	0	0	0	0	0	0	5.21118e-06	0	0	0	0	0	0	0	0	0	0	0	0	0	0	0	1.35575e-06	1.35575e-06	0	0	0	0	0	0	0	0	0	0	0	0	0	0
1532	1	11376	113750000	113760000	0	0	0	2	0	0	0	0	0	0	0	0	0	1.04224e-05	0	0	0	0	0	0	0	0	0	0	0	0	0	0	0	2.7115e-06	2.7115e-06	0	0	0	0	0	0	0	0	0	0	0	0	0	0
1533	1	11377	113760000	113770000	0	0	0	0	0	0	0	0	0	0	0	0	0	0	0	0	0	0	0	0	0	0	0	0	0	0	0	0	0	0	0	0	0	0	0	0	0	0	0	0	0	0	0	0	0
1534	1	11378	113770000	113780000	0	0	0	1	0	0	0	0	0	0	0	0	0	5.21118e-06	0	0	0	0	0	0	0	0	0	0	0	0	0	0	0	1.35575e-06	1.35575e-06	0	0	0	0	0	0	0	0	0	0	0	0	0	0
1535	1	11379	113780000	113790000	0	0	0	0	0	3	0	0	0	0	0	0	0	0	0	4.19035e-05	0	0	0	0	0	0	0	0	0	0	0	1.55367e-06	0	0	1.55367e-06	0	0	0	0	0	0	0	0	0	0	0	0	0	0
1536	1	1138	11370000	11380000	0	0	0	0	0	2	0	0	0	0	0	0	0	0	0	2.79357e-05	0	0	0	0	0	0	0	0	0	0	0	1.03578e-06	0	0	1.03578e-06	0	0	0	0	0	0	0	0	0	0	0	0	0	0
1537	1	11380	113790000	113800000	0	0	0	1	0	0	1	0	0	0	0	0	0	5.21118e-06	0	0	1.16649e-05	0	0	0	0	0	0	0	0	0	0	0	6.11658e-07	1.35575e-06	1.96741e-06	0	0	0	0	0	0	0	0	0	0	0	0	0	0
1538	1	11381	113800000	113810000	0	0	0	2	0	2	1	0	0	0	0	0	0	1.04224e-05	0	2.79357e-05	1.16649e-05	0	0	0	0	0	0	0	0	0	0	1.03578e-06	6.11658e-07	2.7115e-06	4.35893e-06	0	0	0	0	0	0	0	0	0	0	0	0	0	0
1539	1	11382	113810000	113820000	0	0	0	0	0	0	0	0	0	0	0	0	0	0	0	0	0	0	0	0	0	0	0	0	0	0	0	0	0	0	0	0	0	0	0	0	0	0	0	0	0	0	0	0	0
1540	1	11383	113820000	113830000	0	0	0	0	0	0	0	0	0	0	0	0	0	0	0	0	0	0	0	0	0	0	0	0	0	0	0	0	0	0	0	0	0	0	0	0	0	0	0	0	0	0	0	0	0
1541	1	11384	113830000	113840000	0	0	0	1	0	0	0	0	0	0	0	0	0	5.21118e-06	0	0	0	0	0	0	0	0	0	0	0	0	0	0	0	1.35575e-06	1.35575e-06	0	0	0	0	0	0	0	0	0	0	0	0	0	0
1542	1	11385	113840000	113850000	0	0	0	1	0	0	0	0	0	0	0	0	0	5.21118e-06	0	0	0	0	0	0	0	0	0	0	0	0	0	0	0	1.35575e-06	1.35575e-06	0	0	0	0	0	0	0	0	0	0	0	0	0	0
1543	1	11386	113850000	113860000	0	0	0	0	0	0	0	0	0	0	0	0	0	0	0	0	0	0	0	0	0	0	0	0	0	0	0	0	0	0	0	0	0	0	0	0	0	0	0	0	0	0	0	0	0
1544	1	11387	113860000	113870000	0	0	0	3	0	3	0	0	0	0	0	0	0	1.56335e-05	0	4.19035e-05	0	0	0	0	0	0	0	0	0	0	0	1.55367e-06	0	4.06725e-06	5.62091e-06	0	0	0	0	0	0	0	0	0	0	0	0	0	0
1545	1	11388	113870000	113880000	0	0	0	1	0	7	0	0	0	0	0	0	0	5.21118e-06	0	9.77749e-05	0	0	0	0	0	0	0	0	0	0	0	3.62523e-06	0	1.35575e-06	4.98097e-06	0	0	0	0	0	1	0	0	0	0	0	0	0	0
1546	1	11389	113880000	113890000	0	0	0	4	0	0	3	0	0	0	0	0	0	2.08447e-05	0	0	3.49948e-05	0	0	0	0	0	0	0	0	0	0	0	1.83497e-06	5.42299e-06	7.25797e-06	0	0	0	0	0	0	0	0	0	0	0	0	0	0
1547	1	1139	11380000	11390000	0	0	0	0	0	0	1	0	0	0	0	0	0	0	0	0	1.16649e-05	0	0	0	0	0	0	0	0	0	0	0	6.11658e-07	0	6.11658e-07	0	0	0	0	0	0	0	0	0	0	0	0	0	0
1548	1	11390	113890000	113900000	0	0	0	1	0	0	0	0	0	0	0	0	0	5.21118e-06	0	0	0	0	0	0	0	0	0	0	0	0	0	0	0	1.35575e-06	1.35575e-06	0	0	0	0	0	0	0	0	0	0	0	0	0	0
1549	1	11391	113900000	113910000	0	0	0	0	0	0	0	0	0	0	0	0	0	0	0	0	0	0	0	0	0	0	0	0	0	0	0	0	0	0	0	0	0	0	0	0	0	0	0	0	0	0	0	0	0
1550	1	11392	113910000	113920000	0	0	0	0	0	0	0	0	0	0	0	0	0	0	0	0	0	0	0	0	0	0	0	0	0	0	0	0	0	0	0	0	0	0	0	0	0	0	0	0	0	0	0	0	0
1551	1	11393	113920000	113930000	0	0	0	0	0	1	0	0	0	0	0	0	0	0	0	1.39678e-05	0	0	0	0	0	0	0	0	0	0	0	5.17889e-07	0	0	5.17889e-07	0	0	0	0	0	0	0	0	0	0	0	0	0	0
1552	1	11394	113930000	113940000	0	0	0	1	0	0	0	0	0	0	0	0	0	5.21118e-06	0	0	0	0	0	0	0	0	0	0	0	0	0	0	0	1.35575e-06	1.35575e-06	0	0	0	0	0	0	0	0	0	0	0	0	0	0
1553	1	11395	113940000	113950000	0	0	0	1	0	0	1	0	0	0	0	0	0	5.21118e-06	0	0	1.16649e-05	0	0	0	0	0	0	0	0	0	0	0	6.11658e-07	1.35575e-06	1.96741e-06	0	0	0	0	0	0	0	0	0	0	0	0	0	0
1554	1	11396	113950000	113960000	0	0	0	1	0	0	0	0	0	0	0	0	0	5.21118e-06	0	0	0	0	0	0	0	0	0	0	0	0	0	0	0	1.35575e-06	1.35575e-06	0	0	0	0	0	0	0	0	0	0	0	0	0	0
1555	1	11397	113960000	113970000	0	0	0	0	2	1	1	0	0	0	0	0	0	0	8.96419e-05	1.39678e-05	1.16649e-05	0	0	0	0	0	0	0	1.0875e-05	0	0	5.17889e-07	6.11658e-07	0	1.20045e-05	0	0	0	0	0	0	0	0	0	0	0	0	0	0
1556	1	11398	113970000	113980000	0	0	0	0	3	0	0	0	0	0	0	0	0	0	0.000134463	0	0	0	0	0	0	0	0	0	1.63124e-05	0	0	0	0	0	1.63124e-05	0	0	0	0	0	0	0	0	0	0	0	0	0	0
1557	1	11399	113980000	113990000	0	0	0	0	0	0	0	0	0	0	0	0	0	0	0	0	0	0	0	0	0	0	0	0	0	0	0	0	0	0	0	0	0	0	0	0	0	0	0	0	0	0	0	0	0
1558	1	114	1130000	1140000	0	0	0	0	0	0	2	10	1	0	0	0	0	0	0	0	2.33299e-05	0.00020859	1.82652e-05	0	0	0	0	0	0	3.59838e-05	6.57388e-07	0	1.22332e-06	0	3.78645e-05	0	0	0	0	0	0	0	0	0	0	0	0	0	0
1559	1	1140	11390000	11400000	0	0	0	0	0	0	0	0	0	0	0	0	0	0	0	0	0	0	0	0	0	0	0	0	0	0	0	0	0	0	0	0	0	0	0	0	0	0	0	0	0	0	0	0	0
1560	1	11400	113990000	114000000	0	0	0	0	0	0	0	0	0	0	0	0	0	0	0	0	0	0	0	0	0	0	0	0	0	0	0	0	0	0	0	0	0	0	0	0	0	0	0	0	0	0	0	0	0
1561	1	11401	114000000	114010000	0	0	0	0	2	0	0	0	0	0	0	0	0	0	8.96419e-05	0	0	0	0	0	0	0	0	0	1.0875e-05	0	0	0	0	0	1.0875e-05	0	0	0	0	0	0	0	0	0	0	0	0	0	0
1562	1	11402	114010000	114020000	0	0	0	0	0	0	0	0	0	0	0	0	0	0	0	0	0	0	0	0	0	0	0	0	0	0	0	0	0	0	0	0	0	0	0	0	0	0	0	0	0	0	0	0	0
1563	1	11403	114020000	114030000	0	0	0	1	0	0	0	0	0	0	0	0	0	5.21118e-06	0	0	0	0	0	0	0	0	0	0	0	0	0	0	0	1.35575e-06	1.35575e-06	0	0	0	0	0	0	0	0	0	0	0	0	0	0
1564	1	11404	114030000	114040000	0	0	0	2	0	0	2	0	0	0	0	0	0	1.04224e-05	0	0	2.33299e-05	0	0	0	0	0	0	0	0	0	0	0	1.22332e-06	2.7115e-06	3.93481e-06	0	0	0	0	0	0	0	0	0	0	0	0	0	0
1565	1	11405	114040000	114050000	0	0	0	1	0	0	1	0	0	0	0	0	0	5.21118e-06	0	0	1.16649e-05	0	0	0	0	0	0	0	0	0	0	0	6.11658e-07	1.35575e-06	1.96741e-06	0	0	0	0	0	0	0	0	0	0	0	0	0	0
1566	1	11406	114050000	114060000	0	0	0	1	0	0	0	0	0	0	0	0	0	5.21118e-06	0	0	0	0	0	0	0	0	0	0	0	0	0	0	0	1.35575e-06	1.35575e-06	0	0	0	0	0	0	0	0	0	0	0	0	0	0
1567	1	11407	114060000	114070000	0	0	0	0	0	0	0	0	0	0	0	0	0	0	0	0	0	0	0	0	0	0	0	0	0	0	0	0	0	0	0	0	0	0	0	0	0	0	0	0	0	0	0	0	0
1568	1	11408	114070000	114080000	0	0	0	1	0	0	0	0	0	0	0	0	0	5.21118e-06	0	0	0	0	0	0	0	0	0	0	0	0	0	0	0	1.35575e-06	1.35575e-06	0	0	0	0	0	0	0	0	0	0	0	0	0	0
1569	1	11409	114080000	114090000	0	0	0	1	0	0	2	0	0	0	0	0	0	5.21118e-06	0	0	2.33299e-05	0	0	0	0	0	0	0	0	0	0	0	1.22332e-06	1.35575e-06	2.57906e-06	0	0	0	0	0	0	0	0	0	0	0	0	0	0
1570	1	1141	11400000	11410000	0	0	0	1	0	4	0	0	0	0	0	0	0	5.21118e-06	0	5.58714e-05	0	0	0	0	0	0	0	0	0	0	0	2.07156e-06	0	1.35575e-06	3.42731e-06	0	0	0	0	0	0	0	0	0	0	0	0	0	0
1571	1	11410	114090000	114100000	0	0	0	1	0	0	0	3	0	0	0	0	0	5.21118e-06	0	0	0	6.25769e-05	0	0	0	0	0	0	0	1.07951e-05	0	0	0	1.35575e-06	1.21509e-05	0	0	0	0	0	0	0	0	0	0	0	0	0	0
1572	1	11411	114100000	114110000	0	0	0	0	0	0	0	0	0	0	0	0	0	0	0	0	0	0	0	0	0	0	0	0	0	0	0	0	0	0	0	0	0	0	0	0	0	0	0	0	0	0	0	0	0
1573	1	11412	114110000	114120000	0	0	0	5	1	0	0	0	0	0	0	0	0	2.60559e-05	4.48209e-05	0	0	0	0	0	0	0	0	0	5.43748e-06	0	0	0	0	6.77874e-06	1.22162e-05	0	0	0	0	0	0	0	0	0	0	0	0	0	0
1574	1	11413	114120000	114130000	0	0	0	1	0	0	0	0	0	0	0	0	0	5.21118e-06	0	0	0	0	0	0	0	0	0	0	0	0	0	0	0	1.35575e-06	1.35575e-06	0	0	0	0	0	0	0	0	0	0	0	0	0	0
1575	1	11414	114130000	114140000	0	0	0	0	0	0	0	0	0	0	0	0	0	0	0	0	0	0	0	0	0	0	0	0	0	0	0	0	0	0	0	0	0	0	0	0	0	0	0	0	0	0	0	0	0
1576	1	11415	114140000	114150000	0	0	0	0	0	0	0	0	0	0	0	0	0	0	0	0	0	0	0	0	0	0	0	0	0	0	0	0	0	0	0	0	0	0	0	0	0	0	0	0	0	0	0	0	0
1577	1	11416	114150000	114160000	0	0	0	0	1	0	0	0	1	0	0	0	0	0	4.48209e-05	0	0	0	1.82652e-05	0	0	0	0	0	5.43748e-06	0	6.57388e-07	0	0	0	6.09486e-06	0	0	0	0	0	0	0	0	0	0	0	0	0	0
1578	1	11417	114160000	114170000	0	0	0	0	0	0	8	0	0	0	0	0	0	0	0	0	9.33195e-05	0	0	0	0	0	0	0	0	0	0	0	4.89327e-06	0	4.89327e-06	0	0	0	0	0	0	0	0	0	0	0	0	0	0
1579	1	11418	114170000	114180000	0	0	0	0	0	0	0	0	0	0	0	0	0	0	0	0	0	0	0	0	0	0	0	0	0	0	0	0	0	0	0	0	0	0	0	0	0	0	0	0	0	0	0	0	0
1580	1	11419	114180000	114190000	0	0	0	0	0	0	0	0	0	0	0	0	0	0	0	0	0	0	0	0	0	0	0	0	0	0	0	0	0	0	0	0	0	0	0	0	0	0	0	0	0	0	0	0	0
1581	1	1142	11410000	11420000	0	0	0	0	0	0	0	0	0	0	0	0	0	0	0	0	0	0	0	0	0	0	0	0	0	0	0	0	0	0	0	0	0	0	0	0	0	0	0	0	0	0	0	0	0
1582	1	11420	114190000	114200000	0	0	0	1	0	0	0	0	0	0	0	0	0	5.21118e-06	0	0	0	0	0	0	0	0	0	0	0	0	0	0	0	1.35575e-06	1.35575e-06	0	0	0	0	0	0	0	0	0	0	0	0	0	0
1583	1	11421	114200000	114210000	0	0	0	0	0	0	0	0	0	0	0	0	0	0	0	0	0	0	0	0	0	0	0	0	0	0	0	0	0	0	0	0	0	0	0	0	0	0	0	0	0	0	0	0	0
1584	1	11422	114210000	114220000	0	0	0	1	0	0	0	0	0	0	0	0	0	5.21118e-06	0	0	0	0	0	0	0	0	0	0	0	0	0	0	0	1.35575e-06	1.35575e-06	0	0	0	0	0	0	0	0	0	0	0	0	0	0
1585	1	11423	114220000	114230000	0	0	0	1	0	0	0	0	0	0	0	0	0	5.21118e-06	0	0	0	0	0	0	0	0	0	0	0	0	0	0	0	1.35575e-06	1.35575e-06	0	0	0	0	0	0	0	0	0	0	0	0	0	0
1586	1	11424	114230000	114240000	0	0	0	2	0	0	0	1	0	0	0	0	0	1.04224e-05	0	0	0	2.0859e-05	0	0	0	0	0	0	0	3.59838e-06	0	0	0	2.7115e-06	6.30988e-06	0	0	0	0	0	0	0	0	0	0	0	0	0	0
1587	1	11425	114240000	114250000	0	0	0	0	0	4	0	0	0	0	0	0	0	0	0	5.58714e-05	0	0	0	0	0	0	0	0	0	0	0	2.07156e-06	0	0	2.07156e-06	0	0	0	0	0	0	0	0	0	0	0	0	0	0
1588	1	11426	114250000	114260000	0	0	0	0	0	1	0	0	0	0	0	0	0	0	0	1.39678e-05	0	0	0	0	0	0	0	0	0	0	0	5.17889e-07	0	0	5.17889e-07	0	0	0	0	0	0	0	0	0	0	0	0	0	0
1589	1	11427	114260000	114270000	0	0	0	0	0	0	2	0	0	0	0	0	0	0	0	0	2.33299e-05	0	0	0	0	0	0	0	0	0	0	0	1.22332e-06	0	1.22332e-06	0	0	0	0	0	0	0	0	0	0	0	0	0	0
1590	1	11428	114270000	114280000	0	0	0	0	0	1	0	0	0	1	0	0	0	0	0	1.39678e-05	0	0	0	0.000147449	0	0	0	1.93976e-05	0	0	0	5.17889e-07	0	0	1.99155e-05	0	0	0	0	0	0	0	0	0	0	0	0	0	0
1591	1	11429	114280000	114290000	0	0	0	1	0	0	0	0	0	0	0	0	0	5.21118e-06	0	0	0	0	0	0	0	0	0	0	0	0	0	0	0	1.35575e-06	1.35575e-06	0	0	0	0	0	0	0	0	0	0	0	0	0	0
1592	1	1143	11420000	11430000	0	0	0	2	0	0	0	0	0	0	0	0	0	1.04224e-05	0	0	0	0	0	0	0	0	0	0	0	0	0	0	0	2.7115e-06	2.7115e-06	0	0	0	0	0	0	0	0	0	0	0	0	0	0
1593	1	11430	114290000	114300000	0	0	0	0	0	0	0	0	0	0	0	0	0	0	0	0	0	0	0	0	0	0	0	0	0	0	0	0	0	0	0	0	0	0	0	0	0	0	0	0	0	0	0	0	0
1594	1	11431	114300000	114310000	0	0	0	3	0	0	0	0	0	0	0	0	0	1.56335e-05	0	0	0	0	0	0	0	0	0	0	0	0	0	0	0	4.06725e-06	4.06725e-06	0	0	0	0	0	0	0	0	0	0	0	0	0	0
1595	1	11432	114310000	114320000	0	0	0	1	0	0	4	0	0	0	0	0	0	5.21118e-06	0	0	4.66597e-05	0	0	0	0	0	0	0	0	0	0	0	2.44663e-06	1.35575e-06	3.80238e-06	0	0	0	0	0	0	0	0	0	0	0	0	0	0
1596	1	11433	114320000	114330000	0	0	0	0	0	0	1	0	0	0	0	0	0	0	0	0	1.16649e-05	0	0	0	0	0	0	0	0	0	0	0	6.11658e-07	0	6.11658e-07	0	0	0	0	0	0	0	0	0	0	0	0	0	0
1597	1	11434	114330000	114340000	0	0	0	1	0	0	1	0	0	0	0	0	0	5.21118e-06	0	0	1.16649e-05	0	0	0	0	0	0	0	0	0	0	0	6.11658e-07	1.35575e-06	1.96741e-06	0	0	0	0	0	0	0	0	0	0	0	0	0	0
1598	1	11435	114340000	114350000	0	0	0	1	0	0	0	0	0	1	0	0	0	5.21118e-06	0	0	0	0	0	0.000147449	0	0	0	1.93976e-05	0	0	0	0	0	1.35575e-06	2.07533e-05	0	0	0	0	0	0	0	0	0	0	0	0	0	0
1599	1	11436	114350000	114360000	0	0	0	0	0	0	0	0	0	0	0	0	0	0	0	0	0	0	0	0	0	0	0	0	0	0	0	0	0	0	0	0	0	0	0	0	0	0	0	0	0	0	0	0	0
1600	1	11437	114360000	114370000	0	0	0	2	0	0	0	0	0	0	0	0	0	1.04224e-05	0	0	0	0	0	0	0	0	0	0	0	0	0	0	0	2.7115e-06	2.7115e-06	0	0	0	0	0	0	0	0	0	0	0	0	0	0
1601	1	11438	114370000	114380000	0	0	0	1	0	0	0	0	0	0	0	0	0	5.21118e-06	0	0	0	0	0	0	0	0	0	0	0	0	0	0	0	1.35575e-06	1.35575e-06	0	0	0	0	0	0	0	0	0	0	0	0	0	0
1602	1	11439	114380000	114390000	0	0	0	0	0	0	0	0	1	0	0	0	0	0	0	0	0	0	1.82652e-05	0	0	0	0	0	0	0	6.57388e-07	0	0	0	6.57388e-07	0	0	0	0	0	0	0	0	0	0	0	0	0	0
1603	1	1144	11430000	11440000	0	0	0	0	0	0	0	0	0	0	0	0	0	0	0	0	0	0	0	0	0	0	0	0	0	0	0	0	0	0	0	0	0	0	0	0	0	0	0	0	0	0	0	0	0
1604	1	11440	114390000	114400000	0	0	0	0	0	3	0	0	0	0	0	0	0	0	0	4.19035e-05	0	0	0	0	0	0	0	0	0	0	0	1.55367e-06	0	0	1.55367e-06	0	0	0	0	0	0	0	0	0	0	0	0	0	0
1605	1	11441	114400000	114410000	0	0	0	1	0	2	0	0	0	0	0	0	0	5.21118e-06	0	2.79357e-05	0	0	0	0	0	0	0	0	0	0	0	1.03578e-06	0	1.35575e-06	2.39153e-06	0	0	0	0	0	0	0	0	0	0	0	0	0	0
1606	1	11442	114410000	114420000	0	0	0	1	0	0	0	0	0	0	0	0	0	5.21118e-06	0	0	0	0	0	0	0	0	0	0	0	0	0	0	0	1.35575e-06	1.35575e-06	0	0	0	0	0	0	0	0	0	0	0	0	0	0
1607	1	11443	114420000	114430000	0	0	0	5	0	0	0	0	0	0	0	0	0	2.60559e-05	0	0	0	0	0	0	0	0	0	0	0	0	0	0	0	6.77874e-06	6.77874e-06	0	0	0	0	0	0	0	0	0	0	0	0	0	0
1608	1	11444	114430000	114440000	0	0	0	6	0	1	0	0	0	0	0	0	0	3.12671e-05	0	1.39678e-05	0	0	0	0	0	0	0	0	0	0	0	5.17889e-07	0	8.13449e-06	8.65238e-06	0	0	0	0	0	0	0	0	0	0	0	0	0	0
1609	1	11445	114440000	114450000	0	0	0	0	0	0	0	0	0	0	0	0	0	0	0	0	0	0	0	0	0	0	0	0	0	0	0	0	0	0	0	0	0	0	0	0	0	0	0	0	0	0	0	0	0
1610	1	11446	114450000	114460000	0	0	0	1	0	0	0	0	0	0	0	0	0	5.21118e-06	0	0	0	0	0	0	0	0	0	0	0	0	0	0	0	1.35575e-06	1.35575e-06	0	0	0	0	0	0	0	0	0	0	0	0	0	0
1611	1	11447	114460000	114470000	0	0	0	1	0	0	0	0	0	0	0	0	0	5.21118e-06	0	0	0	0	0	0	0	0	0	0	0	0	0	0	0	1.35575e-06	1.35575e-06	0	0	0	0	0	0	0	0	0	0	0	0	0	0
1612	1	11448	114470000	114480000	0	0	0	2	0	4	1	0	0	0	0	0	0	1.04224e-05	0	5.58714e-05	1.16649e-05	0	0	0	0	0	0	0	0	0	0	2.07156e-06	6.11658e-07	2.7115e-06	5.39471e-06	0	0	0	0	0	0	0	0	0	0	0	0	0	0
1613	1	11449	114480000	114490000	0	0	0	0	0	0	0	0	0	0	0	0	0	0	0	0	0	0	0	0	0	0	0	0	0	0	0	0	0	0	0	0	0	0	0	0	0	0	0	0	0	0	0	0	0
1614	1	1145	11440000	11450000	0	0	0	0	0	0	0	0	0	0	0	0	0	0	0	0	0	0	0	0	0	0	0	0	0	0	0	0	0	0	0	0	0	0	0	0	0	0	0	0	0	0	0	0	0
1615	1	11450	114490000	114500000	0	0	0	0	0	0	0	0	0	0	0	0	0	0	0	0	0	0	0	0	0	0	0	0	0	0	0	0	0	0	0	0	0	0	0	0	0	0	0	0	0	0	0	0	0
1616	1	11451	114500000	114510000	0	0	0	2	0	0	0	0	0	0	0	0	0	1.04224e-05	0	0	0	0	0	0	0	0	0	0	0	0	0	0	0	2.7115e-06	2.7115e-06	0	0	0	0	0	0	0	0	0	0	0	0	0	0
1617	1	11452	114510000	114520000	0	0	0	1	1	0	0	0	0	0	0	0	0	5.21118e-06	4.48209e-05	0	0	0	0	0	0	0	0	0	5.43748e-06	0	0	0	0	1.35575e-06	6.79323e-06	0	0	0	0	0	0	0	0	0	0	0	0	0	0
1618	1	11453	114520000	114530000	0	0	0	0	0	2	0	0	0	0	0	0	0	0	0	2.79357e-05	0	0	0	0	0	0	0	0	0	0	0	1.03578e-06	0	0	1.03578e-06	0	0	0	0	0	0	0	0	0	0	0	0	0	0
1619	1	11454	114530000	114540000	0	0	0	1	0	0	0	0	1	0	0	0	0	5.21118e-06	0	0	0	0	1.82652e-05	0	0	0	0	0	0	0	6.57388e-07	0	0	1.35575e-06	2.01314e-06	0	0	0	0	0	0	0	0	0	0	0	0	0	0
1620	1	11455	114540000	114550000	0	0	0	0	0	0	0	1	0	0	0	0	0	0	0	0	0	2.0859e-05	0	0	0	0	0	0	0	3.59838e-06	0	0	0	0	3.59838e-06	0	0	0	0	0	0	0	0	0	0	0	0	0	0
1621	1	11456	114550000	114560000	0	0	0	3	0	2	0	0	0	0	0	0	0	1.56335e-05	0	2.79357e-05	0	0	0	0	0	0	0	0	0	0	0	1.03578e-06	0	4.06725e-06	5.10302e-06	0	0	0	0	0	0	0	0	0	0	0	0	0	0
1622	1	11457	114560000	114570000	0	0	0	1	0	0	0	0	0	0	0	0	0	5.21118e-06	0	0	0	0	0	0	0	0	0	0	0	0	0	0	0	1.35575e-06	1.35575e-06	0	0	0	0	0	0	0	0	0	0	0	0	0	0
1623	1	11458	114570000	114580000	0	0	0	1	0	0	0	0	0	0	0	0	0	5.21118e-06	0	0	0	0	0	0	0	0	0	0	0	0	0	0	0	1.35575e-06	1.35575e-06	0	0	0	0	0	0	0	0	0	0	0	0	0	0
1624	1	11459	114580000	114590000	0	0	0	2	0	0	0	0	0	0	0	0	0	1.04224e-05	0	0	0	0	0	0	0	0	0	0	0	0	0	0	0	2.7115e-06	2.7115e-06	0	0	0	0	0	0	0	0	0	0	0	0	0	0
1625	1	1146	11450000	11460000	0	0	0	0	0	0	0	0	0	0	0	0	0	0	0	0	0	0	0	0	0	0	0	0	0	0	0	0	0	0	0	0	0	0	0	0	0	0	0	0	0	0	0	0	0
1626	1	11460	114590000	114600000	0	0	0	0	0	0	0	0	0	0	0	0	0	0	0	0	0	0	0	0	0	0	0	0	0	0	0	0	0	0	0	0	0	0	0	0	0	0	0	0	0	0	0	0	0
1627	1	11461	114600000	114610000	0	0	0	1	0	0	0	0	2	0	0	0	0	5.21118e-06	0	0	0	0	3.65303e-05	0	0	0	0	0	0	0	1.31478e-06	0	0	1.35575e-06	2.67052e-06	0	0	0	0	0	0	0	0	0	0	0	0	0	0
1628	1	11462	114610000	114620000	0	0	0	3	0	0	0	0	0	0	0	0	0	1.56335e-05	0	0	0	0	0	0	0	0	0	0	0	0	0	0	0	4.06725e-06	4.06725e-06	0	0	0	0	0	0	0	0	0	0	0	0	0	0
1629	1	11463	114620000	114630000	0	0	0	0	0	0	1	0	1	0	0	0	0	0	0	0	1.16649e-05	0	1.82652e-05	0	0	0	0	0	0	0	6.57388e-07	0	6.11658e-07	0	1.26905e-06	0	0	0	0	0	0	0	0	0	0	0	0	0	0
1630	1	11464	114630000	114640000	0	0	0	1	0	3	0	0	0	0	0	0	0	5.21118e-06	0	4.19035e-05	0	0	0	0	0	0	0	0	0	0	0	1.55367e-06	0	1.35575e-06	2.90942e-06	0	0	0	0	0	0	0	0	0	0	0	0	0	0
1631	1	11465	114640000	114650000	0	0	0	1	0	0	0	0	0	0	0	0	0	5.21118e-06	0	0	0	0	0	0	0	0	0	0	0	0	0	0	0	1.35575e-06	1.35575e-06	0	0	0	0	0	0	0	0	0	0	0	0	0	0
1632	1	11466	114650000	114660000	0	0	0	1	0	1	1	0	0	0	0	0	0	5.21118e-06	0	1.39678e-05	1.16649e-05	0	0	0	0	0	0	0	0	0	0	5.17889e-07	6.11658e-07	1.35575e-06	2.4853e-06	0	0	0	0	0	0	0	0	0	0	0	0	0	0
1633	1	11467	114660000	114670000	0	0	0	1	0	0	0	0	0	0	0	0	0	5.21118e-06	0	0	0	0	0	0	0	0	0	0	0	0	0	0	0	1.35575e-06	1.35575e-06	0	0	0	0	0	0	0	0	0	0	0	0	0	0
1634	1	11468	114670000	114680000	0	0	0	2	0	0	0	0	0	0	0	0	0	1.04224e-05	0	0	0	0	0	0	0	0	0	0	0	0	0	0	0	2.7115e-06	2.7115e-06	0	0	0	0	0	0	0	0	0	0	0	0	0	0
1635	1	11469	114680000	114690000	0	0	0	0	0	0	0	0	1	0	0	0	0	0	0	0	0	0	1.82652e-05	0	0	0	0	0	0	0	6.57388e-07	0	0	0	6.57388e-07	0	0	0	0	0	0	0	0	0	0	0	0	0	0
1636	1	1147	11460000	11470000	0	0	0	0	0	0	0	0	0	0	0	0	0	0	0	0	0	0	0	0	0	0	0	0	0	0	0	0	0	0	0	0	0	0	0	0	0	0	0	0	0	0	0	0	0
1637	1	11470	114690000	114700000	0	0	0	0	0	0	0	0	0	0	0	0	0	0	0	0	0	0	0	0	0	0	0	0	0	0	0	0	0	0	0	0	0	0	0	0	0	0	0	0	0	0	0	0	0
1638	1	11471	114700000	114710000	0	0	0	0	0	0	0	0	0	0	0	0	0	0	0	0	0	0	0	0	0	0	0	0	0	0	0	0	0	0	0	0	0	0	0	0	0	0	0	0	0	0	0	0	0
1639	1	11472	114710000	114720000	0	0	0	0	0	0	0	0	0	0	0	0	0	0	0	0	0	0	0	0	0	0	0	0	0	0	0	0	0	0	0	0	0	0	0	0	0	0	0	0	0	0	0	0	0
1640	1	11473	114720000	114730000	0	0	0	1	0	0	0	0	0	0	0	0	0	5.21118e-06	0	0	0	0	0	0	0	0	0	0	0	0	0	0	0	1.35575e-06	1.35575e-06	0	0	0	0	0	0	0	0	0	0	0	0	0	0
1641	1	11474	114730000	114740000	0	0	0	0	0	0	1	0	0	0	0	0	0	0	0	0	1.16649e-05	0	0	0	0	0	0	0	0	0	0	0	6.11658e-07	0	6.11658e-07	0	0	0	0	0	0	0	0	0	0	0	0	0	0
1642	1	11475	114740000	114750000	0	0	0	0	0	0	0	0	0	0	0	0	0	0	0	0	0	0	0	0	0	0	0	0	0	0	0	0	0	0	0	0	0	0	0	0	0	0	0	0	0	0	0	0	0
1643	1	11476	114750000	114760000	0	0	0	0	0	0	0	0	0	0	0	0	0	0	0	0	0	0	0	0	0	0	0	0	0	0	0	0	0	0	0	0	0	0	0	0	0	0	0	0	0	0	0	0	0
1644	1	11477	114760000	114770000	0	0	0	0	0	0	0	0	0	0	0	0	0	0	0	0	0	0	0	0	0	0	0	0	0	0	0	0	0	0	0	0	0	0	0	0	0	0	0	0	0	0	0	0	0
1645	1	11478	114770000	114780000	0	0	0	0	0	0	0	0	0	0	0	0	0	0	0	0	0	0	0	0	0	0	0	0	0	0	0	0	0	0	0	0	0	0	0	0	0	0	0	0	0	0	0	0	0
1646	1	11479	114780000	114790000	0	0	0	3	0	0	6	0	0	0	0	0	0	1.56335e-05	0	0	6.99896e-05	0	0	0	0	0	0	0	0	0	0	0	3.66995e-06	4.06725e-06	7.73719e-06	0	0	0	0	0	0	0	0	0	0	0	0	0	0
1647	1	1148	11470000	11480000	0	0	0	0	0	1	0	0	0	0	0	0	0	0	0	1.39678e-05	0	0	0	0	0	0	0	0	0	0	0	5.17889e-07	0	0	5.17889e-07	0	0	0	0	0	0	0	0	0	0	0	0	0	0
1648	1	11480	114790000	114800000	0	0	0	0	0	0	0	0	0	0	0	0	0	0	0	0	0	0	0	0	0	0	0	0	0	0	0	0	0	0	0	0	0	0	0	0	0	0	0	0	0	0	0	0	0
1649	1	11481	114800000	114810000	0	0	0	0	0	0	0	0	0	0	0	0	0	0	0	0	0	0	0	0	0	0	0	0	0	0	0	0	0	0	0	0	0	0	0	0	0	0	0	0	0	0	0	0	0
1650	1	11482	114810000	114820000	0	0	0	0	0	0	0	0	0	0	0	0	0	0	0	0	0	0	0	0	0	0	0	0	0	0	0	0	0	0	0	0	0	0	0	0	0	0	0	0	0	0	0	0	0
1651	1	11483	114820000	114830000	0	0	0	0	0	0	0	0	0	0	0	0	0	0	0	0	0	0	0	0	0	0	0	0	0	0	0	0	0	0	0	0	0	0	0	0	0	0	0	0	0	0	0	0	0
1652	1	11484	114830000	114840000	0	0	0	2	0	0	0	0	0	0	0	0	0	1.04224e-05	0	0	0	0	0	0	0	0	0	0	0	0	0	0	0	2.7115e-06	2.7115e-06	0	0	0	0	0	0	0	0	0	0	0	0	0	0
1653	1	11485	114840000	114850000	0	0	0	0	0	0	0	0	1	0	0	0	0	0	0	0	0	0	1.82652e-05	0	0	0	0	0	0	0	6.57388e-07	0	0	0	6.57388e-07	0	0	0	0	0	0	0	0	0	0	0	0	0	0
1654	1	11486	114850000	114860000	0	0	0	0	0	0	0	0	0	0	0	0	0	0	0	0	0	0	0	0	0	0	0	0	0	0	0	0	0	0	0	0	0	0	0	0	0	0	0	0	0	0	0	0	0
1655	1	11487	114860000	114870000	0	0	0	0	0	1	0	0	1	0	0	0	0	0	0	1.39678e-05	0	0	1.82652e-05	0	0	0	0	0	0	0	6.57388e-07	5.17889e-07	0	0	1.17528e-06	0	0	0	0	0	0	0	0	0	0	0	0	0	0
1656	1	11488	114870000	114880000	0	0	0	0	0	0	0	0	0	0	0	0	0	0	0	0	0	0	0	0	0	0	0	0	0	0	0	0	0	0	0	0	0	0	0	0	0	0	0	0	0	0	0	0	0
1657	1	11489	114880000	114890000	0	0	0	2	0	1	0	0	1	0	0	0	0	1.04224e-05	0	1.39678e-05	0	0	1.82652e-05	0	0	0	0	0	0	0	6.57388e-07	5.17889e-07	0	2.7115e-06	3.88677e-06	0	0	0	0	0	0	0	0	0	0	0	0	0	0
1658	1	1149	11480000	11490000	0	0	0	0	0	1	0	0	0	0	0	0	0	0	0	1.39678e-05	0	0	0	0	0	0	0	0	0	0	0	5.17889e-07	0	0	5.17889e-07	0	0	0	0	0	0	0	0	0	0	0	0	0	0
1659	1	11490	114890000	114900000	0	0	0	0	1	1	0	0	0	0	0	0	0	0	4.48209e-05	1.39678e-05	0	0	0	0	0	0	0	0	5.43748e-06	0	0	5.17889e-07	0	0	5.95537e-06	0	0	0	0	0	0	0	0	0	0	0	0	0	0
1660	1	11491	114900000	114910000	0	0	0	0	0	0	0	0	0	0	0	0	0	0	0	0	0	0	0	0	0	0	0	0	0	0	0	0	0	0	0	0	0	0	0	0	0	0	0	0	0	0	0	0	0
1661	1	11492	114910000	114920000	0	0	0	3	0	0	0	0	0	0	0	0	0	1.56335e-05	0	0	0	0	0	0	0	0	0	0	0	0	0	0	0	4.06725e-06	4.06725e-06	0	0	0	0	0	0	0	0	0	0	0	0	0	0
1662	1	11493	114920000	114930000	0	0	0	1	0	1	0	0	0	0	0	0	0	5.21118e-06	0	1.39678e-05	0	0	0	0	0	0	0	0	0	0	0	5.17889e-07	0	1.35575e-06	1.87364e-06	0	0	0	0	0	0	0	0	0	0	0	0	0	0
1663	1	11494	114930000	114940000	0	0	0	2	0	0	0	0	2	0	0	0	0	1.04224e-05	0	0	0	0	3.65303e-05	0	0	0	0	0	0	0	1.31478e-06	0	0	2.7115e-06	4.02627e-06	0	0	0	0	0	0	0	0	0	0	0	0	0	0
1664	1	11495	114940000	114950000	0	0	0	1	1	0	0	0	0	0	0	0	0	5.21118e-06	4.48209e-05	0	0	0	0	0	0	0	0	0	5.43748e-06	0	0	0	0	1.35575e-06	6.79323e-06	0	0	0	0	0	0	0	0	0	0	0	0	0	0
1665	1	11496	114950000	114960000	0	0	0	2	0	0	0	0	0	0	0	0	0	1.04224e-05	0	0	0	0	0	0	0	0	0	0	0	0	0	0	0	2.7115e-06	2.7115e-06	0	0	0	0	0	0	0	0	0	0	0	0	0	0
1666	1	11497	114960000	114970000	0	0	0	0	0	0	0	0	0	0	0	0	0	0	0	0	0	0	0	0	0	0	0	0	0	0	0	0	0	0	0	0	0	0	0	0	0	0	0	0	0	0	0	0	0
1667	1	11498	114970000	114980000	0	0	0	0	0	0	0	0	0	0	0	0	0	0	0	0	0	0	0	0	0	0	0	0	0	0	0	0	0	0	0	0	0	0	0	0	0	0	0	0	0	0	0	0	0
1668	1	11499	114980000	114990000	0	0	0	0	0	0	0	0	0	0	0	0	0	0	0	0	0	0	0	0	0	0	0	0	0	0	0	0	0	0	0	0	0	0	0	0	0	0	0	0	0	0	0	0	0
1669	1	115	1140000	1150000	0	0	0	0	1	0	0	0	2	0	0	0	0	0	4.48209e-05	0	0	0	3.65303e-05	0	0	0	0	0	5.43748e-06	0	1.31478e-06	0	0	0	6.75225e-06	0	0	0	0	0	0	0	0	0	0	0	0	0	0
1670	1	1150	11490000	11500000	0	0	0	0	0	1	0	0	0	0	0	0	0	0	0	1.39678e-05	0	0	0	0	0	0	0	0	0	0	0	5.17889e-07	0	0	5.17889e-07	0	0	0	0	0	0	0	0	0	0	0	0	0	0
1671	1	11500	114990000	115000000	0	0	0	0	0	0	0	0	0	0	0	0	0	0	0	0	0	0	0	0	0	0	0	0	0	0	0	0	0	0	0	0	0	0	0	0	0	0	0	0	0	0	0	0	0
1672	1	11501	115000000	115010000	0	0	0	1	0	0	0	0	0	0	0	0	0	5.21118e-06	0	0	0	0	0	0	0	0	0	0	0	0	0	0	0	1.35575e-06	1.35575e-06	0	0	0	0	0	0	0	0	0	0	0	0	0	0
1673	1	11502	115010000	115020000	0	0	0	1	0	1	0	0	0	0	0	0	0	5.21118e-06	0	1.39678e-05	0	0	0	0	0	0	0	0	0	0	0	5.17889e-07	0	1.35575e-06	1.87364e-06	0	0	0	0	0	0	0	0	0	0	0	0	0	0
1674	1	11503	115020000	115030000	0	0	0	0	0	0	0	2	0	0	0	0	0	0	0	0	0	4.17179e-05	0	0	0	0	0	0	0	7.19677e-06	0	0	0	0	7.19677e-06	0	0	0	0	0	0	0	0	0	0	0	0	0	0
1675	1	11504	115030000	115040000	0	0	0	0	0	0	0	0	0	0	0	0	0	0	0	0	0	0	0	0	0	0	0	0	0	0	0	0	0	0	0	0	0	0	0	0	0	0	0	0	0	0	0	0	0
1676	1	11505	115040000	115050000	0	0	0	1	0	0	2	0	0	0	0	0	0	5.21118e-06	0	0	2.33299e-05	0	0	0	0	0	0	0	0	0	0	0	1.22332e-06	1.35575e-06	2.57906e-06	0	0	0	0	0	0	0	0	0	0	0	0	0	0
1677	1	11506	115050000	115060000	0	0	0	1	0	0	0	0	0	0	0	0	0	5.21118e-06	0	0	0	0	0	0	0	0	0	0	0	0	0	0	0	1.35575e-06	1.35575e-06	0	0	0	0	0	0	0	0	0	0	0	0	0	0
1678	1	11507	115060000	115070000	0	0	0	0	0	0	0	0	0	0	0	0	0	0	0	0	0	0	0	0	0	0	0	0	0	0	0	0	0	0	0	0	0	0	0	0	0	0	0	0	0	0	0	0	0
1679	1	11508	115070000	115080000	0	0	0	1	0	0	0	0	0	0	0	0	0	5.21118e-06	0	0	0	0	0	0	0	0	0	0	0	0	0	0	0	1.35575e-06	1.35575e-06	0	0	0	0	0	0	0	0	0	0	0	0	0	0
1680	1	11509	115080000	115090000	0	0	0	1	0	0	0	1	0	0	0	0	0	5.21118e-06	0	0	0	2.0859e-05	0	0	0	0	0	0	0	3.59838e-06	0	0	0	1.35575e-06	4.95413e-06	0	0	0	0	0	0	0	0	0	0	0	0	0	0
1681	1	1151	11500000	11510000	0	0	0	1	0	0	0	0	0	0	0	0	0	5.21118e-06	0	0	0	0	0	0	0	0	0	0	0	0	0	0	0	1.35575e-06	1.35575e-06	0	0	0	0	0	0	0	0	0	0	0	0	0	0
1682	1	11510	115090000	115100000	0	0	0	2	0	0	0	0	0	0	0	0	0	1.04224e-05	0	0	0	0	0	0	0	0	0	0	0	0	0	0	0	2.7115e-06	2.7115e-06	0	0	0	0	0	0	0	0	0	0	0	0	0	0
1683	1	11511	115100000	115110000	0	1	0	0	0	0	0	0	0	0	0	0.000392773	0	0	0	0	0	0	0	0	0	0	2.68104e-06	0	0	0	0	0	0	0	2.68104e-06	0	0	0	0	0	0	0	0	0	0	0	0	0	0
1684	1	11512	115110000	115120000	0	1	0	0	0	0	0	0	0	0	0	0.000392773	0	0	0	0	0	0	0	0	0	0	2.68104e-06	0	0	0	0	0	0	0	2.68104e-06	0	0	0	0	0	0	0	0	0	0	0	0	0	0
1685	1	11513	115120000	115130000	0	0	0	0	0	0	0	0	0	0	0	0	0	0	0	0	0	0	0	0	0	0	0	0	0	0	0	0	0	0	0	0	0	0	0	0	0	0	0	0	0	0	0	0	0
1686	1	11514	115130000	115140000	0	0	0	0	0	0	0	0	0	0	0	0	0	0	0	0	0	0	0	0	0	0	0	0	0	0	0	0	0	0	0	0	0	0	0	0	0	0	0	0	0	0	0	0	0
1687	1	11515	115140000	115150000	0	0	0	1	0	2	0	0	0	0	0	0	0	5.21118e-06	0	2.79357e-05	0	0	0	0	0	0	0	0	0	0	0	1.03578e-06	0	1.35575e-06	2.39153e-06	0	0	0	0	0	0	0	0	0	0	0	0	0	0
1688	1	11516	115150000	115160000	0	0	0	2	0	0	0	0	0	0	0	0	0	1.04224e-05	0	0	0	0	0	0	0	0	0	0	0	0	0	0	0	2.7115e-06	2.7115e-06	0	0	0	0	0	0	0	0	0	0	0	0	0	0
1689	1	11517	115160000	115170000	0	0	0	1	0	0	1	0	0	0	0	0	0	5.21118e-06	0	0	1.16649e-05	0	0	0	0	0	0	0	0	0	0	0	6.11658e-07	1.35575e-06	1.96741e-06	0	0	0	0	0	0	0	0	0	0	0	0	0	0
1690	1	11518	115170000	115180000	0	0	0	1	0	1	0	0	0	0	0	0	0	5.21118e-06	0	1.39678e-05	0	0	0	0	0	0	0	0	0	0	0	5.17889e-07	0	1.35575e-06	1.87364e-06	0	0	0	0	0	0	0	0	0	0	0	0	0	0
1691	1	11519	115180000	115190000	0	0	0	0	0	0	0	0	0	0	0	0	0	0	0	0	0	0	0	0	0	0	0	0	0	0	0	0	0	0	0	0	0	0	0	0	0	0	0	0	0	0	0	0	0
1692	1	1152	11510000	11520000	0	0	0	0	0	0	1	0	0	0	0	0	0	0	0	0	1.16649e-05	0	0	0	0	0	0	0	0	0	0	0	6.11658e-07	0	6.11658e-07	0	0	0	0	0	0	0	0	0	0	0	0	0	0
1693	1	11520	115190000	115200000	0	0	0	0	0	0	1	0	0	0	0	0	0	0	0	0	1.16649e-05	0	0	0	0	0	0	0	0	0	0	0	6.11658e-07	0	6.11658e-07	0	0	0	0	0	0	0	0	0	0	0	0	0	0
1694	1	11521	115200000	115210000	0	0	0	1	0	0	0	0	0	0	0	0	0	5.21118e-06	0	0	0	0	0	0	0	0	0	0	0	0	0	0	0	1.35575e-06	1.35575e-06	0	0	0	0	0	0	0	0	0	0	0	0	0	0
1695	1	11522	115210000	115220000	0	0	0	2	0	0	0	0	0	0	0	0	0	1.04224e-05	0	0	0	0	0	0	0	0	0	0	0	0	0	0	0	2.7115e-06	2.7115e-06	0	0	0	0	0	0	0	0	0	0	0	0	0	0
1696	1	11523	115220000	115230000	0	0	0	1	0	0	0	0	0	0	0	0	0	5.21118e-06	0	0	0	0	0	0	0	0	0	0	0	0	0	0	0	1.35575e-06	1.35575e-06	0	0	0	0	0	0	0	0	0	0	0	0	0	0
1697	1	11524	115230000	115240000	0	0	0	0	0	0	0	0	0	0	0	0	0	0	0	0	0	0	0	0	0	0	0	0	0	0	0	0	0	0	0	0	0	0	0	0	0	0	0	0	0	0	0	0	0
1698	1	11525	115240000	115250000	0	0	0	1	0	0	0	0	0	0	0	0	0	5.21118e-06	0	0	0	0	0	0	0	0	0	0	0	0	0	0	0	1.35575e-06	1.35575e-06	0	0	0	0	0	0	0	0	0	0	0	0	0	0
1699	1	11526	115250000	115260000	0	0	0	0	0	0	0	5	0	0	0	0	0	0	0	0	0	0.000104295	0	0	0	0	0	0	0	1.79919e-05	0	0	0	0	1.79919e-05	0	0	0	0	0	0	0	0	0	0	0	0	0	0
1700	1	11527	115260000	115270000	0	0	0	2	0	0	8	0	0	0	0	0	0	1.04224e-05	0	0	9.33195e-05	0	0	0	0	0	0	0	0	0	0	0	4.89327e-06	2.7115e-06	7.60476e-06	0	0	0	0	0	0	0	0	0	0	0	0	0	0
1701	1	11528	115270000	115280000	0	0	0	0	0	1	0	5	0	0	0	0	0	0	0	1.39678e-05	0	0.000104295	0	0	0	0	0	0	0	1.79919e-05	0	5.17889e-07	0	0	1.85098e-05	0	0	0	0	0	0	0	0	0	0	0	0	0	0
1702	1	11529	115280000	115290000	0	0	0	1	0	1	0	5	0	0	0	0	0	5.21118e-06	0	1.39678e-05	0	0.000104295	0	0	0	0	0	0	0	1.79919e-05	0	5.17889e-07	0	1.35575e-06	1.98656e-05	0	0	0	0	0	0	0	0	0	0	0	0	0	0
1703	1	1153	11520000	11530000	0	0	0	0	0	0	0	0	0	1	0	0	0	0	0	0	0	0	0	0.000147449	0	0	0	1.93976e-05	0	0	0	0	0	0	1.93976e-05	0	0	0	0	0	0	0	0	0	0	0	0	0	0
1704	1	11530	115290000	115300000	0	0	0	4	2	1	0	0	0	0	0	0	0	2.08447e-05	8.96419e-05	1.39678e-05	0	0	0	0	0	0	0	0	1.0875e-05	0	0	5.17889e-07	0	5.42299e-06	1.68158e-05	0	0	0	0	0	0	0	0	0	0	0	0	0	0
1705	1	11531	115300000	115310000	0	0	0	1	0	0	0	0	0	0	0	0	0	5.21118e-06	0	0	0	0	0	0	0	0	0	0	0	0	0	0	0	1.35575e-06	1.35575e-06	0	0	0	0	0	0	0	0	0	0	0	0	0	0
1706	1	11532	115310000	115320000	0	0	0	1	0	0	1	0	0	0	0	0	0	5.21118e-06	0	0	1.16649e-05	0	0	0	0	0	0	0	0	0	0	0	6.11658e-07	1.35575e-06	1.96741e-06	0	0	0	0	0	0	0	0	0	0	0	0	0	0
1707	1	11533	115320000	115330000	0	0	0	1	0	0	0	0	0	0	0	0	0	5.21118e-06	0	0	0	0	0	0	0	0	0	0	0	0	0	0	0	1.35575e-06	1.35575e-06	0	0	0	0	0	0	0	0	0	0	0	0	0	0
1708	1	11534	115330000	115340000	0	0	0	0	0	0	0	0	0	0	0	0	0	0	0	0	0	0	0	0	0	0	0	0	0	0	0	0	0	0	0	0	0	0	0	0	0	0	0	0	0	0	0	0	0
1709	1	11535	115340000	115350000	0	0	0	0	0	0	0	0	0	0	0	0	0	0	0	0	0	0	0	0	0	0	0	0	0	0	0	0	0	0	0	0	0	0	0	0	0	0	0	0	0	0	0	0	0
1710	1	11536	115350000	115360000	0	0	0	1	0	2	0	0	0	0	0	0	0	5.21118e-06	0	2.79357e-05	0	0	0	0	0	0	0	0	0	0	0	1.03578e-06	0	1.35575e-06	2.39153e-06	0	0	0	0	0	0	0	0	0	0	0	0	0	0
1711	1	11537	115360000	115370000	0	0	0	0	0	0	0	0	0	0	0	0	0	0	0	0	0	0	0	0	0	0	0	0	0	0	0	0	0	0	0	0	0	0	0	0	0	0	0	0	0	0	0	0	0
1712	1	11538	115370000	115380000	0	0	0	0	0	0	0	0	0	0	0	0	0	0	0	0	0	0	0	0	0	0	0	0	0	0	0	0	0	0	0	0	0	0	0	0	0	0	0	0	0	0	0	0	0
1713	1	11539	115380000	115390000	0	0	0	0	0	0	2	0	0	0	0	0	0	0	0	0	2.33299e-05	0	0	0	0	0	0	0	0	0	0	0	1.22332e-06	0	1.22332e-06	0	0	0	0	0	0	0	0	0	0	0	0	0	0
1714	1	1154	11530000	11540000	0	0	0	0	0	2	0	0	0	0	0	0	0	0	0	2.79357e-05	0	0	0	0	0	0	0	0	0	0	0	1.03578e-06	0	0	1.03578e-06	0	0	0	0	0	0	0	0	0	0	0	0	0	0
1715	1	11540	115390000	115400000	0	0	0	0	0	0	0	0	0	0	0	0	0	0	0	0	0	0	0	0	0	0	0	0	0	0	0	0	0	0	0	0	0	0	0	0	0	0	0	0	0	0	0	0	0
1716	1	11541	115400000	115410000	0	0	0	0	0	0	0	0	0	0	0	0	0	0	0	0	0	0	0	0	0	0	0	0	0	0	0	0	0	0	0	0	0	0	0	0	0	0	0	0	0	0	0	0	0
1717	1	11542	115410000	115420000	0	0	0	0	0	0	0	0	1	0	0	0	0	0	0	0	0	0	1.82652e-05	0	0	0	0	0	0	0	6.57388e-07	0	0	0	6.57388e-07	0	0	0	0	0	0	0	0	0	0	0	0	0	0
1718	1	11543	115420000	115430000	0	0	0	0	0	0	0	0	0	0	0	0	0	0	0	0	0	0	0	0	0	0	0	0	0	0	0	0	0	0	0	0	0	0	0	0	0	0	0	0	0	0	0	0	0
1719	1	11544	115430000	115440000	0	0	0	0	0	0	0	0	0	0	0	0	0	0	0	0	0	0	0	0	0	0	0	0	0	0	0	0	0	0	0	0	0	0	0	0	0	0	0	0	0	0	0	0	0
1720	1	11545	115440000	115450000	0	0	0	0	0	0	0	0	0	0	0	0	0	0	0	0	0	0	0	0	0	0	0	0	0	0	0	0	0	0	0	0	0	0	0	0	0	0	0	0	0	0	0	0	0
1721	1	11546	115450000	115460000	0	0	0	0	0	0	3	1	0	0	0	0	0	0	0	0	3.49948e-05	2.0859e-05	0	0	0	0	0	0	0	3.59838e-06	0	0	1.83497e-06	0	5.43336e-06	0	0	0	0	0	0	0	0	0	0	0	0	0	0
1722	1	11547	115460000	115470000	0	0	0	1	0	0	2	0	0	0	0	0	0	5.21118e-06	0	0	2.33299e-05	0	0	0	0	0	0	0	0	0	0	0	1.22332e-06	1.35575e-06	2.57906e-06	0	0	0	0	0	0	0	0	0	0	0	0	0	0
1723	1	11548	115470000	115480000	0	0	0	1	0	0	0	0	2	0	0	0	0	5.21118e-06	0	0	0	0	3.65303e-05	0	0	0	0	0	0	0	1.31478e-06	0	0	1.35575e-06	2.67052e-06	0	0	0	0	0	0	0	0	0	0	0	0	0	0
1724	1	11549	115480000	115490000	0	0	0	0	0	0	0	0	0	0	0	0	0	0	0	0	0	0	0	0	0	0	0	0	0	0	0	0	0	0	0	0	0	0	0	0	0	0	0	0	0	0	0	0	0
1725	1	1155	11540000	11550000	0	0	0	0	0	0	4	0	0	0	0	0	0	0	0	0	4.66597e-05	0	0	0	0	0	0	0	0	0	0	0	2.44663e-06	0	2.44663e-06	0	0	0	0	0	0	0	0	0	0	0	0	0	0
1726	1	11550	115490000	115500000	0	0	0	0	0	0	0	0	0	0	0	0	0	0	0	0	0	0	0	0	0	0	0	0	0	0	0	0	0	0	0	0	0	0	0	0	0	0	0	0	0	0	0	0	0
1727	1	11551	115500000	115510000	0	0	0	0	0	0	0	0	0	0	0	0	0	0	0	0	0	0	0	0	0	0	0	0	0	0	0	0	0	0	0	0	0	0	0	0	0	0	0	0	0	0	0	0	0
1728	1	11552	115510000	115520000	0	0	0	0	0	0	0	0	0	0	0	0	0	0	0	0	0	0	0	0	0	0	0	0	0	0	0	0	0	0	0	0	0	0	0	0	0	0	0	0	0	0	0	0	0
1729	1	11553	115520000	115530000	0	0	0	0	0	0	0	0	1	0	0	0	0	0	0	0	0	0	1.82652e-05	0	0	0	0	0	0	0	6.57388e-07	0	0	0	6.57388e-07	0	0	0	0	0	0	0	0	0	0	0	0	0	0
1730	1	11554	115530000	115540000	0	0	0	1	0	0	0	0	0	0	0	0	0	5.21118e-06	0	0	0	0	0	0	0	0	0	0	0	0	0	0	0	1.35575e-06	1.35575e-06	0	0	0	0	0	0	0	0	0	0	0	0	0	0
1731	1	11555	115540000	115550000	0	0	0	1	0	0	3	0	0	0	0	0	0	5.21118e-06	0	0	3.49948e-05	0	0	0	0	0	0	0	0	0	0	0	1.83497e-06	1.35575e-06	3.19072e-06	0	0	0	0	0	0	0	0	0	0	0	0	0	0
1732	1	11556	115550000	115560000	0	0	0	0	0	2	0	0	0	0	0	0	0	0	0	2.79357e-05	0	0	0	0	0	0	0	0	0	0	0	1.03578e-06	0	0	1.03578e-06	0	0	0	0	0	0	0	0	0	0	0	0	0	0
1733	1	11557	115560000	115570000	0	0	0	1	0	0	0	1	0	0	0	0	0	5.21118e-06	0	0	0	2.0859e-05	0	0	0	0	0	0	0	3.59838e-06	0	0	0	1.35575e-06	4.95413e-06	0	0	0	0	0	0	0	0	0	0	0	0	0	0
1734	1	11558	115570000	115580000	0	0	0	1	0	0	0	0	0	0	0	0	0	5.21118e-06	0	0	0	0	0	0	0	0	0	0	0	0	0	0	0	1.35575e-06	1.35575e-06	0	0	0	0	0	0	0	0	0	0	0	0	0	0
1735	1	11559	115580000	115590000	0	0	0	0	0	0	0	0	0	0	0	0	0	0	0	0	0	0	0	0	0	0	0	0	0	0	0	0	0	0	0	0	0	0	0	0	0	0	0	0	0	0	0	0	0
1736	1	1156	11550000	11560000	0	0	0	0	0	0	0	2	0	0	0	0	0	0	0	0	0	4.17179e-05	0	0	0	0	0	0	0	7.19677e-06	0	0	0	0	7.19677e-06	0	0	0	0	0	0	0	0	0	0	0	0	0	0
1737	1	11560	115590000	115600000	0	0	0	0	0	0	0	0	2	0	0	0	0	0	0	0	0	0	3.65303e-05	0	0	0	0	0	0	0	1.31478e-06	0	0	0	1.31478e-06	0	0	0	0	0	0	0	0	0	0	0	0	0	0
1738	1	11561	115600000	115610000	0	0	0	1	0	0	0	0	0	0	0	0	0	5.21118e-06	0	0	0	0	0	0	0	0	0	0	0	0	0	0	0	1.35575e-06	1.35575e-06	0	0	0	0	0	0	0	0	0	0	0	0	0	0
1739	1	11562	115610000	115620000	0	0	0	0	0	0	0	1	0	0	0	0	0	0	0	0	0	2.0859e-05	0	0	0	0	0	0	0	3.59838e-06	0	0	0	0	3.59838e-06	0	0	0	0	0	0	0	0	0	0	0	0	0	0
1740	1	11563	115620000	115630000	0	0	0	0	0	0	0	0	0	0	0	0	0	0	0	0	0	0	0	0	0	0	0	0	0	0	0	0	0	0	0	0	0	0	0	0	0	0	0	0	0	0	0	0	0
1741	1	11564	115630000	115640000	0	0	0	0	0	0	0	0	0	0	0	0	0	0	0	0	0	0	0	0	0	0	0	0	0	0	0	0	0	0	0	0	0	0	0	0	0	0	0	0	0	0	0	0	0
1742	1	11565	115640000	115650000	0	0	0	0	0	0	0	0	1	0	0	0	0	0	0	0	0	0	1.82652e-05	0	0	0	0	0	0	0	6.57388e-07	0	0	0	6.57388e-07	0	0	0	0	0	0	0	0	0	0	0	0	0	0
1743	1	11566	115650000	115660000	0	0	0	1	0	2	0	0	0	0	0	0	0	5.21118e-06	0	2.79357e-05	0	0	0	0	0	0	0	0	0	0	0	1.03578e-06	0	1.35575e-06	2.39153e-06	0	0	0	0	0	0	0	0	0	0	0	0	0	0
1744	1	11567	115660000	115670000	0	0	0	0	0	0	0	0	1	0	0	0	0	0	0	0	0	0	1.82652e-05	0	0	0	0	0	0	0	6.57388e-07	0	0	0	6.57388e-07	0	0	0	0	0	0	0	0	0	0	0	0	0	0
1745	1	11568	115670000	115680000	0	0	0	0	0	0	0	0	1	0	0	0	0	0	0	0	0	0	1.82652e-05	0	0	0	0	0	0	0	6.57388e-07	0	0	0	6.57388e-07	0	0	0	0	0	0	0	0	0	0	0	0	0	0
1746	1	11569	115680000	115690000	0	0	0	2	0	0	0	0	1	0	0	0	0	1.04224e-05	0	0	0	0	1.82652e-05	0	0	0	0	0	0	0	6.57388e-07	0	0	2.7115e-06	3.36888e-06	0	0	0	0	0	0	0	0	0	0	0	0	0	0
1747	1	1157	11560000	11570000	0	0	0	3	0	0	0	0	0	0	0	0	0	1.56335e-05	0	0	0	0	0	0	0	0	0	0	0	0	0	0	0	4.06725e-06	4.06725e-06	0	0	0	0	0	0	0	0	0	0	0	0	0	0
1748	1	11570	115690000	115700000	0	0	0	0	0	0	0	0	0	0	0	0	0	0	0	0	0	0	0	0	0	0	0	0	0	0	0	0	0	0	0	0	0	0	0	0	0	0	0	0	0	0	0	0	0
1749	1	11571	115700000	115710000	0	0	0	0	0	0	3	0	0	0	0	0	0	0	0	0	3.49948e-05	0	0	0	0	0	0	0	0	0	0	0	1.83497e-06	0	1.83497e-06	0	0	0	0	0	0	0	0	0	0	0	0	0	0
1750	1	11572	115710000	115720000	0	0	0	2	0	0	0	0	0	3	0	0	0	1.04224e-05	0	0	0	0	0	0.000442347	0	0	0	5.81928e-05	0	0	0	0	0	2.7115e-06	6.09043e-05	0	0	0	0	0	0	0	0	0	0	0	0	0	0
1751	1	11573	115720000	115730000	0	0	0	0	0	0	0	0	0	0	0	0	0	0	0	0	0	0	0	0	0	0	0	0	0	0	0	0	0	0	0	0	0	0	0	0	0	0	0	0	0	0	0	0	0
1752	1	11574	115730000	115740000	0	0	0	1	0	0	0	0	0	0	0	0	0	5.21118e-06	0	0	0	0	0	0	0	0	0	0	0	0	0	0	0	1.35575e-06	1.35575e-06	0	0	0	0	0	0	0	0	0	0	0	0	0	0
1753	1	11575	115740000	115750000	0	0	0	3	0	0	0	0	0	0	0	0	0	1.56335e-05	0	0	0	0	0	0	0	0	0	0	0	0	0	0	0	4.06725e-06	4.06725e-06	0	0	0	0	0	0	0	0	0	0	0	0	0	0
1754	1	11576	115750000	115760000	0	0	0	0	0	2	0	0	0	0	0	0	0	0	0	2.79357e-05	0	0	0	0	0	0	0	0	0	0	0	1.03578e-06	0	0	1.03578e-06	0	0	0	0	0	0	0	0	0	0	0	0	0	0
1755	1	11577	115760000	115770000	0	0	0	0	0	2	0	0	0	0	0	0	0	0	0	2.79357e-05	0	0	0	0	0	0	0	0	0	0	0	1.03578e-06	0	0	1.03578e-06	0	0	0	0	0	0	0	0	0	0	0	0	0	0
1756	1	11578	115770000	115780000	0	0	0	0	0	0	2	0	0	0	0	0	0	0	0	0	2.33299e-05	0	0	0	0	0	0	0	0	0	0	0	1.22332e-06	0	1.22332e-06	0	0	0	0	0	0	0	0	0	0	0	0	0	0
1757	1	11579	115780000	115790000	0	0	0	2	0	0	0	0	0	0	0	0	0	1.04224e-05	0	0	0	0	0	0	0	0	0	0	0	0	0	0	0	2.7115e-06	2.7115e-06	0	0	0	0	0	0	0	0	0	0	0	0	0	0
1758	1	1158	11570000	11580000	0	0	0	4	0	0	2	0	0	0	0	0	0	2.08447e-05	0	0	2.33299e-05	0	0	0	0	0	0	0	0	0	0	0	1.22332e-06	5.42299e-06	6.64631e-06	0	0	0	0	0	0	0	0	0	0	0	0	0	0
1759	1	11580	115790000	115800000	0	0	0	1	0	0	0	0	2	0	0	0	0	5.21118e-06	0	0	0	0	3.65303e-05	0	0	0	0	0	0	0	1.31478e-06	0	0	1.35575e-06	2.67052e-06	0	0	0	0	0	0	0	0	0	0	0	0	0	0
1760	1	11581	115800000	115810000	0	0	0	0	0	0	0	0	0	0	0	0	0	0	0	0	0	0	0	0	0	0	0	0	0	0	0	0	0	0	0	0	0	0	0	0	0	0	0	0	0	0	0	0	0
1761	1	11582	115810000	115820000	0	0	0	1	0	0	1	0	0	0	0	0	0	5.21118e-06	0	0	1.16649e-05	0	0	0	0	0	0	0	0	0	0	0	6.11658e-07	1.35575e-06	1.96741e-06	0	0	0	0	0	0	0	0	0	0	0	0	0	0
1762	1	11583	115820000	115830000	0	0	0	0	0	0	0	0	0	0	0	0	0	0	0	0	0	0	0	0	0	0	0	0	0	0	0	0	0	0	0	0	0	0	0	0	0	0	0	0	0	0	0	0	0
1763	1	11584	115830000	115840000	0	0	0	0	0	0	0	0	0	0	0	0	0	0	0	0	0	0	0	0	0	0	0	0	0	0	0	0	0	0	0	0	0	0	0	0	0	0	0	0	0	0	0	0	0
1764	1	11585	115840000	115850000	0	0	0	0	0	0	0	0	0	0	0	0	0	0	0	0	0	0	0	0	0	0	0	0	0	0	0	0	0	0	0	0	0	0	0	0	0	0	0	0	0	0	0	0	0
1765	1	11586	115850000	115860000	0	0	0	0	0	0	2	0	0	0	0	0	0	0	0	0	2.33299e-05	0	0	0	0	0	0	0	0	0	0	0	1.22332e-06	0	1.22332e-06	0	0	0	0	0	0	0	0	0	0	0	0	0	0
1766	1	11587	115860000	115870000	0	0	0	0	0	0	0	0	0	0	0	0	0	0	0	0	0	0	0	0	0	0	0	0	0	0	0	0	0	0	0	0	0	0	0	0	0	0	0	0	0	0	0	0	0
1767	1	11588	115870000	115880000	0	0	0	3	0	0	0	0	0	0	0	0	0	1.56335e-05	0	0	0	0	0	0	0	0	0	0	0	0	0	0	0	4.06725e-06	4.06725e-06	0	0	0	0	0	0	0	0	0	0	0	0	0	0
1768	1	11589	115880000	115890000	0	0	0	1	0	0	0	0	0	0	0	0	0	5.21118e-06	0	0	0	0	0	0	0	0	0	0	0	0	0	0	0	1.35575e-06	1.35575e-06	0	0	0	0	0	0	0	0	0	0	0	0	0	0
1769	1	1159	11580000	11590000	0	0	0	0	0	0	0	0	0	0	0	0	0	0	0	0	0	0	0	0	0	0	0	0	0	0	0	0	0	0	0	0	0	0	0	0	0	0	0	0	0	0	0	0	0
1770	1	11590	115890000	115900000	0	0	0	0	0	2	0	0	0	0	0	0	0	0	0	2.79357e-05	0	0	0	0	0	0	0	0	0	0	0	1.03578e-06	0	0	1.03578e-06	0	0	0	0	0	0	0	0	0	0	0	0	0	0
1771	1	11591	115900000	115910000	0	0	0	0	0	0	0	0	0	0	0	0	0	0	0	0	0	0	0	0	0	0	0	0	0	0	0	0	0	0	0	0	0	0	0	0	0	0	0	0	0	0	0	0	0
1772	1	11592	115910000	115920000	0	0	0	0	0	8	0	0	0	0	0	0	0	0	0	0.000111743	0	0	0	0	0	0	0	0	0	0	0	4.14312e-06	0	0	4.14312e-06	0	0	0	0	0	1	0	0	0	0	0	0	0	0
1773	1	11593	115920000	115930000	2	0	0	1	0	0	0	0	0	0	0.000859845	0	0	5.21118e-06	0	0	0	0	0	0	0.000122454	0	0	0	0	0	0	0	0	1.35575e-06	0.00012381	0	0	0	0	0	0	0	0	0	0	0	0	0	0
1774	1	11594	115930000	115940000	0	0	0	0	0	0	0	0	0	0	0	0	0	0	0	0	0	0	0	0	0	0	0	0	0	0	0	0	0	0	0	0	0	0	0	0	0	0	0	0	0	0	0	0	0
1775	1	11595	115940000	115950000	0	0	0	0	0	0	4	0	0	0	0	0	0	0	0	0	4.66597e-05	0	0	0	0	0	0	0	0	0	0	0	2.44663e-06	0	2.44663e-06	0	0	0	0	0	0	0	0	0	0	0	0	0	0
1776	1	11596	115950000	115960000	0	0	0	0	0	0	0	0	0	0	0	0	0	0	0	0	0	0	0	0	0	0	0	0	0	0	0	0	0	0	0	0	0	0	0	0	0	0	0	0	0	0	0	0	0
1777	1	11597	115960000	115970000	0	0	0	1	0	0	0	1	1	0	0	0	0	5.21118e-06	0	0	0	2.0859e-05	1.82652e-05	0	0	0	0	0	0	3.59838e-06	6.57388e-07	0	0	1.35575e-06	5.61152e-06	0	0	0	0	0	0	0	0	0	0	0	0	0	0
1778	1	11598	115970000	115980000	0	0	0	0	0	0	0	0	0	0	0	0	0	0	0	0	0	0	0	0	0	0	0	0	0	0	0	0	0	0	0	0	0	0	0	0	0	0	0	0	0	0	0	0	0
1779	1	11599	115980000	115990000	0	0	0	0	0	0	0	0	0	0	0	0	0	0	0	0	0	0	0	0	0	0	0	0	0	0	0	0	0	0	0	0	0	0	0	0	0	0	0	0	0	0	0	0	0
1780	1	116	1150000	1160000	0	0	0	1	0	0	2	0	1	0	0	0	0	5.21118e-06	0	0	2.33299e-05	0	1.82652e-05	0	0	0	0	0	0	0	6.57388e-07	0	1.22332e-06	1.35575e-06	3.23645e-06	0	0	0	0	0	0	0	0	0	0	0	0	0	0
1781	1	1160	11590000	11600000	0	0	0	0	0	0	0	0	0	0	0	0	0	0	0	0	0	0	0	0	0	0	0	0	0	0	0	0	0	0	0	0	0	0	0	0	0	0	0	0	0	0	0	0	0
1782	1	11600	115990000	116000000	0	0	0	1	0	0	0	1	0	0	0	0	0	5.21118e-06	0	0	0	2.0859e-05	0	0	0	0	0	0	0	3.59838e-06	0	0	0	1.35575e-06	4.95413e-06	0	0	0	0	0	0	0	0	0	0	0	0	0	0
1783	1	11601	116000000	116010000	0	0	0	3	0	0	1	0	0	0	0	0	0	1.56335e-05	0	0	1.16649e-05	0	0	0	0	0	0	0	0	0	0	0	6.11658e-07	4.06725e-06	4.6789e-06	0	0	0	0	0	0	0	0	0	0	0	0	0	0
1784	1	11602	116010000	116020000	0	0	0	1	0	0	0	0	0	0	0	0	0	5.21118e-06	0	0	0	0	0	0	0	0	0	0	0	0	0	0	0	1.35575e-06	1.35575e-06	0	0	0	0	0	0	0	0	0	0	0	0	0	0
1785	1	11603	116020000	116030000	0	0	0	0	0	0	1	0	0	0	0	0	0	0	0	0	1.16649e-05	0	0	0	0	0	0	0	0	0	0	0	6.11658e-07	0	6.11658e-07	0	0	0	0	0	0	0	0	0	0	0	0	0	0
1786	1	11604	116030000	116040000	0	0	0	2	0	0	0	0	0	0	0	0	0	1.04224e-05	0	0	0	0	0	0	0	0	0	0	0	0	0	0	0	2.7115e-06	2.7115e-06	0	0	0	0	0	0	0	0	0	0	0	0	0	0
1787	1	11605	116040000	116050000	0	0	0	1	0	2	0	0	0	0	0	0	0	5.21118e-06	0	2.79357e-05	0	0	0	0	0	0	0	0	0	0	0	1.03578e-06	0	1.35575e-06	2.39153e-06	0	0	0	0	0	0	0	0	0	0	0	0	0	0
1788	1	11606	116050000	116060000	0	0	0	1	0	1	0	0	0	0	0	0	0	5.21118e-06	0	1.39678e-05	0	0	0	0	0	0	0	0	0	0	0	5.17889e-07	0	1.35575e-06	1.87364e-06	0	0	0	0	0	0	0	0	0	0	0	0	0	0
1789	1	11607	116060000	116070000	0	0	0	0	0	1	0	0	0	0	0	0	0	0	0	1.39678e-05	0	0	0	0	0	0	0	0	0	0	0	5.17889e-07	0	0	5.17889e-07	0	0	0	0	0	0	0	0	0	0	0	0	0	0
1790	1	11608	116070000	116080000	0	0	0	0	0	1	1	0	0	0	0	0	0	0	0	1.39678e-05	1.16649e-05	0	0	0	0	0	0	0	0	0	0	5.17889e-07	6.11658e-07	0	1.12955e-06	0	0	0	0	0	0	0	0	0	0	0	0	0	0
1791	1	11609	116080000	116090000	0	0	0	0	0	1	0	0	0	0	0	0	0	0	0	1.39678e-05	0	0	0	0	0	0	0	0	0	0	0	5.17889e-07	0	0	5.17889e-07	0	0	0	0	0	0	0	0	0	0	0	0	0	0
1792	1	1161	11600000	11610000	0	0	0	2	0	0	0	0	0	0	0	0	0	1.04224e-05	0	0	0	0	0	0	0	0	0	0	0	0	0	0	0	2.7115e-06	2.7115e-06	0	0	0	0	0	0	0	0	0	0	0	0	0	0
1793	1	11610	116090000	116100000	0	0	0	0	0	0	0	0	0	0	0	0	0	0	0	0	0	0	0	0	0	0	0	0	0	0	0	0	0	0	0	0	0	0	0	0	0	0	0	0	0	0	0	0	0
1794	1	11611	116100000	116110000	0	0	0	0	0	1	0	0	0	0	0	0	0	0	0	1.39678e-05	0	0	0	0	0	0	0	0	0	0	0	5.17889e-07	0	0	5.17889e-07	0	0	0	0	0	0	0	0	0	0	0	0	0	0
1795	1	11612	116110000	116120000	0	0	0	0	0	0	0	1	0	0	0	0	0	0	0	0	0	2.0859e-05	0	0	0	0	0	0	0	3.59838e-06	0	0	0	0	3.59838e-06	0	0	0	0	0	0	0	0	0	0	0	0	0	0
1796	1	11613	116120000	116130000	0	0	0	1	0	0	0	0	0	0	0	0	0	5.21118e-06	0	0	0	0	0	0	0	0	0	0	0	0	0	0	0	1.35575e-06	1.35575e-06	0	0	0	0	0	0	0	0	0	0	0	0	0	0
1797	1	11614	116130000	116140000	0	0	0	0	0	0	0	0	0	0	0	0	0	0	0	0	0	0	0	0	0	0	0	0	0	0	0	0	0	0	0	0	0	0	0	0	0	0	0	0	0	0	0	0	0
1798	1	11615	116140000	116150000	0	0	0	4	0	2	0	0	0	0	0	0	0	2.08447e-05	0	2.79357e-05	0	0	0	0	0	0	0	0	0	0	0	1.03578e-06	0	5.42299e-06	6.45877e-06	0	0	0	0	0	0	0	0	0	0	0	0	0	0
1799	1	11616	116150000	116160000	0	0	0	2	0	0	0	0	0	0	0	0	0	1.04224e-05	0	0	0	0	0	0	0	0	0	0	0	0	0	0	0	2.7115e-06	2.7115e-06	0	0	0	0	0	0	0	0	0	0	0	0	0	0
1800	1	11617	116160000	116170000	0	0	0	1	0	2	0	0	0	0	0	0	0	5.21118e-06	0	2.79357e-05	0	0	0	0	0	0	0	0	0	0	0	1.03578e-06	0	1.35575e-06	2.39153e-06	0	0	0	0	0	0	0	0	0	0	0	0	0	0
1801	1	11618	116170000	116180000	0	0	0	0	0	0	0	0	0	0	0	0	0	0	0	0	0	0	0	0	0	0	0	0	0	0	0	0	0	0	0	0	0	0	0	0	0	0	0	0	0	0	0	0	0
1802	1	11619	116180000	116190000	0	0	0	2	0	0	0	0	0	0	0	0	0	1.04224e-05	0	0	0	0	0	0	0	0	0	0	0	0	0	0	0	2.7115e-06	2.7115e-06	0	0	0	0	0	0	0	0	0	0	0	0	0	0
1803	1	1162	11610000	11620000	0	0	0	0	0	0	0	0	0	0	0	0	0	0	0	0	0	0	0	0	0	0	0	0	0	0	0	0	0	0	0	0	0	0	0	0	0	0	0	0	0	0	0	0	0
1804	1	11620	116190000	116200000	0	0	0	0	0	0	0	0	0	0	0	0	0	0	0	0	0	0	0	0	0	0	0	0	0	0	0	0	0	0	0	0	0	0	0	0	0	0	0	0	0	0	0	0	0
1805	1	11621	116200000	116210000	0	0	0	0	0	0	0	0	0	0	0	0	0	0	0	0	0	0	0	0	0	0	0	0	0	0	0	0	0	0	0	0	0	0	0	0	0	0	0	0	0	0	0	0	0
1806	1	11622	116210000	116220000	0	0	0	0	0	0	1	0	0	0	0	0	0	0	0	0	1.16649e-05	0	0	0	0	0	0	0	0	0	0	0	6.11658e-07	0	6.11658e-07	0	0	0	0	0	0	0	0	0	0	0	0	0	0
1807	1	11623	116220000	116230000	0	0	0	0	0	0	2	0	0	0	0	0	0	0	0	0	2.33299e-05	0	0	0	0	0	0	0	0	0	0	0	1.22332e-06	0	1.22332e-06	0	0	0	0	0	0	0	0	0	0	0	0	0	0
1808	1	11624	116230000	116240000	0	0	0	0	0	0	0	0	0	0	0	0	0	0	0	0	0	0	0	0	0	0	0	0	0	0	0	0	0	0	0	0	0	0	0	0	0	0	0	0	0	0	0	0	0
1809	1	11625	116240000	116250000	0	0	0	0	0	0	0	0	0	0	0	0	0	0	0	0	0	0	0	0	0	0	0	0	0	0	0	0	0	0	0	0	0	0	0	0	0	0	0	0	0	0	0	0	0
1810	1	11626	116250000	116260000	0	0	0	0	0	0	0	1	0	0	0	0	0	0	0	0	0	2.0859e-05	0	0	0	0	0	0	0	3.59838e-06	0	0	0	0	3.59838e-06	0	0	0	0	0	0	0	0	0	0	0	0	0	0
1811	1	11627	116260000	116270000	0	0	0	0	0	0	0	0	0	0	0	0	0	0	0	0	0	0	0	0	0	0	0	0	0	0	0	0	0	0	0	0	0	0	0	0	0	0	0	0	0	0	0	0	0
1812	1	11628	116270000	116280000	0	0	0	0	0	2	0	0	0	0	0	0	0	0	0	2.79357e-05	0	0	0	0	0	0	0	0	0	0	0	1.03578e-06	0	0	1.03578e-06	0	0	0	0	0	0	0	0	0	0	0	0	0	0
1813	1	11629	116280000	116290000	0	0	0	0	0	1	0	0	0	0	0	0	0	0	0	1.39678e-05	0	0	0	0	0	0	0	0	0	0	0	5.17889e-07	0	0	5.17889e-07	0	0	0	0	0	0	0	0	0	0	0	0	0	0
1814	1	1163	11620000	11630000	0	0	0	0	0	0	0	0	0	0	0	0	0	0	0	0	0	0	0	0	0	0	0	0	0	0	0	0	0	0	0	0	0	0	0	0	0	0	0	0	0	0	0	0	0
1815	1	11630	116290000	116300000	0	0	0	0	0	2	2	0	0	0	0	0	0	0	0	2.79357e-05	2.33299e-05	0	0	0	0	0	0	0	0	0	0	1.03578e-06	1.22332e-06	0	2.2591e-06	0	0	0	0	0	0	0	0	0	0	0	0	0	0
1816	1	11631	116300000	116310000	0	0	0	1	0	0	0	0	3	1	0	0	0	5.21118e-06	0	0	0	0	5.47955e-05	0.000147449	0	0	0	1.93976e-05	0	0	1.97216e-06	0	0	1.35575e-06	2.27255e-05	0	0	0	0	0	0	0	0	0	0	0	0	0	0
1817	1	11632	116310000	116320000	0	0	0	0	0	1	0	0	1	0	0	0	0	0	0	1.39678e-05	0	0	1.82652e-05	0	0	0	0	0	0	0	6.57388e-07	5.17889e-07	0	0	1.17528e-06	0	0	0	0	0	0	0	0	0	0	0	0	0	0
1818	1	11633	116320000	116330000	0	0	0	1	0	0	0	0	0	0	0	0	0	5.21118e-06	0	0	0	0	0	0	0	0	0	0	0	0	0	0	0	1.35575e-06	1.35575e-06	0	0	0	0	0	0	0	0	0	0	0	0	0	0
1819	1	11634	116330000	116340000	0	0	0	0	0	0	0	0	0	0	0	0	0	0	0	0	0	0	0	0	0	0	0	0	0	0	0	0	0	0	0	0	0	0	0	0	0	0	0	0	0	0	0	0	0
1820	1	11635	116340000	116350000	0	0	0	1	0	0	0	0	0	0	0	0	0	5.21118e-06	0	0	0	0	0	0	0	0	0	0	0	0	0	0	0	1.35575e-06	1.35575e-06	0	0	0	0	0	0	0	0	0	0	0	0	0	0
1821	1	11636	116350000	116360000	0	0	0	4	1	0	0	0	0	0	0	0	0	2.08447e-05	4.48209e-05	0	0	0	0	0	0	0	0	0	5.43748e-06	0	0	0	0	5.42299e-06	1.08605e-05	0	0	0	0	0	0	0	0	0	0	0	0	0	0
1822	1	11637	116360000	116370000	0	0	0	1	0	0	0	0	0	0	0	0	0	5.21118e-06	0	0	0	0	0	0	0	0	0	0	0	0	0	0	0	1.35575e-06	1.35575e-06	0	0	0	0	0	0	0	0	0	0	0	0	0	0
1823	1	11638	116370000	116380000	0	0	0	0	0	0	0	0	0	0	0	0	0	0	0	0	0	0	0	0	0	0	0	0	0	0	0	0	0	0	0	0	0	0	0	0	0	0	0	0	0	0	0	0	0
1824	1	11639	116380000	116390000	0	0	0	4	1	0	0	0	0	0	0	0	0	2.08447e-05	4.48209e-05	0	0	0	0	0	0	0	0	0	5.43748e-06	0	0	0	0	5.42299e-06	1.08605e-05	0	0	0	0	0	0	0	0	0	0	0	0	0	0
1825	1	1164	11630000	11640000	0	0	0	0	0	0	0	0	0	0	0	0	0	0	0	0	0	0	0	0	0	0	0	0	0	0	0	0	0	0	0	0	0	0	0	0	0	0	0	0	0	0	0	0	0
1826	1	11640	116390000	116400000	0	0	0	1	0	0	0	0	0	0	0	0	0	5.21118e-06	0	0	0	0	0	0	0	0	0	0	0	0	0	0	0	1.35575e-06	1.35575e-06	0	0	0	0	0	0	0	0	0	0	0	0	0	0
1827	1	11641	116400000	116410000	0	0	0	0	0	0	0	0	0	0	0	0	0	0	0	0	0	0	0	0	0	0	0	0	0	0	0	0	0	0	0	0	0	0	0	0	0	0	0	0	0	0	0	0	0
1828	1	11642	116410000	116420000	0	0	0	0	0	1	0	0	0	0	0	0	0	0	0	1.39678e-05	0	0	0	0	0	0	0	0	0	0	0	5.17889e-07	0	0	5.17889e-07	0	0	0	0	0	0	0	0	0	0	0	0	0	0
1829	1	11643	116420000	116430000	0	0	0	3	0	0	0	0	0	0	0	0	0	1.56335e-05	0	0	0	0	0	0	0	0	0	0	0	0	0	0	0	4.06725e-06	4.06725e-06	0	0	0	0	0	0	0	0	0	0	0	0	0	0
1830	1	11644	116430000	116440000	0	0	0	1	0	0	0	0	0	0	0	0	0	5.21118e-06	0	0	0	0	0	0	0	0	0	0	0	0	0	0	0	1.35575e-06	1.35575e-06	0	0	0	0	0	0	0	0	0	0	0	0	0	0
1831	1	11645	116440000	116450000	0	0	0	3	0	0	1	0	0	0	0	0	0	1.56335e-05	0	0	1.16649e-05	0	0	0	0	0	0	0	0	0	0	0	6.11658e-07	4.06725e-06	4.6789e-06	0	0	0	0	0	0	0	0	0	0	0	0	0	0
1832	1	11646	116450000	116460000	0	0	0	1	0	0	0	0	0	0	0	0	0	5.21118e-06	0	0	0	0	0	0	0	0	0	0	0	0	0	0	0	1.35575e-06	1.35575e-06	0	0	0	0	0	0	0	0	0	0	0	0	0	0
1833	1	11647	116460000	116470000	0	0	0	1	0	0	1	0	0	0	0	0	0	5.21118e-06	0	0	1.16649e-05	0	0	0	0	0	0	0	0	0	0	0	6.11658e-07	1.35575e-06	1.96741e-06	0	0	0	0	0	0	0	0	0	0	0	0	0	0
1834	1	11648	116470000	116480000	0	0	0	3	0	0	0	0	0	0	0	0	0	1.56335e-05	0	0	0	0	0	0	0	0	0	0	0	0	0	0	0	4.06725e-06	4.06725e-06	0	0	0	0	0	0	0	0	0	0	0	0	0	0
1835	1	11649	116480000	116490000	0	0	0	1	0	0	0	1	0	0	0	0	0	5.21118e-06	0	0	0	2.0859e-05	0	0	0	0	0	0	0	3.59838e-06	0	0	0	1.35575e-06	4.95413e-06	0	0	0	0	0	0	0	0	0	0	0	0	0	0
1836	1	1165	11640000	11650000	0	0	0	0	0	0	0	0	0	0	0	0	0	0	0	0	0	0	0	0	0	0	0	0	0	0	0	0	0	0	0	0	0	0	0	0	0	0	0	0	0	0	0	0	0
1837	1	11650	116490000	116500000	0	0	0	0	0	0	0	0	0	0	0	0	0	0	0	0	0	0	0	0	0	0	0	0	0	0	0	0	0	0	0	0	0	0	0	0	0	0	0	0	0	0	0	0	0
1838	1	11651	116500000	116510000	0	0	0	0	0	0	0	0	0	0	0	0	0	0	0	0	0	0	0	0	0	0	0	0	0	0	0	0	0	0	0	0	0	0	0	0	0	0	0	0	0	0	0	0	0
1839	1	11652	116510000	116520000	0	0	0	2	0	0	0	0	0	0	0	0	0	1.04224e-05	0	0	0	0	0	0	0	0	0	0	0	0	0	0	0	2.7115e-06	2.7115e-06	0	0	0	0	0	0	0	0	0	0	0	0	0	0
1840	1	11653	116520000	116530000	0	0	0	1	0	0	0	2	0	0	0	0	0	5.21118e-06	0	0	0	4.17179e-05	0	0	0	0	0	0	0	7.19677e-06	0	0	0	1.35575e-06	8.55251e-06	0	0	0	0	0	0	0	0	0	0	0	0	0	0
1841	1	11654	116530000	116540000	0	0	0	2	0	0	0	0	0	0	0	0	0	1.04224e-05	0	0	0	0	0	0	0	0	0	0	0	0	0	0	0	2.7115e-06	2.7115e-06	0	0	0	0	0	0	0	0	0	0	0	0	0	0
1842	1	11655	116540000	116550000	0	0	0	0	0	0	1	0	0	0	0	0	0	0	0	0	1.16649e-05	0	0	0	0	0	0	0	0	0	0	0	6.11658e-07	0	6.11658e-07	0	0	0	0	0	0	0	0	0	0	0	0	0	0
1843	1	11656	116550000	116560000	0	0	0	2	0	0	0	1	0	0	0	0	0	1.04224e-05	0	0	0	2.0859e-05	0	0	0	0	0	0	0	3.59838e-06	0	0	0	2.7115e-06	6.30988e-06	0	0	0	0	0	0	0	0	0	0	0	0	0	0
1844	1	11657	116560000	116570000	0	0	0	2	0	0	0	0	0	0	0	0	0	1.04224e-05	0	0	0	0	0	0	0	0	0	0	0	0	0	0	0	2.7115e-06	2.7115e-06	0	0	0	0	0	0	0	0	0	0	0	0	0	0
1845	1	11658	116570000	116580000	0	0	0	0	0	0	0	0	0	0	0	0	0	0	0	0	0	0	0	0	0	0	0	0	0	0	0	0	0	0	0	0	0	0	0	0	0	0	0	0	0	0	0	0	0
1846	1	11659	116580000	116590000	0	0	0	0	0	3	0	0	0	0	0	0	0	0	0	4.19035e-05	0	0	0	0	0	0	0	0	0	0	0	1.55367e-06	0	0	1.55367e-06	0	0	0	0	0	0	0	0	0	0	0	0	0	0
1847	1	1166	11650000	11660000	0	0	0	0	0	0	1	0	0	0	0	0	0	0	0	0	1.16649e-05	0	0	0	0	0	0	0	0	0	0	0	6.11658e-07	0	6.11658e-07	0	0	0	0	0	0	0	0	0	0	0	0	0	0
1848	1	11660	116590000	116600000	0	0	0	0	0	0	0	0	0	0	0	0	0	0	0	0	0	0	0	0	0	0	0	0	0	0	0	0	0	0	0	0	0	0	0	0	0	0	0	0	0	0	0	0	0
1849	1	11661	116600000	116610000	0	0	0	2	0	0	0	0	0	0	0	0	0	1.04224e-05	0	0	0	0	0	0	0	0	0	0	0	0	0	0	0	2.7115e-06	2.7115e-06	0	0	0	0	0	0	0	0	0	0	0	0	0	0
1850	1	11662	116610000	116620000	0	0	0	0	0	0	0	0	1	0	0	0	0	0	0	0	0	0	1.82652e-05	0	0	0	0	0	0	0	6.57388e-07	0	0	0	6.57388e-07	0	0	0	0	0	0	0	0	0	0	0	0	0	0
1851	1	11663	116620000	116630000	0	0	0	0	0	0	0	0	0	0	0	0	0	0	0	0	0	0	0	0	0	0	0	0	0	0	0	0	0	0	0	0	0	0	0	0	0	0	0	0	0	0	0	0	0
1852	1	11664	116630000	116640000	0	0	0	2	0	0	0	0	2	0	0	0	0	1.04224e-05	0	0	0	0	3.65303e-05	0	0	0	0	0	0	0	1.31478e-06	0	0	2.7115e-06	4.02627e-06	0	0	0	0	0	0	0	0	0	0	0	0	0	0
1853	1	11665	116640000	116650000	0	0	0	1	0	0	0	0	0	0	0	0	0	5.21118e-06	0	0	0	0	0	0	0	0	0	0	0	0	0	0	0	1.35575e-06	1.35575e-06	0	0	0	0	0	0	0	0	0	0	0	0	0	0
1854	1	11666	116650000	116660000	0	0	0	0	0	0	0	0	0	0	0	0	0	0	0	0	0	0	0	0	0	0	0	0	0	0	0	0	0	0	0	0	0	0	0	0	0	0	0	0	0	0	0	0	0
1855	1	11667	116660000	116670000	0	0	0	0	0	0	0	0	0	0	0	0	0	0	0	0	0	0	0	0	0	0	0	0	0	0	0	0	0	0	0	0	0	0	0	0	0	0	0	0	0	0	0	0	0
1856	1	11668	116670000	116680000	0	0	0	0	0	0	2	0	0	0	0	0	0	0	0	0	2.33299e-05	0	0	0	0	0	0	0	0	0	0	0	1.22332e-06	0	1.22332e-06	0	0	0	0	0	0	0	0	0	0	0	0	0	0
1857	1	11669	116680000	116690000	0	0	0	0	0	0	0	0	0	0	0	0	0	0	0	0	0	0	0	0	0	0	0	0	0	0	0	0	0	0	0	0	0	0	0	0	0	0	0	0	0	0	0	0	0
1858	1	1167	11660000	11670000	0	0	0	1	0	0	0	0	0	0	0	0	0	5.21118e-06	0	0	0	0	0	0	0	0	0	0	0	0	0	0	0	1.35575e-06	1.35575e-06	0	0	0	0	0	0	0	0	0	0	0	0	0	0
1859	1	11670	116690000	116700000	0	0	0	0	0	0	0	0	0	0	0	0	0	0	0	0	0	0	0	0	0	0	0	0	0	0	0	0	0	0	0	0	0	0	0	0	0	0	0	0	0	0	0	0	0
1860	1	11671	116700000	116710000	0	0	0	1	0	1	0	0	0	0	0	0	0	5.21118e-06	0	1.39678e-05	0	0	0	0	0	0	0	0	0	0	0	5.17889e-07	0	1.35575e-06	1.87364e-06	0	0	0	0	0	0	0	0	0	0	0	0	0	0
1861	1	11672	116710000	116720000	0	0	0	1	0	2	0	0	0	0	0	0	0	5.21118e-06	0	2.79357e-05	0	0	0	0	0	0	0	0	0	0	0	1.03578e-06	0	1.35575e-06	2.39153e-06	0	0	0	0	0	0	0	0	0	0	0	0	0	0
1862	1	11673	116720000	116730000	0	0	0	0	0	0	0	0	2	0	0	0	0	0	0	0	0	0	3.65303e-05	0	0	0	0	0	0	0	1.31478e-06	0	0	0	1.31478e-06	0	0	0	0	0	0	0	0	0	0	0	0	0	0
1863	1	11674	116730000	116740000	0	0	0	2	0	0	0	0	0	0	0	0	0	1.04224e-05	0	0	0	0	0	0	0	0	0	0	0	0	0	0	0	2.7115e-06	2.7115e-06	0	0	0	0	0	0	0	0	0	0	0	0	0	0
1864	1	11675	116740000	116750000	0	0	0	0	0	0	0	0	1	0	0	0	0	0	0	0	0	0	1.82652e-05	0	0	0	0	0	0	0	6.57388e-07	0	0	0	6.57388e-07	0	0	0	0	0	0	0	0	0	0	0	0	0	0
1865	1	11676	116750000	116760000	0	0	0	0	0	0	0	0	0	0	0	0	0	0	0	0	0	0	0	0	0	0	0	0	0	0	0	0	0	0	0	0	0	0	0	0	0	0	0	0	0	0	0	0	0
1866	1	11677	116760000	116770000	0	0	0	1	0	1	0	0	0	0	0	0	0	5.21118e-06	0	1.39678e-05	0	0	0	0	0	0	0	0	0	0	0	5.17889e-07	0	1.35575e-06	1.87364e-06	0	0	0	0	0	0	0	0	0	0	0	0	0	0
1867	1	11678	116770000	116780000	0	0	0	2	0	0	0	0	0	0	0	0	0	1.04224e-05	0	0	0	0	0	0	0	0	0	0	0	0	0	0	0	2.7115e-06	2.7115e-06	0	0	0	0	0	0	0	0	0	0	0	0	0	0
1868	1	11679	116780000	116790000	0	0	0	2	0	0	0	0	1	0	0	0	0	1.04224e-05	0	0	0	0	1.82652e-05	0	0	0	0	0	0	0	6.57388e-07	0	0	2.7115e-06	3.36888e-06	0	0	0	0	0	0	0	0	0	0	0	0	0	0
1869	1	1168	11670000	11680000	0	0	0	0	0	0	0	0	0	0	0	0	0	0	0	0	0	0	0	0	0	0	0	0	0	0	0	0	0	0	0	0	0	0	0	0	0	0	0	0	0	0	0	0	0
1870	1	11680	116790000	116800000	0	0	0	1	0	1	1	0	0	0	0	0	0	5.21118e-06	0	1.39678e-05	1.16649e-05	0	0	0	0	0	0	0	0	0	0	5.17889e-07	6.11658e-07	1.35575e-06	2.4853e-06	0	0	0	0	0	0	0	0	0	0	0	0	0	0
1871	1	11681	116800000	116810000	0	0	0	2	0	0	0	0	0	0	0	0	0	1.04224e-05	0	0	0	0	0	0	0	0	0	0	0	0	0	0	0	2.7115e-06	2.7115e-06	0	0	0	0	0	0	0	0	0	0	0	0	0	0
1872	1	11682	116810000	116820000	0	0	0	3	0	0	1	0	0	0	0	0	0	1.56335e-05	0	0	1.16649e-05	0	0	0	0	0	0	0	0	0	0	0	6.11658e-07	4.06725e-06	4.6789e-06	0	0	0	0	0	0	0	0	0	0	0	0	0	0
1873	1	11683	116820000	116830000	0	0	0	1	0	2	1	0	0	0	0	0	0	5.21118e-06	0	2.79357e-05	1.16649e-05	0	0	0	0	0	0	0	0	0	0	1.03578e-06	6.11658e-07	1.35575e-06	3.00319e-06	0	0	0	0	0	0	0	0	0	0	0	0	0	0
1874	1	11684	116830000	116840000	0	0	0	1	0	4	3	0	0	0	0	0	0	5.21118e-06	0	5.58714e-05	3.49948e-05	0	0	0	0	0	0	0	0	0	0	2.07156e-06	1.83497e-06	1.35575e-06	5.26228e-06	0	0	0	0	0	0	0	0	0	0	0	0	0	0
1875	1	11685	116840000	116850000	0	0	0	2	0	0	0	0	0	0	0	0	0	1.04224e-05	0	0	0	0	0	0	0	0	0	0	0	0	0	0	0	2.7115e-06	2.7115e-06	0	0	0	0	0	0	0	0	0	0	0	0	0	0
1876	1	11686	116850000	116860000	0	0	0	1	1	2	1	0	0	0	0	0	0	5.21118e-06	4.48209e-05	2.79357e-05	1.16649e-05	0	0	0	0	0	0	0	5.43748e-06	0	0	1.03578e-06	6.11658e-07	1.35575e-06	8.44066e-06	0	0	0	0	0	0	0	0	0	0	0	0	0	0
1877	1	11687	116860000	116870000	0	0	0	5	0	0	0	0	0	0	0	0	0	2.60559e-05	0	0	0	0	0	0	0	0	0	0	0	0	0	0	0	6.77874e-06	6.77874e-06	0	0	0	0	0	0	0	0	0	0	0	0	0	0
1878	1	11688	116870000	116880000	0	0	0	0	0	0	0	0	0	0	0	0	0	0	0	0	0	0	0	0	0	0	0	0	0	0	0	0	0	0	0	0	0	0	0	0	0	0	0	0	0	0	0	0	0
1879	1	11689	116880000	116890000	0	0	0	4	0	0	0	0	0	0	0	0	0	2.08447e-05	0	0	0	0	0	0	0	0	0	0	0	0	0	0	0	5.42299e-06	5.42299e-06	0	0	0	0	0	0	0	0	0	0	0	0	0	0
1880	1	1169	11680000	11690000	0	0	0	0	0	0	1	0	0	0	0	0	0	0	0	0	1.16649e-05	0	0	0	0	0	0	0	0	0	0	0	6.11658e-07	0	6.11658e-07	0	0	0	0	0	0	0	0	0	0	0	0	0	0
1881	1	11690	116890000	116900000	0	0	0	2	0	0	0	0	0	0	0	0	0	1.04224e-05	0	0	0	0	0	0	0	0	0	0	0	0	0	0	0	2.7115e-06	2.7115e-06	0	0	0	0	0	0	0	0	0	0	0	0	0	0
1882	1	11691	116900000	116910000	0	0	0	1	0	0	0	0	0	0	0	0	0	5.21118e-06	0	0	0	0	0	0	0	0	0	0	0	0	0	0	0	1.35575e-06	1.35575e-06	0	0	0	0	0	0	0	0	0	0	0	0	0	0
1883	1	11692	116910000	116920000	0	0	0	0	0	2	0	0	0	0	0	0	0	0	0	2.79357e-05	0	0	0	0	0	0	0	0	0	0	0	1.03578e-06	0	0	1.03578e-06	0	0	0	0	0	0	0	0	0	0	0	0	0	0
1884	1	11693	116920000	116930000	0	0	0	0	0	0	0	0	0	0	0	0	0	0	0	0	0	0	0	0	0	0	0	0	0	0	0	0	0	0	0	0	0	0	0	0	0	0	0	0	0	0	0	0	0
1885	1	11694	116930000	116940000	0	0	0	1	1	0	10	0	3	0	0	0	0	5.21118e-06	4.48209e-05	0	0.000116649	0	5.47955e-05	0	0	0	0	0	5.43748e-06	0	1.97216e-06	0	6.11658e-06	1.35575e-06	1.4882e-05	0	0	0	0	0	0	1	0	0	0	0	0	0	0
1886	1	11695	116940000	116950000	0	0	0	0	0	0	0	0	0	0	0	0	0	0	0	0	0	0	0	0	0	0	0	0	0	0	0	0	0	0	0	0	0	0	0	0	0	0	0	0	0	0	0	0	0
1887	1	11696	116950000	116960000	0	0	0	2	0	0	0	0	0	0	0	0	0	1.04224e-05	0	0	0	0	0	0	0	0	0	0	0	0	0	0	0	2.7115e-06	2.7115e-06	0	0	0	0	0	0	0	0	0	0	0	0	0	0
1888	1	11697	116960000	116970000	0	0	0	0	0	0	0	0	2	0	0	0	0	0	0	0	0	0	3.65303e-05	0	0	0	0	0	0	0	1.31478e-06	0	0	0	1.31478e-06	0	0	0	0	0	0	0	0	0	0	0	0	0	0
1889	1	11698	116970000	116980000	0	0	0	0	0	1	0	0	0	0	0	0	0	0	0	1.39678e-05	0	0	0	0	0	0	0	0	0	0	0	5.17889e-07	0	0	5.17889e-07	0	0	0	0	0	0	0	0	0	0	0	0	0	0
1890	1	11699	116980000	116990000	0	0	0	2	0	2	0	0	0	0	0	0	0	1.04224e-05	0	2.79357e-05	0	0	0	0	0	0	0	0	0	0	0	1.03578e-06	0	2.7115e-06	3.74728e-06	0	0	0	0	0	0	0	0	0	0	0	0	0	0
1891	1	117	1160000	1170000	0	0	0	0	0	0	0	0	2	0	0	0	0	0	0	0	0	0	3.65303e-05	0	0	0	0	0	0	0	1.31478e-06	0	0	0	1.31478e-06	0	0	0	0	0	0	0	0	0	0	0	0	0	0
1892	1	1170	11690000	11700000	0	0	0	3	0	2	0	0	0	0	0	0	0	1.56335e-05	0	2.79357e-05	0	0	0	0	0	0	0	0	0	0	0	1.03578e-06	0	4.06725e-06	5.10302e-06	0	0	0	0	0	0	0	0	0	0	0	0	0	0
1893	1	11700	116990000	117000000	0	0	0	0	0	1	0	0	0	0	0	0	0	0	0	1.39678e-05	0	0	0	0	0	0	0	0	0	0	0	5.17889e-07	0	0	5.17889e-07	0	0	0	0	0	0	0	0	0	0	0	0	0	0
1894	1	11701	117000000	117010000	0	0	0	3	0	2	2	0	0	0	0	0	0	1.56335e-05	0	2.79357e-05	2.33299e-05	0	0	0	0	0	0	0	0	0	0	1.03578e-06	1.22332e-06	4.06725e-06	6.32634e-06	0	0	0	0	0	0	0	0	0	0	0	0	0	0
1895	1	11702	117010000	117020000	0	0	0	1	0	0	0	0	0	0	0	0	0	5.21118e-06	0	0	0	0	0	0	0	0	0	0	0	0	0	0	0	1.35575e-06	1.35575e-06	0	0	0	0	0	0	0	0	0	0	0	0	0	0
1896	1	11703	117020000	117030000	0	0	0	0	0	1	0	0	0	0	0	0	0	0	0	1.39678e-05	0	0	0	0	0	0	0	0	0	0	0	5.17889e-07	0	0	5.17889e-07	0	0	0	0	0	0	0	0	0	0	0	0	0	0
1897	1	11704	117030000	117040000	0	0	0	0	0	1	0	0	0	0	0	0	0	0	0	1.39678e-05	0	0	0	0	0	0	0	0	0	0	0	5.17889e-07	0	0	5.17889e-07	0	0	0	0	0	0	0	0	0	0	0	0	0	0
1898	1	11705	117040000	117050000	0	0	0	0	1	0	0	0	0	0	0	0	0	0	4.48209e-05	0	0	0	0	0	0	0	0	0	5.43748e-06	0	0	0	0	0	5.43748e-06	0	0	0	0	0	0	0	0	0	0	0	0	0	0
1899	1	11706	117050000	117060000	0	0	0	0	0	0	0	0	2	0	0	0	0	0	0	0	0	0	3.65303e-05	0	0	0	0	0	0	0	1.31478e-06	0	0	0	1.31478e-06	0	0	0	0	0	0	0	0	0	0	0	0	0	0
1900	1	11707	117060000	117070000	0	0	0	5	0	0	0	0	2	0	0	0	0	2.60559e-05	0	0	0	0	3.65303e-05	0	0	0	0	0	0	0	1.31478e-06	0	0	6.77874e-06	8.09352e-06	0	0	0	0	0	0	0	0	0	0	0	0	0	0
1901	1	11708	117070000	117080000	0	0	0	0	0	2	0	1	0	0	0	0	0	0	0	2.79357e-05	0	2.0859e-05	0	0	0	0	0	0	0	3.59838e-06	0	1.03578e-06	0	0	4.63416e-06	0	0	0	0	0	0	0	0	0	0	0	0	0	0
1902	1	11709	117080000	117090000	1	0	0	0	0	0	1	0	0	0	0.000429923	0	0	0	0	0	1.16649e-05	0	0	0	6.1227e-05	0	0	0	0	0	0	0	6.11658e-07	0	6.18386e-05	0	0	0	0	0	0	0	0	0	0	0	0	0	0
1903	1	1171	11700000	11710000	0	0	0	3	0	1	0	0	0	0	0	0	0	1.56335e-05	0	1.39678e-05	0	0	0	0	0	0	0	0	0	0	0	5.17889e-07	0	4.06725e-06	4.58513e-06	0	0	0	0	0	0	0	0	0	0	0	0	0	0
1904	1	11710	117090000	117100000	0	0	0	2	0	0	0	1	1	0	0	0	0	1.04224e-05	0	0	0	2.0859e-05	1.82652e-05	0	0	0	0	0	0	3.59838e-06	6.57388e-07	0	0	2.7115e-06	6.96727e-06	0	0	0	0	0	0	0	0	0	0	0	0	0	0
1905	1	11711	117100000	117110000	0	0	0	1	0	0	0	0	0	0	0	0	0	5.21118e-06	0	0	0	0	0	0	0	0	0	0	0	0	0	0	0	1.35575e-06	1.35575e-06	0	0	0	0	0	0	0	0	0	0	0	0	0	0
1906	1	11712	117110000	117120000	0	0	0	2	0	0	0	0	0	0	0	0	0	1.04224e-05	0	0	0	0	0	0	0	0	0	0	0	0	0	0	0	2.7115e-06	2.7115e-06	0	0	0	0	0	0	0	0	0	0	0	0	0	0
1907	1	11713	117120000	117130000	0	0	0	0	0	0	1	0	1	0	0	0	0	0	0	0	1.16649e-05	0	1.82652e-05	0	0	0	0	0	0	0	6.57388e-07	0	6.11658e-07	0	1.26905e-06	0	0	0	0	0	0	0	0	0	0	0	0	0	0
1908	1	11714	117130000	117140000	0	0	0	0	0	0	1	1	1	0	0	0	0	0	0	0	1.16649e-05	2.0859e-05	1.82652e-05	0	0	0	0	0	0	3.59838e-06	6.57388e-07	0	6.11658e-07	0	4.86743e-06	0	0	0	0	0	0	0	0	0	0	0	0	0	0
1909	1	11715	117140000	117150000	0	0	0	0	0	0	0	0	0	0	0	0	0	0	0	0	0	0	0	0	0	0	0	0	0	0	0	0	0	0	0	0	0	0	0	0	0	0	0	0	0	0	0	0	0
1910	1	11716	117150000	117160000	0	0	0	1	0	0	1	0	0	0	0	0	0	5.21118e-06	0	0	1.16649e-05	0	0	0	0	0	0	0	0	0	0	0	6.11658e-07	1.35575e-06	1.96741e-06	0	0	0	0	0	0	0	0	0	0	0	0	0	0
1911	1	11717	117160000	117170000	0	0	0	0	0	0	0	0	0	0	0	0	0	0	0	0	0	0	0	0	0	0	0	0	0	0	0	0	0	0	0	0	0	0	0	0	0	0	0	0	0	0	0	0	0
1912	1	11718	117170000	117180000	0	0	0	0	0	0	0	0	0	0	0	0	0	0	0	0	0	0	0	0	0	0	0	0	0	0	0	0	0	0	0	0	0	0	0	0	0	0	0	0	0	0	0	0	0
1913	1	11719	117180000	117190000	0	0	0	0	0	0	0	0	0	0	0	0	0	0	0	0	0	0	0	0	0	0	0	0	0	0	0	0	0	0	0	0	0	0	0	0	0	0	0	0	0	0	0	0	0
1914	1	1172	11710000	11720000	0	0	0	3	0	0	0	0	0	0	0	0	0	1.56335e-05	0	0	0	0	0	0	0	0	0	0	0	0	0	0	0	4.06725e-06	4.06725e-06	0	0	0	0	0	0	0	0	0	0	0	0	0	0
1915	1	11720	117190000	117200000	0	0	0	0	0	0	0	0	0	0	0	0	0	0	0	0	0	0	0	0	0	0	0	0	0	0	0	0	0	0	0	0	0	0	0	0	0	0	0	0	0	0	0	0	0
1916	1	11721	117200000	117210000	0	0	0	0	0	0	0	0	0	0	0	0	0	0	0	0	0	0	0	0	0	0	0	0	0	0	0	0	0	0	0	0	0	0	0	0	0	0	0	0	0	0	0	0	0
1917	1	11722	117210000	117220000	0	0	0	4	0	0	0	0	0	0	0	0	0	2.08447e-05	0	0	0	0	0	0	0	0	0	0	0	0	0	0	0	5.42299e-06	5.42299e-06	0	0	0	0	0	0	0	0	0	0	0	0	0	0
1918	1	11723	117220000	117230000	0	0	0	0	0	0	0	0	0	0	0	0	0	0	0	0	0	0	0	0	0	0	0	0	0	0	0	0	0	0	0	0	0	0	0	0	0	0	0	0	0	0	0	0	0
1919	1	11724	117230000	117240000	0	0	0	1	0	0	0	0	0	0	0	0	0	5.21118e-06	0	0	0	0	0	0	0	0	0	0	0	0	0	0	0	1.35575e-06	1.35575e-06	0	0	0	0	0	0	0	0	0	0	0	0	0	0
1920	1	11725	117240000	117250000	0	0	0	0	0	0	0	0	0	0	0	0	0	0	0	0	0	0	0	0	0	0	0	0	0	0	0	0	0	0	0	0	0	0	0	0	0	0	0	0	0	0	0	0	0
1921	1	11726	117250000	117260000	0	2	0	2	0	0	0	0	1	0	0	0.000785546	0	1.04224e-05	0	0	0	0	1.82652e-05	0	0	0	5.36209e-06	0	0	0	6.57388e-07	0	0	2.7115e-06	8.73097e-06	0	0	0	0	0	0	0	0	0	0	0	0	0	0
1922	1	11727	117260000	117270000	0	0	0	0	0	0	0	1	0	0	0	0	0	0	0	0	0	2.0859e-05	0	0	0	0	0	0	0	3.59838e-06	0	0	0	0	3.59838e-06	0	0	0	0	0	0	0	0	0	0	0	0	0	0
1923	1	11728	117270000	117280000	0	0	0	2	0	0	0	1	0	0	0	0	0	1.04224e-05	0	0	0	2.0859e-05	0	0	0	0	0	0	0	3.59838e-06	0	0	0	2.7115e-06	6.30988e-06	0	0	0	0	0	0	0	0	0	0	0	0	0	0
1924	1	11729	117280000	117290000	0	0	0	0	0	0	0	0	0	0	0	0	0	0	0	0	0	0	0	0	0	0	0	0	0	0	0	0	0	0	0	0	0	0	0	0	0	0	0	0	0	0	0	0	0
1925	1	1173	11720000	11730000	0	0	0	1	0	0	0	1	0	0	0	0	0	5.21118e-06	0	0	0	2.0859e-05	0	0	0	0	0	0	0	3.59838e-06	0	0	0	1.35575e-06	4.95413e-06	0	0	0	0	0	0	0	0	0	0	0	0	0	0
1926	1	11730	117290000	117300000	0	0	0	0	0	0	2	0	0	0	0	0	0	0	0	0	2.33299e-05	0	0	0	0	0	0	0	0	0	0	0	1.22332e-06	0	1.22332e-06	0	0	0	0	0	0	0	0	0	0	0	0	0	0
1927	1	11731	117300000	117310000	0	0	0	0	0	1	0	0	0	0	0	0	0	0	0	1.39678e-05	0	0	0	0	0	0	0	0	0	0	0	5.17889e-07	0	0	5.17889e-07	0	0	0	0	0	0	0	0	0	0	0	0	0	0
1928	1	11732	117310000	117320000	0	0	0	0	0	0	0	0	2	0	0	0	0	0	0	0	0	0	3.65303e-05	0	0	0	0	0	0	0	1.31478e-06	0	0	0	1.31478e-06	0	0	0	0	0	0	0	0	0	0	0	0	0	0
1929	1	11733	117320000	117330000	0	0	0	4	0	0	0	0	0	0	0	0	0	2.08447e-05	0	0	0	0	0	0	0	0	0	0	0	0	0	0	0	5.42299e-06	5.42299e-06	0	0	0	0	0	0	0	0	0	0	0	0	0	0
1930	1	11734	117330000	117340000	0	0	0	0	0	0	0	0	2	0	0	0	0	0	0	0	0	0	3.65303e-05	0	0	0	0	0	0	0	1.31478e-06	0	0	0	1.31478e-06	0	0	0	0	0	0	0	0	0	0	0	0	0	0
1931	1	11735	117340000	117350000	0	0	0	0	0	0	0	0	2	0	0	0	0	0	0	0	0	0	3.65303e-05	0	0	0	0	0	0	0	1.31478e-06	0	0	0	1.31478e-06	0	0	0	0	0	0	0	0	0	0	0	0	0	0
1932	1	11736	117350000	117360000	0	0	0	3	0	0	0	0	1	0	0	0	0	1.56335e-05	0	0	0	0	1.82652e-05	0	0	0	0	0	0	0	6.57388e-07	0	0	4.06725e-06	4.72463e-06	0	0	0	0	0	0	0	0	0	0	0	0	0	0
1933	1	11737	117360000	117370000	0	0	0	1	0	0	0	0	0	0	0	0	0	5.21118e-06	0	0	0	0	0	0	0	0	0	0	0	0	0	0	0	1.35575e-06	1.35575e-06	0	0	0	0	0	0	0	0	0	0	0	0	0	0
1934	1	11738	117370000	117380000	0	0	0	0	0	0	0	0	0	0	0	0	0	0	0	0	0	0	0	0	0	0	0	0	0	0	0	0	0	0	0	0	0	0	0	0	0	0	0	0	0	0	0	0	0
1935	1	11739	117380000	117390000	0	0	0	0	0	1	2	0	1	0	0	0	0	0	0	1.39678e-05	2.33299e-05	0	1.82652e-05	0	0	0	0	0	0	0	6.57388e-07	5.17889e-07	1.22332e-06	0	2.39859e-06	0	0	0	0	0	0	0	0	0	0	0	0	0	0
1936	1	1174	11730000	11740000	0	0	0	1	0	0	0	0	0	0	0	0	0	5.21118e-06	0	0	0	0	0	0	0	0	0	0	0	0	0	0	0	1.35575e-06	1.35575e-06	0	0	0	0	0	0	0	0	0	0	0	0	0	0
1937	1	11740	117390000	117400000	0	0	0	0	0	1	0	0	0	0	0	0	0	0	0	1.39678e-05	0	0	0	0	0	0	0	0	0	0	0	5.17889e-07	0	0	5.17889e-07	0	0	0	0	0	0	0	0	0	0	0	0	0	0
1938	1	11741	117400000	117410000	0	0	0	1	0	1	0	0	0	0	0	0	0	5.21118e-06	0	1.39678e-05	0	0	0	0	0	0	0	0	0	0	0	5.17889e-07	0	1.35575e-06	1.87364e-06	0	0	0	0	0	0	0	0	0	0	0	0	0	0
1939	1	11742	117410000	117420000	0	0	0	1	0	0	0	1	0	0	0	0	0	5.21118e-06	0	0	0	2.0859e-05	0	0	0	0	0	0	0	3.59838e-06	0	0	0	1.35575e-06	4.95413e-06	0	0	0	0	0	0	0	0	0	0	0	0	0	0
1940	1	11743	117420000	117430000	0	0	0	0	0	0	0	0	0	0	0	0	0	0	0	0	0	0	0	0	0	0	0	0	0	0	0	0	0	0	0	0	0	0	0	0	0	0	0	0	0	0	0	0	0
1941	1	11744	117430000	117440000	0	0	0	0	0	1	0	0	0	0	0	0	0	0	0	1.39678e-05	0	0	0	0	0	0	0	0	0	0	0	5.17889e-07	0	0	5.17889e-07	0	0	0	0	0	0	0	0	0	0	0	0	0	0
1942	1	11745	117440000	117450000	0	0	0	0	0	4	0	0	1	0	0	0	0	0	0	5.58714e-05	0	0	1.82652e-05	0	0	0	0	0	0	0	6.57388e-07	2.07156e-06	0	0	2.72895e-06	0	0	0	0	0	0	0	0	0	0	0	0	0	0
1943	1	11746	117450000	117460000	0	0	0	0	0	0	0	0	0	0	0	0	0	0	0	0	0	0	0	0	0	0	0	0	0	0	0	0	0	0	0	0	0	0	0	0	0	0	0	0	0	0	0	0	0
1944	1	11747	117460000	117470000	0	0	0	0	0	0	0	0	1	0	0	0	0	0	0	0	0	0	1.82652e-05	0	0	0	0	0	0	0	6.57388e-07	0	0	0	6.57388e-07	0	0	0	0	0	0	0	0	0	0	0	0	0	0
1945	1	11748	117470000	117480000	0	0	0	0	1	0	0	1	1	0	0	0	0	0	4.48209e-05	0	0	2.0859e-05	1.82652e-05	0	0	0	0	0	5.43748e-06	3.59838e-06	6.57388e-07	0	0	0	9.69325e-06	0	0	0	0	0	0	0	0	0	0	0	0	0	0
1946	1	11749	117480000	117490000	0	0	0	0	0	2	0	0	0	0	0	0	0	0	0	2.79357e-05	0	0	0	0	0	0	0	0	0	0	0	1.03578e-06	0	0	1.03578e-06	0	0	0	0	0	0	0	0	0	0	0	0	0	0
1947	1	1175	11740000	11750000	0	0	0	0	0	2	0	0	0	0	0	0	0	0	0	2.79357e-05	0	0	0	0	0	0	0	0	0	0	0	1.03578e-06	0	0	1.03578e-06	0	0	0	0	0	0	0	0	0	0	0	0	0	0
1948	1	11750	117490000	117500000	0	0	0	1	0	0	1	0	0	0	0	0	0	5.21118e-06	0	0	1.16649e-05	0	0	0	0	0	0	0	0	0	0	0	6.11658e-07	1.35575e-06	1.96741e-06	0	0	0	0	0	0	0	0	0	0	0	0	0	0
1949	1	11751	117500000	117510000	0	0	0	0	0	0	0	0	0	0	0	0	0	0	0	0	0	0	0	0	0	0	0	0	0	0	0	0	0	0	0	0	0	0	0	0	0	0	0	0	0	0	0	0	0
1950	1	11752	117510000	117520000	0	0	0	1	0	0	0	0	0	0	0	0	0	5.21118e-06	0	0	0	0	0	0	0	0	0	0	0	0	0	0	0	1.35575e-06	1.35575e-06	0	0	0	0	0	0	0	0	0	0	0	0	0	0
1951	1	11753	117520000	117530000	0	0	0	1	0	1	0	0	0	0	0	0	0	5.21118e-06	0	1.39678e-05	0	0	0	0	0	0	0	0	0	0	0	5.17889e-07	0	1.35575e-06	1.87364e-06	0	0	0	0	0	0	0	0	0	0	0	0	0	0
1952	1	11754	117530000	117540000	0	0	0	1	0	2	0	0	0	0	0	0	0	5.21118e-06	0	2.79357e-05	0	0	0	0	0	0	0	0	0	0	0	1.03578e-06	0	1.35575e-06	2.39153e-06	0	0	0	0	0	0	0	0	0	0	0	0	0	0
1953	1	11755	117540000	117550000	0	0	0	2	0	0	0	0	1	0	0	0	0	1.04224e-05	0	0	0	0	1.82652e-05	0	0	0	0	0	0	0	6.57388e-07	0	0	2.7115e-06	3.36888e-06	0	0	0	0	0	0	0	0	0	0	0	0	0	0
1954	1	11756	117550000	117560000	0	0	0	0	0	0	0	0	0	0	0	0	0	0	0	0	0	0	0	0	0	0	0	0	0	0	0	0	0	0	0	0	0	0	0	0	0	0	0	0	0	0	0	0	0
1955	1	11757	117560000	117570000	0	0	0	0	0	0	0	0	0	0	0	0	0	0	0	0	0	0	0	0	0	0	0	0	0	0	0	0	0	0	0	0	0	0	0	0	0	0	0	0	0	0	0	0	0
1956	1	11758	117570000	117580000	0	0	0	2	0	0	0	1	0	0	0	0	0	1.04224e-05	0	0	0	2.0859e-05	0	0	0	0	0	0	0	3.59838e-06	0	0	0	2.7115e-06	6.30988e-06	0	0	0	0	0	0	0	0	0	0	0	0	0	0
1957	1	11759	117580000	117590000	0	0	0	1	0	1	3	3	0	0	0	0	0	5.21118e-06	0	1.39678e-05	3.49948e-05	6.25769e-05	0	0	0	0	0	0	0	1.07951e-05	0	5.17889e-07	1.83497e-06	1.35575e-06	1.45038e-05	0	0	0	0	0	0	0	0	0	0	0	0	0	0
1958	1	1176	11750000	11760000	0	0	0	0	0	2	0	0	0	0	0	0	0	0	0	2.79357e-05	0	0	0	0	0	0	0	0	0	0	0	1.03578e-06	0	0	1.03578e-06	0	0	0	0	0	0	0	0	0	0	0	0	0	0
1959	1	11760	117590000	117600000	0	0	0	1	0	0	0	0	2	0	0	0	0	5.21118e-06	0	0	0	0	3.65303e-05	0	0	0	0	0	0	0	1.31478e-06	0	0	1.35575e-06	2.67052e-06	0	0	0	0	0	0	0	0	0	0	0	0	0	0
1960	1	11761	117600000	117610000	0	0	0	0	0	0	0	0	0	0	0	0	0	0	0	0	0	0	0	0	0	0	0	0	0	0	0	0	0	0	0	0	0	0	0	0	0	0	0	0	0	0	0	0	0
1961	1	11762	117610000	117620000	0	0	0	2	0	0	0	0	0	0	0	0	0	1.04224e-05	0	0	0	0	0	0	0	0	0	0	0	0	0	0	0	2.7115e-06	2.7115e-06	0	0	0	0	0	0	0	0	0	0	0	0	0	0
1962	1	11763	117620000	117630000	0	0	0	3	1	1	0	0	0	0	0	0	0	1.56335e-05	4.48209e-05	1.39678e-05	0	0	0	0	0	0	0	0	5.43748e-06	0	0	5.17889e-07	0	4.06725e-06	1.00226e-05	0	0	0	0	0	0	0	0	0	0	0	0	0	0
1963	1	11764	117630000	117640000	0	0	0	0	0	1	0	0	1	0	0	0	0	0	0	1.39678e-05	0	0	1.82652e-05	0	0	0	0	0	0	0	6.57388e-07	5.17889e-07	0	0	1.17528e-06	0	0	0	0	0	0	0	0	0	0	0	0	0	0
1964	1	11765	117640000	117650000	0	0	0	2	0	0	0	0	2	0	0	0	0	1.04224e-05	0	0	0	0	3.65303e-05	0	0	0	0	0	0	0	1.31478e-06	0	0	2.7115e-06	4.02627e-06	0	0	0	0	0	0	0	0	0	0	0	0	0	0
1965	1	11766	117650000	117660000	0	0	0	6	0	0	0	0	0	0	0	0	0	3.12671e-05	0	0	0	0	0	0	0	0	0	0	0	0	0	0	0	8.13449e-06	8.13449e-06	0	0	0	0	0	0	0	0	0	0	0	0	0	0
1966	1	11767	117660000	117670000	0	0	0	0	0	0	0	0	0	0	0	0	0	0	0	0	0	0	0	0	0	0	0	0	0	0	0	0	0	0	0	0	0	0	0	0	0	0	0	0	0	0	0	0	0
1967	1	11768	117670000	117680000	0	0	0	3	0	2	0	0	0	0	0	0	0	1.56335e-05	0	2.79357e-05	0	0	0	0	0	0	0	0	0	0	0	1.03578e-06	0	4.06725e-06	5.10302e-06	0	0	0	0	0	0	0	0	0	0	0	0	0	0
1968	1	11769	117680000	117690000	0	0	0	0	0	2	0	0	0	0	0	0	0	0	0	2.79357e-05	0	0	0	0	0	0	0	0	0	0	0	1.03578e-06	0	0	1.03578e-06	0	0	0	0	0	0	0	0	0	0	0	0	0	0
1969	1	1177	11760000	11770000	0	0	0	0	0	0	0	0	0	0	0	0	0	0	0	0	0	0	0	0	0	0	0	0	0	0	0	0	0	0	0	0	0	0	0	0	0	0	0	0	0	0	0	0	0
1970	1	11770	117690000	117700000	0	0	0	2	1	0	2	0	0	0	0	0	0	1.04224e-05	4.48209e-05	0	2.33299e-05	0	0	0	0	0	0	0	5.43748e-06	0	0	0	1.22332e-06	2.7115e-06	9.37229e-06	0	0	0	0	0	0	0	0	0	0	0	0	0	0
1971	1	11771	117700000	117710000	0	0	0	2	0	0	0	0	0	0	0	0	0	1.04224e-05	0	0	0	0	0	0	0	0	0	0	0	0	0	0	0	2.7115e-06	2.7115e-06	0	0	0	0	0	0	0	0	0	0	0	0	0	0
1972	1	11772	117710000	117720000	0	0	0	2	0	0	0	0	0	0	0	0	0	1.04224e-05	0	0	0	0	0	0	0	0	0	0	0	0	0	0	0	2.7115e-06	2.7115e-06	0	0	0	0	0	0	0	0	0	0	0	0	0	0
1973	1	11773	117720000	117730000	0	0	0	0	0	1	0	0	0	0	0	0	0	0	0	1.39678e-05	0	0	0	0	0	0	0	0	0	0	0	5.17889e-07	0	0	5.17889e-07	0	0	0	0	0	0	0	0	0	0	0	0	0	0
1974	1	11774	117730000	117740000	0	0	0	0	0	1	0	0	0	0	0	0	0	0	0	1.39678e-05	0	0	0	0	0	0	0	0	0	0	0	5.17889e-07	0	0	5.17889e-07	0	0	0	0	0	0	0	0	0	0	0	0	0	0
1975	1	11775	117740000	117750000	0	0	0	1	0	0	0	1	0	0	0	0	0	5.21118e-06	0	0	0	2.0859e-05	0	0	0	0	0	0	0	3.59838e-06	0	0	0	1.35575e-06	4.95413e-06	0	0	0	0	0	0	0	0	0	0	0	0	0	0
1976	1	11776	117750000	117760000	0	0	0	0	0	1	0	0	0	0	0	0	0	0	0	1.39678e-05	0	0	0	0	0	0	0	0	0	0	0	5.17889e-07	0	0	5.17889e-07	0	0	0	0	0	0	0	0	0	0	0	0	0	0
1977	1	11777	117760000	117770000	0	0	0	0	0	0	0	0	0	0	0	0	0	0	0	0	0	0	0	0	0	0	0	0	0	0	0	0	0	0	0	0	0	0	0	0	0	0	0	0	0	0	0	0	0
1978	1	11778	117770000	117780000	0	0	0	0	0	1	0	0	0	0	0	0	0	0	0	1.39678e-05	0	0	0	0	0	0	0	0	0	0	0	5.17889e-07	0	0	5.17889e-07	0	0	0	0	0	0	0	0	0	0	0	0	0	0
1979	1	11779	117780000	117790000	0	0	0	1	0	1	0	0	0	0	0	0	0	5.21118e-06	0	1.39678e-05	0	0	0	0	0	0	0	0	0	0	0	5.17889e-07	0	1.35575e-06	1.87364e-06	0	0	0	0	0	0	0	0	0	0	0	0	0	0
1980	1	1178	11770000	11780000	0	0	0	1	0	6	0	0	0	0	0	0	0	5.21118e-06	0	8.38071e-05	0	0	0	0	0	0	0	0	0	0	0	3.10734e-06	0	1.35575e-06	4.46308e-06	0	0	0	0	0	0	0	0	0	0	0	0	0	0
1981	1	11780	117790000	117800000	0	0	0	0	0	0	0	0	0	0	0	0	0	0	0	0	0	0	0	0	0	0	0	0	0	0	0	0	0	0	0	0	0	0	0	0	0	0	0	0	0	0	0	0	0
1982	1	11781	117800000	117810000	0	0	0	0	0	0	0	0	0	0	0	0	0	0	0	0	0	0	0	0	0	0	0	0	0	0	0	0	0	0	0	0	0	0	0	0	0	0	0	0	0	0	0	0	0
1983	1	11782	117810000	117820000	0	0	0	0	0	0	0	0	0	0	0	0	0	0	0	0	0	0	0	0	0	0	0	0	0	0	0	0	0	0	0	0	0	0	0	0	0	0	0	0	0	0	0	0	0
1984	1	11783	117820000	117830000	0	0	0	0	0	0	0	0	1	0	0	0	0	0	0	0	0	0	1.82652e-05	0	0	0	0	0	0	0	6.57388e-07	0	0	0	6.57388e-07	0	0	0	0	0	0	0	0	0	0	0	0	0	0
1985	1	11784	117830000	117840000	0	0	0	0	0	1	0	0	0	0	0	0	0	0	0	1.39678e-05	0	0	0	0	0	0	0	0	0	0	0	5.17889e-07	0	0	5.17889e-07	0	0	0	0	0	0	0	0	0	0	0	0	0	0
1986	1	11785	117840000	117850000	0	0	0	0	0	0	0	0	0	0	0	0	0	0	0	0	0	0	0	0	0	0	0	0	0	0	0	0	0	0	0	0	0	0	0	0	0	0	0	0	0	0	0	0	0
1987	1	11786	117850000	117860000	0	0	0	1	0	0	0	0	0	0	0	0	0	5.21118e-06	0	0	0	0	0	0	0	0	0	0	0	0	0	0	0	1.35575e-06	1.35575e-06	0	0	0	0	0	0	0	0	0	0	0	0	0	0
1988	1	11787	117860000	117870000	0	0	0	0	0	2	0	0	0	0	0	0	0	0	0	2.79357e-05	0	0	0	0	0	0	0	0	0	0	0	1.03578e-06	0	0	1.03578e-06	0	0	0	0	0	0	0	0	0	0	0	0	0	0
1989	1	11788	117870000	117880000	0	0	0	4	0	0	0	0	1	0	0	0	0	2.08447e-05	0	0	0	0	1.82652e-05	0	0	0	0	0	0	0	6.57388e-07	0	0	5.42299e-06	6.08038e-06	0	0	0	0	0	0	0	0	0	0	0	0	0	0
1990	1	11789	117880000	117890000	0	0	0	0	0	0	2	0	0	0	0	0	0	0	0	0	2.33299e-05	0	0	0	0	0	0	0	0	0	0	0	1.22332e-06	0	1.22332e-06	0	0	0	0	0	0	0	0	0	0	0	0	0	0
1991	1	1179	11780000	11790000	0	0	0	0	0	0	0	0	0	0	0	0	0	0	0	0	0	0	0	0	0	0	0	0	0	0	0	0	0	0	0	0	0	0	0	0	0	0	0	0	0	0	0	0	0
1992	1	11790	117890000	117900000	0	0	0	2	0	0	0	0	0	0	0	0	0	1.04224e-05	0	0	0	0	0	0	0	0	0	0	0	0	0	0	0	2.7115e-06	2.7115e-06	0	0	0	0	0	0	0	0	0	0	0	0	0	0
1993	1	11791	117900000	117910000	0	0	0	2	1	0	0	0	0	0	0	0	0	1.04224e-05	4.48209e-05	0	0	0	0	0	0	0	0	0	5.43748e-06	0	0	0	0	2.7115e-06	8.14897e-06	0	0	0	0	0	0	0	0	0	0	0	0	0	0
1994	1	11792	117910000	117920000	0	0	0	0	0	0	0	0	0	0	0	0	0	0	0	0	0	0	0	0	0	0	0	0	0	0	0	0	0	0	0	0	0	0	0	0	0	0	0	0	0	0	0	0	0
1995	1	11793	117920000	117930000	0	0	0	1	0	0	0	0	0	0	0	0	0	5.21118e-06	0	0	0	0	0	0	0	0	0	0	0	0	0	0	0	1.35575e-06	1.35575e-06	0	0	0	0	0	0	0	0	0	0	0	0	0	0
1996	1	11794	117930000	117940000	0	0	0	3	0	2	0	0	0	0	0	0	0	1.56335e-05	0	2.79357e-05	0	0	0	0	0	0	0	0	0	0	0	1.03578e-06	0	4.06725e-06	5.10302e-06	0	0	0	0	0	0	0	0	0	0	0	0	0	0
1997	1	11795	117940000	117950000	0	0	0	0	0	0	1	0	0	0	0	0	0	0	0	0	1.16649e-05	0	0	0	0	0	0	0	0	0	0	0	6.11658e-07	0	6.11658e-07	0	0	0	0	0	0	0	0	0	0	0	0	0	0
1998	1	11796	117950000	117960000	0	0	0	0	0	2	0	0	0	0	0	0	0	0	0	2.79357e-05	0	0	0	0	0	0	0	0	0	0	0	1.03578e-06	0	0	1.03578e-06	0	0	0	0	0	0	0	0	0	0	0	0	0	0
1999	1	11797	117960000	117970000	0	0	0	0	2	0	0	0	0	0	0	0	0	0	8.96419e-05	0	0	0	0	0	0	0	0	0	1.0875e-05	0	0	0	0	0	1.0875e-05	0	0	0	0	0	0	0	0	0	0	0	0	0	0
[truncated: 63,536 more rows]
[truncated: 41 more columns]

## Sheet: structural_mutation_final_20_kb
	chr	new_wind	bkpt_in_window_blood	bkpt_in_window_bone	bkpt_in_window_brain	bkpt_in_window_breast	bkpt_in_window_liver	bkpt_in_window_ovary	bkpt_in_window_pancreatic	bkpt_in_window_prostate	bkpt_in_window_skin	bkpt_in_window_uterus	from	to	density_blood	density_bone	density_brain	density_breast	density_liver	density_ovary	density_pancreatic	density_prostate	density_skin	density_uterus	prod_density_blood	prod_density_brain	prod_density_bone	prod_density_uterus	prod_density_liver	prod_density_prostate	prod_density_skin	prod_density_ovary	prod_density_pancreatic	prod_density_breast	overall_density	blood_bkpt_hotspot_0.1	bone_bkpt_hotspot_0.1	brain_bkpt_hotspot_0.1	breast_bkpt_hotspot_0.1	liver_bkpt_hotspot_0.1	ovary_bkpt_hotspot_0.1	pancreatic_bkpt_hotspot_0.1	prostate_bkpt_hotspot_0.1	skin_bkpt_hotspot_0.1	uterus_bkpt_hotspot_0.1	overall_density_bkpt_hotspot_0.1	blood_bkpt_hotspot_0.05	bone_bkpt_hotspot_0.05	brain_bkpt_hotspot_0.05
1	1	1	0	0	0	0	0	0	1	0	0	0	0	20000	0	0	0	0	0	0	1.16649e-05	0	0	0	0	0	0	0	0	0	0	0	6.11658e-07	0	6.11658e-07	0	0	0	0	0	0	0	0	0	0	0	0	0	0
2	1	2	0	0	0	0	0	0	0	0	0	0	20000	40000	0	0	0	0	0	0	0	0	0	0	0	0	0	0	0	0	0	0	0	0	0	0	0	0	0	0	0	0	0	0	0	0	0	0	0
3	1	3	0	0	0	0	0	0	0	0	0	0	40000	60000	0	0	0	0	0	0	0	0	0	0	0	0	0	0	0	0	0	0	0	0	0	0	0	0	0	0	0	0	0	0	0	0	0	0	0
4	1	4	0	0	0	0	0	0	0	0	0	0	60000	80000	0	0	0	0	0	0	0	0	0	0	0	0	0	0	0	0	0	0	0	0	0	0	0	0	0	0	0	0	0	0	0	0	0	0	0
5	1	5	0	0	0	0	0	0	0	0	0	0	80000	100000	0	0	0	0	0	0	0	0	0	0	0	0	0	0	0	0	0	0	0	0	0	0	0	0	0	0	0	0	0	0	0	0	0	0	0
6	1	6	0	0	0	1	0	0	0	0	0	0	100000	120000	0	0	0	5.21118e-06	0	0	0	0	0	0	0	0	0	0	0	0	0	0	0	1.35575e-06	1.35575e-06	0	0	0	0	0	0	0	0	0	0	0	0	0	0
7	1	7	0	0	0	0	0	0	0	0	0	0	120000	140000	0	0	0	0	0	0	0	0	0	0	0	0	0	0	0	0	0	0	0	0	0	0	0	0	0	0	0	0	0	0	0	0	0	0	0
8	1	8	0	0	0	0	0	0	0	0	0	0	140000	160000	0	0	0	0	0	0	0	0	0	0	0	0	0	0	0	0	0	0	0	0	0	0	0	0	0	0	0	0	0	0	0	0	0	0	0
9	1	9	0	0	0	0	0	0	0	0	0	0	160000	180000	0	0	0	0	0	0	0	0	0	0	0	0	0	0	0	0	0	0	0	0	0	0	0	0	0	0	0	0	0	0	0	0	0	0	0
10	1	10	0	0	0	0	0	0	0	0	0	0	180000	200000	0	0	0	0	0	0	0	0	0	0	0	0	0	0	0	0	0	0	0	0	0	0	0	0	0	0	0	0	0	0	0	0	0	0	0
11	1	11	0	0	0	0	0	0	0	0	0	0	200000	220000	0	0	0	0	0	0	0	0	0	0	0	0	0	0	0	0	0	0	0	0	0	0	0	0	0	0	0	0	0	0	0	0	0	0	0
12	1	12	0	0	0	1	0	0	0	0	0	0	220000	240000	0	0	0	5.21118e-06	0	0	0	0	0	0	0	0	0	0	0	0	0	0	0	1.35575e-06	1.35575e-06	0	0	0	0	0	0	0	0	0	0	0	0	0	0
13	1	13	0	0	0	2	0	1	0	0	0	0	240000	260000	0	0	0	1.04224e-05	0	1.39678e-05	0	0	0	0	0	0	0	0	0	0	0	5.17889e-07	0	2.7115e-06	3.22939e-06	0	0	0	0	0	0	0	0	0	0	0	0	0	0
14	1	14	0	0	0	0	0	0	0	0	0	0	260000	280000	0	0	0	0	0	0	0	0	0	0	0	0	0	0	0	0	0	0	0	0	0	0	0	0	0	0	0	0	0	0	0	0	0	0	0
15	1	15	0	0	0	0	0	0	0	0	0	0	280000	300000	0	0	0	0	0	0	0	0	0	0	0	0	0	0	0	0	0	0	0	0	0	0	0	0	0	0	0	0	0	0	0	0	0	0	0
16	1	16	0	0	0	0	0	0	0	0	0	0	300000	320000	0	0	0	0	0	0	0	0	0	0	0	0	0	0	0	0	0	0	0	0	0	0	0	0	0	0	0	0	0	0	0	0	0	0	0
17	1	17	0	0	0	0	0	0	0	0	0	0	320000	340000	0	0	0	0	0	0	0	0	0	0	0	0	0	0	0	0	0	0	0	0	0	0	0	0	0	0	0	0	0	0	0	0	0	0	0
18	1	18	0	0	0	0	0	0	0	0	0	0	340000	360000	0	0	0	0	0	0	0	0	0	0	0	0	0	0	0	0	0	0	0	0	0	0	0	0	0	0	0	0	0	0	0	0	0	0	0
19	1	19	0	0	0	0	0	0	0	0	0	0	360000	380000	0	0	0	0	0	0	0	0	0	0	0	0	0	0	0	0	0	0	0	0	0	0	0	0	0	0	0	0	0	0	0	0	0	0	0
20	1	20	0	0	0	0	0	1	1	0	0	0	380000	400000	0	0	0	0	0	1.39678e-05	1.16649e-05	0	0	0	0	0	0	0	0	0	0	5.17889e-07	6.11658e-07	0	1.12955e-06	0	0	0	0	0	0	0	0	0	0	0	0	0	0
21	1	21	0	0	0	0	0	0	0	0	0	0	400000	420000	0	0	0	0	0	0	0	0	0	0	0	0	0	0	0	0	0	0	0	0	0	0	0	0	0	0	0	0	0	0	0	0	0	0	0
22	1	22	0	0	0	0	0	0	0	0	0	0	420000	440000	0	0	0	0	0	0	0	0	0	0	0	0	0	0	0	0	0	0	0	0	0	0	0	0	0	0	0	0	0	0	0	0	0	0	0
23	1	23	0	0	0	0	0	0	0	0	0	0	440000	460000	0	0	0	0	0	0	0	0	0	0	0	0	0	0	0	0	0	0	0	0	0	0	0	0	0	0	0	0	0	0	0	0	0	0	0
24	1	24	0	0	0	0	0	0	0	0	1	0	460000	480000	0	0	0	0	0	0	0	0	1.82652e-05	0	0	0	0	0	0	0	6.57388e-07	0	0	0	6.57388e-07	0	0	0	0	0	0	0	0	0	0	0	0	0	0
25	1	25	0	0	0	0	0	0	0	0	0	0	480000	500000	0	0	0	0	0	0	0	0	0	0	0	0	0	0	0	0	0	0	0	0	0	0	0	0	0	0	0	0	0	0	0	0	0	0	0
26	1	26	0	0	0	0	0	0	0	0	0	0	500000	520000	0	0	0	0	0	0	0	0	0	0	0	0	0	0	0	0	0	0	0	0	0	0	0	0	0	0	0	0	0	0	0	0	0	0	0
27	1	27	0	0	0	0	0	0	0	0	0	0	520000	540000	0	0	0	0	0	0	0	0	0	0	0	0	0	0	0	0	0	0	0	0	0	0	0	0	0	0	0	0	0	0	0	0	0	0	0
28	1	28	0	0	0	0	0	2	0	0	0	0	540000	560000	0	0	0	0	0	2.79357e-05	0	0	0	0	0	0	0	0	0	0	0	1.03578e-06	0	0	1.03578e-06	0	0	0	0	0	0	0	0	0	0	0	0	0	0
29	1	29	0	0	0	2	0	0	1	0	1	0	560000	580000	0	0	0	1.04224e-05	0	0	1.16649e-05	0	1.82652e-05	0	0	0	0	0	0	0	6.57388e-07	0	6.11658e-07	2.7115e-06	3.98054e-06	0	0	0	0	0	0	0	0	0	0	0	0	0	0
30	1	30	0	0	0	0	0	0	0	0	0	0	580000	600000	0	0	0	0	0	0	0	0	0	0	0	0	0	0	0	0	0	0	0	0	0	0	0	0	0	0	0	0	0	0	0	0	0	0	0
31	1	31	0	0	0	0	0	0	1	0	0	0	600000	620000	0	0	0	0	0	0	1.16649e-05	0	0	0	0	0	0	0	0	0	0	0	6.11658e-07	0	6.11658e-07	0	0	0	0	0	0	0	0	0	0	0	0	0	0
32	1	32	0	0	0	0	0	0	0	0	0	0	620000	640000	0	0	0	0	0	0	0	0	0	0	0	0	0	0	0	0	0	0	0	0	0	0	0	0	0	0	0	0	0	0	0	0	0	0	0
33	1	33	0	0	0	0	0	0	0	0	0	0	640000	660000	0	0	0	0	0	0	0	0	0	0	0	0	0	0	0	0	0	0	0	0	0	0	0	0	0	0	0	0	0	0	0	0	0	0	0
34	1	34	0	0	0	0	0	0	0	0	0	0	660000	680000	0	0	0	0	0	0	0	0	0	0	0	0	0	0	0	0	0	0	0	0	0	0	0	0	0	0	0	0	0	0	0	0	0	0	0
35	1	35	0	0	0	1	0	0	0	0	0	0	680000	700000	0	0	0	5.21118e-06	0	0	0	0	0	0	0	0	0	0	0	0	0	0	0	1.35575e-06	1.35575e-06	0	0	0	0	0	0	0	0	0	0	0	0	0	0
36	1	36	0	0	0	0	0	0	1	0	0	0	700000	720000	0	0	0	0	0	0	1.16649e-05	0	0	0	0	0	0	0	0	0	0	0	6.11658e-07	0	6.11658e-07	0	0	0	0	0	0	0	0	0	0	0	0	0	0
37	1	37	0	0	0	2	0	0	0	0	0	0	720000	740000	0	0	0	1.04224e-05	0	0	0	0	0	0	0	0	0	0	0	0	0	0	0	2.7115e-06	2.7115e-06	0	0	0	0	0	0	0	0	0	0	0	0	0	0
38	1	38	0	0	2	7	0	0	0	0	0	0	740000	760000	0	0	0.00128123	3.64783e-05	0	0	0	0	0	0	0	5.08835e-05	0	0	0	0	0	0	0	9.49024e-06	6.03737e-05	0	0	0	0	0	0	0	0	0	0	0	0	0	0
39	1	39	0	0	0	3	0	0	1	0	0	0	760000	780000	0	0	0	1.56335e-05	0	0	1.16649e-05	0	0	0	0	0	0	0	0	0	0	0	6.11658e-07	4.06725e-06	4.6789e-06	0	0	0	0	0	0	0	0	0	0	0	0	0	0
40	1	40	0	0	0	0	0	1	0	0	1	0	780000	800000	0	0	0	0	0	1.39678e-05	0	0	1.82652e-05	0	0	0	0	0	0	0	6.57388e-07	5.17889e-07	0	0	1.17528e-06	0	0	0	0	0	0	0	0	0	0	0	0	0	0
41	1	41	0	0	0	1	0	0	0	1	0	0	800000	820000	0	0	0	5.21118e-06	0	0	0	2.0859e-05	0	0	0	0	0	0	0	3.59838e-06	0	0	0	1.35575e-06	4.95413e-06	0	0	0	0	0	0	0	0	0	0	0	0	0	0
42	1	42	0	0	0	2	0	1	0	0	0	0	820000	840000	0	0	0	1.04224e-05	0	1.39678e-05	0	0	0	0	0	0	0	0	0	0	0	5.17889e-07	0	2.7115e-06	3.22939e-06	0	0	0	0	0	0	0	0	0	0	0	0	0	0
43	1	43	0	0	0	0	0	0	1	0	0	0	840000	860000	0	0	0	0	0	0	1.16649e-05	0	0	0	0	0	0	0	0	0	0	0	6.11658e-07	0	6.11658e-07	0	0	0	0	0	0	0	0	0	0	0	0	0	0
44	1	44	0	0	0	1	0	0	3	0	0	0	860000	880000	0	0	0	5.21118e-06	0	0	3.49948e-05	0	0	0	0	0	0	0	0	0	0	0	1.83497e-06	1.35575e-06	3.19072e-06	0	0	0	0	0	0	0	0	0	0	0	0	0	0
45	1	45	0	0	0	0	0	4	0	0	0	0	880000	900000	0	0	0	0	0	5.58714e-05	0	0	0	0	0	0	0	0	0	0	0	2.07156e-06	0	0	2.07156e-06	0	0	0	0	0	0	0	0	0	0	0	0	0	0
46	1	46	0	0	0	3	0	0	2	1	1	0	900000	920000	0	0	0	1.56335e-05	0	0	2.33299e-05	2.0859e-05	1.82652e-05	0	0	0	0	0	0	3.59838e-06	6.57388e-07	0	1.22332e-06	4.06725e-06	9.54633e-06	0	0	0	0	0	0	0	0	0	0	0	0	0	0
47	1	47	0	0	0	1	0	1	2	7	0	0	920000	940000	0	0	0	5.21118e-06	0	1.39678e-05	2.33299e-05	0.000146013	0	0	0	0	0	0	0	2.51887e-05	0	5.17889e-07	1.22332e-06	1.35575e-06	2.82856e-05	0	0	0	0	0	0	0	0	0	0	0	0	0	0
48	1	48	0	0	0	0	0	0	2	1	0	0	940000	960000	0	0	0	0	0	0	2.33299e-05	2.0859e-05	0	0	0	0	0	0	0	3.59838e-06	0	0	1.22332e-06	0	4.8217e-06	0	0	0	0	0	0	0	0	0	0	0	0	0	0
49	1	49	0	0	0	1	0	0	0	0	2	0	960000	980000	0	0	0	5.21118e-06	0	0	0	0	3.65303e-05	0	0	0	0	0	0	0	1.31478e-06	0	0	1.35575e-06	2.67052e-06	0	0	0	0	0	0	0	0	0	0	0	0	0	0
50	1	50	0	0	0	3	0	0	2	0	1	0	980000	1000000	0	0	0	1.56335e-05	0	0	2.33299e-05	0	1.82652e-05	0	0	0	0	0	0	0	6.57388e-07	0	1.22332e-06	4.06725e-06	5.94795e-06	0	0	0	0	0	0	0	0	0	0	0	0	0	0
51	1	51	0	0	0	0	0	1	1	0	1	0	1000000	1020000	0	0	0	0	0	1.39678e-05	1.16649e-05	0	1.82652e-05	0	0	0	0	0	0	0	6.57388e-07	5.17889e-07	6.11658e-07	0	1.78694e-06	0	0	0	0	0	0	0	0	0	0	0	0	0	0
52	1	52	0	0	0	9	0	8	0	8	0	0	1020000	1040000	0	0	0	4.69006e-05	0	0.000111743	0	0.000166872	0	0	0	0	0	0	0	2.87871e-05	0	4.14312e-06	0	1.22017e-05	4.51319e-05	0	0	0	0	0	0	0	0	0	0	0	0	0	0
53	1	53	0	2	0	2	0	0	1	0	9	0	1040000	1060000	0	0.000785546	0	1.04224e-05	0	0	1.16649e-05	0	0.000164387	0	0	0	5.36209e-06	0	0	0	5.91649e-06	0	6.11658e-07	2.7115e-06	1.46017e-05	0	0	0	0	0	0	0	0	0	0	0	0	0	0
54	1	54	0	0	0	1	0	0	0	0	4	0	1060000	1080000	0	0	0	5.21118e-06	0	0	0	0	7.30607e-05	0	0	0	0	0	0	0	2.62955e-06	0	0	1.35575e-06	3.9853e-06	0	0	0	0	0	0	0	0	0	0	0	0	0	0
55	1	55	0	0	0	0	0	0	0	0	7	0	1080000	1100000	0	0	0	0	0	0	0	0	0.000127856	0	0	0	0	0	0	0	4.60171e-06	0	0	0	4.60171e-06	0	0	0	0	0	0	0	0	0	0	0	0	0	0
56	1	56	0	0	0	2	1	0	4	0	5	0	1100000	1120000	0	0	0	1.04224e-05	4.48209e-05	0	4.66597e-05	0	9.13259e-05	0	0	0	0	0	5.43748e-06	0	3.28694e-06	0	2.44663e-06	2.7115e-06	1.38825e-05	0	0	0	0	0	0	0	0	0	0	0	0	0	0
57	1	57	0	0	0	1	0	2	2	10	5	0	1120000	1140000	0	0	0	5.21118e-06	0	2.79357e-05	2.33299e-05	0.00020859	9.13259e-05	0	0	0	0	0	0	3.59838e-05	3.28694e-06	1.03578e-06	1.22332e-06	1.35575e-06	4.28856e-05	0	0	0	0	0	0	0	0	0	0	0	0	0	0
58	1	58	0	0	0	1	1	0	2	0	3	0	1140000	1160000	0	0	0	5.21118e-06	4.48209e-05	0	2.33299e-05	0	5.47955e-05	0	0	0	0	0	5.43748e-06	0	1.97216e-06	0	1.22332e-06	1.35575e-06	9.9887e-06	0	0	0	0	0	0	0	0	0	0	0	0	0	0
59	1	59	0	0	0	2	0	0	0	1	3	0	1160000	1180000	0	0	0	1.04224e-05	0	0	0	2.0859e-05	5.47955e-05	0	0	0	0	0	0	3.59838e-06	1.97216e-06	0	0	2.7115e-06	8.28204e-06	0	0	0	0	0	0	0	0	0	0	0	0	0	0
60	1	60	0	0	0	4	0	0	0	0	0	0	1180000	1200000	0	0	0	2.08447e-05	0	0	0	0	0	0	0	0	0	0	0	0	0	0	0	5.42299e-06	5.42299e-06	0	0	0	0	0	0	0	0	0	0	0	0	0	0
61	1	61	0	0	0	2	1	3	0	2	1	0	1200000	1220000	0	0	0	1.04224e-05	4.48209e-05	4.19035e-05	0	4.17179e-05	1.82652e-05	0	0	0	0	0	5.43748e-06	7.19677e-06	6.57388e-07	1.55367e-06	0	2.7115e-06	1.75568e-05	0	0	0	0	0	0	0	0	0	0	0	0	0	0
62	1	62	0	0	0	1	0	1	0	0	0	0	1220000	1240000	0	0	0	5.21118e-06	0	1.39678e-05	0	0	0	0	0	0	0	0	0	0	0	5.17889e-07	0	1.35575e-06	1.87364e-06	0	0	0	0	0	0	0	0	0	0	0	0	0	0
63	1	63	0	0	0	3	0	1	0	0	3	0	1240000	1260000	0	0	0	1.56335e-05	0	1.39678e-05	0	0	5.47955e-05	0	0	0	0	0	0	0	1.97216e-06	5.17889e-07	0	4.06725e-06	6.5573e-06	0	0	0	0	0	0	0	0	0	0	0	0	0	0
64	1	64	0	0	0	12	1	0	2	0	0	0	1260000	1280000	0	0	0	6.25342e-05	4.48209e-05	0	2.33299e-05	0	0	0	0	0	0	0	5.43748e-06	0	0	0	1.22332e-06	1.6269e-05	2.29298e-05	0	0	0	0	0	0	0	0	0	0	0	0	0	0
65	1	65	0	0	0	4	0	0	0	1	0	0	1280000	1300000	0	0	0	2.08447e-05	0	0	0	2.0859e-05	0	0	0	0	0	0	0	3.59838e-06	0	0	0	5.42299e-06	9.02138e-06	0	0	0	0	0	0	0	0	0	0	0	0	0	0
66	1	66	0	0	0	2	0	1	1	0	0	0	1300000	1320000	0	0	0	1.04224e-05	0	1.39678e-05	1.16649e-05	0	0	0	0	0	0	0	0	0	0	5.17889e-07	6.11658e-07	2.7115e-06	3.84104e-06	0	0	0	0	0	0	0	0	0	0	0	0	0	0
67	1	67	0	0	0	0	0	0	2	0	0	0	1320000	1340000	0	0	0	0	0	0	2.33299e-05	0	0	0	0	0	0	0	0	0	0	0	1.22332e-06	0	1.22332e-06	0	0	0	0	0	0	0	0	0	0	0	0	0	0
68	1	68	0	0	0	0	0	1	0	0	0	0	1340000	1360000	0	0	0	0	0	1.39678e-05	0	0	0	0	0	0	0	0	0	0	0	5.17889e-07	0	0	5.17889e-07	0	0	0	0	0	0	0	0	0	0	0	0	0	0
69	1	69	0	0	0	0	0	0	3	0	0	0	1360000	1380000	0	0	0	0	0	0	3.49948e-05	0	0	0	0	0	0	0	0	0	0	0	1.83497e-06	0	1.83497e-06	0	0	0	0	0	0	0	0	0	0	0	0	0	0
70	1	70	0	0	0	0	0	2	0	0	0	0	1380000	1400000	0	0	0	0	0	2.79357e-05	0	0	0	0	0	0	0	0	0	0	0	1.03578e-06	0	0	1.03578e-06	0	0	0	0	0	0	0	0	0	0	0	0	0	0
71	1	71	0	0	0	1	0	0	0	0	0	0	1400000	1420000	0	0	0	5.21118e-06	0	0	0	0	0	0	0	0	0	0	0	0	0	0	0	1.35575e-06	1.35575e-06	0	0	0	0	0	0	0	0	0	0	0	0	0	0
72	1	72	0	0	0	1	0	0	1	0	0	0	1420000	1440000	0	0	0	5.21118e-06	0	0	1.16649e-05	0	0	0	0	0	0	0	0	0	0	0	6.11658e-07	1.35575e-06	1.96741e-06	0	0	0	0	0	0	0	0	0	0	0	0	0	0
73	1	73	0	0	0	1	0	1	0	0	0	0	1440000	1460000	0	0	0	5.21118e-06	0	1.39678e-05	0	0	0	0	0	0	0	0	0	0	0	5.17889e-07	0	1.35575e-06	1.87364e-06	0	0	0	0	0	0	0	0	0	0	0	0	0	0
74	1	74	0	0	0	0	0	2	0	0	1	0	1460000	1480000	0	0	0	0	0	2.79357e-05	0	0	1.82652e-05	0	0	0	0	0	0	0	6.57388e-07	1.03578e-06	0	0	1.69317e-06	0	0	0	0	0	0	0	0	0	0	0	0	0	0
75	1	75	0	0	0	2	0	0	0	0	0	0	1480000	1500000	0	0	0	1.04224e-05	0	0	0	0	0	0	0	0	0	0	0	0	0	0	0	2.7115e-06	2.7115e-06	0	0	0	0	0	0	0	0	0	0	0	0	0	0
76	1	76	0	0	0	0	0	0	0	0	0	0	1500000	1520000	0	0	0	0	0	0	0	0	0	0	0	0	0	0	0	0	0	0	0	0	0	0	0	0	0	0	0	0	0	0	0	0	0	0	0
77	1	77	0	0	0	2	0	3	0	0	0	0	1520000	1540000	0	0	0	1.04224e-05	0	4.19035e-05	0	0	0	0	0	0	0	0	0	0	0	1.55367e-06	0	2.7115e-06	4.26517e-06	0	0	0	0	0	0	0	0	0	0	0	0	0	0
78	1	78	0	0	0	3	0	0	0	0	0	0	1540000	1560000	0	0	0	1.56335e-05	0	0	0	0	0	0	0	0	0	0	0	0	0	0	0	4.06725e-06	4.06725e-06	0	0	0	0	0	0	0	0	0	0	0	0	0	0
79	1	79	2	0	0	0	1	0	0	0	0	0	1560000	1580000	0.000859845	0	0	0	4.48209e-05	0	0	0	0	0	0.000122454	0	0	0	5.43748e-06	0	0	0	0	0	0.000127891	0	0	0	0	0	0	0	0	0	0	0	0	0	0
80	1	80	0	0	0	0	0	0	2	1	0	0	1580000	1600000	0	0	0	0	0	0	2.33299e-05	2.0859e-05	0	0	0	0	0	0	0	3.59838e-06	0	0	1.22332e-06	0	4.8217e-06	0	0	0	0	0	0	0	0	0	0	0	0	0	0
81	1	81	0	0	0	1	0	0	1	0	1	0	1600000	1620000	0	0	0	5.21118e-06	0	0	1.16649e-05	0	1.82652e-05	0	0	0	0	0	0	0	6.57388e-07	0	6.11658e-07	1.35575e-06	2.62479e-06	0	0	0	0	0	0	0	0	0	0	0	0	0	0
82	1	82	0	0	0	0	1	8	1	0	0	0	1620000	1640000	0	0	0	0	4.48209e-05	0.000111743	1.16649e-05	0	0	0	0	0	0	0	5.43748e-06	0	0	4.14312e-06	6.11658e-07	0	1.01923e-05	0	0	0	0	0	0	0	0	0	0	0	0	0	0
83	1	83	0	0	0	5	0	0	0	2	0	0	1640000	1660000	0	0	0	2.60559e-05	0	0	0	4.17179e-05	0	0	0	0	0	0	0	7.19677e-06	0	0	0	6.77874e-06	1.39755e-05	0	0	0	0	0	0	0	0	0	0	0	0	0	0
84	1	84	0	0	0	1	0	3	0	0	1	0	1660000	1680000	0	0	0	5.21118e-06	0	4.19035e-05	0	0	1.82652e-05	0	0	0	0	0	0	0	6.57388e-07	1.55367e-06	0	1.35575e-06	3.5668e-06	0	0	0	0	0	0	0	0	0	0	0	0	0	0
85	1	85	0	0	0	0	1	0	0	0	2	0	1680000	1700000	0	0	0	0	4.48209e-05	0	0	0	3.65303e-05	0	0	0	0	0	5.43748e-06	0	1.31478e-06	0	0	0	6.75225e-06	0	0	0	0	0	0	0	0	0	0	0	0	0	0
86	1	86	0	0	0	1	0	2	3	1	2	0	1700000	1720000	0	0	0	5.21118e-06	0	2.79357e-05	3.49948e-05	2.0859e-05	3.65303e-05	0	0	0	0	0	0	3.59838e-06	1.31478e-06	1.03578e-06	1.83497e-06	1.35575e-06	9.13966e-06	0	0	0	0	0	0	0	0	0	0	0	0	0	0
87	1	87	0	0	0	1	0	0	2	0	2	0	1720000	1740000	0	0	0	5.21118e-06	0	0	2.33299e-05	0	3.65303e-05	0	0	0	0	0	0	0	1.31478e-06	0	1.22332e-06	1.35575e-06	3.89384e-06	0	0	0	0	0	0	0	0	0	0	0	0	0	0
88	1	88	0	0	0	1	0	5	2	1	0	0	1740000	1760000	0	0	0	5.21118e-06	0	6.98392e-05	2.33299e-05	2.0859e-05	0	0	0	0	0	0	0	3.59838e-06	0	2.58945e-06	1.22332e-06	1.35575e-06	8.76689e-06	0	0	0	0	0	0	0	0	0	0	0	0	0	0
89	1	89	0	0	0	1	0	3	1	1	2	0	1760000	1780000	0	0	0	5.21118e-06	0	4.19035e-05	1.16649e-05	2.0859e-05	3.65303e-05	0	0	0	0	0	0	3.59838e-06	1.31478e-06	1.55367e-06	6.11658e-07	1.35575e-06	8.43423e-06	0	0	0	0	0	0	0	0	0	0	0	0	0	0
90	1	90	0	0	0	3	0	1	0	0	0	0	1780000	1800000	0	0	0	1.56335e-05	0	1.39678e-05	0	0	0	0	0	0	0	0	0	0	0	5.17889e-07	0	4.06725e-06	4.58513e-06	0	0	0	0	0	0	0	0	0	0	0	0	0	0
91	1	91	0	0	0	2	0	0	0	0	1	0	1800000	1820000	0	0	0	1.04224e-05	0	0	0	0	1.82652e-05	0	0	0	0	0	0	0	6.57388e-07	0	0	2.7115e-06	3.36888e-06	0	0	0	0	0	0	0	0	0	0	0	0	0	0
92	1	92	0	0	0	2	0	0	1	0	0	0	1820000	1840000	0	0	0	1.04224e-05	0	0	1.16649e-05	0	0	0	0	0	0	0	0	0	0	0	6.11658e-07	2.7115e-06	3.32315e-06	0	0	0	0	0	0	0	0	0	0	0	0	0	0
93	1	93	0	2	0	0	0	0	0	0	0	0	1840000	1860000	0	0.000785546	0	0	0	0	0	0	0	0	0	0	5.36209e-06	0	0	0	0	0	0	0	5.36209e-06	0	0	0	0	0	0	0	0	0	0	0	0	0	0
94	1	94	0	0	0	3	1	1	7	1	2	0	1860000	1880000	0	0	0	1.56335e-05	4.48209e-05	1.39678e-05	8.16546e-05	2.0859e-05	3.65303e-05	0	0	0	0	0	5.43748e-06	3.59838e-06	1.31478e-06	5.17889e-07	4.28161e-06	4.06725e-06	1.92174e-05	0	0	0	0	0	0	0	0	0	0	0	0	0	0
95	1	95	0	0	0	1	0	0	0	0	0	0	1880000	1900000	0	0	0	5.21118e-06	0	0	0	0	0	0	0	0	0	0	0	0	0	0	0	1.35575e-06	1.35575e-06	0	0	0	0	0	0	0	0	0	0	0	0	0	0
96	1	96	0	0	0	0	0	0	0	0	0	0	1900000	1920000	0	0	0	0	0	0	0	0	0	0	0	0	0	0	0	0	0	0	0	0	0	0	0	0	0	0	0	0	0	0	0	0	0	0	0
97	1	97	0	0	0	0	0	1	0	0	1	0	1920000	1940000	0	0	0	0	0	1.39678e-05	0	0	1.82652e-05	0	0	0	0	0	0	0	6.57388e-07	5.17889e-07	0	0	1.17528e-06	0	0	0	0	0	0	0	0	0	0	0	0	0	0
98	1	98	0	0	0	1	0	0	0	0	0	0	1940000	1960000	0	0	0	5.21118e-06	0	0	0	0	0	0	0	0	0	0	0	0	0	0	0	1.35575e-06	1.35575e-06	0	0	0	0	0	0	0	0	0	0	0	0	0	0
99	1	99	0	0	0	2	0	0	0	0	1	0	1960000	1980000	0	0	0	1.04224e-05	0	0	0	0	1.82652e-05	0	0	0	0	0	0	0	6.57388e-07	0	0	2.7115e-06	3.36888e-06	0	0	0	0	0	0	0	0	0	0	0	0	0	0
100	1	100	0	0	0	1	0	0	0	0	5	0	1980000	2000000	0	0	0	5.21118e-06	0	0	0	0	9.13259e-05	0	0	0	0	0	0	0	3.28694e-06	0	0	1.35575e-06	4.64269e-06	0	0	0	0	0	0	0	0	0	0	0	0	0	0
101	1	101	0	0	0	2	0	0	1	0	1	0	2000000	2020000	0	0	0	1.04224e-05	0	0	1.16649e-05	0	1.82652e-05	0	0	0	0	0	0	0	6.57388e-07	0	6.11658e-07	2.7115e-06	3.98054e-06	0	0	0	0	0	0	0	0	0	0	0	0	0	0
102	1	102	0	0	0	3	0	0	1	0	0	0	2020000	2040000	0	0	0	1.56335e-05	0	0	1.16649e-05	0	0	0	0	0	0	0	0	0	0	0	6.11658e-07	4.06725e-06	4.6789e-06	0	0	0	0	0	0	0	0	0	0	0	0	0	0
103	1	103	0	0	0	0	0	1	1	0	0	0	2040000	2060000	0	0	0	0	0	1.39678e-05	1.16649e-05	0	0	0	0	0	0	0	0	0	0	5.17889e-07	6.11658e-07	0	1.12955e-06	0	0	0	0	0	0	0	0	0	0	0	0	0	0
104	1	104	0	0	0	0	0	0	0	0	1	0	2060000	2080000	0	0	0	0	0	0	0	0	1.82652e-05	0	0	0	0	0	0	0	6.57388e-07	0	0	0	6.57388e-07	0	0	0	0	0	0	0	0	0	0	0	0	0	0
105	1	105	0	0	0	1	0	0	0	0	0	0	2080000	2100000	0	0	0	5.21118e-06	0	0	0	0	0	0	0	0	0	0	0	0	0	0	0	1.35575e-06	1.35575e-06	0	0	0	0	0	0	0	0	0	0	0	0	0	0
106	1	106	0	0	0	0	0	0	0	0	0	0	2100000	2120000	0	0	0	0	0	0	0	0	0	0	0	0	0	0	0	0	0	0	0	0	0	0	0	0	0	0	0	0	0	0	0	0	0	0	0
107	1	107	2	0	0	0	0	0	0	0	0	0	2120000	2140000	0.000859845	0	0	0	0	0	0	0	0	0	0.000122454	0	0	0	0	0	0	0	0	0	0.000122454	0	0	0	0	0	0	0	0	0	0	0	0	0	0
108	1	108	0	0	0	1	0	0	0	0	0	0	2140000	2160000	0	0	0	5.21118e-06	0	0	0	0	0	0	0	0	0	0	0	0	0	0	0	1.35575e-06	1.35575e-06	0	0	0	0	0	0	0	0	0	0	0	0	0	0
109	1	109	0	0	0	1	0	2	0	2	2	0	2160000	2180000	0	0	0	5.21118e-06	0	2.79357e-05	0	4.17179e-05	3.65303e-05	0	0	0	0	0	0	7.19677e-06	1.31478e-06	1.03578e-06	0	1.35575e-06	1.09031e-05	0	0	0	0	0	0	0	0	0	0	0	0	0	0
110	1	110	0	0	0	3	0	2	0	0	2	0	2180000	2200000	0	0	0	1.56335e-05	0	2.79357e-05	0	0	3.65303e-05	0	0	0	0	0	0	0	1.31478e-06	1.03578e-06	0	4.06725e-06	6.4178e-06	0	0	0	0	0	0	0	0	0	0	0	0	0	0
111	1	111	0	0	0	1	0	1	0	0	2	0	2200000	2220000	0	0	0	5.21118e-06	0	1.39678e-05	0	0	3.65303e-05	0	0	0	0	0	0	0	1.31478e-06	5.17889e-07	0	1.35575e-06	3.18841e-06	0	0	0	0	0	0	0	0	0	0	0	0	0	0
112	1	112	0	0	0	2	0	3	0	0	1	0	2220000	2240000	0	0	0	1.04224e-05	0	4.19035e-05	0	0	1.82652e-05	0	0	0	0	0	0	0	6.57388e-07	1.55367e-06	0	2.7115e-06	4.92255e-06	0	0	0	0	0	0	0	0	0	0	0	0	0	0
113	1	113	0	0	0	0	0	1	0	0	0	0	2240000	2260000	0	0	0	0	0	1.39678e-05	0	0	0	0	0	0	0	0	0	0	0	5.17889e-07	0	0	5.17889e-07	0	0	0	0	0	0	0	0	0	0	0	0	0	0
114	1	114	0	0	0	0	0	0	4	0	0	0	2260000	2280000	0	0	0	0	0	0	4.66597e-05	0	0	0	0	0	0	0	0	0	0	0	2.44663e-06	0	2.44663e-06	0	0	0	0	0	0	0	0	0	0	0	0	0	0
115	1	115	0	0	0	0	1	0	0	0	0	8	2280000	2300000	0	0	0	0	4.48209e-05	0	0	0	0	0.00117959	0	0	0	0.000155181	5.43748e-06	0	0	0	0	0	0.000160618	0	0	0	0	0	0	0	0	0	1	0	0	0	0
116	1	116	0	0	0	1	0	2	0	0	0	0	2300000	2320000	0	0	0	5.21118e-06	0	2.79357e-05	0	0	0	0	0	0	0	0	0	0	0	1.03578e-06	0	1.35575e-06	2.39153e-06	0	0	0	0	0	0	0	0	0	0	0	0	0	0
117	1	117	0	0	0	0	0	0	0	0	0	0	2320000	2340000	0	0	0	0	0	0	0	0	0	0	0	0	0	0	0	0	0	0	0	0	0	0	0	0	0	0	0	0	0	0	0	0	0	0	0
118	1	118	0	0	0	0	0	2	2	0	0	0	2340000	2360000	0	0	0	0	0	2.79357e-05	2.33299e-05	0	0	0	0	0	0	0	0	0	0	1.03578e-06	1.22332e-06	0	2.2591e-06	0	0	0	0	0	0	0	0	0	0	0	0	0	0
119	1	119	0	0	0	2	0	0	2	0	0	0	2360000	2380000	0	0	0	1.04224e-05	0	0	2.33299e-05	0	0	0	0	0	0	0	0	0	0	0	1.22332e-06	2.7115e-06	3.93481e-06	0	0	0	0	0	0	0	0	0	0	0	0	0	0
120	1	120	0	0	0	0	0	0	0	0	0	0	2380000	2400000	0	0	0	0	0	0	0	0	0	0	0	0	0	0	0	0	0	0	0	0	0	0	0	0	0	0	0	0	0	0	0	0	0	0	0
121	1	121	0	0	0	1	1	0	0	0	0	0	2400000	2420000	0	0	0	5.21118e-06	4.48209e-05	0	0	0	0	0	0	0	0	0	5.43748e-06	0	0	0	0	1.35575e-06	6.79323e-06	0	0	0	0	0	0	0	0	0	0	0	0	0	0
122	1	122	0	0	0	0	0	2	0	1	1	0	2420000	2440000	0	0	0	0	0	2.79357e-05	0	2.0859e-05	1.82652e-05	0	0	0	0	0	0	3.59838e-06	6.57388e-07	1.03578e-06	0	0	5.29155e-06	0	0	0	0	0	0	0	0	0	0	0	0	0	0
123	1	123	0	0	0	0	0	1	0	0	1	0	2440000	2460000	0	0	0	0	0	1.39678e-05	0	0	1.82652e-05	0	0	0	0	0	0	0	6.57388e-07	5.17889e-07	0	0	1.17528e-06	0	0	0	0	0	0	0	0	0	0	0	0	0	0
124	1	124	0	0	0	0	0	2	4	0	0	0	2460000	2480000	0	0	0	0	0	2.79357e-05	4.66597e-05	0	0	0	0	0	0	0	0	0	0	1.03578e-06	2.44663e-06	0	3.48241e-06	0	0	0	0	0	0	0	0	0	0	0	0	0	0
125	1	125	0	0	0	2	0	2	0	0	1	0	2480000	2500000	0	0	0	1.04224e-05	0	2.79357e-05	0	0	1.82652e-05	0	0	0	0	0	0	0	6.57388e-07	1.03578e-06	0	2.7115e-06	4.40466e-06	0	0	0	0	0	0	0	0	0	0	0	0	0	0
126	1	126	0	0	0	1	0	0	0	0	3	0	2500000	2520000	0	0	0	5.21118e-06	0	0	0	0	5.47955e-05	0	0	0	0	0	0	0	1.97216e-06	0	0	1.35575e-06	3.32791e-06	0	0	0	0	0	0	0	0	0	0	0	0	0	0
127	1	127	0	0	0	1	0	0	0	0	0	0	2520000	2540000	0	0	0	5.21118e-06	0	0	0	0	0	0	0	0	0	0	0	0	0	0	0	1.35575e-06	1.35575e-06	0	0	0	0	0	0	0	0	0	0	0	0	0	0
128	1	128	0	0	0	0	1	0	1	0	0	0	2540000	2560000	0	0	0	0	4.48209e-05	0	1.16649e-05	0	0	0	0	0	0	0	5.43748e-06	0	0	0	6.11658e-07	0	6.04913e-06	0	0	0	0	0	0	0	0	0	0	0	0	0	0
129	1	129	0	0	0	2	0	0	0	0	0	0	2560000	2580000	0	0	0	1.04224e-05	0	0	0	0	0	0	0	0	0	0	0	0	0	0	0	2.7115e-06	2.7115e-06	0	0	0	0	0	0	0	0	0	0	0	0	0	0
130	1	130	0	0	0	0	0	0	0	1	0	0	2580000	2600000	0	0	0	0	0	0	0	2.0859e-05	0	0	0	0	0	0	0	3.59838e-06	0	0	0	0	3.59838e-06	0	0	0	0	0	0	0	0	0	0	0	0	0	0
131	1	131	0	0	0	0	0	0	0	0	0	0	2600000	2620000	0	0	0	0	0	0	0	0	0	0	0	0	0	0	0	0	0	0	0	0	0	0	0	0	0	0	0	0	0	0	0	0	0	0	0
132	1	132	0	0	0	0	0	0	0	0	0	0	2620000	2640000	0	0	0	0	0	0	0	0	0	0	0	0	0	0	0	0	0	0	0	0	0	0	0	0	0	0	0	0	0	0	0	0	0	0	0
133	1	133	0	0	0	0	0	0	0	0	0	0	2640000	2660000	0	0	0	0	0	0	0	0	0	0	0	0	0	0	0	0	0	0	0	0	0	0	0	0	0	0	0	0	0	0	0	0	0	0	0
134	1	134	0	0	0	0	0	0	0	0	0	0	2660000	2680000	0	0	0	0	0	0	0	0	0	0	0	0	0	0	0	0	0	0	0	0	0	0	0	0	0	0	0	0	0	0	0	0	0	0	0
135	1	135	0	0	0	0	0	0	2	0	3	0	2680000	2700000	0	0	0	0	0	0	2.33299e-05	0	5.47955e-05	0	0	0	0	0	0	0	1.97216e-06	0	1.22332e-06	0	3.19548e-06	0	0	0	0	0	0	0	0	0	0	0	0	0	0
136	1	136	0	0	0	0	0	0	1	0	0	0	2700000	2720000	0	0	0	0	0	0	1.16649e-05	0	0	0	0	0	0	0	0	0	0	0	6.11658e-07	0	6.11658e-07	0	0	0	0	0	0	0	0	0	0	0	0	0	0
137	1	137	0	0	0	0	0	0	0	0	0	0	2720000	2740000	0	0	0	0	0	0	0	0	0	0	0	0	0	0	0	0	0	0	0	0	0	0	0	0	0	0	0	0	0	0	0	0	0	0	0
138	1	138	0	0	0	0	0	0	0	0	0	0	2740000	2760000	0	0	0	0	0	0	0	0	0	0	0	0	0	0	0	0	0	0	0	0	0	0	0	0	0	0	0	0	0	0	0	0	0	0	0
139	1	139	0	0	0	0	1	4	3	0	0	0	2760000	2780000	0	0	0	0	4.48209e-05	5.58714e-05	3.49948e-05	0	0	0	0	0	0	0	5.43748e-06	0	0	2.07156e-06	1.83497e-06	0	9.34401e-06	0	0	0	0	0	0	0	0	0	0	0	0	0	0
140	1	140	0	0	0	1	0	0	0	0	0	0	2780000	2800000	0	0	0	5.21118e-06	0	0	0	0	0	0	0	0	0	0	0	0	0	0	0	1.35575e-06	1.35575e-06	0	0	0	0	0	0	0	0	0	0	0	0	0	0
141	1	141	0	0	0	1	0	0	0	0	0	0	2800000	2820000	0	0	0	5.21118e-06	0	0	0	0	0	0	0	0	0	0	0	0	0	0	0	1.35575e-06	1.35575e-06	0	0	0	0	0	0	0	0	0	0	0	0	0	0
142	1	142	0	0	0	0	0	0	0	0	0	0	2820000	2840000	0	0	0	0	0	0	0	0	0	0	0	0	0	0	0	0	0	0	0	0	0	0	0	0	0	0	0	0	0	0	0	0	0	0	0
143	1	143	0	0	0	0	1	0	0	0	0	0	2840000	2860000	0	0	0	0	4.48209e-05	0	0	0	0	0	0	0	0	0	5.43748e-06	0	0	0	0	0	5.43748e-06	0	0	0	0	0	0	0	0	0	0	0	0	0	0
144	1	144	0	0	0	0	1	0	0	0	0	0	2860000	2880000	0	0	0	0	4.48209e-05	0	0	0	0	0	0	0	0	0	5.43748e-06	0	0	0	0	0	5.43748e-06	0	0	0	0	0	0	0	0	0	0	0	0	0	0
145	1	145	0	0	0	3	1	0	0	0	0	0	2880000	2900000	0	0	0	1.56335e-05	4.48209e-05	0	0	0	0	0	0	0	0	0	5.43748e-06	0	0	0	0	4.06725e-06	9.50472e-06	0	0	0	0	0	0	0	0	0	0	0	0	0	0
146	1	146	0	0	0	0	0	0	0	1	0	0	2900000	2920000	0	0	0	0	0	0	0	2.0859e-05	0	0	0	0	0	0	0	3.59838e-06	0	0	0	0	3.59838e-06	0	0	0	0	0	0	0	0	0	0	0	0	0	0
147	1	147	0	0	0	0	0	0	0	0	2	0	2920000	2940000	0	0	0	0	0	0	0	0	3.65303e-05	0	0	0	0	0	0	0	1.31478e-06	0	0	0	1.31478e-06	0	0	0	0	0	0	0	0	0	0	0	0	0	0
148	1	148	0	0	0	0	0	0	1	1	0	0	2940000	2960000	0	0	0	0	0	0	1.16649e-05	2.0859e-05	0	0	0	0	0	0	0	3.59838e-06	0	0	6.11658e-07	0	4.21004e-06	0	0	0	0	0	0	0	0	0	0	0	0	0	0
149	1	149	0	0	0	1	0	0	0	0	0	0	2960000	2980000	0	0	0	5.21118e-06	0	0	0	0	0	0	0	0	0	0	0	0	0	0	0	1.35575e-06	1.35575e-06	0	0	0	0	0	0	0	0	0	0	0	0	0	0
150	1	150	0	0	0	0	0	1	0	0	0	0	2980000	3000000	0	0	0	0	0	1.39678e-05	0	0	0	0	0	0	0	0	0	0	0	5.17889e-07	0	0	5.17889e-07	0	0	0	0	0	0	0	0	0	0	0	0	0	0
151	1	151	0	0	0	3	0	0	0	0	0	0	3000000	3020000	0	0	0	1.56335e-05	0	0	0	0	0	0	0	0	0	0	0	0	0	0	0	4.06725e-06	4.06725e-06	0	0	0	0	0	0	0	0	0	0	0	0	0	0
152	1	152	0	0	0	0	0	0	0	0	0	0	3020000	3040000	0	0	0	0	0	0	0	0	0	0	0	0	0	0	0	0	0	0	0	0	0	0	0	0	0	0	0	0	0	0	0	0	0	0	0
153	1	153	0	0	0	0	0	0	0	0	0	0	3040000	3060000	0	0	0	0	0	0	0	0	0	0	0	0	0	0	0	0	0	0	0	0	0	0	0	0	0	0	0	0	0	0	0	0	0	0	0
154	1	154	0	0	0	0	0	0	0	0	0	0	3060000	3080000	0	0	0	0	0	0	0	0	0	0	0	0	0	0	0	0	0	0	0	0	0	0	0	0	0	0	0	0	0	0	0	0	0	0	0
155	1	155	0	0	0	3	1	0	4	2	0	0	3080000	3100000	0	0	0	1.56335e-05	4.48209e-05	0	4.66597e-05	4.17179e-05	0	0	0	0	0	0	5.43748e-06	7.19677e-06	0	0	2.44663e-06	4.06725e-06	1.91481e-05	0	0	0	0	0	0	0	0	0	0	0	0	0	0
156	1	156	0	0	0	0	0	0	0	0	0	0	3100000	3120000	0	0	0	0	0	0	0	0	0	0	0	0	0	0	0	0	0	0	0	0	0	0	0	0	0	0	0	0	0	0	0	0	0	0	0
157	1	157	0	0	0	0	0	0	0	0	0	0	3120000	3140000	0	0	0	0	0	0	0	0	0	0	0	0	0	0	0	0	0	0	0	0	0	0	0	0	0	0	0	0	0	0	0	0	0	0	0
158	1	158	0	0	0	0	0	0	0	1	0	0	3140000	3160000	0	0	0	0	0	0	0	2.0859e-05	0	0	0	0	0	0	0	3.59838e-06	0	0	0	0	3.59838e-06	0	0	0	0	0	0	0	0	0	0	0	0	0	0
159	1	159	0	0	0	0	0	0	0	0	0	0	3160000	3180000	0	0	0	0	0	0	0	0	0	0	0	0	0	0	0	0	0	0	0	0	0	0	0	0	0	0	0	0	0	0	0	0	0	0	0
160	1	160	0	0	0	0	0	1	0	0	0	0	3180000	3200000	0	0	0	0	0	1.39678e-05	0	0	0	0	0	0	0	0	0	0	0	5.17889e-07	0	0	5.17889e-07	0	0	0	0	0	0	0	0	0	0	0	0	0	0
161	1	161	0	0	0	0	0	0	3	1	1	0	3200000	3220000	0	0	0	0	0	0	3.49948e-05	2.0859e-05	1.82652e-05	0	0	0	0	0	0	3.59838e-06	6.57388e-07	0	1.83497e-06	0	6.09075e-06	0	0	0	0	0	0	0	0	0	0	0	0	0	0
162	1	162	0	0	0	0	0	0	4	0	0	0	3220000	3240000	0	0	0	0	0	0	4.66597e-05	0	0	0	0	0	0	0	0	0	0	0	2.44663e-06	0	2.44663e-06	0	0	0	0	0	0	0	0	0	0	0	0	0	0
163	1	163	0	0	0	0	0	0	1	0	0	0	3240000	3260000	0	0	0	0	0	0	1.16649e-05	0	0	0	0	0	0	0	0	0	0	0	6.11658e-07	0	6.11658e-07	0	0	0	0	0	0	0	0	0	0	0	0	0	0
164	1	164	0	0	0	0	0	0	0	0	0	0	3260000	3280000	0	0	0	0	0	0	0	0	0	0	0	0	0	0	0	0	0	0	0	0	0	0	0	0	0	0	0	0	0	0	0	0	0	0	0
165	1	165	0	0	0	0	0	0	1	0	0	0	3280000	3300000	0	0	0	0	0	0	1.16649e-05	0	0	0	0	0	0	0	0	0	0	0	6.11658e-07	0	6.11658e-07	0	0	0	0	0	0	0	0	0	0	0	0	0	0
166	1	166	0	0	0	0	0	0	0	0	0	0	3300000	3320000	0	0	0	0	0	0	0	0	0	0	0	0	0	0	0	0	0	0	0	0	0	0	0	0	0	0	0	0	0	0	0	0	0	0	0
167	1	167	0	0	0	0	1	0	0	0	0	0	3320000	3340000	0	0	0	0	4.48209e-05	0	0	0	0	0	0	0	0	0	5.43748e-06	0	0	0	0	0	5.43748e-06	0	0	0	0	0	0	0	0	0	0	0	0	0	0
168	1	168	0	0	0	3	0	0	1	0	0	0	3340000	3360000	0	0	0	1.56335e-05	0	0	1.16649e-05	0	0	0	0	0	0	0	0	0	0	0	6.11658e-07	4.06725e-06	4.6789e-06	0	0	0	0	0	0	0	0	0	0	0	0	0	0
169	1	169	0	0	0	0	0	0	0	0	0	0	3360000	3380000	0	0	0	0	0	0	0	0	0	0	0	0	0	0	0	0	0	0	0	0	0	0	0	0	0	0	0	0	0	0	0	0	0	0	0
170	1	170	0	0	0	3	0	0	0	0	2	0	3380000	3400000	0	0	0	1.56335e-05	0	0	0	0	3.65303e-05	0	0	0	0	0	0	0	1.31478e-06	0	0	4.06725e-06	5.38202e-06	0	0	0	0	0	0	0	0	0	0	0	0	0	0
171	1	171	0	0	0	0	0	0	1	0	0	0	3400000	3420000	0	0	0	0	0	0	1.16649e-05	0	0	0	0	0	0	0	0	0	0	0	6.11658e-07	0	6.11658e-07	0	0	0	0	0	0	0	0	0	0	0	0	0	0
172	1	172	0	0	0	2	0	0	2	0	0	0	3420000	3440000	0	0	0	1.04224e-05	0	0	2.33299e-05	0	0	0	0	0	0	0	0	0	0	0	1.22332e-06	2.7115e-06	3.93481e-06	0	0	0	0	0	0	0	0	0	0	0	0	0	0
173	1	173	0	0	0	0	0	0	0	0	0	0	3440000	3460000	0	0	0	0	0	0	0	0	0	0	0	0	0	0	0	0	0	0	0	0	0	0	0	0	0	0	0	0	0	0	0	0	0	0	0
174	1	174	0	0	0	0	0	0	2	0	0	0	3460000	3480000	0	0	0	0	0	0	2.33299e-05	0	0	0	0	0	0	0	0	0	0	0	1.22332e-06	0	1.22332e-06	0	0	0	0	0	0	0	0	0	0	0	0	0	0
175	1	175	0	0	0	0	1	1	0	0	0	1	3480000	3500000	0	0	0	0	4.48209e-05	1.39678e-05	0	0	0	0.000147449	0	0	0	1.93976e-05	5.43748e-06	0	0	5.17889e-07	0	0	2.5353e-05	0	0	0	0	0	0	0	0	0	0	0	0	0	0
176	1	176	0	0	0	0	0	0	1	0	2	0	3500000	3520000	0	0	0	0	0	0	1.16649e-05	0	3.65303e-05	0	0	0	0	0	0	0	1.31478e-06	0	6.11658e-07	0	1.92643e-06	0	0	0	0	0	0	0	0	0	0	0	0	0	0
177	1	177	0	0	0	3	0	0	1	0	2	0	3520000	3540000	0	0	0	1.56335e-05	0	0	1.16649e-05	0	3.65303e-05	0	0	0	0	0	0	0	1.31478e-06	0	6.11658e-07	4.06725e-06	5.99368e-06	0	0	0	0	0	0	0	0	0	0	0	0	0	0
178	1	178	0	0	0	1	0	0	1	0	0	0	3540000	3560000	0	0	0	5.21118e-06	0	0	1.16649e-05	0	0	0	0	0	0	0	0	0	0	0	6.11658e-07	1.35575e-06	1.96741e-06	0	0	0	0	0	0	0	0	0	0	0	0	0	0
179	1	179	0	0	0	0	0	2	0	0	0	0	3560000	3580000	0	0	0	0	0	2.79357e-05	0	0	0	0	0	0	0	0	0	0	0	1.03578e-06	0	0	1.03578e-06	0	0	0	0	0	0	0	0	0	0	0	0	0	0
180	1	180	0	0	0	0	0	0	1	1	1	0	3580000	3600000	0	0	0	0	0	0	1.16649e-05	2.0859e-05	1.82652e-05	0	0	0	0	0	0	3.59838e-06	6.57388e-07	0	6.11658e-07	0	4.86743e-06	0	0	0	0	0	0	0	0	0	0	0	0	0	0
181	1	181	0	0	0	0	0	1	0	0	0	0	3600000	3620000	0	0	0	0	0	1.39678e-05	0	0	0	0	0	0	0	0	0	0	0	5.17889e-07	0	0	5.17889e-07	0	0	0	0	0	0	0	0	0	0	0	0	0	0
182	1	182	0	0	0	1	0	2	0	0	0	0	3620000	3640000	0	0	0	5.21118e-06	0	2.79357e-05	0	0	0	0	0	0	0	0	0	0	0	1.03578e-06	0	1.35575e-06	2.39153e-06	0	0	0	0	0	0	0	0	0	0	0	0	0	0
183	1	183	0	0	0	0	0	1	0	0	0	0	3640000	3660000	0	0	0	0	0	1.39678e-05	0	0	0	0	0	0	0	0	0	0	0	5.17889e-07	0	0	5.17889e-07	0	0	0	0	0	0	0	0	0	0	0	0	0	0
184	1	184	0	0	0	1	0	0	0	0	0	0	3660000	3680000	0	0	0	5.21118e-06	0	0	0	0	0	0	0	0	0	0	0	0	0	0	0	1.35575e-06	1.35575e-06	0	0	0	0	0	0	0	0	0	0	0	0	0	0
185	1	185	0	0	0	0	0	1	1	0	0	0	3680000	3700000	0	0	0	0	0	1.39678e-05	1.16649e-05	0	0	0	0	0	0	0	0	0	0	5.17889e-07	6.11658e-07	0	1.12955e-06	0	0	0	0	0	0	0	0	0	0	0	0	0	0
186	1	186	0	0	0	0	0	0	0	0	2	0	3700000	3720000	0	0	0	0	0	0	0	0	3.65303e-05	0	0	0	0	0	0	0	1.31478e-06	0	0	0	1.31478e-06	0	0	0	0	0	0	0	0	0	0	0	0	0	0
187	1	187	0	0	0	0	0	0	1	0	0	0	3720000	3740000	0	0	0	0	0	0	1.16649e-05	0	0	0	0	0	0	0	0	0	0	0	6.11658e-07	0	6.11658e-07	0	0	0	0	0	0	0	0	0	0	0	0	0	0
188	1	188	0	0	0	2	0	0	0	0	0	0	3740000	3760000	0	0	0	1.04224e-05	0	0	0	0	0	0	0	0	0	0	0	0	0	0	0	2.7115e-06	2.7115e-06	0	0	0	0	0	0	0	0	0	0	0	0	0	0
189	1	189	0	0	0	0	0	0	0	0	0	0	3760000	3780000	0	0	0	0	0	0	0	0	0	0	0	0	0	0	0	0	0	0	0	0	0	0	0	0	0	0	0	0	0	0	0	0	0	0	0
190	1	190	0	0	0	0	0	0	0	0	0	0	3780000	3800000	0	0	0	0	0	0	0	0	0	0	0	0	0	0	0	0	0	0	0	0	0	0	0	0	0	0	0	0	0	0	0	0	0	0	0
191	1	191	0	0	0	3	1	0	0	0	0	0	3800000	3820000	0	0	0	1.56335e-05	4.48209e-05	0	0	0	0	0	0	0	0	0	5.43748e-06	0	0	0	0	4.06725e-06	9.50472e-06	0	0	0	0	0	0	0	0	0	0	0	0	0	0
192	1	192	0	0	0	0	0	0	2	0	2	1	3820000	3840000	0	0	0	0	0	0	2.33299e-05	0	3.65303e-05	0.000147449	0	0	0	1.93976e-05	0	0	1.31478e-06	0	1.22332e-06	0	2.19357e-05	0	0	0	0	0	0	0	0	0	0	0	0	0	0
193	1	193	0	0	0	0	0	0	0	0	0	0	3840000	3860000	0	0	0	0	0	0	0	0	0	0	0	0	0	0	0	0	0	0	0	0	0	0	0	0	0	0	0	0	0	0	0	0	0	0	0
194	1	194	0	0	0	0	0	0	0	0	0	0	3860000	3880000	0	0	0	0	0	0	0	0	0	0	0	0	0	0	0	0	0	0	0	0	0	0	0	0	0	0	0	0	0	0	0	0	0	0	0
195	1	195	0	0	0	0	0	0	0	0	0	0	3880000	3900000	0	0	0	0	0	0	0	0	0	0	0	0	0	0	0	0	0	0	0	0	0	0	0	0	0	0	0	0	0	0	0	0	0	0	0
196	1	196	0	0	0	0	0	0	0	0	0	0	3900000	3920000	0	0	0	0	0	0	0	0	0	0	0	0	0	0	0	0	0	0	0	0	0	0	0	0	0	0	0	0	0	0	0	0	0	0	0
197	1	197	0	0	0	0	0	0	0	0	0	0	3920000	3940000	0	0	0	0	0	0	0	0	0	0	0	0	0	0	0	0	0	0	0	0	0	0	0	0	0	0	0	0	0	0	0	0	0	0	0
198	1	198	0	0	0	0	0	0	0	0	0	0	3940000	3960000	0	0	0	0	0	0	0	0	0	0	0	0	0	0	0	0	0	0	0	0	0	0	0	0	0	0	0	0	0	0	0	0	0	0	0
199	1	199	0	0	0	0	0	0	0	0	0	0	3960000	3980000	0	0	0	0	0	0	0	0	0	0	0	0	0	0	0	0	0	0	0	0	0	0	0	0	0	0	0	0	0	0	0	0	0	0	0
200	1	200	1	0	0	0	0	1	0	0	2	0	3980000	4000000	0.000429923	0	0	0	0	1.39678e-05	0	0	3.65303e-05	0	6.1227e-05	0	0	0	0	0	1.31478e-06	5.17889e-07	0	0	6.30596e-05	0	0	0	0	0	0	0	0	0	0	0	0	0	0
201	1	201	0	0	0	0	0	0	0	0	0	0	4000000	4020000	0	0	0	0	0	0	0	0	0	0	0	0	0	0	0	0	0	0	0	0	0	0	0	0	0	0	0	0	0	0	0	0	0	0	0
202	1	202	0	0	0	0	0	0	0	2	0	0	4020000	4040000	0	0	0	0	0	0	0	4.17179e-05	0	0	0	0	0	0	0	7.19677e-06	0	0	0	0	7.19677e-06	0	0	0	0	0	0	0	0	0	0	0	0	0	0
203	1	203	0	0	0	0	0	3	0	0	1	0	4040000	4060000	0	0	0	0	0	4.19035e-05	0	0	1.82652e-05	0	0	0	0	0	0	0	6.57388e-07	1.55367e-06	0	0	2.21106e-06	0	0	0	0	0	0	0	0	0	0	0	0	0	0
204	1	204	0	0	0	0	0	1	0	1	0	0	4060000	4080000	0	0	0	0	0	1.39678e-05	0	2.0859e-05	0	0	0	0	0	0	0	3.59838e-06	0	5.17889e-07	0	0	4.11627e-06	0	0	0	0	0	0	0	0	0	0	0	0	0	0
205	1	205	0	0	0	1	0	0	2	6	0	0	4080000	4100000	0	0	0	5.21118e-06	0	0	2.33299e-05	0.000125154	0	0	0	0	0	0	0	2.15903e-05	0	0	1.22332e-06	1.35575e-06	2.41694e-05	0	0	0	0	0	0	0	0	0	0	0	0	0	0
206	1	206	0	1	0	2	0	0	0	0	0	0	4100000	4120000	0	0.000392773	0	1.04224e-05	0	0	0	0	0	0	0	0	2.68104e-06	0	0	0	0	0	0	2.7115e-06	5.39254e-06	0	0	0	0	0	0	0	0	0	0	0	0	0	0
207	1	207	0	0	0	0	0	0	0	0	0	0	4120000	4140000	0	0	0	0	0	0	0	0	0	0	0	0	0	0	0	0	0	0	0	0	0	0	0	0	0	0	0	0	0	0	0	0	0	0	0
208	1	208	0	0	0	0	0	4	0	0	1	0	4140000	4160000	0	0	0	0	0	5.58714e-05	0	0	1.82652e-05	0	0	0	0	0	0	0	6.57388e-07	2.07156e-06	0	0	2.72895e-06	0	0	0	0	0	0	0	0	0	0	0	0	0	0
209	1	209	0	0	0	0	0	0	0	5	0	0	4160000	4180000	0	0	0	0	0	0	0	0.000104295	0	0	0	0	0	0	0	1.79919e-05	0	0	0	0	1.79919e-05	0	0	0	0	0	0	0	0	0	0	0	0	0	0
210	1	210	0	0	0	0	0	0	6	0	0	1	4180000	4200000	0	0	0	0	0	0	6.99896e-05	0	0	0.000147449	0	0	0	1.93976e-05	0	0	0	0	3.66995e-06	0	2.30675e-05	0	0	0	0	0	0	0	0	0	0	0	0	0	0
211	1	211	0	0	0	4	0	0	1	0	0	0	4200000	4220000	0	0	0	2.08447e-05	0	0	1.16649e-05	0	0	0	0	0	0	0	0	0	0	0	6.11658e-07	5.42299e-06	6.03465e-06	0	0	0	0	0	0	0	0	0	0	0	0	0	0
212	1	212	0	0	0	1	0	4	0	0	1	0	4220000	4240000	0	0	0	5.21118e-06	0	5.58714e-05	0	0	1.82652e-05	0	0	0	0	0	0	0	6.57388e-07	2.07156e-06	0	1.35575e-06	4.08469e-06	0	0	0	0	0	0	0	0	0	0	0	0	0	0
213	1	213	0	0	0	1	0	0	2	0	0	0	4240000	4260000	0	0	0	5.21118e-06	0	0	2.33299e-05	0	0	0	0	0	0	0	0	0	0	0	1.22332e-06	1.35575e-06	2.57906e-06	0	0	0	0	0	0	0	0	0	0	0	0	0	0
214	1	214	0	0	0	2	0	0	2	0	0	0	4260000	4280000	0	0	0	1.04224e-05	0	0	2.33299e-05	0	0	0	0	0	0	0	0	0	0	0	1.22332e-06	2.7115e-06	3.93481e-06	0	0	0	0	0	0	0	0	0	0	0	0	0	0
215	1	215	0	1	0	0	0	2	0	0	0	0	4280000	4300000	0	0.000392773	0	0	0	2.79357e-05	0	0	0	0	0	0	2.68104e-06	0	0	0	0	1.03578e-06	0	0	3.71682e-06	0	0	0	0	0	0	0	0	0	0	0	0	0	0
216	1	216	0	0	0	1	0	0	0	0	0	0	4300000	4320000	0	0	0	5.21118e-06	0	0	0	0	0	0	0	0	0	0	0	0	0	0	0	1.35575e-06	1.35575e-06	0	0	0	0	0	0	0	0	0	0	0	0	0	0
217	1	217	0	0	0	2	0	0	0	0	0	0	4320000	4340000	0	0	0	1.04224e-05	0	0	0	0	0	0	0	0	0	0	0	0	0	0	0	2.7115e-06	2.7115e-06	0	0	0	0	0	0	0	0	0	0	0	0	0	0
218	1	218	0	0	0	0	0	0	0	0	0	0	4340000	4360000	0	0	0	0	0	0	0	0	0	0	0	0	0	0	0	0	0	0	0	0	0	0	0	0	0	0	0	0	0	0	0	0	0	0	0
219	1	219	0	0	0	8	1	0	0	0	0	0	4360000	4380000	0	0	0	4.16895e-05	4.48209e-05	0	0	0	0	0	0	0	0	0	5.43748e-06	0	0	0	0	1.0846e-05	1.62835e-05	0	0	0	0	0	0	0	0	0	0	0	0	0	0
220	1	220	0	0	0	2	1	0	0	0	0	0	4380000	4400000	0	0	0	1.04224e-05	4.48209e-05	0	0	0	0	0	0	0	0	0	5.43748e-06	0	0	0	0	2.7115e-06	8.14897e-06	0	0	0	0	0	0	0	0	0	0	0	0	0	0
221	1	221	0	0	0	2	1	0	1	0	0	0	4400000	4420000	0	0	0	1.04224e-05	4.48209e-05	0	1.16649e-05	0	0	0	0	0	0	0	5.43748e-06	0	0	0	6.11658e-07	2.7115e-06	8.76063e-06	0	0	0	0	0	0	0	0	0	0	0	0	0	0
222	1	222	0	0	0	1	0	0	0	0	0	0	4420000	4440000	0	0	0	5.21118e-06	0	0	0	0	0	0	0	0	0	0	0	0	0	0	0	1.35575e-06	1.35575e-06	0	0	0	0	0	0	0	0	0	0	0	0	0	0
223	1	223	0	0	0	0	0	0	1	0	0	0	4440000	4460000	0	0	0	0	0	0	1.16649e-05	0	0	0	0	0	0	0	0	0	0	0	6.11658e-07	0	6.11658e-07	0	0	0	0	0	0	0	0	0	0	0	0	0	0
224	1	224	0	0	0	0	0	0	1	0	0	0	4460000	4480000	0	0	0	0	0	0	1.16649e-05	0	0	0	0	0	0	0	0	0	0	0	6.11658e-07	0	6.11658e-07	0	0	0	0	0	0	0	0	0	0	0	0	0	0
225	1	225	0	0	0	2	0	0	1	0	0	0	4480000	4500000	0	0	0	1.04224e-05	0	0	1.16649e-05	0	0	0	0	0	0	0	0	0	0	0	6.11658e-07	2.7115e-06	3.32315e-06	0	0	0	0	0	0	0	0	0	0	0	0	0	0
226	1	226	0	0	0	0	0	1	0	0	0	0	4500000	4520000	0	0	0	0	0	1.39678e-05	0	0	0	0	0	0	0	0	0	0	0	5.17889e-07	0	0	5.17889e-07	0	0	0	0	0	0	0	0	0	0	0	0	0	0
227	1	227	0	0	0	0	0	0	0	0	0	0	4520000	4540000	0	0	0	0	0	0	0	0	0	0	0	0	0	0	0	0	0	0	0	0	0	0	0	0	0	0	0	0	0	0	0	0	0	0	0
228	1	228	0	0	0	0	0	0	2	0	0	0	4540000	4560000	0	0	0	0	0	0	2.33299e-05	0	0	0	0	0	0	0	0	0	0	0	1.22332e-06	0	1.22332e-06	0	0	0	0	0	0	0	0	0	0	0	0	0	0
229	1	229	0	0	0	2	0	0	1	0	0	0	4560000	4580000	0	0	0	1.04224e-05	0	0	1.16649e-05	0	0	0	0	0	0	0	0	0	0	0	6.11658e-07	2.7115e-06	3.32315e-06	0	0	0	0	0	0	0	0	0	0	0	0	0	0
230	1	230	0	0	0	0	0	0	3	0	1	0	4580000	4600000	0	0	0	0	0	0	3.49948e-05	0	1.82652e-05	0	0	0	0	0	0	0	6.57388e-07	0	1.83497e-06	0	2.49236e-06	0	0	0	0	0	0	0	0	0	0	0	0	0	0
231	1	231	0	0	0	0	0	0	0	0	0	0	4600000	4620000	0	0	0	0	0	0	0	0	0	0	0	0	0	0	0	0	0	0	0	0	0	0	0	0	0	0	0	0	0	0	0	0	0	0	0
232	1	232	0	0	0	2	0	0	0	0	0	0	4620000	4640000	0	0	0	1.04224e-05	0	0	0	0	0	0	0	0	0	0	0	0	0	0	0	2.7115e-06	2.7115e-06	0	0	0	0	0	0	0	0	0	0	0	0	0	0
233	1	233	0	0	0	1	0	0	0	0	0	0	4640000	4660000	0	0	0	5.21118e-06	0	0	0	0	0	0	0	0	0	0	0	0	0	0	0	1.35575e-06	1.35575e-06	0	0	0	0	0	0	0	0	0	0	0	0	0	0
234	1	234	0	0	0	2	0	0	0	2	0	0	4660000	4680000	0	0	0	1.04224e-05	0	0	0	4.17179e-05	0	0	0	0	0	0	0	7.19677e-06	0	0	0	2.7115e-06	9.90826e-06	0	0	0	0	0	0	0	0	0	0	0	0	0	0
235	1	235	0	0	0	0	0	0	2	4	0	0	4680000	4700000	0	0	0	0	0	0	2.33299e-05	8.34359e-05	0	0	0	0	0	0	0	1.43935e-05	0	0	1.22332e-06	0	1.56168e-05	0	0	0	0	0	0	0	0	0	0	0	0	0	0
236	1	236	0	0	0	0	0	0	0	0	0	0	4700000	4720000	0	0	0	0	0	0	0	0	0	0	0	0	0	0	0	0	0	0	0	0	0	0	0	0	0	0	0	0	0	0	0	0	0	0	0
237	1	237	0	0	0	1	0	0	0	0	0	0	4720000	4740000	0	0	0	5.21118e-06	0	0	0	0	0	0	0	0	0	0	0	0	0	0	0	1.35575e-06	1.35575e-06	0	0	0	0	0	0	0	0	0	0	0	0	0	0
238	1	238	0	0	0	0	0	0	0	0	0	0	4740000	4760000	0	0	0	0	0	0	0	0	0	0	0	0	0	0	0	0	0	0	0	0	0	0	0	0	0	0	0	0	0	0	0	0	0	0	0
239	1	239	0	0	0	1	0	0	0	0	0	0	4760000	4780000	0	0	0	5.21118e-06	0	0	0	0	0	0	0	0	0	0	0	0	0	0	0	1.35575e-06	1.35575e-06	0	0	0	0	0	0	0	0	0	0	0	0	0	0
240	1	240	0	0	0	0	0	0	0	0	0	0	4780000	4800000	0	0	0	0	0	0	0	0	0	0	0	0	0	0	0	0	0	0	0	0	0	0	0	0	0	0	0	0	0	0	0	0	0	0	0
241	1	241	0	0	0	2	0	0	0	0	0	0	4800000	4820000	0	0	0	1.04224e-05	0	0	0	0	0	0	0	0	0	0	0	0	0	0	0	2.7115e-06	2.7115e-06	0	0	0	0	0	0	0	0	0	0	0	0	0	0
242	1	242	0	0	0	0	0	0	2	0	2	0	4820000	4840000	0	0	0	0	0	0	2.33299e-05	0	3.65303e-05	0	0	0	0	0	0	0	1.31478e-06	0	1.22332e-06	0	2.53809e-06	0	0	0	0	0	0	0	0	0	0	0	0	0	0
243	1	243	0	0	0	0	0	0	0	0	0	0	4840000	4860000	0	0	0	0	0	0	0	0	0	0	0	0	0	0	0	0	0	0	0	0	0	0	0	0	0	0	0	0	0	0	0	0	0	0	0
244	1	244	0	0	0	0	0	0	1	0	0	0	4860000	4880000	0	0	0	0	0	0	1.16649e-05	0	0	0	0	0	0	0	0	0	0	0	6.11658e-07	0	6.11658e-07	0	0	0	0	0	0	0	0	0	0	0	0	0	0
245	1	245	0	0	0	0	0	0	0	0	1	0	4880000	4900000	0	0	0	0	0	0	0	0	1.82652e-05	0	0	0	0	0	0	0	6.57388e-07	0	0	0	6.57388e-07	0	0	0	0	0	0	0	0	0	0	0	0	0	0
246	1	246	0	0	0	0	0	2	0	0	0	0	4900000	4920000	0	0	0	0	0	2.79357e-05	0	0	0	0	0	0	0	0	0	0	0	1.03578e-06	0	0	1.03578e-06	0	0	0	0	0	0	0	0	0	0	0	0	0	0
247	1	247	0	0	0	0	0	0	0	0	0	0	4920000	4940000	0	0	0	0	0	0	0	0	0	0	0	0	0	0	0	0	0	0	0	0	0	0	0	0	0	0	0	0	0	0	0	0	0	0	0
248	1	248	0	0	0	0	2	0	0	0	0	0	4940000	4960000	0	0	0	0	8.96419e-05	0	0	0	0	0	0	0	0	0	1.0875e-05	0	0	0	0	0	1.0875e-05	0	0	0	0	0	0	0	0	0	0	0	0	0	0
249	1	249	0	0	0	0	0	0	0	0	0	0	4960000	4980000	0	0	0	0	0	0	0	0	0	0	0	0	0	0	0	0	0	0	0	0	0	0	0	0	0	0	0	0	0	0	0	0	0	0	0
250	1	250	0	0	0	0	0	0	0	0	0	0	4980000	5000000	0	0	0	0	0	0	0	0	0	0	0	0	0	0	0	0	0	0	0	0	0	0	0	0	0	0	0	0	0	0	0	0	0	0	0
251	1	251	0	0	0	0	0	0	0	0	0	0	5000000	5020000	0	0	0	0	0	0	0	0	0	0	0	0	0	0	0	0	0	0	0	0	0	0	0	0	0	0	0	0	0	0	0	0	0	0	0
252	1	252	0	0	0	0	0	0	0	0	2	0	5020000	5040000	0	0	0	0	0	0	0	0	3.65303e-05	0	0	0	0	0	0	0	1.31478e-06	0	0	0	1.31478e-06	0	0	0	0	0	0	0	0	0	0	0	0	0	0
253	1	253	0	0	0	0	0	0	0	0	0	0	5040000	5060000	0	0	0	0	0	0	0	0	0	0	0	0	0	0	0	0	0	0	0	0	0	0	0	0	0	0	0	0	0	0	0	0	0	0	0
254	1	254	0	0	0	1	0	0	0	0	2	0	5060000	5080000	0	0	0	5.21118e-06	0	0	0	0	3.65303e-05	0	0	0	0	0	0	0	1.31478e-06	0	0	1.35575e-06	2.67052e-06	0	0	0	0	0	0	0	0	0	0	0	0	0	0
255	1	255	0	0	0	0	0	1	0	0	0	0	5080000	5100000	0	0	0	0	0	1.39678e-05	0	0	0	0	0	0	0	0	0	0	0	5.17889e-07	0	0	5.17889e-07	0	0	0	0	0	0	0	0	0	0	0	0	0	0
256	1	256	0	0	0	3	0	0	0	0	0	0	5100000	5120000	0	0	0	1.56335e-05	0	0	0	0	0	0	0	0	0	0	0	0	0	0	0	4.06725e-06	4.06725e-06	0	0	0	0	0	0	0	0	0	0	0	0	0	0
257	1	257	0	0	0	0	0	0	0	0	0	0	5120000	5140000	0	0	0	0	0	0	0	0	0	0	0	0	0	0	0	0	0	0	0	0	0	0	0	0	0	0	0	0	0	0	0	0	0	0	0
258	1	258	0	0	0	0	0	0	0	0	1	0	5140000	5160000	0	0	0	0	0	0	0	0	1.82652e-05	0	0	0	0	0	0	0	6.57388e-07	0	0	0	6.57388e-07	0	0	0	0	0	0	0	0	0	0	0	0	0	0
259	1	259	0	0	0	1	0	0	0	0	0	0	5160000	5180000	0	0	0	5.21118e-06	0	0	0	0	0	0	0	0	0	0	0	0	0	0	0	1.35575e-06	1.35575e-06	0	0	0	0	0	0	0	0	0	0	0	0	0	0
260	1	260	0	0	0	1	0	0	2	0	2	0	5180000	5200000	0	0	0	5.21118e-06	0	0	2.33299e-05	0	3.65303e-05	0	0	0	0	0	0	0	1.31478e-06	0	1.22332e-06	1.35575e-06	3.89384e-06	0	0	0	0	0	0	0	0	0	0	0	0	0	0
261	1	261	0	0	0	0	0	0	2	0	0	0	5200000	5220000	0	0	0	0	0	0	2.33299e-05	0	0	0	0	0	0	0	0	0	0	0	1.22332e-06	0	1.22332e-06	0	0	0	0	0	0	0	0	0	0	0	0	0	0
262	1	262	0	0	0	1	0	0	0	0	1	0	5220000	5240000	0	0	0	5.21118e-06	0	0	0	0	1.82652e-05	0	0	0	0	0	0	0	6.57388e-07	0	0	1.35575e-06	2.01314e-06	0	0	0	0	0	0	0	0	0	0	0	0	0	0
263	1	263	0	0	0	0	0	1	0	0	1	0	5240000	5260000	0	0	0	0	0	1.39678e-05	0	0	1.82652e-05	0	0	0	0	0	0	0	6.57388e-07	5.17889e-07	0	0	1.17528e-06	0	0	0	0	0	0	0	0	0	0	0	0	0	0
264	1	264	0	0	0	0	0	0	1	0	0	0	5260000	5280000	0	0	0	0	0	0	1.16649e-05	0	0	0	0	0	0	0	0	0	0	0	6.11658e-07	0	6.11658e-07	0	0	0	0	0	0	0	0	0	0	0	0	0	0
265	1	265	0	0	0	1	0	0	0	0	0	0	5280000	5300000	0	0	0	5.21118e-06	0	0	0	0	0	0	0	0	0	0	0	0	0	0	0	1.35575e-06	1.35575e-06	0	0	0	0	0	0	0	0	0	0	0	0	0	0
266	1	266	0	0	0	1	0	0	0	0	0	0	5300000	5320000	0	0	0	5.21118e-06	0	0	0	0	0	0	0	0	0	0	0	0	0	0	0	1.35575e-06	1.35575e-06	0	0	0	0	0	0	0	0	0	0	0	0	0	0
267	1	267	0	0	0	0	0	0	0	0	0	0	5320000	5340000	0	0	0	0	0	0	0	0	0	0	0	0	0	0	0	0	0	0	0	0	0	0	0	0	0	0	0	0	0	0	0	0	0	0	0
268	1	268	0	0	0	0	0	0	0	0	0	0	5340000	5360000	0	0	0	0	0	0	0	0	0	0	0	0	0	0	0	0	0	0	0	0	0	0	0	0	0	0	0	0	0	0	0	0	0	0	0
269	1	269	0	0	0	0	0	0	0	0	0	0	5360000	5380000	0	0	0	0	0	0	0	0	0	0	0	0	0	0	0	0	0	0	0	0	0	0	0	0	0	0	0	0	0	0	0	0	0	0	0
270	1	270	0	0	0	4	0	0	0	0	0	0	5380000	5400000	0	0	0	2.08447e-05	0	0	0	0	0	0	0	0	0	0	0	0	0	0	0	5.42299e-06	5.42299e-06	0	0	0	0	0	0	0	0	0	0	0	0	0	0
271	1	271	0	0	0	1	0	3	1	0	0	0	5400000	5420000	0	0	0	5.21118e-06	0	4.19035e-05	1.16649e-05	0	0	0	0	0	0	0	0	0	0	1.55367e-06	6.11658e-07	1.35575e-06	3.52107e-06	0	0	0	0	0	0	0	0	0	0	0	0	0	0
272	1	272	0	0	0	0	0	1	0	0	0	0	5420000	5440000	0	0	0	0	0	1.39678e-05	0	0	0	0	0	0	0	0	0	0	0	5.17889e-07	0	0	5.17889e-07	0	0	0	0	0	0	0	0	0	0	0	0	0	0
273	1	273	0	0	0	2	0	0	0	0	0	0	5440000	5460000	0	0	0	1.04224e-05	0	0	0	0	0	0	0	0	0	0	0	0	0	0	0	2.7115e-06	2.7115e-06	0	0	0	0	0	0	0	0	0	0	0	0	0	0
274	1	274	0	0	0	1	0	0	0	0	0	0	5460000	5480000	0	0	0	5.21118e-06	0	0	0	0	0	0	0	0	0	0	0	0	0	0	0	1.35575e-06	1.35575e-06	0	0	0	0	0	0	0	0	0	0	0	0	0	0
275	1	275	0	0	0	0	0	0	1	0	0	0	5480000	5500000	0	0	0	0	0	0	1.16649e-05	0	0	0	0	0	0	0	0	0	0	0	6.11658e-07	0	6.11658e-07	0	0	0	0	0	0	0	0	0	0	0	0	0	0
276	1	276	0	0	0	0	0	0	0	0	0	0	5500000	5520000	0	0	0	0	0	0	0	0	0	0	0	0	0	0	0	0	0	0	0	0	0	0	0	0	0	0	0	0	0	0	0	0	0	0	0
277	1	277	0	0	0	2	0	1	0	0	0	0	5520000	5540000	0	0	0	1.04224e-05	0	1.39678e-05	0	0	0	0	0	0	0	0	0	0	0	5.17889e-07	0	2.7115e-06	3.22939e-06	0	0	0	0	0	0	0	0	0	0	0	0	0	0
278	1	278	0	0	0	2	1	2	0	0	0	0	5540000	5560000	0	0	0	1.04224e-05	4.48209e-05	2.79357e-05	0	0	0	0	0	0	0	0	5.43748e-06	0	0	1.03578e-06	0	2.7115e-06	9.18475e-06	0	0	0	0	0	0	0	0	0	0	0	0	0	0
279	1	279	0	0	0	3	0	0	0	0	0	0	5560000	5580000	0	0	0	1.56335e-05	0	0	0	0	0	0	0	0	0	0	0	0	0	0	0	4.06725e-06	4.06725e-06	0	0	0	0	0	0	0	0	0	0	0	0	0	0
280	1	280	0	0	0	0	0	1	0	0	0	0	5580000	5600000	0	0	0	0	0	1.39678e-05	0	0	0	0	0	0	0	0	0	0	0	5.17889e-07	0	0	5.17889e-07	0	0	0	0	0	0	0	0	0	0	0	0	0	0
281	1	281	0	0	0	0	1	1	0	0	0	0	5600000	5620000	0	0	0	0	4.48209e-05	1.39678e-05	0	0	0	0	0	0	0	0	5.43748e-06	0	0	5.17889e-07	0	0	5.95537e-06	0	0	0	0	0	0	0	0	0	0	0	0	0	0
282	1	282	0	0	0	0	1	1	0	0	0	0	5620000	5640000	0	0	0	0	4.48209e-05	1.39678e-05	0	0	0	0	0	0	0	0	5.43748e-06	0	0	5.17889e-07	0	0	5.95537e-06	0	0	0	0	0	0	0	0	0	0	0	0	0	0
283	1	283	0	0	0	0	0	0	1	0	0	0	5640000	5660000	0	0	0	0	0	0	1.16649e-05	0	0	0	0	0	0	0	0	0	0	0	6.11658e-07	0	6.11658e-07	0	0	0	0	0	0	0	0	0	0	0	0	0	0
284	1	284	0	0	0	0	0	0	0	0	0	0	5660000	5680000	0	0	0	0	0	0	0	0	0	0	0	0	0	0	0	0	0	0	0	0	0	0	0	0	0	0	0	0	0	0	0	0	0	0	0
285	1	285	0	0	0	1	3	0	0	0	0	0	5680000	5700000	0	0	0	5.21118e-06	0.000134463	0	0	0	0	0	0	0	0	0	1.63124e-05	0	0	0	0	1.35575e-06	1.76682e-05	0	0	0	0	0	0	0	0	0	0	0	0	0	0
286	1	286	0	0	0	3	0	0	1	0	0	0	5700000	5720000	0	0	0	1.56335e-05	0	0	1.16649e-05	0	0	0	0	0	0	0	0	0	0	0	6.11658e-07	4.06725e-06	4.6789e-06	0	0	0	0	0	0	0	0	0	0	0	0	0	0
287	1	287	0	0	0	1	0	0	0	1	0	0	5720000	5740000	0	0	0	5.21118e-06	0	0	0	2.0859e-05	0	0	0	0	0	0	0	3.59838e-06	0	0	0	1.35575e-06	4.95413e-06	0	0	0	0	0	0	0	0	0	0	0	0	0	0
288	1	288	0	0	0	0	1	0	0	0	0	0	5740000	5760000	0	0	0	0	4.48209e-05	0	0	0	0	0	0	0	0	0	5.43748e-06	0	0	0	0	0	5.43748e-06	0	0	0	0	0	0	0	0	0	0	0	0	0	0
289	1	289	0	0	0	0	0	0	2	0	0	0	5760000	5780000	0	0	0	0	0	0	2.33299e-05	0	0	0	0	0	0	0	0	0	0	0	1.22332e-06	0	1.22332e-06	0	0	0	0	0	0	0	0	0	0	0	0	0	0
290	1	290	0	0	0	0	0	0	1	0	2	0	5780000	5800000	0	0	0	0	0	0	1.16649e-05	0	3.65303e-05	0	0	0	0	0	0	0	1.31478e-06	0	6.11658e-07	0	1.92643e-06	0	0	0	0	0	0	0	0	0	0	0	0	0	0
291	1	291	0	0	0	0	0	1	0	0	0	0	5800000	5820000	0	0	0	0	0	1.39678e-05	0	0	0	0	0	0	0	0	0	0	0	5.17889e-07	0	0	5.17889e-07	0	0	0	0	0	0	0	0	0	0	0	0	0	0
292	1	292	0	0	0	1	0	0	2	0	0	0	5820000	5840000	0	0	0	5.21118e-06	0	0	2.33299e-05	0	0	0	0	0	0	0	0	0	0	0	1.22332e-06	1.35575e-06	2.57906e-06	0	0	0	0	0	0	0	0	0	0	0	0	0	0
293	1	293	0	0	0	3	0	0	0	0	2	0	5840000	5860000	0	0	0	1.56335e-05	0	0	0	0	3.65303e-05	0	0	0	0	0	0	0	1.31478e-06	0	0	4.06725e-06	5.38202e-06	0	0	0	0	0	0	0	0	0	0	0	0	0	0
294	1	294	0	0	0	0	0	0	0	0	0	0	5860000	5880000	0	0	0	0	0	0	0	0	0	0	0	0	0	0	0	0	0	0	0	0	0	0	0	0	0	0	0	0	0	0	0	0	0	0	0
295	1	295	0	0	0	1	0	0	0	0	0	0	5880000	5900000	0	0	0	5.21118e-06	0	0	0	0	0	0	0	0	0	0	0	0	0	0	0	1.35575e-06	1.35575e-06	0	0	0	0	0	0	0	0	0	0	0	0	0	0
296	1	296	0	0	0	0	0	0	0	0	0	0	5900000	5920000	0	0	0	0	0	0	0	0	0	0	0	0	0	0	0	0	0	0	0	0	0	0	0	0	0	0	0	0	0	0	0	0	0	0	0
297	1	297	0	0	0	0	0	1	0	0	0	0	5920000	5940000	0	0	0	0	0	1.39678e-05	0	0	0	0	0	0	0	0	0	0	0	5.17889e-07	0	0	5.17889e-07	0	0	0	0	0	0	0	0	0	0	0	0	0	0
298	1	298	0	0	0	0	0	0	0	0	2	0	5940000	5960000	0	0	0	0	0	0	0	0	3.65303e-05	0	0	0	0	0	0	0	1.31478e-06	0	0	0	1.31478e-06	0	0	0	0	0	0	0	0	0	0	0	0	0	0
299	1	299	0	0	0	1	0	4	1	0	1	0	5960000	5980000	0	0	0	5.21118e-06	0	5.58714e-05	1.16649e-05	0	1.82652e-05	0	0	0	0	0	0	0	6.57388e-07	2.07156e-06	6.11658e-07	1.35575e-06	4.69635e-06	0	0	0	0	0	0	0	0	0	0	0	0	0	0
300	1	300	2	0	0	1	1	0	0	0	1	0	5980000	6000000	0.000859845	0	0	5.21118e-06	4.48209e-05	0	0	0	1.82652e-05	0	0.000122454	0	0	0	5.43748e-06	0	6.57388e-07	0	0	1.35575e-06	0.000129905	0	0	0	0	0	0	0	0	0	0	0	0	0	0
301	1	301	0	0	0	1	0	0	1	0	0	0	6000000	6020000	0	0	0	5.21118e-06	0	0	1.16649e-05	0	0	0	0	0	0	0	0	0	0	0	6.11658e-07	1.35575e-06	1.96741e-06	0	0	0	0	0	0	0	0	0	0	0	0	0	0
302	1	302	0	0	0	1	0	2	0	0	0	0	6020000	6040000	0	0	0	5.21118e-06	0	2.79357e-05	0	0	0	0	0	0	0	0	0	0	0	1.03578e-06	0	1.35575e-06	2.39153e-06	0	0	0	0	0	0	0	0	0	0	0	0	0	0
303	1	303	0	0	0	1	1	1	0	0	0	0	6040000	6060000	0	0	0	5.21118e-06	4.48209e-05	1.39678e-05	0	0	0	0	0	0	0	0	5.43748e-06	0	0	5.17889e-07	0	1.35575e-06	7.31111e-06	0	0	0	0	0	0	0	0	0	0	0	0	0	0
304	1	304	0	0	0	1	1	1	0	0	0	0	6060000	6080000	0	0	0	5.21118e-06	4.48209e-05	1.39678e-05	0	0	0	0	0	0	0	0	5.43748e-06	0	0	5.17889e-07	0	1.35575e-06	7.31111e-06	0	0	0	0	0	0	0	0	0	0	0	0	0	0
305	1	305	0	0	0	4	0	0	0	0	0	0	6080000	6100000	0	0	0	2.08447e-05	0	0	0	0	0	0	0	0	0	0	0	0	0	0	0	5.42299e-06	5.42299e-06	0	0	0	0	0	0	0	0	0	0	0	0	0	0
306	1	306	0	0	0	1	0	0	1	0	1	0	6100000	6120000	0	0	0	5.21118e-06	0	0	1.16649e-05	0	1.82652e-05	0	0	0	0	0	0	0	6.57388e-07	0	6.11658e-07	1.35575e-06	2.62479e-06	0	0	0	0	0	0	0	0	0	0	0	0	0	0
307	1	307	0	0	0	4	0	1	0	0	1	0	6120000	6140000	0	0	0	2.08447e-05	0	1.39678e-05	0	0	1.82652e-05	0	0	0	0	0	0	0	6.57388e-07	5.17889e-07	0	5.42299e-06	6.59827e-06	0	0	0	0	0	0	0	0	0	0	0	0	0	0
308	1	308	0	0	0	1	0	0	0	0	0	0	6140000	6160000	0	0	0	5.21118e-06	0	0	0	0	0	0	0	0	0	0	0	0	0	0	0	1.35575e-06	1.35575e-06	0	0	0	0	0	0	0	0	0	0	0	0	0	0
309	1	309	0	0	0	2	0	5	1	0	0	0	6160000	6180000	0	0	0	1.04224e-05	0	6.98392e-05	1.16649e-05	0	0	0	0	0	0	0	0	0	0	2.58945e-06	6.11658e-07	2.7115e-06	5.9126e-06	0	0	0	0	0	0	0	0	0	0	0	0	0	0
310	1	310	0	0	0	1	0	0	1	0	1	0	6180000	6200000	0	0	0	5.21118e-06	0	0	1.16649e-05	0	1.82652e-05	0	0	0	0	0	0	0	6.57388e-07	0	6.11658e-07	1.35575e-06	2.62479e-06	0	0	0	0	0	0	0	0	0	0	0	0	0	0
311	1	311	0	0	0	0	0	2	0	0	0	0	6200000	6220000	0	0	0	0	0	2.79357e-05	0	0	0	0	0	0	0	0	0	0	0	1.03578e-06	0	0	1.03578e-06	0	0	0	0	0	0	0	0	0	0	0	0	0	0
312	1	312	0	0	0	0	0	1	2	0	1	0	6220000	6240000	0	0	0	0	0	1.39678e-05	2.33299e-05	0	1.82652e-05	0	0	0	0	0	0	0	6.57388e-07	5.17889e-07	1.22332e-06	0	2.39859e-06	0	0	0	0	0	0	0	0	0	0	0	0	0	0
313	1	313	0	0	0	2	3	0	0	0	0	1	6240000	6260000	0	0	0	1.04224e-05	0.000134463	0	0	0	0	0.000147449	0	0	0	1.93976e-05	1.63124e-05	0	0	0	0	2.7115e-06	3.84215e-05	0	0	0	0	0	0	0	0	0	0	0	0	0	0
314	1	314	0	0	0	1	2	0	1	0	3	0	6260000	6280000	0	0	0	5.21118e-06	8.96419e-05	0	1.16649e-05	0	5.47955e-05	0	0	0	0	0	1.0875e-05	0	1.97216e-06	0	6.11658e-07	1.35575e-06	1.48145e-05	0	0	0	0	0	0	0	0	0	0	0	0	0	0
315	1	315	0	0	0	0	1	0	0	0	1	0	6280000	6300000	0	0	0	0	4.48209e-05	0	0	0	1.82652e-05	0	0	0	0	0	5.43748e-06	0	6.57388e-07	0	0	0	6.09486e-06	0	0	0	0	0	0	0	0	0	0	0	0	0	0
316	1	316	0	0	0	0	1	1	0	0	3	0	6300000	6320000	0	0	0	0	4.48209e-05	1.39678e-05	0	0	5.47955e-05	0	0	0	0	0	5.43748e-06	0	1.97216e-06	5.17889e-07	0	0	7.92753e-06	0	0	0	0	0	0	0	0	0	0	0	0	0	0
317	1	317	0	0	0	0	0	0	1	0	0	0	6320000	6340000	0	0	0	0	0	0	1.16649e-05	0	0	0	0	0	0	0	0	0	0	0	6.11658e-07	0	6.11658e-07	0	0	0	0	0	0	0	0	0	0	0	0	0	0
318	1	318	0	0	0	0	0	0	0	0	1	0	6340000	6360000	0	0	0	0	0	0	0	0	1.82652e-05	0	0	0	0	0	0	0	6.57388e-07	0	0	0	6.57388e-07	0	0	0	0	0	0	0	0	0	0	0	0	0	0
319	1	319	0	0	0	2	1	5	0	0	2	0	6360000	6380000	0	0	0	1.04224e-05	4.48209e-05	6.98392e-05	0	0	3.65303e-05	0	0	0	0	0	5.43748e-06	0	1.31478e-06	2.58945e-06	0	2.7115e-06	1.20532e-05	0	0	0	0	0	0	0	0	0	0	0	0	0	0
320	1	320	0	0	0	1	0	0	0	0	0	0	6380000	6400000	0	0	0	5.21118e-06	0	0	0	0	0	0	0	0	0	0	0	0	0	0	0	1.35575e-06	1.35575e-06	0	0	0	0	0	0	0	0	0	0	0	0	0	0
321	1	321	0	1	0	0	0	0	2	0	2	0	6400000	6420000	0	0.000392773	0	0	0	0	2.33299e-05	0	3.65303e-05	0	0	0	2.68104e-06	0	0	0	1.31478e-06	0	1.22332e-06	0	5.21914e-06	0	0	0	0	0	0	0	0	0	0	0	0	0	0
322	1	322	0	1	0	0	0	0	0	0	1	0	6420000	6440000	0	0.000392773	0	0	0	0	0	0	1.82652e-05	0	0	0	2.68104e-06	0	0	0	6.57388e-07	0	0	0	3.33843e-06	0	0	0	0	0	0	0	0	0	0	0	0	0	0
323	1	323	0	0	0	0	0	1	0	0	1	0	6440000	6460000	0	0	0	0	0	1.39678e-05	0	0	1.82652e-05	0	0	0	0	0	0	0	6.57388e-07	5.17889e-07	0	0	1.17528e-06	0	0	0	0	0	0	0	0	0	0	0	0	0	0
324	1	324	0	0	0	1	3	2	3	0	1	0	6460000	6480000	0	0	0	5.21118e-06	0.000134463	2.79357e-05	3.49948e-05	0	1.82652e-05	0	0	0	0	0	1.63124e-05	0	6.57388e-07	1.03578e-06	1.83497e-06	1.35575e-06	2.11963e-05	0	0	0	0	0	0	0	0	0	0	0	0	0	0
325	1	325	0	0	0	0	0	1	1	0	0	0	6480000	6500000	0	0	0	0	0	1.39678e-05	1.16649e-05	0	0	0	0	0	0	0	0	0	0	5.17889e-07	6.11658e-07	0	1.12955e-06	0	0	0	0	0	0	0	0	0	0	0	0	0	0
326	1	326	0	0	0	1	0	0	0	0	1	0	6500000	6520000	0	0	0	5.21118e-06	0	0	0	0	1.82652e-05	0	0	0	0	0	0	0	6.57388e-07	0	0	1.35575e-06	2.01314e-06	0	0	0	0	0	0	0	0	0	0	0	0	0	0
327	1	327	0	0	0	0	0	0	0	0	0	0	6520000	6540000	0	0	0	0	0	0	0	0	0	0	0	0	0	0	0	0	0	0	0	0	0	0	0	0	0	0	0	0	0	0	0	0	0	0	0
328	1	328	0	0	0	1	1	0	0	0	0	0	6540000	6560000	0	0	0	5.21118e-06	4.48209e-05	0	0	0	0	0	0	0	0	0	5.43748e-06	0	0	0	0	1.35575e-06	6.79323e-06	0	0	0	0	0	0	0	0	0	0	0	0	0	0
329	1	329	0	0	0	2	0	0	0	0	0	0	6560000	6580000	0	0	0	1.04224e-05	0	0	0	0	0	0	0	0	0	0	0	0	0	0	0	2.7115e-06	2.7115e-06	0	0	0	0	0	0	0	0	0	0	0	0	0	0
330	1	330	0	0	0	2	1	1	1	0	0	0	6580000	6600000	0	0	0	1.04224e-05	4.48209e-05	1.39678e-05	1.16649e-05	0	0	0	0	0	0	0	5.43748e-06	0	0	5.17889e-07	6.11658e-07	2.7115e-06	9.27852e-06	0	0	0	0	0	0	0	0	0	0	0	0	0	0
331	1	331	0	0	0	2	1	2	0	1	0	0	6600000	6620000	0	0	0	1.04224e-05	4.48209e-05	2.79357e-05	0	2.0859e-05	0	0	0	0	0	0	5.43748e-06	3.59838e-06	0	1.03578e-06	0	2.7115e-06	1.27831e-05	0	0	0	0	0	0	0	0	0	0	0	0	0	0
332	1	332	0	0	0	0	0	0	3	0	0	0	6620000	6640000	0	0	0	0	0	0	3.49948e-05	0	0	0	0	0	0	0	0	0	0	0	1.83497e-06	0	1.83497e-06	0	0	0	0	0	0	0	0	0	0	0	0	0	0
333	1	333	0	0	0	0	0	1	1	0	0	1	6640000	6660000	0	0	0	0	0	1.39678e-05	1.16649e-05	0	0	0.000147449	0	0	0	1.93976e-05	0	0	0	5.17889e-07	6.11658e-07	0	2.05271e-05	0	0	0	0	0	0	0	0	0	0	0	0	0	0
334	1	334	2	0	0	0	0	1	0	0	0	0	6660000	6680000	0.000859845	0	0	0	0	1.39678e-05	0	0	0	0	0.000122454	0	0	0	0	0	0	5.17889e-07	0	0	0.000122972	0	0	0	0	0	0	0	0	0	0	0	0	0	0
335	1	335	0	0	0	0	0	0	1	0	0	0	6680000	6700000	0	0	0	0	0	0	1.16649e-05	0	0	0	0	0	0	0	0	0	0	0	6.11658e-07	0	6.11658e-07	0	0	0	0	0	0	0	0	0	0	0	0	0	0
336	1	336	0	0	0	0	0	1	5	0	0	0	6700000	6720000	0	0	0	0	0	1.39678e-05	5.83247e-05	0	0	0	0	0	0	0	0	0	0	5.17889e-07	3.05829e-06	0	3.57618e-06	0	0	0	0	0	0	0	0	0	0	0	0	0	0
337	1	337	0	0	0	1	3	0	0	0	0	0	6720000	6740000	0	0	0	5.21118e-06	0.000134463	0	0	0	0	0	0	0	0	0	1.63124e-05	0	0	0	0	1.35575e-06	1.76682e-05	0	0	0	0	0	0	0	0	0	0	0	0	0	0
338	1	338	0	0	0	0	1	2	0	0	0	0	6740000	6760000	0	0	0	0	4.48209e-05	2.79357e-05	0	0	0	0	0	0	0	0	5.43748e-06	0	0	1.03578e-06	0	0	6.47326e-06	0	0	0	0	0	0	0	0	0	0	0	0	0	0
339	1	339	0	0	0	1	0	0	2	0	0	0	6760000	6780000	0	0	0	5.21118e-06	0	0	2.33299e-05	0	0	0	0	0	0	0	0	0	0	0	1.22332e-06	1.35575e-06	2.57906e-06	0	0	0	0	0	0	0	0	0	0	0	0	0	0
340	1	340	0	0	0	0	0	0	0	0	0	0	6780000	6800000	0	0	0	0	0	0	0	0	0	0	0	0	0	0	0	0	0	0	0	0	0	0	0	0	0	0	0	0	0	0	0	0	0	0	0
341	1	341	0	0	0	1	1	0	0	0	0	0	6800000	6820000	0	0	0	5.21118e-06	4.48209e-05	0	0	0	0	0	0	0	0	0	5.43748e-06	0	0	0	0	1.35575e-06	6.79323e-06	0	0	0	0	0	0	0	0	0	0	0	0	0	0
342	1	342	0	0	0	0	1	1	0	0	0	0	6820000	6840000	0	0	0	0	4.48209e-05	1.39678e-05	0	0	0	0	0	0	0	0	5.43748e-06	0	0	5.17889e-07	0	0	5.95537e-06	0	0	0	0	0	0	0	0	0	0	0	0	0	0
343	1	343	0	0	0	3	2	0	0	0	0	0	6840000	6860000	0	0	0	1.56335e-05	8.96419e-05	0	0	0	0	0	0	0	0	0	1.0875e-05	0	0	0	0	4.06725e-06	1.49422e-05	0	0	0	0	0	0	0	0	0	0	0	0	0	0
344	1	344	0	0	0	1	0	2	0	0	2	0	6860000	6880000	0	0	0	5.21118e-06	0	2.79357e-05	0	0	3.65303e-05	0	0	0	0	0	0	0	1.31478e-06	1.03578e-06	0	1.35575e-06	3.7063e-06	0	0	0	0	0	0	0	0	0	0	0	0	0	0
345	1	345	0	0	0	1	1	0	0	0	0	0	6880000	6900000	0	0	0	5.21118e-06	4.48209e-05	0	0	0	0	0	0	0	0	0	5.43748e-06	0	0	0	0	1.35575e-06	6.79323e-06	0	0	0	0	0	0	0	0	0	0	0	0	0	0
346	1	346	0	0	0	1	0	1	3	0	0	0	6900000	6920000	0	0	0	5.21118e-06	0	1.39678e-05	3.49948e-05	0	0	0	0	0	0	0	0	0	0	5.17889e-07	1.83497e-06	1.35575e-06	3.70861e-06	0	0	0	0	0	0	0	0	0	0	0	0	0	0
347	1	347	0	0	0	0	0	1	3	0	0	0	6920000	6940000	0	0	0	0	0	1.39678e-05	3.49948e-05	0	0	0	0	0	0	0	0	0	0	5.17889e-07	1.83497e-06	0	2.35286e-06	0	0	0	0	0	0	0	0	0	0	0	0	0	0
348	1	348	0	0	0	0	0	1	0	0	0	0	6940000	6960000	0	0	0	0	0	1.39678e-05	0	0	0	0	0	0	0	0	0	0	0	5.17889e-07	0	0	5.17889e-07	0	0	0	0	0	0	0	0	0	0	0	0	0	0
349	1	349	0	0	0	1	1	0	2	0	0	0	6960000	6980000	0	0	0	5.21118e-06	4.48209e-05	0	2.33299e-05	0	0	0	0	0	0	0	5.43748e-06	0	0	0	1.22332e-06	1.35575e-06	8.01654e-06	0	0	0	0	0	0	0	0	0	0	0	0	0	0
350	1	350	0	0	0	4	0	0	0	0	1	0	6980000	7000000	0	0	0	2.08447e-05	0	0	0	0	1.82652e-05	0	0	0	0	0	0	0	6.57388e-07	0	0	5.42299e-06	6.08038e-06	0	0	0	0	0	0	0	0	0	0	0	0	0	0
351	1	351	0	0	0	0	1	1	0	0	0	0	7000000	7020000	0	0	0	0	4.48209e-05	1.39678e-05	0	0	0	0	0	0	0	0	5.43748e-06	0	0	5.17889e-07	0	0	5.95537e-06	0	0	0	0	0	0	0	0	0	0	0	0	0	0
352	1	352	0	0	0	0	0	0	0	0	0	0	7020000	7040000	0	0	0	0	0	0	0	0	0	0	0	0	0	0	0	0	0	0	0	0	0	0	0	0	0	0	0	0	0	0	0	0	0	0	0
353	1	353	0	0	0	0	0	0	0	0	0	0	7040000	7060000	0	0	0	0	0	0	0	0	0	0	0	0	0	0	0	0	0	0	0	0	0	0	0	0	0	0	0	0	0	0	0	0	0	0	0
354	1	354	0	0	0	2	0	0	3	0	0	0	7060000	7080000	0	0	0	1.04224e-05	0	0	3.49948e-05	0	0	0	0	0	0	0	0	0	0	0	1.83497e-06	2.7115e-06	4.54647e-06	0	0	0	0	0	0	0	0	0	0	0	0	0	0
355	1	355	0	0	0	0	0	2	0	0	0	0	7080000	7100000	0	0	0	0	0	2.79357e-05	0	0	0	0	0	0	0	0	0	0	0	1.03578e-06	0	0	1.03578e-06	0	0	0	0	0	0	0	0	0	0	0	0	0	0
356	1	356	0	0	0	0	0	0	0	0	0	0	7100000	7120000	0	0	0	0	0	0	0	0	0	0	0	0	0	0	0	0	0	0	0	0	0	0	0	0	0	0	0	0	0	0	0	0	0	0	0
357	1	357	0	0	0	1	0	0	0	0	2	0	7120000	7140000	0	0	0	5.21118e-06	0	0	0	0	3.65303e-05	0	0	0	0	0	0	0	1.31478e-06	0	0	1.35575e-06	2.67052e-06	0	0	0	0	0	0	0	0	0	0	0	0	0	0
358	1	358	0	0	0	0	0	0	0	0	0	0	7140000	7160000	0	0	0	0	0	0	0	0	0	0	0	0	0	0	0	0	0	0	0	0	0	0	0	0	0	0	0	0	0	0	0	0	0	0	0
359	1	359	0	0	0	0	0	0	0	0	0	0	7160000	7180000	0	0	0	0	0	0	0	0	0	0	0	0	0	0	0	0	0	0	0	0	0	0	0	0	0	0	0	0	0	0	0	0	0	0	0
360	1	360	0	0	0	0	0	0	0	0	0	0	7180000	7200000	0	0	0	0	0	0	0	0	0	0	0	0	0	0	0	0	0	0	0	0	0	0	0	0	0	0	0	0	0	0	0	0	0	0	0
361	1	361	0	0	0	0	0	0	0	0	0	0	7200000	7220000	0	0	0	0	0	0	0	0	0	0	0	0	0	0	0	0	0	0	0	0	0	0	0	0	0	0	0	0	0	0	0	0	0	0	0
362	1	362	0	0	0	1	0	1	0	0	1	0	7220000	7240000	0	0	0	5.21118e-06	0	1.39678e-05	0	0	1.82652e-05	0	0	0	0	0	0	0	6.57388e-07	5.17889e-07	0	1.35575e-06	2.53103e-06	0	0	0	0	0	0	0	0	0	0	0	0	0	0
363	1	363	0	0	0	0	0	0	0	0	0	0	7240000	7260000	0	0	0	0	0	0	0	0	0	0	0	0	0	0	0	0	0	0	0	0	0	0	0	0	0	0	0	0	0	0	0	0	0	0	0
364	1	364	0	0	0	0	0	0	4	0	0	0	7260000	7280000	0	0	0	0	0	0	4.66597e-05	0	0	0	0	0	0	0	0	0	0	0	2.44663e-06	0	2.44663e-06	0	0	0	0	0	0	0	0	0	0	0	0	0	0
365	1	365	0	0	0	0	0	0	1	0	1	0	7280000	7300000	0	0	0	0	0	0	1.16649e-05	0	1.82652e-05	0	0	0	0	0	0	0	6.57388e-07	0	6.11658e-07	0	1.26905e-06	0	0	0	0	0	0	0	0	0	0	0	0	0	0
366	1	366	0	0	0	0	0	0	0	0	1	0	7300000	7320000	0	0	0	0	0	0	0	0	1.82652e-05	0	0	0	0	0	0	0	6.57388e-07	0	0	0	6.57388e-07	0	0	0	0	0	0	0	0	0	0	0	0	0	0
367	1	367	0	0	0	0	0	0	0	0	1	0	7320000	7340000	0	0	0	0	0	0	0	0	1.82652e-05	0	0	0	0	0	0	0	6.57388e-07	0	0	0	6.57388e-07	0	0	0	0	0	0	0	0	0	0	0	0	0	0
368	1	368	0	0	0	0	0	0	0	0	2	0	7340000	7360000	0	0	0	0	0	0	0	0	3.65303e-05	0	0	0	0	0	0	0	1.31478e-06	0	0	0	1.31478e-06	0	0	0	0	0	0	0	0	0	0	0	0	0	0
369	1	369	0	0	0	0	0	0	0	0	0	0	7360000	7380000	0	0	0	0	0	0	0	0	0	0	0	0	0	0	0	0	0	0	0	0	0	0	0	0	0	0	0	0	0	0	0	0	0	0	0
370	1	370	0	0	0	0	0	0	1	0	0	0	7380000	7400000	0	0	0	0	0	0	1.16649e-05	0	0	0	0	0	0	0	0	0	0	0	6.11658e-07	0	6.11658e-07	0	0	0	0	0	0	0	0	0	0	0	0	0	0
371	1	371	0	0	0	2	0	1	0	0	1	0	7400000	7420000	0	0	0	1.04224e-05	0	1.39678e-05	0	0	1.82652e-05	0	0	0	0	0	0	0	6.57388e-07	5.17889e-07	0	2.7115e-06	3.88677e-06	0	0	0	0	0	0	0	0	0	0	0	0	0	0
372	1	372	0	0	0	0	0	0	0	0	0	0	7420000	7440000	0	0	0	0	0	0	0	0	0	0	0	0	0	0	0	0	0	0	0	0	0	0	0	0	0	0	0	0	0	0	0	0	0	0	0
373	1	373	0	0	0	0	0	0	1	0	0	0	7440000	7460000	0	0	0	0	0	0	1.16649e-05	0	0	0	0	0	0	0	0	0	0	0	6.11658e-07	0	6.11658e-07	0	0	0	0	0	0	0	0	0	0	0	0	0	0
374	1	374	0	0	0	0	0	0	0	0	0	0	7460000	7480000	0	0	0	0	0	0	0	0	0	0	0	0	0	0	0	0	0	0	0	0	0	0	0	0	0	0	0	0	0	0	0	0	0	0	0
375	1	375	0	0	0	3	0	0	0	0	0	0	7480000	7500000	0	0	0	1.56335e-05	0	0	0	0	0	0	0	0	0	0	0	0	0	0	0	4.06725e-06	4.06725e-06	0	0	0	0	0	0	0	0	0	0	0	0	0	0
376	1	376	0	0	0	0	0	1	1	0	0	0	7500000	7520000	0	0	0	0	0	1.39678e-05	1.16649e-05	0	0	0	0	0	0	0	0	0	0	5.17889e-07	6.11658e-07	0	1.12955e-06	0	0	0	0	0	0	0	0	0	0	0	0	0	0
377	1	377	0	0	0	0	0	0	0	0	0	0	7520000	7540000	0	0	0	0	0	0	0	0	0	0	0	0	0	0	0	0	0	0	0	0	0	0	0	0	0	0	0	0	0	0	0	0	0	0	0
378	1	378	0	0	0	0	0	2	1	0	0	0	7540000	7560000	0	0	0	0	0	2.79357e-05	1.16649e-05	0	0	0	0	0	0	0	0	0	0	1.03578e-06	6.11658e-07	0	1.64744e-06	0	0	0	0	0	0	0	0	0	0	0	0	0	0
379	1	379	0	0	0	0	0	1	0	0	0	0	7560000	7580000	0	0	0	0	0	1.39678e-05	0	0	0	0	0	0	0	0	0	0	0	5.17889e-07	0	0	5.17889e-07	0	0	0	0	0	0	0	0	0	0	0	0	0	0
380	1	380	0	0	0	0	0	2	0	0	0	0	7580000	7600000	0	0	0	0	0	2.79357e-05	0	0	0	0	0	0	0	0	0	0	0	1.03578e-06	0	0	1.03578e-06	0	0	0	0	0	0	0	0	0	0	0	0	0	0
381	1	381	0	0	0	0	0	0	0	0	0	0	7600000	7620000	0	0	0	0	0	0	0	0	0	0	0	0	0	0	0	0	0	0	0	0	0	0	0	0	0	0	0	0	0	0	0	0	0	0	0
382	1	382	0	0	0	0	0	1	3	0	0	0	7620000	7640000	0	0	0	0	0	1.39678e-05	3.49948e-05	0	0	0	0	0	0	0	0	0	0	5.17889e-07	1.83497e-06	0	2.35286e-06	0	0	0	0	0	0	0	0	0	0	0	0	0	0
383	1	383	0	1	0	0	0	0	0	0	0	0	7640000	7660000	0	0.000392773	0	0	0	0	0	0	0	0	0	0	2.68104e-06	0	0	0	0	0	0	0	2.68104e-06	0	0	0	0	0	0	0	0	0	0	0	0	0	0
384	1	384	0	0	0	0	0	0	1	0	0	0	7660000	7680000	0	0	0	0	0	0	1.16649e-05	0	0	0	0	0	0	0	0	0	0	0	6.11658e-07	0	6.11658e-07	0	0	0	0	0	0	0	0	0	0	0	0	0	0
385	1	385	0	0	0	0	0	0	0	0	0	0	7680000	7700000	0	0	0	0	0	0	0	0	0	0	0	0	0	0	0	0	0	0	0	0	0	0	0	0	0	0	0	0	0	0	0	0	0	0	0
386	1	386	0	0	0	0	0	0	6	0	0	0	7700000	7720000	0	0	0	0	0	0	6.99896e-05	0	0	0	0	0	0	0	0	0	0	0	3.66995e-06	0	3.66995e-06	0	0	0	0	0	0	0	0	0	0	0	0	0	0
387	1	387	0	0	0	0	0	0	1	0	0	0	7720000	7740000	0	0	0	0	0	0	1.16649e-05	0	0	0	0	0	0	0	0	0	0	0	6.11658e-07	0	6.11658e-07	0	0	0	0	0	0	0	0	0	0	0	0	0	0
388	1	388	0	0	0	0	0	0	0	1	0	0	7740000	7760000	0	0	0	0	0	0	0	2.0859e-05	0	0	0	0	0	0	0	3.59838e-06	0	0	0	0	3.59838e-06	0	0	0	0	0	0	0	0	0	0	0	0	0	0
389	1	389	0	0	0	2	0	0	0	0	1	0	7760000	7780000	0	0	0	1.04224e-05	0	0	0	0	1.82652e-05	0	0	0	0	0	0	0	6.57388e-07	0	0	2.7115e-06	3.36888e-06	0	0	0	0	0	0	0	0	0	0	0	0	0	0
390	1	390	0	0	0	0	0	0	0	0	0	0	7780000	7800000	0	0	0	0	0	0	0	0	0	0	0	0	0	0	0	0	0	0	0	0	0	0	0	0	0	0	0	0	0	0	0	0	0	0	0
391	1	391	0	0	0	2	0	1	0	0	0	0	7800000	7820000	0	0	0	1.04224e-05	0	1.39678e-05	0	0	0	0	0	0	0	0	0	0	0	5.17889e-07	0	2.7115e-06	3.22939e-06	0	0	0	0	0	0	0	0	0	0	0	0	0	0
392	1	392	0	0	0	2	0	0	1	1	0	0	7820000	7840000	0	0	0	1.04224e-05	0	0	1.16649e-05	2.0859e-05	0	0	0	0	0	0	0	3.59838e-06	0	0	6.11658e-07	2.7115e-06	6.92154e-06	0	0	0	0	0	0	0	0	0	0	0	0	0	0
393	1	393	0	0	0	1	1	1	0	0	0	0	7840000	7860000	0	0	0	5.21118e-06	4.48209e-05	1.39678e-05	0	0	0	0	0	0	0	0	5.43748e-06	0	0	5.17889e-07	0	1.35575e-06	7.31111e-06	0	0	0	0	0	0	0	0	0	0	0	0	0	0
394	1	394	0	0	0	0	0	0	0	0	0	0	7860000	7880000	0	0	0	0	0	0	0	0	0	0	0	0	0	0	0	0	0	0	0	0	0	0	0	0	0	0	0	0	0	0	0	0	0	0	0
395	1	395	0	0	0	1	0	0	0	0	0	0	7880000	7900000	0	0	0	5.21118e-06	0	0	0	0	0	0	0	0	0	0	0	0	0	0	0	1.35575e-06	1.35575e-06	0	0	0	0	0	0	0	0	0	0	0	0	0	0
396	1	396	0	0	0	0	1	1	0	0	0	0	7900000	7920000	0	0	0	0	4.48209e-05	1.39678e-05	0	0	0	0	0	0	0	0	5.43748e-06	0	0	5.17889e-07	0	0	5.95537e-06	0	0	0	0	0	0	0	0	0	0	0	0	0	0
397	1	397	0	0	0	0	0	0	0	0	0	0	7920000	7940000	0	0	0	0	0	0	0	0	0	0	0	0	0	0	0	0	0	0	0	0	0	0	0	0	0	0	0	0	0	0	0	0	0	0	0
398	1	398	0	0	0	3	0	2	0	0	3	0	7940000	7960000	0	0	0	1.56335e-05	0	2.79357e-05	0	0	5.47955e-05	0	0	0	0	0	0	0	1.97216e-06	1.03578e-06	0	4.06725e-06	7.07519e-06	0	0	0	0	0	0	0	0	0	0	0	0	0	0
399	1	399	2	0	0	0	2	0	2	0	0	0	7960000	7980000	0.000859845	0	0	0	8.96419e-05	0	2.33299e-05	0	0	0	0.000122454	0	0	0	1.0875e-05	0	0	0	1.22332e-06	0	0.000134552	0	0	0	0	0	0	0	0	0	0	0	0	0	0
400	1	400	0	0	0	0	0	0	1	0	1	0	7980000	8000000	0	0	0	0	0	0	1.16649e-05	0	1.82652e-05	0	0	0	0	0	0	0	6.57388e-07	0	6.11658e-07	0	1.26905e-06	0	0	0	0	0	0	0	0	0	0	0	0	0	0
401	1	401	0	0	0	1	0	1	0	0	1	0	8000000	8020000	0	0	0	5.21118e-06	0	1.39678e-05	0	0	1.82652e-05	0	0	0	0	0	0	0	6.57388e-07	5.17889e-07	0	1.35575e-06	2.53103e-06	0	0	0	0	0	0	0	0	0	0	0	0	0	0
402	1	402	0	0	0	0	0	0	0	0	0	0	8020000	8040000	0	0	0	0	0	0	0	0	0	0	0	0	0	0	0	0	0	0	0	0	0	0	0	0	0	0	0	0	0	0	0	0	0	0	0
403	1	403	0	0	0	1	0	0	0	0	1	0	8040000	8060000	0	0	0	5.21118e-06	0	0	0	0	1.82652e-05	0	0	0	0	0	0	0	6.57388e-07	0	0	1.35575e-06	2.01314e-06	0	0	0	0	0	0	0	0	0	0	0	0	0	0
404	1	404	0	0	0	5	1	0	1	0	0	0	8060000	8080000	0	0	0	2.60559e-05	4.48209e-05	0	1.16649e-05	0	0	0	0	0	0	0	5.43748e-06	0	0	0	6.11658e-07	6.77874e-06	1.28279e-05	0	0	0	0	0	0	0	0	0	0	0	0	0	0
405	1	405	0	0	0	0	0	0	0	1	0	0	8080000	8100000	0	0	0	0	0	0	0	2.0859e-05	0	0	0	0	0	0	0	3.59838e-06	0	0	0	0	3.59838e-06	0	0	0	0	0	0	0	0	0	0	0	0	0	0
406	1	406	0	0	0	1	0	0	1	0	0	0	8100000	8120000	0	0	0	5.21118e-06	0	0	1.16649e-05	0	0	0	0	0	0	0	0	0	0	0	6.11658e-07	1.35575e-06	1.96741e-06	0	0	0	0	0	0	0	0	0	0	0	0	0	0
407	1	407	0	0	0	0	0	0	0	0	0	0	8120000	8140000	0	0	0	0	0	0	0	0	0	0	0	0	0	0	0	0	0	0	0	0	0	0	0	0	0	0	0	0	0	0	0	0	0	0	0
408	1	408	0	0	0	1	0	1	0	2	0	0	8140000	8160000	0	0	0	5.21118e-06	0	1.39678e-05	0	4.17179e-05	0	0	0	0	0	0	0	7.19677e-06	0	5.17889e-07	0	1.35575e-06	9.0704e-06	0	0	0	0	0	0	0	0	0	0	0	0	0	0
409	1	409	0	0	0	0	0	0	0	2	0	0	8160000	8180000	0	0	0	0	0	0	0	4.17179e-05	0	0	0	0	0	0	0	7.19677e-06	0	0	0	0	7.19677e-06	0	0	0	0	0	0	0	0	0	0	0	0	0	0
410	1	410	0	0	0	4	0	0	1	0	2	0	8180000	8200000	0	0	0	2.08447e-05	0	0	1.16649e-05	0	3.65303e-05	0	0	0	0	0	0	0	1.31478e-06	0	6.11658e-07	5.42299e-06	7.34943e-06	0	0	0	0	0	0	0	0	0	0	0	0	0	0
411	1	411	0	0	0	4	0	0	1	0	0	0	8200000	8220000	0	0	0	2.08447e-05	0	0	1.16649e-05	0	0	0	0	0	0	0	0	0	0	0	6.11658e-07	5.42299e-06	6.03465e-06	0	0	0	0	0	0	0	0	0	0	0	0	0	0
412	1	412	0	0	0	0	1	2	1	0	1	0	8220000	8240000	0	0	0	0	4.48209e-05	2.79357e-05	1.16649e-05	0	1.82652e-05	0	0	0	0	0	5.43748e-06	0	6.57388e-07	1.03578e-06	6.11658e-07	0	7.7423e-06	0	0	0	0	0	0	0	0	0	0	0	0	0	0
413	1	413	0	0	0	0	0	0	0	0	0	0	8240000	8260000	0	0	0	0	0	0	0	0	0	0	0	0	0	0	0	0	0	0	0	0	0	0	0	0	0	0	0	0	0	0	0	0	0	0	0
414	1	414	0	0	0	2	0	2	0	0	0	0	8260000	8280000	0	0	0	1.04224e-05	0	2.79357e-05	0	0	0	0	0	0	0	0	0	0	0	1.03578e-06	0	2.7115e-06	3.74728e-06	0	0	0	0	0	0	0	0	0	0	0	0	0	0
415	1	415	0	0	0	2	0	0	0	0	0	0	8280000	8300000	0	0	0	1.04224e-05	0	0	0	0	0	0	0	0	0	0	0	0	0	0	0	2.7115e-06	2.7115e-06	0	0	0	0	0	0	0	0	0	0	0	0	0	0
416	1	416	0	0	0	3	2	0	1	0	0	0	8300000	8320000	0	0	0	1.56335e-05	8.96419e-05	0	1.16649e-05	0	0	0	0	0	0	0	1.0875e-05	0	0	0	6.11658e-07	4.06725e-06	1.55539e-05	0	0	0	0	0	0	0	0	0	0	0	0	0	0
417	1	417	0	0	0	1	0	0	1	0	0	0	8320000	8340000	0	0	0	5.21118e-06	0	0	1.16649e-05	0	0	0	0	0	0	0	0	0	0	0	6.11658e-07	1.35575e-06	1.96741e-06	0	0	0	0	0	0	0	0	0	0	0	0	0	0
418	1	418	0	0	0	0	0	0	0	0	0	0	8340000	8360000	0	0	0	0	0	0	0	0	0	0	0	0	0	0	0	0	0	0	0	0	0	0	0	0	0	0	0	0	0	0	0	0	0	0	0
419	1	419	0	0	0	0	0	1	0	0	0	0	8360000	8380000	0	0	0	0	0	1.39678e-05	0	0	0	0	0	0	0	0	0	0	0	5.17889e-07	0	0	5.17889e-07	0	0	0	0	0	0	0	0	0	0	0	0	0	0
420	1	420	0	0	0	3	0	0	0	1	0	0	8380000	8400000	0	0	0	1.56335e-05	0	0	0	2.0859e-05	0	0	0	0	0	0	0	3.59838e-06	0	0	0	4.06725e-06	7.66563e-06	0	0	0	0	0	0	0	0	0	0	0	0	0	0
421	1	421	0	0	0	2	0	1	2	2	0	0	8400000	8420000	0	0	0	1.04224e-05	0	1.39678e-05	2.33299e-05	4.17179e-05	0	0	0	0	0	0	0	7.19677e-06	0	5.17889e-07	1.22332e-06	2.7115e-06	1.16495e-05	0	0	0	0	0	0	0	0	0	0	0	0	0	0
422	1	422	0	0	0	2	2	0	0	0	0	0	8420000	8440000	0	0	0	1.04224e-05	8.96419e-05	0	0	0	0	0	0	0	0	0	1.0875e-05	0	0	0	0	2.7115e-06	1.35865e-05	0	0	0	0	0	0	0	0	0	0	0	0	0	0
423	1	423	0	0	0	4	0	8	1	0	1	2	8440000	8460000	0	0	0	2.08447e-05	0	0.000111743	1.16649e-05	0	1.82652e-05	0.000294898	0	0	0	3.87952e-05	0	0	6.57388e-07	4.14312e-06	6.11658e-07	5.42299e-06	4.96303e-05	0	0	0	0	0	0	0	0	0	0	0	0	0	0
424	1	424	0	0	0	2	0	0	1	0	0	2	8460000	8480000	0	0	0	1.04224e-05	0	0	1.16649e-05	0	0	0.000294898	0	0	0	3.87952e-05	0	0	0	0	6.11658e-07	2.7115e-06	4.21183e-05	0	0	0	0	0	0	0	0	0	0	0	0	0	0
425	1	425	0	0	0	2	0	4	0	21	0	0	8480000	8500000	0	0	0	1.04224e-05	0	5.58714e-05	0	0.000438038	0	0	0	0	0	0	0	7.5566e-05	0	2.07156e-06	0	2.7115e-06	8.03491e-05	0	0	0	0	0	0	0	1	0	0	0	0	0	0
426	1	426	1	0	0	1	0	0	0	10	0	0	8500000	8520000	0.000429923	0	0	5.21118e-06	0	0	0	0.00020859	0	0	6.1227e-05	0	0	0	0	3.59838e-05	0	0	0	1.35575e-06	9.85665e-05	0	0	0	0	0	0	0	0	0	0	0	0	0	0
427	1	427	0	0	0	2	0	1	0	0	0	0	8520000	8540000	0	0	0	1.04224e-05	0	1.39678e-05	0	0	0	0	0	0	0	0	0	0	0	5.17889e-07	0	2.7115e-06	3.22939e-06	0	0	0	0	0	0	0	0	0	0	0	0	0	0
428	1	428	0	0	0	0	0	0	1	0	0	0	8540000	8560000	0	0	0	0	0	0	1.16649e-05	0	0	0	0	0	0	0	0	0	0	0	6.11658e-07	0	6.11658e-07	0	0	0	0	0	0	0	0	0	0	0	0	0	0
429	1	429	0	0	0	2	0	1	0	0	0	1	8560000	8580000	0	0	0	1.04224e-05	0	1.39678e-05	0	0	0	0.000147449	0	0	0	1.93976e-05	0	0	0	5.17889e-07	0	2.7115e-06	2.2627e-05	0	0	0	0	0	0	0	0	0	0	0	0	0	0
430	1	430	0	0	0	3	0	0	0	0	1	0	8580000	8600000	0	0	0	1.56335e-05	0	0	0	0	1.82652e-05	0	0	0	0	0	0	0	6.57388e-07	0	0	4.06725e-06	4.72463e-06	0	0	0	0	0	0	0	0	0	0	0	0	0	0
431	1	431	0	0	0	2	0	0	1	2	0	0	8600000	8620000	0	0	0	1.04224e-05	0	0	1.16649e-05	4.17179e-05	0	0	0	0	0	0	0	7.19677e-06	0	0	6.11658e-07	2.7115e-06	1.05199e-05	0	0	0	0	0	0	0	0	0	0	0	0	0	0
432	1	432	0	0	0	1	0	1	1	0	0	0	8620000	8640000	0	0	0	5.21118e-06	0	1.39678e-05	1.16649e-05	0	0	0	0	0	0	0	0	0	0	5.17889e-07	6.11658e-07	1.35575e-06	2.4853e-06	0	0	0	0	0	0	0	0	0	0	0	0	0	0
433	1	433	0	0	0	0	0	1	0	0	0	0	8640000	8660000	0	0	0	0	0	1.39678e-05	0	0	0	0	0	0	0	0	0	0	0	5.17889e-07	0	0	5.17889e-07	0	0	0	0	0	0	0	0	0	0	0	0	0	0
434	1	434	0	0	0	0	0	0	0	0	0	0	8660000	8680000	0	0	0	0	0	0	0	0	0	0	0	0	0	0	0	0	0	0	0	0	0	0	0	0	0	0	0	0	0	0	0	0	0	0	0
435	1	435	0	0	0	5	0	2	0	0	0	0	8680000	8700000	0	0	0	2.60559e-05	0	2.79357e-05	0	0	0	0	0	0	0	0	0	0	0	1.03578e-06	0	6.77874e-06	7.81452e-06	0	0	0	0	0	0	0	0	0	0	0	0	0	0
436	1	436	0	0	0	0	0	1	0	0	0	0	8700000	8720000	0	0	0	0	0	1.39678e-05	0	0	0	0	0	0	0	0	0	0	0	5.17889e-07	0	0	5.17889e-07	0	0	0	0	0	0	0	0	0	0	0	0	0	0
437	1	437	0	0	0	0	0	0	0	0	0	0	8720000	8740000	0	0	0	0	0	0	0	0	0	0	0	0	0	0	0	0	0	0	0	0	0	0	0	0	0	0	0	0	0	0	0	0	0	0	0
438	1	438	0	0	0	0	3	3	0	0	0	0	8740000	8760000	0	0	0	0	0.000134463	4.19035e-05	0	0	0	0	0	0	0	0	1.63124e-05	0	0	1.55367e-06	0	0	1.78661e-05	0	0	0	0	0	0	0	0	0	0	0	0	0	0
439	1	439	0	0	0	0	2	0	0	0	1	0	8760000	8780000	0	0	0	0	8.96419e-05	0	0	0	1.82652e-05	0	0	0	0	0	1.0875e-05	0	6.57388e-07	0	0	0	1.15323e-05	0	0	0	0	0	0	0	0	0	0	0	0	0	0
440	1	440	0	0	0	0	1	0	0	0	2	0	8780000	8800000	0	0	0	0	4.48209e-05	0	0	0	3.65303e-05	0	0	0	0	0	5.43748e-06	0	1.31478e-06	0	0	0	6.75225e-06	0	0	0	0	0	0	0	0	0	0	0	0	0	0
441	1	441	0	0	0	3	2	0	0	0	0	0	8800000	8820000	0	0	0	1.56335e-05	8.96419e-05	0	0	0	0	0	0	0	0	0	1.0875e-05	0	0	0	0	4.06725e-06	1.49422e-05	0	0	0	0	0	0	0	0	0	0	0	0	0	0
442	1	442	0	0	0	1	0	0	0	0	2	0	8820000	8840000	0	0	0	5.21118e-06	0	0	0	0	3.65303e-05	0	0	0	0	0	0	0	1.31478e-06	0	0	1.35575e-06	2.67052e-06	0	0	0	0	0	0	0	0	0	0	0	0	0	0
443	1	443	0	0	0	0	0	0	0	0	0	0	8840000	8860000	0	0	0	0	0	0	0	0	0	0	0	0	0	0	0	0	0	0	0	0	0	0	0	0	0	0	0	0	0	0	0	0	0	0	0
444	1	444	0	0	0	0	0	1	0	0	0	0	8860000	8880000	0	0	0	0	0	1.39678e-05	0	0	0	0	0	0	0	0	0	0	0	5.17889e-07	0	0	5.17889e-07	0	0	0	0	0	0	0	0	0	0	0	0	0	0
445	1	445	0	0	0	1	0	2	2	0	0	0	8880000	8900000	0	0	0	5.21118e-06	0	2.79357e-05	2.33299e-05	0	0	0	0	0	0	0	0	0	0	1.03578e-06	1.22332e-06	1.35575e-06	3.61484e-06	0	0	0	0	0	0	0	0	0	0	0	0	0	0
446	1	446	0	0	0	2	0	1	0	1	0	0	8900000	8920000	0	0	0	1.04224e-05	0	1.39678e-05	0	2.0859e-05	0	0	0	0	0	0	0	3.59838e-06	0	5.17889e-07	0	2.7115e-06	6.82777e-06	0	0	0	0	0	0	0	0	0	0	0	0	0	0
447	1	447	0	0	0	3	0	1	0	0	0	0	8920000	8940000	0	0	0	1.56335e-05	0	1.39678e-05	0	0	0	0	0	0	0	0	0	0	0	5.17889e-07	0	4.06725e-06	4.58513e-06	0	0	0	0	0	0	0	0	0	0	0	0	0	0
448	1	448	0	0	0	3	0	0	1	0	0	0	8940000	8960000	0	0	0	1.56335e-05	0	0	1.16649e-05	0	0	0	0	0	0	0	0	0	0	0	6.11658e-07	4.06725e-06	4.6789e-06	0	0	0	0	0	0	0	0	0	0	0	0	0	0
449	1	449	0	0	0	0	0	1	0	0	0	0	8960000	8980000	0	0	0	0	0	1.39678e-05	0	0	0	0	0	0	0	0	0	0	0	5.17889e-07	0	0	5.17889e-07	0	0	0	0	0	0	0	0	0	0	0	0	0	0
450	1	450	0	0	0	0	0	0	0	0	0	0	8980000	9000000	0	0	0	0	0	0	0	0	0	0	0	0	0	0	0	0	0	0	0	0	0	0	0	0	0	0	0	0	0	0	0	0	0	0	0
451	1	451	0	0	0	0	0	0	0	0	1	0	9000000	9020000	0	0	0	0	0	0	0	0	1.82652e-05	0	0	0	0	0	0	0	6.57388e-07	0	0	0	6.57388e-07	0	0	0	0	0	0	0	0	0	0	0	0	0	0
452	1	452	0	0	0	0	0	0	3	0	1	0	9020000	9040000	0	0	0	0	0	0	3.49948e-05	0	1.82652e-05	0	0	0	0	0	0	0	6.57388e-07	0	1.83497e-06	0	2.49236e-06	0	0	0	0	0	0	0	0	0	0	0	0	0	0
453	1	453	0	0	0	0	0	0	2	0	1	0	9040000	9060000	0	0	0	0	0	0	2.33299e-05	0	1.82652e-05	0	0	0	0	0	0	0	6.57388e-07	0	1.22332e-06	0	1.8807e-06	0	0	0	0	0	0	0	0	0	0	0	0	0	0
454	1	454	0	0	0	5	0	0	2	0	0	0	9060000	9080000	0	0	0	2.60559e-05	0	0	2.33299e-05	0	0	0	0	0	0	0	0	0	0	0	1.22332e-06	6.77874e-06	8.00206e-06	0	0	0	0	0	0	0	0	0	0	0	0	0	0
455	1	455	0	0	0	7	1	0	0	0	0	0	9080000	9100000	0	0	0	3.64783e-05	4.48209e-05	0	0	0	0	0	0	0	0	0	5.43748e-06	0	0	0	0	9.49024e-06	1.49277e-05	0	0	0	0	0	0	0	0	0	0	0	0	0	0
456	1	456	0	0	0	2	0	0	0	0	0	0	9100000	9120000	0	0	0	1.04224e-05	0	0	0	0	0	0	0	0	0	0	0	0	0	0	0	2.7115e-06	2.7115e-06	0	0	0	0	0	0	0	0	0	0	0	0	0	0
457	1	457	1	0	0	2	0	0	0	2	0	0	9120000	9140000	0.000429923	0	0	1.04224e-05	0	0	0	4.17179e-05	0	0	6.1227e-05	0	0	0	0	7.19677e-06	0	0	0	2.7115e-06	7.11352e-05	0	0	0	0	0	0	0	0	0	0	0	0	0	0
458	1	458	0	0	0	0	0	2	1	0	0	0	9140000	9160000	0	0	0	0	0	2.79357e-05	1.16649e-05	0	0	0	0	0	0	0	0	0	0	1.03578e-06	6.11658e-07	0	1.64744e-06	0	0	0	0	0	0	0	0	0	0	0	0	0	0
459	1	459	0	0	0	1	0	0	0	0	0	0	9160000	9180000	0	0	0	5.21118e-06	0	0	0	0	0	0	0	0	0	0	0	0	0	0	0	1.35575e-06	1.35575e-06	0	0	0	0	0	0	0	0	0	0	0	0	0	0
460	1	460	0	0	0	3	0	0	0	0	0	0	9180000	9200000	0	0	0	1.56335e-05	0	0	0	0	0	0	0	0	0	0	0	0	0	0	0	4.06725e-06	4.06725e-06	0	0	0	0	0	0	0	0	0	0	0	0	0	0
461	1	461	0	0	0	1	0	0	0	0	0	0	9200000	9220000	0	0	0	5.21118e-06	0	0	0	0	0	0	0	0	0	0	0	0	0	0	0	1.35575e-06	1.35575e-06	0	0	0	0	0	0	0	0	0	0	0	0	0	0
462	1	462	0	0	0	1	0	0	0	0	0	0	9220000	9240000	0	0	0	5.21118e-06	0	0	0	0	0	0	0	0	0	0	0	0	0	0	0	1.35575e-06	1.35575e-06	0	0	0	0	0	0	0	0	0	0	0	0	0	0
463	1	463	0	0	0	1	1	0	2	0	0	0	9240000	9260000	0	0	0	5.21118e-06	4.48209e-05	0	2.33299e-05	0	0	0	0	0	0	0	5.43748e-06	0	0	0	1.22332e-06	1.35575e-06	8.01654e-06	0	0	0	0	0	0	0	0	0	0	0	0	0	0
464	1	464	0	0	0	1	0	0	0	0	0	0	9260000	9280000	0	0	0	5.21118e-06	0	0	0	0	0	0	0	0	0	0	0	0	0	0	0	1.35575e-06	1.35575e-06	0	0	0	0	0	0	0	0	0	0	0	0	0	0
465	1	465	0	0	0	0	0	1	1	0	0	0	9280000	9300000	0	0	0	0	0	1.39678e-05	1.16649e-05	0	0	0	0	0	0	0	0	0	0	5.17889e-07	6.11658e-07	0	1.12955e-06	0	0	0	0	0	0	0	0	0	0	0	0	0	0
466	1	466	0	0	0	0	0	0	1	0	0	0	9300000	9320000	0	0	0	0	0	0	1.16649e-05	0	0	0	0	0	0	0	0	0	0	0	6.11658e-07	0	6.11658e-07	0	0	0	0	0	0	0	0	0	0	0	0	0	0
467	1	467	2	0	0	0	3	0	1	0	0	0	9320000	9340000	0.000859845	0	0	0	0.000134463	0	1.16649e-05	0	0	0	0.000122454	0	0	0	1.63124e-05	0	0	0	6.11658e-07	0	0.000139378	0	0	0	0	0	0	0	0	0	0	0	0	0	0
468	1	468	0	0	0	0	0	1	2	0	1	0	9340000	9360000	0	0	0	0	0	1.39678e-05	2.33299e-05	0	1.82652e-05	0	0	0	0	0	0	0	6.57388e-07	5.17889e-07	1.22332e-06	0	2.39859e-06	0	0	0	0	0	0	0	0	0	0	0	0	0	0
469	1	469	0	0	0	1	1	0	0	0	0	0	9360000	9380000	0	0	0	5.21118e-06	4.48209e-05	0	0	0	0	0	0	0	0	0	5.43748e-06	0	0	0	0	1.35575e-06	6.79323e-06	0	0	0	0	0	0	0	0	0	0	0	0	0	0
470	1	470	0	0	0	0	0	0	0	0	0	0	9380000	9400000	0	0	0	0	0	0	0	0	0	0	0	0	0	0	0	0	0	0	0	0	0	0	0	0	0	0	0	0	0	0	0	0	0	0	0
471	1	471	0	0	0	1	0	0	1	0	0	0	9400000	9420000	0	0	0	5.21118e-06	0	0	1.16649e-05	0	0	0	0	0	0	0	0	0	0	0	6.11658e-07	1.35575e-06	1.96741e-06	0	0	0	0	0	0	0	0	0	0	0	0	0	0
472	1	472	0	0	0	3	0	0	1	0	0	0	9420000	9440000	0	0	0	1.56335e-05	0	0	1.16649e-05	0	0	0	0	0	0	0	0	0	0	0	6.11658e-07	4.06725e-06	4.6789e-06	0	0	0	0	0	0	0	0	0	0	0	0	0	0
473	1	473	0	0	0	1	0	0	0	1	0	0	9440000	9460000	0	0	0	5.21118e-06	0	0	0	2.0859e-05	0	0	0	0	0	0	0	3.59838e-06	0	0	0	1.35575e-06	4.95413e-06	0	0	0	0	0	0	0	0	0	0	0	0	0	0
474	1	474	0	0	0	1	0	0	0	0	1	0	9460000	9480000	0	0	0	5.21118e-06	0	0	0	0	1.82652e-05	0	0	0	0	0	0	0	6.57388e-07	0	0	1.35575e-06	2.01314e-06	0	0	0	0	0	0	0	0	0	0	0	0	0	0
475	1	475	0	0	0	2	0	0	0	0	0	0	9480000	9500000	0	0	0	1.04224e-05	0	0	0	0	0	0	0	0	0	0	0	0	0	0	0	2.7115e-06	2.7115e-06	0	0	0	0	0	0	0	0	0	0	0	0	0	0
476	1	476	0	0	0	0	0	6	2	0	0	0	9500000	9520000	0	0	0	0	0	8.38071e-05	2.33299e-05	0	0	0	0	0	0	0	0	0	0	3.10734e-06	1.22332e-06	0	4.33065e-06	0	0	0	0	0	0	0	0	0	0	0	0	0	0
477	1	477	0	0	0	1	0	12	0	0	0	0	9520000	9540000	0	0	0	5.21118e-06	0	0.000167614	0	0	0	0	0	0	0	0	0	0	0	6.21467e-06	0	1.35575e-06	7.57042e-06	0	0	0	0	0	1	0	0	0	0	0	0	0	0
478	1	478	0	0	0	1	0	0	0	0	0	0	9540000	9560000	0	0	0	5.21118e-06	0	0	0	0	0	0	0	0	0	0	0	0	0	0	0	1.35575e-06	1.35575e-06	0	0	0	0	0	0	0	0	0	0	0	0	0	0
479	1	479	0	0	0	0	0	0	0	10	1	0	9560000	9580000	0	0	0	0	0	0	0	0.00020859	1.82652e-05	0	0	0	0	0	0	3.59838e-05	6.57388e-07	0	0	0	3.66412e-05	0	0	0	0	0	0	0	0	0	0	0	0	0	0
480	1	480	0	0	0	1	0	0	0	10	2	0	9580000	9600000	0	0	0	5.21118e-06	0	0	0	0.00020859	3.65303e-05	0	0	0	0	0	0	3.59838e-05	1.31478e-06	0	0	1.35575e-06	3.86544e-05	0	0	0	0	0	0	0	0	0	0	0	0	0	0
481	1	481	0	0	0	0	1	0	0	0	1	0	9600000	9620000	0	0	0	0	4.48209e-05	0	0	0	1.82652e-05	0	0	0	0	0	5.43748e-06	0	6.57388e-07	0	0	0	6.09486e-06	0	0	0	0	0	0	0	0	0	0	0	0	0	0
482	1	482	0	0	0	3	1	1	0	0	0	0	9620000	9640000	0	0	0	1.56335e-05	4.48209e-05	1.39678e-05	0	0	0	0	0	0	0	0	5.43748e-06	0	0	5.17889e-07	0	4.06725e-06	1.00226e-05	0	0	0	0	0	0	0	0	0	0	0	0	0	0
483	1	483	0	0	0	1	0	0	1	10	1	0	9640000	9660000	0	0	0	5.21118e-06	0	0	1.16649e-05	0.00020859	1.82652e-05	0	0	0	0	0	0	3.59838e-05	6.57388e-07	0	6.11658e-07	1.35575e-06	3.86086e-05	0	0	0	0	0	0	0	0	0	0	0	0	0	0
484	1	484	0	0	0	3	2	0	1	0	0	0	9660000	9680000	0	0	0	1.56335e-05	8.96419e-05	0	1.16649e-05	0	0	0	0	0	0	0	1.0875e-05	0	0	0	6.11658e-07	4.06725e-06	1.55539e-05	0	0	0	0	0	0	0	0	0	0	0	0	0	0
485	1	485	0	0	0	1	0	0	1	0	1	0	9680000	9700000	0	0	0	5.21118e-06	0	0	1.16649e-05	0	1.82652e-05	0	0	0	0	0	0	0	6.57388e-07	0	6.11658e-07	1.35575e-06	2.62479e-06	0	0	0	0	0	0	0	0	0	0	0	0	0	0
486	1	486	0	0	0	0	1	0	0	0	0	0	9700000	9720000	0	0	0	0	4.48209e-05	0	0	0	0	0	0	0	0	0	5.43748e-06	0	0	0	0	0	5.43748e-06	0	0	0	0	0	0	0	0	0	0	0	0	0	0
487	1	487	0	0	0	1	0	1	0	0	0	0	9720000	9740000	0	0	0	5.21118e-06	0	1.39678e-05	0	0	0	0	0	0	0	0	0	0	0	5.17889e-07	0	1.35575e-06	1.87364e-06	0	0	0	0	0	0	0	0	0	0	0	0	0	0
488	1	488	0	0	0	6	5	1	0	0	0	0	9740000	9760000	0	0	0	3.12671e-05	0.000224105	1.39678e-05	0	0	0	0	0	0	0	0	2.71874e-05	0	0	5.17889e-07	0	8.13449e-06	3.58398e-05	0	0	0	0	0	0	0	0	0	0	0	0	0	0
489	1	489	0	0	0	1	0	0	0	0	1	0	9760000	9780000	0	0	0	5.21118e-06	0	0	0	0	1.82652e-05	0	0	0	0	0	0	0	6.57388e-07	0	0	1.35575e-06	2.01314e-06	0	0	0	0	0	0	0	0	0	0	0	0	0	0
490	1	490	0	0	0	0	0	0	0	0	0	0	9780000	9800000	0	0	0	0	0	0	0	0	0	0	0	0	0	0	0	0	0	0	0	0	0	0	0	0	0	0	0	0	0	0	0	0	0	0	0
491	1	491	0	0	0	3	0	0	0	0	1	0	9800000	9820000	0	0	0	1.56335e-05	0	0	0	0	1.82652e-05	0	0	0	0	0	0	0	6.57388e-07	0	0	4.06725e-06	4.72463e-06	0	0	0	0	0	0	0	0	0	0	0	0	0	0
492	1	492	0	0	0	0	0	0	0	0	2	0	9820000	9840000	0	0	0	0	0	0	0	0	3.65303e-05	0	0	0	0	0	0	0	1.31478e-06	0	0	0	1.31478e-06	0	0	0	0	0	0	0	0	0	0	0	0	0	0
493	1	493	0	0	0	1	0	1	0	0	0	0	9840000	9860000	0	0	0	5.21118e-06	0	1.39678e-05	0	0	0	0	0	0	0	0	0	0	0	5.17889e-07	0	1.35575e-06	1.87364e-06	0	0	0	0	0	0	0	0	0	0	0	0	0	0
494	1	494	0	0	0	5	0	0	0	0	0	0	9860000	9880000	0	0	0	2.60559e-05	0	0	0	0	0	0	0	0	0	0	0	0	0	0	0	6.77874e-06	6.77874e-06	0	0	0	0	0	0	0	0	0	0	0	0	0	0
495	1	495	0	0	0	3	0	0	0	0	3	0	9880000	9900000	0	0	0	1.56335e-05	0	0	0	0	5.47955e-05	0	0	0	0	0	0	0	1.97216e-06	0	0	4.06725e-06	6.03941e-06	0	0	0	0	0	0	0	0	0	0	0	0	0	0
496	1	496	0	0	0	0	0	0	0	0	0	0	9900000	9920000	0	0	0	0	0	0	0	0	0	0	0	0	0	0	0	0	0	0	0	0	0	0	0	0	0	0	0	0	0	0	0	0	0	0	0
497	1	497	0	0	0	3	0	0	0	1	0	0	9920000	9940000	0	0	0	1.56335e-05	0	0	0	2.0859e-05	0	0	0	0	0	0	0	3.59838e-06	0	0	0	4.06725e-06	7.66563e-06	0	0	0	0	0	0	0	0	0	0	0	0	0	0
498	1	498	0	0	0	0	0	0	1	0	0	0	9940000	9960000	0	0	0	0	0	0	1.16649e-05	0	0	0	0	0	0	0	0	0	0	0	6.11658e-07	0	6.11658e-07	0	0	0	0	0	0	0	0	0	0	0	0	0	0
499	1	499	0	0	0	0	0	7	0	0	0	0	9960000	9980000	0	0	0	0	0	9.77749e-05	0	0	0	0	0	0	0	0	0	0	0	3.62523e-06	0	0	3.62523e-06	0	0	0	0	0	0	0	0	0	0	0	0	0	0
500	1	500	0	0	0	2	0	1	2	0	0	0	9980000	10000000	0	0	0	1.04224e-05	0	1.39678e-05	2.33299e-05	0	0	0	0	0	0	0	0	0	0	5.17889e-07	1.22332e-06	2.7115e-06	4.4527e-06	0	0	0	0	0	0	0	0	0	0	0	0	0	0
501	1	501	0	0	0	0	0	0	3	0	0	0	10000000	10020000	0	0	0	0	0	0	3.49948e-05	0	0	0	0	0	0	0	0	0	0	0	1.83497e-06	0	1.83497e-06	0	0	0	0	0	0	0	0	0	0	0	0	0	0
502	1	502	0	0	0	1	0	0	3	0	0	0	10020000	10040000	0	0	0	5.21118e-06	0	0	3.49948e-05	0	0	0	0	0	0	0	0	0	0	0	1.83497e-06	1.35575e-06	3.19072e-06	0	0	0	0	0	0	0	0	0	0	0	0	0	0
503	1	503	0	0	0	0	0	0	0	0	0	0	10040000	10060000	0	0	0	0	0	0	0	0	0	0	0	0	0	0	0	0	0	0	0	0	0	0	0	0	0	0	0	0	0	0	0	0	0	0	0
504	1	504	0	0	0	0	0	0	1	0	2	0	10060000	10080000	0	0	0	0	0	0	1.16649e-05	0	3.65303e-05	0	0	0	0	0	0	0	1.31478e-06	0	6.11658e-07	0	1.92643e-06	0	0	0	0	0	0	0	0	0	0	0	0	0	0
505	1	505	0	0	0	1	0	0	5	0	0	0	10080000	10100000	0	0	0	5.21118e-06	0	0	5.83247e-05	0	0	0	0	0	0	0	0	0	0	0	3.05829e-06	1.35575e-06	4.41404e-06	0	0	0	0	0	0	0	0	0	0	0	0	0	0
506	1	506	0	0	0	0	1	2	2	0	0	0	10100000	10120000	0	0	0	0	4.48209e-05	2.79357e-05	2.33299e-05	0	0	0	0	0	0	0	5.43748e-06	0	0	1.03578e-06	1.22332e-06	0	7.69657e-06	0	0	0	0	0	0	0	0	0	0	0	0	0	0
507	1	507	0	0	0	0	0	0	0	0	0	0	10120000	10140000	0	0	0	0	0	0	0	0	0	0	0	0	0	0	0	0	0	0	0	0	0	0	0	0	0	0	0	0	0	0	0	0	0	0	0
508	1	508	0	0	0	2	0	0	1	0	0	0	10140000	10160000	0	0	0	1.04224e-05	0	0	1.16649e-05	0	0	0	0	0	0	0	0	0	0	0	6.11658e-07	2.7115e-06	3.32315e-06	0	0	0	0	0	0	0	0	0	0	0	0	0	0
509	1	509	0	0	0	2	0	0	1	0	0	0	10160000	10180000	0	0	0	1.04224e-05	0	0	1.16649e-05	0	0	0	0	0	0	0	0	0	0	0	6.11658e-07	2.7115e-06	3.32315e-06	0	0	0	0	0	0	0	0	0	0	0	0	0	0
510	1	510	0	0	0	0	0	0	0	0	0	0	10180000	10200000	0	0	0	0	0	0	0	0	0	0	0	0	0	0	0	0	0	0	0	0	0	0	0	0	0	0	0	0	0	0	0	0	0	0	0
511	1	511	0	0	0	0	0	0	0	0	1	0	10200000	10220000	0	0	0	0	0	0	0	0	1.82652e-05	0	0	0	0	0	0	0	6.57388e-07	0	0	0	6.57388e-07	0	0	0	0	0	0	0	0	0	0	0	0	0	0
512	1	512	0	0	0	1	0	3	0	0	0	0	10220000	10240000	0	0	0	5.21118e-06	0	4.19035e-05	0	0	0	0	0	0	0	0	0	0	0	1.55367e-06	0	1.35575e-06	2.90942e-06	0	0	0	0	0	0	0	0	0	0	0	0	0	0
513	1	513	0	0	0	1	0	1	0	0	0	2	10240000	10260000	0	0	0	5.21118e-06	0	1.39678e-05	0	0	0	0.000294898	0	0	0	3.87952e-05	0	0	0	5.17889e-07	0	1.35575e-06	4.06688e-05	0	0	0	0	0	0	0	0	0	0	0	0	0	0
514	1	514	0	0	0	1	0	0	0	0	0	2	10260000	10280000	0	0	0	5.21118e-06	0	0	0	0	0	0.000294898	0	0	0	3.87952e-05	0	0	0	0	0	1.35575e-06	4.01509e-05	0	0	0	0	0	0	0	0	0	0	0	0	0	0
515	1	515	0	0	0	0	0	0	1	0	0	0	10280000	10300000	0	0	0	0	0	0	1.16649e-05	0	0	0	0	0	0	0	0	0	0	0	6.11658e-07	0	6.11658e-07	0	0	0	0	0	0	0	0	0	0	0	0	0	0
516	1	516	0	0	0	0	0	0	0	0	0	0	10300000	10320000	0	0	0	0	0	0	0	0	0	0	0	0	0	0	0	0	0	0	0	0	0	0	0	0	0	0	0	0	0	0	0	0	0	0	0
517	1	517	0	0	0	0	0	0	0	0	0	0	10320000	10340000	0	0	0	0	0	0	0	0	0	0	0	0	0	0	0	0	0	0	0	0	0	0	0	0	0	0	0	0	0	0	0	0	0	0	0
518	1	518	0	0	0	1	0	0	1	0	0	4	10340000	10360000	0	0	0	5.21118e-06	0	0	1.16649e-05	0	0	0.000589797	0	0	0	7.75904e-05	0	0	0	0	6.11658e-07	1.35575e-06	7.95578e-05	0	0	0	0	0	0	0	0	0	0	0	0	0	0
519	1	519	0	0	0	1	0	0	0	0	0	0	10360000	10380000	0	0	0	5.21118e-06	0	0	0	0	0	0	0	0	0	0	0	0	0	0	0	1.35575e-06	1.35575e-06	0	0	0	0	0	0	0	0	0	0	0	0	0	0
520	1	520	0	0	0	0	4	2	0	0	1	0	10380000	10400000	0	0	0	0	0.000179284	2.79357e-05	0	0	1.82652e-05	0	0	0	0	0	2.17499e-05	0	6.57388e-07	1.03578e-06	0	0	2.34431e-05	0	0	0	0	0	0	0	0	0	0	0	0	0	0
521	1	521	0	0	0	3	0	0	0	0	1	0	10400000	10420000	0	0	0	1.56335e-05	0	0	0	0	1.82652e-05	0	0	0	0	0	0	0	6.57388e-07	0	0	4.06725e-06	4.72463e-06	0	0	0	0	0	0	0	0	0	0	0	0	0	0
522	1	522	0	0	0	1	0	2	1	0	0	0	10420000	10440000	0	0	0	5.21118e-06	0	2.79357e-05	1.16649e-05	0	0	0	0	0	0	0	0	0	0	1.03578e-06	6.11658e-07	1.35575e-06	3.00319e-06	0	0	0	0	0	0	0	0	0	0	0	0	0	0
523	1	523	0	0	0	0	0	0	2	0	0	0	10440000	10460000	0	0	0	0	0	0	2.33299e-05	0	0	0	0	0	0	0	0	0	0	0	1.22332e-06	0	1.22332e-06	0	0	0	0	0	0	0	0	0	0	0	0	0	0
524	1	524	0	0	0	1	1	0	0	0	0	0	10460000	10480000	0	0	0	5.21118e-06	4.48209e-05	0	0	0	0	0	0	0	0	0	5.43748e-06	0	0	0	0	1.35575e-06	6.79323e-06	0	0	0	0	0	0	0	0	0	0	0	0	0	0
525	1	525	0	0	0	1	0	0	1	0	0	0	10480000	10500000	0	0	0	5.21118e-06	0	0	1.16649e-05	0	0	0	0	0	0	0	0	0	0	0	6.11658e-07	1.35575e-06	1.96741e-06	0	0	0	0	0	0	0	0	0	0	0	0	0	0
526	1	526	0	0	0	0	0	2	0	0	0	0	10500000	10520000	0	0	0	0	0	2.79357e-05	0	0	0	0	0	0	0	0	0	0	0	1.03578e-06	0	0	1.03578e-06	0	0	0	0	0	0	0	0	0	0	0	0	0	0
527	1	527	0	0	0	0	0	0	0	0	0	0	10520000	10540000	0	0	0	0	0	0	0	0	0	0	0	0	0	0	0	0	0	0	0	0	0	0	0	0	0	0	0	0	0	0	0	0	0	0	0
528	1	528	0	0	0	0	0	0	1	0	0	0	10540000	10560000	0	0	0	0	0	0	1.16649e-05	0	0	0	0	0	0	0	0	0	0	0	6.11658e-07	0	6.11658e-07	0	0	0	0	0	0	0	0	0	0	0	0	0	0
529	1	529	0	0	0	2	0	0	2	0	2	0	10560000	10580000	0	0	0	1.04224e-05	0	0	2.33299e-05	0	3.65303e-05	0	0	0	0	0	0	0	1.31478e-06	0	1.22332e-06	2.7115e-06	5.24959e-06	0	0	0	0	0	0	0	0	0	0	0	0	0	0
530	1	530	0	0	0	1	1	0	0	0	0	0	10580000	10600000	0	0	0	5.21118e-06	4.48209e-05	0	0	0	0	0	0	0	0	0	5.43748e-06	0	0	0	0	1.35575e-06	6.79323e-06	0	0	0	0	0	0	0	0	0	0	0	0	0	0
531	1	531	0	0	0	0	0	0	0	0	0	0	10600000	10620000	0	0	0	0	0	0	0	0	0	0	0	0	0	0	0	0	0	0	0	0	0	0	0	0	0	0	0	0	0	0	0	0	0	0	0
532	1	532	0	0	0	1	0	0	2	0	0	0	10620000	10640000	0	0	0	5.21118e-06	0	0	2.33299e-05	0	0	0	0	0	0	0	0	0	0	0	1.22332e-06	1.35575e-06	2.57906e-06	0	0	0	0	0	0	0	0	0	0	0	0	0	0
533	1	533	0	0	0	0	0	2	0	0	2	0	10640000	10660000	0	0	0	0	0	2.79357e-05	0	0	3.65303e-05	0	0	0	0	0	0	0	1.31478e-06	1.03578e-06	0	0	2.35055e-06	0	0	0	0	0	0	0	0	0	0	0	0	0	0
534	1	534	0	0	0	3	0	0	0	0	0	0	10660000	10680000	0	0	0	1.56335e-05	0	0	0	0	0	0	0	0	0	0	0	0	0	0	0	4.06725e-06	4.06725e-06	0	0	0	0	0	0	0	0	0	0	0	0	0	0
535	1	535	0	0	0	0	0	3	1	0	0	0	10680000	10700000	0	0	0	0	0	4.19035e-05	1.16649e-05	0	0	0	0	0	0	0	0	0	0	1.55367e-06	6.11658e-07	0	2.16533e-06	0	0	0	0	0	0	0	0	0	0	0	0	0	0
536	1	536	0	0	0	1	0	0	0	0	0	0	10700000	10720000	0	0	0	5.21118e-06	0	0	0	0	0	0	0	0	0	0	0	0	0	0	0	1.35575e-06	1.35575e-06	0	0	0	0	0	0	0	0	0	0	0	0	0	0
537	1	537	0	0	0	6	0	0	2	0	0	0	10720000	10740000	0	0	0	3.12671e-05	0	0	2.33299e-05	0	0	0	0	0	0	0	0	0	0	0	1.22332e-06	8.13449e-06	9.35781e-06	0	0	0	0	0	0	0	0	0	0	0	0	0	0
538	1	538	0	0	0	2	0	1	3	0	0	0	10740000	10760000	0	0	0	1.04224e-05	0	1.39678e-05	3.49948e-05	0	0	0	0	0	0	0	0	0	0	5.17889e-07	1.83497e-06	2.7115e-06	5.06436e-06	0	0	0	0	0	0	0	0	0	0	0	0	0	0
539	1	539	0	0	0	4	2	2	0	0	0	0	10760000	10780000	0	0	0	2.08447e-05	8.96419e-05	2.79357e-05	0	0	0	0	0	0	0	0	1.0875e-05	0	0	1.03578e-06	0	5.42299e-06	1.73337e-05	0	0	0	0	0	0	0	0	0	0	0	0	0	0
540	1	540	0	0	0	0	0	3	0	0	1	0	10780000	10800000	0	0	0	0	0	4.19035e-05	0	0	1.82652e-05	0	0	0	0	0	0	0	6.57388e-07	1.55367e-06	0	0	2.21106e-06	0	0	0	0	0	0	0	0	0	0	0	0	0	0
541	1	541	0	0	0	2	0	1	0	0	1	0	10800000	10820000	0	0	0	1.04224e-05	0	1.39678e-05	0	0	1.82652e-05	0	0	0	0	0	0	0	6.57388e-07	5.17889e-07	0	2.7115e-06	3.88677e-06	0	0	0	0	0	0	0	0	0	0	0	0	0	0
542	1	542	0	0	0	2	0	0	0	0	0	0	10820000	10840000	0	0	0	1.04224e-05	0	0	0	0	0	0	0	0	0	0	0	0	0	0	0	2.7115e-06	2.7115e-06	0	0	0	0	0	0	0	0	0	0	0	0	0	0
543	1	543	0	0	0	3	0	0	0	0	0	0	10840000	10860000	0	0	0	1.56335e-05	0	0	0	0	0	0	0	0	0	0	0	0	0	0	0	4.06725e-06	4.06725e-06	0	0	0	0	0	0	0	0	0	0	0	0	0	0
544	1	544	0	0	0	1	0	0	2	0	0	0	10860000	10880000	0	0	0	5.21118e-06	0	0	2.33299e-05	0	0	0	0	0	0	0	0	0	0	0	1.22332e-06	1.35575e-06	2.57906e-06	0	0	0	0	0	0	0	0	0	0	0	0	0	0
545	1	545	0	0	0	1	0	2	2	0	0	0	10880000	10900000	0	0	0	5.21118e-06	0	2.79357e-05	2.33299e-05	0	0	0	0	0	0	0	0	0	0	1.03578e-06	1.22332e-06	1.35575e-06	3.61484e-06	0	0	0	0	0	0	0	0	0	0	0	0	0	0
546	1	546	0	0	0	2	0	0	0	0	0	0	10900000	10920000	0	0	0	1.04224e-05	0	0	0	0	0	0	0	0	0	0	0	0	0	0	0	2.7115e-06	2.7115e-06	0	0	0	0	0	0	0	0	0	0	0	0	0	0
547	1	547	0	0	0	0	0	0	0	0	0	0	10920000	10940000	0	0	0	0	0	0	0	0	0	0	0	0	0	0	0	0	0	0	0	0	0	0	0	0	0	0	0	0	0	0	0	0	0	0	0
548	1	548	0	0	0	1	0	0	0	0	2	0	10940000	10960000	0	0	0	5.21118e-06	0	0	0	0	3.65303e-05	0	0	0	0	0	0	0	1.31478e-06	0	0	1.35575e-06	2.67052e-06	0	0	0	0	0	0	0	0	0	0	0	0	0	0
549	1	549	0	0	0	0	0	0	1	0	1	0	10960000	10980000	0	0	0	0	0	0	1.16649e-05	0	1.82652e-05	0	0	0	0	0	0	0	6.57388e-07	0	6.11658e-07	0	1.26905e-06	0	0	0	0	0	0	0	0	0	0	0	0	0	0
550	1	550	0	0	0	0	0	0	0	0	2	0	10980000	11000000	0	0	0	0	0	0	0	0	3.65303e-05	0	0	0	0	0	0	0	1.31478e-06	0	0	0	1.31478e-06	0	0	0	0	0	0	0	0	0	0	0	0	0	0
551	1	551	0	1	0	2	0	1	2	0	0	0	11000000	11020000	0	0.000392773	0	1.04224e-05	0	1.39678e-05	2.33299e-05	0	0	0	0	0	2.68104e-06	0	0	0	0	5.17889e-07	1.22332e-06	2.7115e-06	7.13375e-06	0	0	0	0	0	0	0	0	0	0	0	0	0	0
552	1	552	0	3	0	0	0	2	0	0	0	0	11020000	11040000	0	0.00117832	0	0	0	2.79357e-05	0	0	0	0	0	0	8.04313e-06	0	0	0	0	1.03578e-06	0	0	9.07891e-06	0	1	0	0	0	0	0	0	0	0	0	0	0	0
553	1	553	0	0	0	0	0	0	1	0	0	0	11040000	11060000	0	0	0	0	0	0	1.16649e-05	0	0	0	0	0	0	0	0	0	0	0	6.11658e-07	0	6.11658e-07	0	0	0	0	0	0	0	0	0	0	0	0	0	0
554	1	554	0	0	0	4	0	1	0	0	0	0	11060000	11080000	0	0	0	2.08447e-05	0	1.39678e-05	0	0	0	0	0	0	0	0	0	0	0	5.17889e-07	0	5.42299e-06	5.94088e-06	0	0	0	0	0	0	0	0	0	0	0	0	0	0
555	1	555	0	0	0	2	1	0	0	0	0	0	11080000	11100000	0	0	0	1.04224e-05	4.48209e-05	0	0	0	0	0	0	0	0	0	5.43748e-06	0	0	0	0	2.7115e-06	8.14897e-06	0	0	0	0	0	0	0	0	0	0	0	0	0	0
556	1	556	0	0	0	4	1	0	0	0	0	0	11100000	11120000	0	0	0	2.08447e-05	4.48209e-05	0	0	0	0	0	0	0	0	0	5.43748e-06	0	0	0	0	5.42299e-06	1.08605e-05	0	0	0	0	0	0	0	0	0	0	0	0	0	0
557	1	557	0	0	0	3	0	0	1	0	0	0	11120000	11140000	0	0	0	1.56335e-05	0	0	1.16649e-05	0	0	0	0	0	0	0	0	0	0	0	6.11658e-07	4.06725e-06	4.6789e-06	0	0	0	0	0	0	0	0	0	0	0	0	0	0
558	1	558	0	0	0	2	0	1	0	0	3	0	11140000	11160000	0	0	0	1.04224e-05	0	1.39678e-05	0	0	5.47955e-05	0	0	0	0	0	0	0	1.97216e-06	5.17889e-07	0	2.7115e-06	5.20155e-06	0	0	0	0	0	0	0	0	0	0	0	0	0	0
559	1	559	0	0	0	0	0	7	0	0	0	0	11160000	11180000	0	0	0	0	0	9.77749e-05	0	0	0	0	0	0	0	0	0	0	0	3.62523e-06	0	0	3.62523e-06	0	0	0	0	0	0	0	0	0	0	0	0	0	0
560	1	560	0	0	0	1	0	0	0	0	0	0	11180000	11200000	0	0	0	5.21118e-06	0	0	0	0	0	0	0	0	0	0	0	0	0	0	0	1.35575e-06	1.35575e-06	0	0	0	0	0	0	0	0	0	0	0	0	0	0
561	1	561	0	0	0	0	0	0	0	0	0	0	11200000	11220000	0	0	0	0	0	0	0	0	0	0	0	0	0	0	0	0	0	0	0	0	0	0	0	0	0	0	0	0	0	0	0	0	0	0	0
562	1	562	0	0	0	1	0	0	0	0	0	0	11220000	11240000	0	0	0	5.21118e-06	0	0	0	0	0	0	0	0	0	0	0	0	0	0	0	1.35575e-06	1.35575e-06	0	0	0	0	0	0	0	0	0	0	0	0	0	0
563	1	563	0	0	0	1	0	5	0	0	0	0	11240000	11260000	0	0	0	5.21118e-06	0	6.98392e-05	0	0	0	0	0	0	0	0	0	0	0	2.58945e-06	0	1.35575e-06	3.9452e-06	0	0	0	0	0	0	0	0	0	0	0	0	0	0
564	1	564	0	0	0	2	0	0	1	0	0	0	11260000	11280000	0	0	0	1.04224e-05	0	0	1.16649e-05	0	0	0	0	0	0	0	0	0	0	0	6.11658e-07	2.7115e-06	3.32315e-06	0	0	0	0	0	0	0	0	0	0	0	0	0	0
565	1	565	0	0	0	0	0	3	1	0	0	0	11280000	11300000	0	0	0	0	0	4.19035e-05	1.16649e-05	0	0	0	0	0	0	0	0	0	0	1.55367e-06	6.11658e-07	0	2.16533e-06	0	0	0	0	0	0	0	0	0	0	0	0	0	0
566	1	566	0	0	0	0	0	1	0	0	0	0	11300000	11320000	0	0	0	0	0	1.39678e-05	0	0	0	0	0	0	0	0	0	0	0	5.17889e-07	0	0	5.17889e-07	0	0	0	0	0	0	0	0	0	0	0	0	0	0
567	1	567	0	0	0	2	0	0	0	0	0	0	11320000	11340000	0	0	0	1.04224e-05	0	0	0	0	0	0	0	0	0	0	0	0	0	0	0	2.7115e-06	2.7115e-06	0	0	0	0	0	0	0	0	0	0	0	0	0	0
568	1	568	0	0	0	0	0	0	0	0	1	0	11340000	11360000	0	0	0	0	0	0	0	0	1.82652e-05	0	0	0	0	0	0	0	6.57388e-07	0	0	0	6.57388e-07	0	0	0	0	0	0	0	0	0	0	0	0	0	0
569	1	569	0	0	0	1	0	5	0	0	0	0	11360000	11380000	0	0	0	5.21118e-06	0	6.98392e-05	0	0	0	0	0	0	0	0	0	0	0	2.58945e-06	0	1.35575e-06	3.9452e-06	0	0	0	0	0	0	0	0	0	0	0	0	0	0
570	1	570	0	0	0	0	0	0	1	0	0	0	11380000	11400000	0	0	0	0	0	0	1.16649e-05	0	0	0	0	0	0	0	0	0	0	0	6.11658e-07	0	6.11658e-07	0	0	0	0	0	0	0	0	0	0	0	0	0	0
571	1	571	0	0	0	1	0	4	0	0	0	0	11400000	11420000	0	0	0	5.21118e-06	0	5.58714e-05	0	0	0	0	0	0	0	0	0	0	0	2.07156e-06	0	1.35575e-06	3.42731e-06	0	0	0	0	0	0	0	0	0	0	0	0	0	0
572	1	572	0	0	0	2	0	0	0	0	0	0	11420000	11440000	0	0	0	1.04224e-05	0	0	0	0	0	0	0	0	0	0	0	0	0	0	0	2.7115e-06	2.7115e-06	0	0	0	0	0	0	0	0	0	0	0	0	0	0
573	1	573	0	0	0	0	0	0	0	0	0	0	11440000	11460000	0	0	0	0	0	0	0	0	0	0	0	0	0	0	0	0	0	0	0	0	0	0	0	0	0	0	0	0	0	0	0	0	0	0	0
574	1	574	0	0	0	0	0	1	0	0	0	0	11460000	11480000	0	0	0	0	0	1.39678e-05	0	0	0	0	0	0	0	0	0	0	0	5.17889e-07	0	0	5.17889e-07	0	0	0	0	0	0	0	0	0	0	0	0	0	0
575	1	575	0	0	0	0	0	2	0	0	0	0	11480000	11500000	0	0	0	0	0	2.79357e-05	0	0	0	0	0	0	0	0	0	0	0	1.03578e-06	0	0	1.03578e-06	0	0	0	0	0	0	0	0	0	0	0	0	0	0
576	1	576	0	0	0	1	0	0	1	0	0	0	11500000	11520000	0	0	0	5.21118e-06	0	0	1.16649e-05	0	0	0	0	0	0	0	0	0	0	0	6.11658e-07	1.35575e-06	1.96741e-06	0	0	0	0	0	0	0	0	0	0	0	0	0	0
577	1	577	0	0	0	0	0	2	0	0	0	1	11520000	11540000	0	0	0	0	0	2.79357e-05	0	0	0	0.000147449	0	0	0	1.93976e-05	0	0	0	1.03578e-06	0	0	2.04334e-05	0	0	0	0	0	0	0	0	0	0	0	0	0	0
578	1	578	0	0	0	0	0	0	4	2	0	0	11540000	11560000	0	0	0	0	0	0	4.66597e-05	4.17179e-05	0	0	0	0	0	0	0	7.19677e-06	0	0	2.44663e-06	0	9.6434e-06	0	0	0	0	0	0	0	0	0	0	0	0	0	0
579	1	579	0	0	0	7	0	0	2	0	0	0	11560000	11580000	0	0	0	3.64783e-05	0	0	2.33299e-05	0	0	0	0	0	0	0	0	0	0	0	1.22332e-06	9.49024e-06	1.07136e-05	0	0	0	0	0	0	0	0	0	0	0	0	0	0
580	1	580	0	0	0	0	0	0	0	0	0	0	11580000	11600000	0	0	0	0	0	0	0	0	0	0	0	0	0	0	0	0	0	0	0	0	0	0	0	0	0	0	0	0	0	0	0	0	0	0	0
581	1	581	0	0	0	2	0	0	0	0	0	0	11600000	11620000	0	0	0	1.04224e-05	0	0	0	0	0	0	0	0	0	0	0	0	0	0	0	2.7115e-06	2.7115e-06	0	0	0	0	0	0	0	0	0	0	0	0	0	0
582	1	582	0	0	0	0	0	0	0	0	0	0	11620000	11640000	0	0	0	0	0	0	0	0	0	0	0	0	0	0	0	0	0	0	0	0	0	0	0	0	0	0	0	0	0	0	0	0	0	0	0
583	1	583	0	0	0	0	0	0	1	0	0	0	11640000	11660000	0	0	0	0	0	0	1.16649e-05	0	0	0	0	0	0	0	0	0	0	0	6.11658e-07	0	6.11658e-07	0	0	0	0	0	0	0	0	0	0	0	0	0	0
584	1	584	0	0	0	1	0	0	0	0	0	0	11660000	11680000	0	0	0	5.21118e-06	0	0	0	0	0	0	0	0	0	0	0	0	0	0	0	1.35575e-06	1.35575e-06	0	0	0	0	0	0	0	0	0	0	0	0	0	0
585	1	585	0	0	0	3	0	2	1	0	0	0	11680000	11700000	0	0	0	1.56335e-05	0	2.79357e-05	1.16649e-05	0	0	0	0	0	0	0	0	0	0	1.03578e-06	6.11658e-07	4.06725e-06	5.71468e-06	0	0	0	0	0	0	0	0	0	0	0	0	0	0
586	1	586	0	0	0	6	0	1	0	0	0	0	11700000	11720000	0	0	0	3.12671e-05	0	1.39678e-05	0	0	0	0	0	0	0	0	0	0	0	5.17889e-07	0	8.13449e-06	8.65238e-06	0	0	0	0	0	0	0	0	0	0	0	0	0	0
587	1	587	0	0	0	2	0	0	0	1	0	0	11720000	11740000	0	0	0	1.04224e-05	0	0	0	2.0859e-05	0	0	0	0	0	0	0	3.59838e-06	0	0	0	2.7115e-06	6.30988e-06	0	0	0	0	0	0	0	0	0	0	0	0	0	0
588	1	588	0	0	0	0	0	4	0	0	0	0	11740000	11760000	0	0	0	0	0	5.58714e-05	0	0	0	0	0	0	0	0	0	0	0	2.07156e-06	0	0	2.07156e-06	0	0	0	0	0	0	0	0	0	0	0	0	0	0
589	1	589	0	0	0	1	0	6	0	0	0	0	11760000	11780000	0	0	0	5.21118e-06	0	8.38071e-05	0	0	0	0	0	0	0	0	0	0	0	3.10734e-06	0	1.35575e-06	4.46308e-06	0	0	0	0	0	0	0	0	0	0	0	0	0	0
590	1	590	0	0	0	2	0	0	0	0	2	0	11780000	11800000	0	0	0	1.04224e-05	0	0	0	0	3.65303e-05	0	0	0	0	0	0	0	1.31478e-06	0	0	2.7115e-06	4.02627e-06	0	0	0	0	0	0	0	0	0	0	0	0	0	0
591	1	591	0	0	0	2	0	3	0	1	0	0	11800000	11820000	0	0	0	1.04224e-05	0	4.19035e-05	0	2.0859e-05	0	0	0	0	0	0	0	3.59838e-06	0	1.55367e-06	0	2.7115e-06	7.86355e-06	0	0	0	0	0	0	0	0	0	0	0	0	0	0
592	1	592	0	0	0	0	0	0	0	0	0	0	11820000	11840000	0	0	0	0	0	0	0	0	0	0	0	0	0	0	0	0	0	0	0	0	0	0	0	0	0	0	0	0	0	0	0	0	0	0	0
593	1	593	0	0	0	0	0	0	1	0	0	0	11840000	11860000	0	0	0	0	0	0	1.16649e-05	0	0	0	0	0	0	0	0	0	0	0	6.11658e-07	0	6.11658e-07	0	0	0	0	0	0	0	0	0	0	0	0	0	0
594	1	594	0	0	1	2	0	1	0	0	0	0	11860000	11880000	0	0	0.000640615	1.04224e-05	0	1.39678e-05	0	0	0	0	0	2.54417e-05	0	0	0	0	0	5.17889e-07	0	2.7115e-06	2.86711e-05	0	0	0	0	0	0	0	0	0	0	0	0	0	0
595	1	595	0	0	0	0	0	1	1	0	0	0	11880000	11900000	0	0	0	0	0	1.39678e-05	1.16649e-05	0	0	0	0	0	0	0	0	0	0	5.17889e-07	6.11658e-07	0	1.12955e-06	0	0	0	0	0	0	0	0	0	0	0	0	0	0
596	1	596	0	0	0	2	0	0	0	0	0	0	11900000	11920000	0	0	0	1.04224e-05	0	0	0	0	0	0	0	0	0	0	0	0	0	0	0	2.7115e-06	2.7115e-06	0	0	0	0	0	0	0	0	0	0	0	0	0	0
597	1	597	0	0	0	0	0	0	0	0	0	0	11920000	11940000	0	0	0	0	0	0	0	0	0	0	0	0	0	0	0	0	0	0	0	0	0	0	0	0	0	0	0	0	0	0	0	0	0	0	0
598	1	598	0	0	0	2	0	0	1	0	1	0	11940000	11960000	0	0	0	1.04224e-05	0	0	1.16649e-05	0	1.82652e-05	0	0	0	0	0	0	0	6.57388e-07	0	6.11658e-07	2.7115e-06	3.98054e-06	0	0	0	0	0	0	0	0	0	0	0	0	0	0
599	1	599	0	0	0	3	2	0	0	0	0	0	11960000	11980000	0	0	0	1.56335e-05	8.96419e-05	0	0	0	0	0	0	0	0	0	1.0875e-05	0	0	0	0	4.06725e-06	1.49422e-05	0	0	0	0	0	0	0	0	0	0	0	0	0	0
600	1	600	0	0	0	4	0	0	0	0	0	0	11980000	12000000	0	0	0	2.08447e-05	0	0	0	0	0	0	0	0	0	0	0	0	0	0	0	5.42299e-06	5.42299e-06	0	0	0	0	0	0	0	0	0	0	0	0	0	0
601	1	601	0	0	0	1	0	0	0	0	0	0	12000000	12020000	0	0	0	5.21118e-06	0	0	0	0	0	0	0	0	0	0	0	0	0	0	0	1.35575e-06	1.35575e-06	0	0	0	0	0	0	0	0	0	0	0	0	0	0
602	1	602	0	0	0	1	0	0	1	0	0	0	12020000	12040000	0	0	0	5.21118e-06	0	0	1.16649e-05	0	0	0	0	0	0	0	0	0	0	0	6.11658e-07	1.35575e-06	1.96741e-06	0	0	0	0	0	0	0	0	0	0	0	0	0	0
603	1	603	0	0	0	1	1	1	3	0	0	0	12040000	12060000	0	0	0	5.21118e-06	4.48209e-05	1.39678e-05	3.49948e-05	0	0	0	0	0	0	0	5.43748e-06	0	0	5.17889e-07	1.83497e-06	1.35575e-06	9.14609e-06	0	0	0	0	0	0	0	0	0	0	0	0	0	0
604	1	604	0	0	0	0	0	1	0	0	0	0	12060000	12080000	0	0	0	0	0	1.39678e-05	0	0	0	0	0	0	0	0	0	0	0	5.17889e-07	0	0	5.17889e-07	0	0	0	0	0	0	0	0	0	0	0	0	0	0
605	1	605	0	0	0	1	0	0	3	0	0	0	12080000	12100000	0	0	0	5.21118e-06	0	0	3.49948e-05	0	0	0	0	0	0	0	0	0	0	0	1.83497e-06	1.35575e-06	3.19072e-06	0	0	0	0	0	0	0	0	0	0	0	0	0	0
606	1	606	0	0	0	1	0	0	0	0	1	0	12100000	12120000	0	0	0	5.21118e-06	0	0	0	0	1.82652e-05	0	0	0	0	0	0	0	6.57388e-07	0	0	1.35575e-06	2.01314e-06	0	0	0	0	0	0	0	0	0	0	0	0	0	0
607	1	607	0	0	0	0	0	0	0	0	0	0	12120000	12140000	0	0	0	0	0	0	0	0	0	0	0	0	0	0	0	0	0	0	0	0	0	0	0	0	0	0	0	0	0	0	0	0	0	0	0
608	1	608	0	0	0	4	0	0	0	0	0	0	12140000	12160000	0	0	0	2.08447e-05	0	0	0	0	0	0	0	0	0	0	0	0	0	0	0	5.42299e-06	5.42299e-06	0	0	0	0	0	0	0	0	0	0	0	0	0	0
609	1	609	0	0	0	1	1	1	0	0	0	0	12160000	12180000	0	0	0	5.21118e-06	4.48209e-05	1.39678e-05	0	0	0	0	0	0	0	0	5.43748e-06	0	0	5.17889e-07	0	1.35575e-06	7.31111e-06	0	0	0	0	0	0	0	0	0	0	0	0	0	0
610	1	610	0	0	0	0	0	0	0	0	0	0	12180000	12200000	0	0	0	0	0	0	0	0	0	0	0	0	0	0	0	0	0	0	0	0	0	0	0	0	0	0	0	0	0	0	0	0	0	0	0
611	1	611	0	0	0	0	0	2	0	0	0	0	12200000	12220000	0	0	0	0	0	2.79357e-05	0	0	0	0	0	0	0	0	0	0	0	1.03578e-06	0	0	1.03578e-06	0	0	0	0	0	0	0	0	0	0	0	0	0	0
612	1	612	0	0	0	0	0	0	0	0	0	0	12220000	12240000	0	0	0	0	0	0	0	0	0	0	0	0	0	0	0	0	0	0	0	0	0	0	0	0	0	0	0	0	0	0	0	0	0	0	0
613	1	613	0	0	0	1	0	0	1	12	0	0	12240000	12260000	0	0	0	5.21118e-06	0	0	1.16649e-05	0.000250308	0	0	0	0	0	0	0	4.31806e-05	0	0	6.11658e-07	1.35575e-06	4.5148e-05	0	0	0	0	0	0	0	0	0	0	0	0	0	0
614	1	614	0	0	0	0	0	0	1	0	1	0	12260000	12280000	0	0	0	0	0	0	1.16649e-05	0	1.82652e-05	0	0	0	0	0	0	0	6.57388e-07	0	6.11658e-07	0	1.26905e-06	0	0	0	0	0	0	0	0	0	0	0	0	0	0
615	1	615	0	0	0	1	0	5	0	0	0	0	12280000	12300000	0	0	0	5.21118e-06	0	6.98392e-05	0	0	0	0	0	0	0	0	0	0	0	2.58945e-06	0	1.35575e-06	3.9452e-06	0	0	0	0	0	0	0	0	0	0	0	0	0	0
616	1	616	0	0	0	0	0	0	0	0	0	2	12300000	12320000	0	0	0	0	0	0	0	0	0	0.000294898	0	0	0	3.87952e-05	0	0	0	0	0	0	3.87952e-05	0	0	0	0	0	0	0	0	0	0	0	0	0	0
617	1	617	0	0	0	6	0	4	0	0	0	0	12320000	12340000	0	0	0	3.12671e-05	0	5.58714e-05	0	0	0	0	0	0	0	0	0	0	0	2.07156e-06	0	8.13449e-06	1.0206e-05	0	0	0	0	0	0	0	0	0	0	0	0	0	0
618	1	618	0	0	0	0	0	2	0	0	0	0	12340000	12360000	0	0	0	0	0	2.79357e-05	0	0	0	0	0	0	0	0	0	0	0	1.03578e-06	0	0	1.03578e-06	0	0	0	0	0	0	0	0	0	0	0	0	0	0
619	1	619	0	0	0	0	0	0	2	0	0	0	12360000	12380000	0	0	0	0	0	0	2.33299e-05	0	0	0	0	0	0	0	0	0	0	0	1.22332e-06	0	1.22332e-06	0	0	0	0	0	0	0	0	0	0	0	0	0	0
620	1	620	0	0	0	0	0	0	2	0	0	0	12380000	12400000	0	0	0	0	0	0	2.33299e-05	0	0	0	0	0	0	0	0	0	0	0	1.22332e-06	0	1.22332e-06	0	0	0	0	0	0	0	0	0	0	0	0	0	0
621	1	621	0	0	0	1	1	0	0	0	0	0	12400000	12420000	0	0	0	5.21118e-06	4.48209e-05	0	0	0	0	0	0	0	0	0	5.43748e-06	0	0	0	0	1.35575e-06	6.79323e-06	0	0	0	0	0	0	0	0	0	0	0	0	0	0
622	1	622	0	0	0	0	0	0	1	0	0	0	12420000	12440000	0	0	0	0	0	0	1.16649e-05	0	0	0	0	0	0	0	0	0	0	0	6.11658e-07	0	6.11658e-07	0	0	0	0	0	0	0	0	0	0	0	0	0	0
623	1	623	0	0	0	0	0	0	4	0	0	0	12440000	12460000	0	0	0	0	0	0	4.66597e-05	0	0	0	0	0	0	0	0	0	0	0	2.44663e-06	0	2.44663e-06	0	0	0	0	0	0	0	0	0	0	0	0	0	0
624	1	624	0	0	0	1	0	0	1	0	0	0	12460000	12480000	0	0	0	5.21118e-06	0	0	1.16649e-05	0	0	0	0	0	0	0	0	0	0	0	6.11658e-07	1.35575e-06	1.96741e-06	0	0	0	0	0	0	0	0	0	0	0	0	0	0
625	1	625	0	0	0	1	0	2	0	0	2	0	12480000	12500000	0	0	0	5.21118e-06	0	2.79357e-05	0	0	3.65303e-05	0	0	0	0	0	0	0	1.31478e-06	1.03578e-06	0	1.35575e-06	3.7063e-06	0	0	0	0	0	0	0	0	0	0	0	0	0	0
626	1	626	0	0	0	1	0	0	0	0	0	0	12500000	12520000	0	0	0	5.21118e-06	0	0	0	0	0	0	0	0	0	0	0	0	0	0	0	1.35575e-06	1.35575e-06	0	0	0	0	0	0	0	0	0	0	0	0	0	0
627	1	627	0	0	0	6	0	3	0	0	0	0	12520000	12540000	0	0	0	3.12671e-05	0	4.19035e-05	0	0	0	0	0	0	0	0	0	0	0	1.55367e-06	0	8.13449e-06	9.68816e-06	0	0	0	0	0	0	0	0	0	0	0	0	0	0
628	1	628	0	0	0	0	1	0	1	0	0	0	12540000	12560000	0	0	0	0	4.48209e-05	0	1.16649e-05	0	0	0	0	0	0	0	5.43748e-06	0	0	0	6.11658e-07	0	6.04913e-06	0	0	0	0	0	0	0	0	0	0	0	0	0	0
629	1	629	0	0	0	0	0	0	1	0	2	0	12560000	12580000	0	0	0	0	0	0	1.16649e-05	0	3.65303e-05	0	0	0	0	0	0	0	1.31478e-06	0	6.11658e-07	0	1.92643e-06	0	0	0	0	0	0	0	0	0	0	0	0	0	0
630	1	630	0	0	0	4	0	0	1	0	2	0	12580000	12600000	0	0	0	2.08447e-05	0	0	1.16649e-05	0	3.65303e-05	0	0	0	0	0	0	0	1.31478e-06	0	6.11658e-07	5.42299e-06	7.34943e-06	0	0	0	0	0	0	0	0	0	0	0	0	0	0
631	1	631	0	0	0	5	2	0	0	0	0	0	12600000	12620000	0	0	0	2.60559e-05	8.96419e-05	0	0	0	0	0	0	0	0	0	1.0875e-05	0	0	0	0	6.77874e-06	1.76537e-05	0	0	0	0	0	0	0	0	0	0	0	0	0	0
632	1	632	0	0	0	3	1	1	0	0	0	0	12620000	12640000	0	0	0	1.56335e-05	4.48209e-05	1.39678e-05	0	0	0	0	0	0	0	0	5.43748e-06	0	0	5.17889e-07	0	4.06725e-06	1.00226e-05	0	0	0	0	0	0	0	0	0	0	0	0	0	0
633	1	633	0	0	0	0	1	1	0	1	0	0	12640000	12660000	0	0	0	0	4.48209e-05	1.39678e-05	0	2.0859e-05	0	0	0	0	0	0	5.43748e-06	3.59838e-06	0	5.17889e-07	0	0	9.55375e-06	0	0	0	0	0	0	0	0	0	0	0	0	0	0
634	1	634	0	0	0	1	0	0	0	0	0	0	12660000	12680000	0	0	0	5.21118e-06	0	0	0	0	0	0	0	0	0	0	0	0	0	0	0	1.35575e-06	1.35575e-06	0	0	0	0	0	0	0	0	0	0	0	0	0	0
635	1	635	0	0	0	3	0	0	0	0	0	0	12680000	12700000	0	0	0	1.56335e-05	0	0	0	0	0	0	0	0	0	0	0	0	0	0	0	4.06725e-06	4.06725e-06	0	0	0	0	0	0	0	0	0	0	0	0	0	0
636	1	636	0	0	0	0	2	1	0	0	0	0	12700000	12720000	0	0	0	0	8.96419e-05	1.39678e-05	0	0	0	0	0	0	0	0	1.0875e-05	0	0	5.17889e-07	0	0	1.13928e-05	0	0	0	0	0	0	0	0	0	0	0	0	0	0
637	1	637	1	0	0	1	0	0	0	0	0	0	12720000	12740000	0.000429923	0	0	5.21118e-06	0	0	0	0	0	0	6.1227e-05	0	0	0	0	0	0	0	0	1.35575e-06	6.25827e-05	0	0	0	0	0	0	0	0	0	0	0	0	0	0
638	1	638	0	0	0	0	0	1	0	0	0	0	12740000	12760000	0	0	0	0	0	1.39678e-05	0	0	0	0	0	0	0	0	0	0	0	5.17889e-07	0	0	5.17889e-07	0	0	0	0	0	0	0	0	0	0	0	0	0	0
639	1	639	0	0	0	0	0	1	1	0	0	0	12760000	12780000	0	0	0	0	0	1.39678e-05	1.16649e-05	0	0	0	0	0	0	0	0	0	0	5.17889e-07	6.11658e-07	0	1.12955e-06	0	0	0	0	0	0	0	0	0	0	0	0	0	0
640	1	640	0	0	0	1	1	0	0	0	0	0	12780000	12800000	0	0	0	5.21118e-06	4.48209e-05	0	0	0	0	0	0	0	0	0	5.43748e-06	0	0	0	0	1.35575e-06	6.79323e-06	0	0	0	0	0	0	0	0	0	0	0	0	0	0
641	1	641	0	0	0	0	0	0	0	0	1	0	12800000	12820000	0	0	0	0	0	0	0	0	1.82652e-05	0	0	0	0	0	0	0	6.57388e-07	0	0	0	6.57388e-07	0	0	0	0	0	0	0	0	0	0	0	0	0	0
642	1	642	0	0	0	0	0	3	0	0	0	0	12820000	12840000	0	0	0	0	0	4.19035e-05	0	0	0	0	0	0	0	0	0	0	0	1.55367e-06	0	0	1.55367e-06	0	0	0	0	0	0	0	0	0	0	0	0	0	0
643	1	643	0	0	0	0	0	0	1	0	0	4	12840000	12860000	0	0	0	0	0	0	1.16649e-05	0	0	0.000589797	0	0	0	7.75904e-05	0	0	0	0	6.11658e-07	0	7.8202e-05	0	0	0	0	0	0	0	0	0	0	0	0	0	0
644	1	644	0	0	0	1	0	0	4	0	0	1	12860000	12880000	0	0	0	5.21118e-06	0	0	4.66597e-05	0	0	0.000147449	0	0	0	1.93976e-05	0	0	0	0	2.44663e-06	1.35575e-06	2.32e-05	0	0	0	0	0	0	0	0	0	0	0	0	0	0
645	1	645	0	0	0	1	0	0	0	2	0	0	12880000	12900000	0	0	0	5.21118e-06	0	0	0	4.17179e-05	0	0	0	0	0	0	0	7.19677e-06	0	0	0	1.35575e-06	8.55251e-06	0	0	0	0	0	0	0	0	0	0	0	0	0	0
646	1	646	0	0	0	0	0	0	0	0	1	0	12900000	12920000	0	0	0	0	0	0	0	0	1.82652e-05	0	0	0	0	0	0	0	6.57388e-07	0	0	0	6.57388e-07	0	0	0	0	0	0	0	0	0	0	0	0	0	0
647	1	647	0	0	0	0	0	0	1	0	0	1	12920000	12940000	0	0	0	0	0	0	1.16649e-05	0	0	0.000147449	0	0	0	1.93976e-05	0	0	0	0	6.11658e-07	0	2.00092e-05	0	0	0	0	0	0	0	0	0	0	0	0	0	0
648	1	648	0	0	0	0	0	0	0	0	0	0	12940000	12960000	0	0	0	0	0	0	0	0	0	0	0	0	0	0	0	0	0	0	0	0	0	0	0	0	0	0	0	0	0	0	0	0	0	0	0
649	1	649	0	0	0	0	0	0	0	0	0	0	12960000	12980000	0	0	0	0	0	0	0	0	0	0	0	0	0	0	0	0	0	0	0	0	0	0	0	0	0	0	0	0	0	0	0	0	0	0	0
650	1	650	0	0	0	0	0	0	0	0	0	0	12980000	13000000	0	0	0	0	0	0	0	0	0	0	0	0	0	0	0	0	0	0	0	0	0	0	0	0	0	0	0	0	0	0	0	0	0	0	0
651	1	651	0	0	0	0	0	0	0	0	0	0	13000000	13020000	0	0	0	0	0	0	0	0	0	0	0	0	0	0	0	0	0	0	0	0	0	0	0	0	0	0	0	0	0	0	0	0	0	0	0
652	1	652	0	0	0	0	0	0	0	0	0	0	13020000	13040000	0	0	0	0	0	0	0	0	0	0	0	0	0	0	0	0	0	0	0	0	0	0	0	0	0	0	0	0	0	0	0	0	0	0	0
653	1	653	0	0	0	0	0	0	0	0	0	0	13040000	13060000	0	0	0	0	0	0	0	0	0	0	0	0	0	0	0	0	0	0	0	0	0	0	0	0	0	0	0	0	0	0	0	0	0	0	0
654	1	654	0	0	0	0	0	0	0	0	0	0	13060000	13080000	0	0	0	0	0	0	0	0	0	0	0	0	0	0	0	0	0	0	0	0	0	0	0	0	0	0	0	0	0	0	0	0	0	0	0
[truncated: 64,881 more rows]
[truncated: 41 more columns]

## Sheet: structural_mutation_final_50_kb
	chr	new_wind	bkpt_in_window_blood	bkpt_in_window_bone	bkpt_in_window_brain	bkpt_in_window_breast	bkpt_in_window_liver	bkpt_in_window_ovary	bkpt_in_window_pancreatic	bkpt_in_window_prostate	bkpt_in_window_skin	bkpt_in_window_uterus	from	to	density_blood	density_bone	density_brain	density_breast	density_liver	density_ovary	density_pancreatic	density_prostate	density_skin	density_uterus	prod_density_blood	prod_density_brain	prod_density_bone	prod_density_uterus	prod_density_liver	prod_density_prostate	prod_density_skin	prod_density_ovary	prod_density_pancreatic	prod_density_breast	overall_density	blood_bkpt_hotspot_0.1	bone_bkpt_hotspot_0.1	brain_bkpt_hotspot_0.1	breast_bkpt_hotspot_0.1	liver_bkpt_hotspot_0.1	ovary_bkpt_hotspot_0.1	pancreatic_bkpt_hotspot_0.1	prostate_bkpt_hotspot_0.1	skin_bkpt_hotspot_0.1	uterus_bkpt_hotspot_0.1	overall_density_bkpt_hotspot_0.1	blood_bkpt_hotspot_0.05	bone_bkpt_hotspot_0.05	brain_bkpt_hotspot_0.05
[truncated: 60,739 more rows]
[truncated: 30 more columns]

[truncated: 3 more sheets: structural_mutation_final_100_k, structural_mutation_final_500_k, structural_mutation_final_1_mb.]
